# Supplementary material for: A Multi-Scale Computational Study on the Mechanism of Streptococcus pneumoniae Nicotinamidase (SpNic)
Source: PubMed Central journal article supplement (PMC6271260; doi:10.3390/molecules191015735), 2014-09-29
Supplement: molecules-19-15735-s001.pdf [file molecules-19-15735-s001.pdf]

# **A Multi-Scale Computational Study on the Mechanism of *Streptococcus pneumoniae* Nicotinamidase (SpNic)**

Bogdan F. Ion, Erum Kazim, James W. Gauld

Department of Chemistry and Biochemistry, University of Windsor, Windsor, Ontario,  
N9B 3P4, Canada

## **Supporting Information**

(Table S1; total pages: 150)

**Table S1.** Cartesian coordinates and partial charges from the QM/MM optimized structures of each stationary point along the SpNic pathway.

| RC             |    |            |           |           |   |      |    |
|----------------|----|------------|-----------|-----------|---|------|----|
| C-CT--0.3662   | -1 | -10.318774 | 3.893278  | 4.028288  | L |      |    |
| C-C-0.5972     | 0  | -8.979322  | 3.258284  | 3.784726  | L |      |    |
| O-O--0.5679    | 0  | -8.401332  | 2.684489  | 4.700777  | L |      |    |
| H-HC-0.1123    | 0  | -11.055043 | 3.426341  | 3.376974  | L |      |    |
| H-HC-0.1123    | 0  | -10.252599 | 4.957075  | 3.807034  | L |      |    |
| H-HC-0.1123    | 0  | -10.599066 | 3.747038  | 5.069157  | L |      |    |
| N-N--0.415700  | 0  | -8.509410  | 3.361766  | 2.548020  | L |      |    |
| C-CT--0.059700 | -1 | -7.349484  | 2.632131  | 2.027858  | L |      |    |
| C-C-0.597300   | 0  | -6.184882  | 3.589892  | 1.820878  | L |      |    |
| O-O--0.567900  | 0  | -6.297558  | 4.543025  | 1.055571  | L |      |    |
| C-CT-0.130300  | 0  | -7.724518  | 1.892598  | 0.718187  | L |      |    |
| C-CT--0.043000 | 0  | -8.891163  | 0.899032  | 0.948690  | L |      |    |
| C-CT--0.320400 | 0  | -6.504857  | 1.143942  | 0.150558  | L |      |    |
| C-CT--0.066000 | 0  | -9.464938  | 0.296331  | -0.339229 | L |      |    |
| H-H-0.271900   | 0  | -9.053618  | 3.919328  | 1.897757  | L |      |    |
| H-H1-0.086900  | 0  | -7.042452  | 1.879500  | 2.754052  | L |      |    |
| H-HC-0.018700  | 0  | -8.042920  | 2.634358  | -0.016762 | L |      |    |
| H-HC-0.023600  | 0  | -9.715670  | 1.410081  | 1.444322  | L |      |    |
| H-HC-0.023600  | 0  | -8.558752  | 0.090537  | 1.600977  | L |      |    |
| H-HC-0.088200  | 0  | -6.151789  | 0.395545  | 0.860966  | L |      |    |
| H-HC-0.088200  | 0  | -5.694294  | 1.841156  | -0.065267 | L |      |    |
| H-HC-0.088200  | 0  | -6.761097  | 0.660221  | -0.789845 | L |      |    |
| H-HC-0.018600  | 0  | -9.722821  | 1.090070  | -1.039743 | L |      |    |
| H-HC-0.018600  | 0  | -10.367183 | -0.265865 | -0.100976 | L |      |    |
| H-HC-0.018600  | 0  | -8.744467  | -0.381187 | -0.794587 | L |      |    |
| N-N--0.516300  | 0  | -5.086634  | 3.329853  | 2.524596  | L |      |    |
| C-CT-0.038100  | -1 | -3.784538  | 3.968859  | 2.394541  | L | H-HC | 30 |
| C-C-0.536600   | 0  | -3.733867  | 5.488885  | 2.130629  | L |      |    |
| O-O--0.581900  | 0  | -2.778894  | 6.017864  | 1.561711  | L |      |    |
| C-CT--0.547145 | 0  | -2.996924  | 3.171448  | 1.336178  | H |      |    |
| C-C-0.532653   | 0  | -2.496457  | 1.812920  | 1.794361  | H |      |    |
| O-O2--0.588507 | 0  | -2.676992  | 1.426678  | 2.957374  | H |      |    |
| O-O2--0.625559 | 0  | -1.846973  | 1.121297  | 0.903344  | H |      |    |
| H-H-0.293600   | 0  | -5.082886  | 2.482910  | 3.079897  | L |      |    |
| H-H1-0.088000  | 0  | -3.263305  | 3.839911  | 3.343878  | L |      |    |
| H-HC-0.128435  | 0  | -2.102566  | 3.745851  | 1.049319  | H |      |    |
| H-HC-0.183556  | 0  | -3.588548  | 3.095993  | 0.418483  | H |      |    |
| N-N--0.415700  | 0  | -4.696600  | 6.240448  | 2.646256  | L |      |    |
| C-CT--0.025200 | -1 | -4.664358  | 7.686168  | 2.526339  | L |      |    |
| C-C-0.597300   | 0  | -3.766040  | 8.311101  | 3.577075  | L |      |    |
| O-O--0.567900  | 0  | -4.243594  | 8.950484  | 4.514808  | L |      |    |
| H-H-0.271900   | 0  | -5.496383  | 5.752073  | 3.015974  | L |      |    |
| H-H1-0.069800  | 0  | -5.672613  | 8.076189  | 2.658222  | L |      |    |
| H-H1-0.069800  | 0  | -4.314342  | 7.977867  | 1.534823  | L |      |    |
| N-N--0.415700  | 0  | -2.461819  | 8.109420  | 3.420264  | L |      |    |
| C-CT--0.038900 | -1 | -1.442663  | 8.547211  | 4.369049  | L |      |    |
| C-C-0.597300   | 0  | -0.526483  | 9.619857  | 3.771356  | L |      |    |

|                |    |           |           |           |   |
|----------------|----|-----------|-----------|-----------|---|
| O-O--0.567900  | 0  | -0.604305 | 9.961453  | 2.590049  | L |
| C-CT-0.365400  | 0  | -0.599410 | 7.390649  | 4.946129  | L |
| O-OH--0.676100 | 0  | 0.548100  | 7.177061  | 4.165119  | L |
| C-CT--0.243800 | 0  | -1.339981 | 6.066976  | 5.111023  | L |
| H-H-0.271900   | 0  | -2.191419 | 7.537668  | 2.623133  | L |
| H-H1-0.100700  | 0  | -1.946836 | 9.008982  | 5.216202  | L |
| H-H1-0.004300  | 0  | -0.258232 | 7.700202  | 5.934574  | L |
| H-HC-0.064200  | 0  | -2.256961 | 6.227043  | 5.676624  | L |
| H-HC-0.064200  | 0  | -0.703522 | 5.368903  | 5.649855  | L |
| H-HC-0.064200  | 0  | -1.578744 | 5.641440  | 4.136384  | L |
| H-HO-0.410200  | 0  | 1.058545  | 6.440354  | 4.566148  | L |
| N-N--0.415700  | 0  | 0.376339  | 10.146971 | 4.602611  | L |
| C-CT--0.025200 | -1 | 1.422639  | 11.077455 | 4.189764  | L |
| C-C-0.597300   | 0  | 2.305283  | 10.590459 | 3.048639  | L |
| O-O--0.567900  | 0  | 2.595740  | 11.353071 | 2.132190  | L |
| H-H-0.271900   | 0  | 0.412702  | 9.776266  | 5.537059  | L |
| H-H1-0.069800  | 0  | 2.069149  | 11.293734 | 5.039254  | L |
| H-H1-0.069800  | 0  | 0.956992  | 12.010317 | 3.871155  | L |
| N-N--0.516300  | 0  | 2.728314  | 9.331317  | 3.118066  | L |
| C-CT-0.038100  | -1 | 3.631304  | 8.727793  | 2.139353  | L |
| C-C-0.536600   | 0  | 2.995750  | 8.414482  | 0.796841  | L |
| O-O--0.581900  | 0  | 3.720851  | 8.075281  | -0.132679 | L |
| C-CT--0.030300 | 0  | 4.211290  | 7.416449  | 2.701126  | L |
| C-C-0.799400   | -1 | 5.562811  | 7.614310  | 3.365349  | L |
| O-O2--0.801400 | -1 | 6.142013  | 8.719237  | 3.285938  | L |
| O-O2--0.801400 | -1 | 6.023548  | 6.660081  | 4.024432  | L |
| H-H-0.293600   | 0  | 2.394237  | 8.738623  | 3.863363  | L |
| H-H1-0.088000  | 0  | 4.434208  | 9.431228  | 1.915724  | L |
| H-HC--0.012200 | 0  | 4.356785  | 6.688206  | 1.901531  | L |
| H-HC--0.012200 | 0  | 3.510955  | 6.973163  | 3.412265  | L |
| N-N--0.415700  | 0  | 1.676140  | 8.521678  | 0.678667  | L |
| C-CT--0.002400 | -1 | 0.962132  | 8.320122  | -0.574996 | L |
| C-C-0.597300   | 0  | 0.364064  | 9.612852  | -1.129648 | L |
| O-O--0.567900  | 0  | 0.319939  | 9.808287  | -2.344143 | L |
| C-CT--0.034300 | 0  | -0.109879 | 7.234044  | -0.403494 | L |
| C-CA-0.011800  | 0  | 0.403996  | 5.889171  | 0.087991  | L |
| C-CA--0.125600 | 0  | 1.063397  | 5.002360  | -0.784002 | L |
| C-CA--0.125600 | 0  | 0.189439  | 5.506507  | 1.422879  | L |
| C-CA--0.170400 | 0  | 1.486570  | 3.743139  | -0.316955 | L |
| C-CA--0.170400 | 0  | 0.593965  | 4.244861  | 1.887087  | L |
| C-CA--0.107200 | 0  | 1.236601  | 3.358843  | 1.010696  | L |
| H-H-0.271900   | 0  | 1.159490  | 8.760133  | 1.513021  | L |
| H-H1-0.097800  | 0  | 1.652942  | 7.957249  | -1.335409 | L |
| H-HC-0.029500  | 0  | -0.598765 | 7.076903  | -1.365914 | L |
| H-HC-0.029500  | 0  | -0.871269 | 7.599101  | 0.287567  | L |
| H-HA-0.133000  | 0  | 1.227074  | 5.282188  | -1.813882 | L |
| H-HA-0.133000  | 0  | -0.332455 | 6.176244  | 2.083209  | L |
| H-HA-0.143000  | 0  | 1.988449  | 3.054004  | -0.976594 | L |
| H-HA-0.143000  | 0  | 0.383712  | 3.950965  | 2.905205  | L |
| H-HA-0.129700  | 0  | 1.523526  | 2.378859  | 1.356796  | L |
| N-N--0.4157    | 0  | -0.072610 | 10.514396 | -0.248154 | L |
| C-CT--0.1490   | -1 | -0.489875 | 11.852763 | -0.610840 | L |
| H-H-0.2719     | 0  | -0.043099 | 10.263185 | 0.734665  | L |
| H-H1-0.0976    | 0  | -0.863311 | 12.370802 | 0.273042  | L |

|                |    |           |           |           |   |
|----------------|----|-----------|-----------|-----------|---|
| H-H1-0.0976    | 0  | -1.277949 | 11.799905 | -1.363859 | L |
| H-H1-0.0976    | 0  | 0.360739  | 12.400096 | -1.019934 | L |
| C-CT--0.3662   | -1 | 7.972068  | 8.441410  | -0.140280 | L |
| C-C-0.5972     | 0  | 7.510083  | 7.658204  | -1.345920 | L |
| O-O--0.5679    | 0  | 8.328214  | 7.330101  | -2.201332 | L |
| H-HC-0.1123    | 0  | 7.504945  | 9.423791  | -0.144694 | L |
| H-HC-0.1123    | 0  | 9.054487  | 8.542888  | -0.171829 | L |
| H-HC-0.1123    | 0  | 7.688081  | 7.908341  | 0.767903  | L |
| N-N--0.415700  | 0  | 6.202193  | 7.399914  | -1.436823 | L |
| C-CT--0.051800 | -1 | 5.552284  | 6.867745  | -2.642907 | L |
| C-C-0.597300   | 0  | 4.880065  | 7.975165  | -3.453646 | L |
| O-O--0.567900  | 0  | 5.180988  | 8.184018  | -4.628646 | L |
| C-CT--0.110200 | 0  | 4.635000  | 5.668946  | -2.316974 | L |
| C-CT-0.353100  | 0  | 4.761932  | 4.540180  | -3.362442 | L |
| C-CT--0.412100 | 0  | 3.912496  | 3.337086  | -2.971188 | L |
| C-CT--0.412100 | 0  | 4.319212  | 4.944983  | -4.770914 | L |
| H-H-0.271900   | 0  | 5.600766  | 7.700434  | -0.677235 | L |
| H-H1-0.092200  | 0  | 6.346717  | 6.487933  | -3.286587 | L |
| H-HC-0.045700  | 0  | 3.597863  | 5.996707  | -2.242107 | L |
| H-HC-0.045700  | 0  | 4.922945  | 5.257318  | -1.349273 | L |
| H-HC--0.036100 | 0  | 5.802183  | 4.214179  | -3.404339 | L |
| H-HC-0.100000  | 0  | 2.854402  | 3.585479  | -3.045380 | L |
| H-HC-0.100000  | 0  | 4.143642  | 3.037492  | -1.951128 | L |
| H-HC-0.100000  | 0  | 4.135980  | 2.502427  | -3.633037 | L |
| H-HC-0.100000  | 0  | 3.317804  | 5.375047  | -4.737686 | L |
| H-HC-0.100000  | 0  | 4.317244  | 4.075032  | -5.426460 | L |
| H-HC-0.100000  | 0  | 5.011497  | 5.677385  | -5.182525 | L |
| N-N--0.4157    | 0  | 3.994775  | 8.705757  | -2.789415 | L |
| C-CT--0.1490   | -1 | 3.342040  | 9.897025  | -3.264810 | L |
| H-H-0.2719     | 0  | 3.846851  | 8.431668  | -1.825801 | L |
| H-H1-0.0976    | 0  | 4.037234  | 10.492257 | -3.858444 | L |
| H-H1-0.0976    | 0  | 2.991213  | 10.488043 | -2.417517 | L |
| H-H1-0.0976    | 0  | 2.486071  | 9.622831  | -3.883799 | L |
| C-CT--0.3662   | -1 | -8.731618 | 2.342491  | 8.133372  | L |
| C-C-0.5972     | 0  | -7.850961 | 1.138740  | 7.952919  | L |
| O-O--0.5679    | 0  | -7.516019 | 0.465294  | 8.920453  | L |
| H-HC-0.1123    | 0  | -9.656461 | 2.189914  | 7.580490  | L |
| H-HC-0.1123    | 0  | -8.214166 | 3.221131  | 7.751362  | L |
| H-HC-0.1123    | 0  | -8.947313 | 2.470224  | 9.192142  | L |
| N-N--0.415700  | 0  | -7.469550 | 0.883827  | 6.709513  | L |
| C-CT--0.038900 | -1 | -6.666835 | -0.269133 | 6.296447  | L |
| C-C-0.597300   | 0  | -5.400596 | 0.217585  | 5.614336  | L |
| O-O--0.567900  | 0  | -5.437651 | 0.645428  | 4.460353  | L |
| C-CT-0.365400  | 0  | -7.473394 | -1.234704 | 5.414637  | L |
| O-OH--0.676100 | 0  | -8.015549 | -0.569959 | 4.299144  | L |
| C-CT--0.243800 | 0  | -8.631514 | -1.848756 | 6.206563  | L |
| H-H-0.271900   | 0  | -7.808524 | 1.500863  | 5.975362  | L |
| H-H1-0.100700  | 0  | -6.366492 | -0.833129 | 7.179323  | L |
| H-H1-0.004300  | 0  | -6.816289 | -2.034080 | 5.069983  | L |
| H-HC-0.064200  | 0  | -8.242814 | -2.380175 | 7.074934  | L |
| H-HC-0.064200  | 0  | -9.183403 | -2.546578 | 5.582992  | L |
| H-HC-0.064200  | 0  | -9.318314 | -1.069549 | 6.535427  | L |
| H-HO-0.410200  | 0  | -7.319899 | 0.015444  | 3.966983  | L |
| N-N--0.415700  | 0  | -4.309946 | 0.212696  | 6.384658  | L |

|                |    |           |           |          |   |      |     |
|----------------|----|-----------|-----------|----------|---|------|-----|
| C-CT--0.059700 | -1 | -3.115011 | 1.030236  | 6.164089 | L |      |     |
| C-C-0.597300   | 0  | -1.865938 | 0.154835  | 6.093314 | L |      |     |
| O-O--0.567900  | 0  | -1.607360 | -0.649392 | 6.992758 | L |      |     |
| C-CT-0.130300  | 0  | -2.990854 | 2.106256  | 7.268279 | L |      |     |
| C-CT--0.043000 | 0  | -4.248651 | 2.996628  | 7.428074 | L |      |     |
| C-CT--0.320400 | 0  | -1.754024 | 2.985036  | 7.025315 | L |      |     |
| C-CT--0.066000 | 0  | -4.681645 | 3.780548  | 6.179900 | L |      |     |
| H-H-0.271900   | 0  | -4.380321 | -0.220537 | 7.291319 | L |      |     |
| H-H1-0.086900  | 0  | -3.220241 | 1.553909  | 5.218350 | L |      |     |
| H-HC-0.018700  | 0  | -2.843170 | 1.594873  | 8.221417 | L |      |     |
| H-HC-0.023600  | 0  | -4.065492 | 3.712519  | 8.230154 | L |      |     |
| H-HC-0.023600  | 0  | -5.085137 | 2.376652  | 7.749616 | L |      |     |
| H-HC-0.088200  | 0  | -1.755822 | 3.346975  | 5.997189 | L |      |     |
| H-HC-0.088200  | 0  | -0.848435 | 2.398280  | 7.183033 | L |      |     |
| H-HC-0.088200  | 0  | -1.742431 | 3.827800  | 7.715393 | L |      |     |
| H-HC-0.018600  | 0  | -3.883331 | 4.442397  | 5.848467 | L |      |     |
| H-HC-0.018600  | 0  | -5.558673 | 4.381960  | 6.419495 | L |      |     |
| H-HC-0.018600  | 0  | -4.942556 | 3.098784  | 5.373510 | L |      |     |
| N-N--0.516300  | 0  | -1.113910 | 0.336808  | 5.013141 | L |      |     |
| C-CT-0.038100  | -1 | 0.182582  | -0.249395 | 4.726448 | L | H-HC | 178 |
| C-C-0.536600   | 0  | 1.126970  | -0.092671 | 5.923447 | L |      |     |
| O-O--0.581900  | 0  | 1.345173  | 1.001535  | 6.436211 | L |      |     |
| C-CT--0.520019 | 0  | 0.670199  | 0.395513  | 3.414965 | H |      |     |
| C-C-0.636404   | 0  | 0.995919  | -0.571524 | 2.290349 | H |      |     |
| O-O2--0.608036 | 0  | 0.429268  | -1.701284 | 2.222952 | H |      |     |
| O-O2--0.608131 | 0  | 1.824105  | -0.111368 | 1.436151 | H |      |     |
| H-H-0.293600   | 0  | -1.510368 | 0.940532  | 4.300152 | L |      |     |
| H-H1-0.088000  | 0  | 0.025395  | -1.317567 | 4.570729 | L |      |     |
| H-HC-0.132300  | 0  | 1.553483  | 1.005589  | 3.615926 | H |      |     |
| H-HC-0.188993  | 0  | -0.093602 | 1.073244  | 3.018703 | H |      |     |
| N-N--0.415700  | 0  | 1.667181  | -1.204768 | 6.389372 | L |      |     |
| C-CT-0.033700  | -1 | 2.567440  | -1.255297 | 7.518582 | L |      |     |
| C-C-0.597300   | 0  | 3.788541  | -2.073714 | 7.114728 | L |      |     |
| O-O--0.567900  | 0  | 3.836854  | -3.299975 | 7.262121 | L |      |     |
| C-CT--0.182500 | 0  | 1.811596  | -1.820145 | 8.729541 | L |      |     |
| H-H-0.271900   | 0  | 1.360440  | -2.082557 | 5.984846 | L |      |     |
| H-H1-0.082300  | 0  | 2.911456  | -0.251154 | 7.773957 | L |      |     |
| H-HC-0.060300  | 0  | 0.971082  | -1.167504 | 8.968850 | L |      |     |
| H-HC-0.060300  | 0  | 2.482540  | -1.874157 | 9.586626 | L |      |     |
| H-HC-0.060300  | 0  | 1.436099  | -2.818948 | 8.501199 | L |      |     |
| N-N--0.4157    | 0  | 4.758719  | -1.375955 | 6.536559 | L |      |     |
| C-CT-0.0188    | -1 | 5.964056  | -1.955934 | 5.988536 | L | H-HC | 200 |
| C-C-0.5973     | 0  | 7.161521  | -1.806942 | 6.936022 | L |      |     |
| O-O--0.5679    | 0  | 7.208542  | -0.955332 | 7.826029 | L |      |     |
| C-CT--0.517456 | 0  | 6.216694  | -1.317460 | 4.620424 | H |      |     |
| C-CM-0.287351  | 0  | 5.348366  | -1.798520 | 3.516449 | H |      |     |
| N-N2--0.586994 | 0  | 5.496675  | -3.051160 | 2.937097 | H |      |     |
| C-CM--0.020338 | 0  | 4.367281  | -1.192836 | 2.782274 | H |      |     |
| C-CM-0.242458  | 0  | 4.630588  | -3.142135 | 1.892519 | H |      |     |
| N-N2--0.505070 | 0  | 3.937059  | -2.025921 | 1.769861 | H |      |     |
| H-H-0.2719     | 0  | 4.654928  | -0.366390 | 6.483505 | L |      |     |
| H-H1-0.0881    | 0  | 5.819205  | -3.022386 | 5.846743 | L |      |     |
| H-HC-0.166355  | 0  | 7.272228  | -1.479774 | 4.357014 | H |      |     |
| H-HC-0.174481  | 0  | 6.099949  | -0.239134 | 4.755452 | H |      |     |

|                |    |           |            |           |            |
|----------------|----|-----------|------------|-----------|------------|
| H-H-0.335795   | 0  | 6.147126  | -3.766543  | 3.254702  | H          |
| H-H4-0.152777  | 0  | 3.961717  | -0.200339  | 2.907660  | H          |
| H-H5-0.209475  | 0  | 4.534622  | -4.008565  | 1.253136  | H          |
| N-N--0.4157    | 0  | 8.166088  | -2.645678  | 6.689493  | L          |
| C-CT--0.1490   | -1 | 9.435536  | -2.575021  | 7.379757  | L          |
| H-H-0.2719     | 0  | 8.014713  | -3.324565  | 5.950083  | L          |
| H-H1-0.0976    | 0  | 10.108496 | -3.344469  | 7.000139  | L          |
| H-H1-0.0976    | 0  | 9.278413  | -2.723203  | 8.449568  | L          |
| H-H1-0.0976    | 0  | 9.882779  | -1.591810  | 7.222527  | L          |
| C-CT--0.3662   | -1 | 8.367291  | -9.381643  | 0.905241  | L          |
| C-C-0.5972     | 0  | 8.738057  | -9.137622  | -0.545038 | L          |
| O-O--0.5679    | 0  | 9.756688  | -8.508092  | -0.803206 | L          |
| H-HC-0.1123    | 0  | 8.307100  | -10.450389 | 1.096973  | L          |
| H-HC-0.1123    | 0  | 7.419410  | -8.894379  | 1.126169  | L          |
| H-HC-0.1123    | 0  | 9.139803  | -8.943006  | 1.536779  | L          |
| N-N--0.254800  | 0  | 7.927580  | -9.607172  | -1.510021 | L          |
| C-CT--0.026600 | -1 | 8.168814  | -9.365550  | -2.934763 | L          |
| C-C-0.589600   | 0  | 8.014204  | -7.892760  | -3.315123 | L          |
| O-O--0.574800  | 0  | 8.720846  | -7.393768  | -4.187820 | L          |
| C-CT--0.007000 | 0  | 7.167329  | -10.263003 | -3.669510 | L          |
| C-CT-0.018900  | 0  | 6.010933  | -10.403470 | -2.678426 | L          |
| C-CT-0.019200  | 0  | 6.706833  | -10.378221 | -1.316850 | L          |
| H-H1-0.064100  | 0  | 9.182861  | -9.671336  | -3.195484 | L          |
| H-HC-0.025300  | 0  | 7.618661  | -11.241813 | -3.838734 | L          |
| H-HC-0.025300  | 0  | 6.840465  | -9.829927  | -4.616179 | L          |
| H-HC-0.021300  | 0  | 5.456981  | -11.330169 | -2.831234 | L          |
| H-HC-0.021300  | 0  | 5.345593  | -9.543050  | -2.765643 | L          |
| H-H1-0.039100  | 0  | 6.055034  | -9.919418  | -0.572030 | L          |
| H-H1-0.039100  | 0  | 6.965862  | -11.394289 | -1.016117 | L          |
| N-N--0.516300  | 0  | 7.092613  | -7.198467  | -2.646971 | L          |
| C-CT-0.039700  | -1 | 6.840269  | -5.771249  | -2.816200 | L          |
| C-C-0.536600   | 0  | 8.098829  | -4.905963  | -2.683304 | L          |
| O-O--0.581900  | 0  | 8.270544  | -3.918674  | -3.402003 | L          |
| C-CT-0.056000  | 0  | 5.739330  | -5.336480  | -1.843504 | L H-HC 244 |
| C-CT--0.515956 | 0  | 5.210263  | -3.947438  | -2.212774 | H          |
| C-C-0.587828   | 0  | 4.112359  | -3.421279  | -1.296527 | H          |
| O-O2--0.600319 | 0  | 4.050331  | -2.139399  | -1.250359 | H          |
| O-O2--0.589127 | 0  | 3.356348  | -4.216780  | -0.694581 | H          |
| H-H-0.293600   | 0  | 6.564159  | -7.676541  | -1.936344 | L          |
| H-H1-0.110500  | 0  | 6.466896  | -5.616128  | -3.828799 | L          |
| H-HC--0.017300 | 0  | 6.130479  | -5.324645  | -0.824996 | L          |
| H-HC--0.017300 | 0  | 4.915943  | -6.050587  | -1.898317 | L          |
| H-HC-0.167759  | 0  | 4.810451  | -3.988401  | -3.233206 | H          |
| H-HC-0.135230  | 0  | 6.032624  | -3.223641  | -2.214870 | H          |
| N-N--0.415700  | 0  | 9.010419  | -5.313970  | -1.802683 | L          |
| C-CT--0.024900 | -1 | 10.247270 | -4.609839  | -1.484960 | L          |
| C-C-0.597300   | 0  | 11.266316 | -4.490332  | -2.611152 | L          |
| O-O--0.567900  | 0  | 12.239256 | -3.747706  | -2.479411 | L          |
| C-CT-0.211700  | 0  | 10.891431 | -5.246494  | -0.247474 | L          |
| O-OH--0.654600 | 0  | 9.937372  | -5.435008  | 0.787267  | L          |
| H-H-0.271900   | 0  | 8.805972  | -6.128445  | -1.240028 | L          |
| H-H1-0.084300  | 0  | 9.977068  | -3.587779  | -1.215168 | L          |
| H-H1-0.035200  | 0  | 11.691906 | -4.598910  | 0.113257  | L          |
| H-H1-0.035200  | 0  | 11.316338 | -6.214740  | -0.516377 | L          |

|                |    |           |           |           |   |
|----------------|----|-----------|-----------|-----------|---|
| H-HO-0.427500  | 0  | 9.382545  | -4.627016 | 0.862998  | L |
| N-N--0.415700  | 0  | 11.031332 | -5.177200 | -3.727367 | L |
| C-CT-0.033700  | -1 | 11.780429 | -5.009851 | -4.965929 | L |
| C-C-0.597300   | 0  | 10.955073 | -4.432083 | -6.119666 | L |
| O-O--0.567900  | 0  | 11.399667 | -4.414597 | -7.266511 | L |
| C-CT--0.182500 | 0  | 12.389457 | -6.375324 | -5.316140 | L |
| H-H-0.271900   | 0  | 10.223126 | -5.789027 | -3.733880 | L |
| H-H1-0.082300  | 0  | 12.605630 | -4.314602 | -4.805740 | L |
| H-HC-0.060300  | 0  | 13.003378 | -6.729884 | -4.487451 | L |
| H-HC-0.060300  | 0  | 13.015022 | -6.282587 | -6.204627 | L |
| H-HC-0.060300  | 0  | 11.593996 | -7.096148 | -5.512081 | L |
| N-N--0.415700  | 0  | 9.767396  | -3.932384 | -5.796126 | L |
| C-CT--0.025200 | -1 | 8.863699  | -3.252555 | -6.701219 | L |
| C-C-0.597300   | 0  | 8.797261  | -1.750256 | -6.476245 | L |
| O-O--0.567900  | 0  | 8.781687  | -0.975888 | -7.430204 | L |
| H-H-0.271900   | 0  | 9.479864  | -4.008739 | -4.826720 | L |
| H-H1-0.069800  | 0  | 7.860186  | -3.654940 | -6.566652 | L |
| H-H1-0.069800  | 0  | 9.161212  | -3.428044 | -7.735544 | L |
| N-N--0.415700  | 0  | 8.754263  | -1.346316 | -5.209709 | L |
| C-CT--0.002400 | -1 | 8.577797  | 0.037479  | -4.787129 | L |
| C-C-0.597300   | 0  | 9.685864  | 0.469553  | -3.820890 | L |
| O-O--0.567900  | 0  | 10.297249 | -0.382822 | -3.168493 | L |
| C-CT--0.034300 | 0  | 7.185513  | 0.160552  | -4.141381 | L |
| C-CA-0.011800  | 0  | 6.047366  | -0.094111 | -5.112572 | L |
| C-CA--0.125600 | 0  | 5.657054  | 0.909667  | -6.019542 | L |
| C-CA--0.125600 | 0  | 5.411492  | -1.349574 | -5.146983 | L |
| C-CA--0.170400 | 0  | 4.647347  | 0.654614  | -6.965366 | L |
| C-CA--0.170400 | 0  | 4.397861  | -1.602471 | -6.088353 | L |
| C-CA--0.107200 | 0  | 4.021095  | -0.604086 | -7.003842 | L |
| H-H-0.271900   | 0  | 8.780562  | -2.053530 | -4.484588 | L |
| H-H1-0.097800  | 0  | 8.615296  | 0.689603  | -5.659859 | L |
| H-HC-0.029500  | 0  | 7.058625  | 1.156590  | -3.718034 | L |
| H-HC-0.029500  | 0  | 7.120105  | -0.548452 | -3.314444 | L |
| H-HA-0.133000  | 0  | 6.142543  | 1.874663  | -6.001540 | L |
| H-HA-0.133000  | 0  | 5.712425  | -2.126334 | -4.459302 | L |
| H-HA-0.143000  | 0  | 4.354068  | 1.425793  | -7.663494 | L |
| H-HA-0.143000  | 0  | 3.909181  | -2.565708 | -6.110050 | L |
| H-HA-0.129700  | 0  | 3.241279  | -0.800537 | -7.726520 | L |
| N-N--0.254800  | 0  | 9.948923  | 1.782151  | -3.680984 | L |
| C-CT--0.026600 | -1 | 10.812780 | 2.275385  | -2.614918 | L |
| C-C-0.589600   | 0  | 10.177570 | 2.028088  | -1.238020 | L |
| O-O--0.574800  | 0  | 8.982191  | 1.725625  | -1.160182 | L |
| C-CT--0.007000 | 0  | 10.976659 | 3.774351  | -2.898722 | L |
| C-CT-0.018900  | 0  | 9.662964  | 4.145935  | -3.584319 | L |
| C-CT-0.019200  | 0  | 9.351834  | 2.897474  | -4.409662 | L |
| H-H1-0.064100  | 0  | 11.781134 | 1.778972  | -2.669859 | L |
| H-HC-0.025300  | 0  | 11.804297 | 3.924738  | -3.593422 | L |
| H-HC-0.025300  | 0  | 11.133084 | 4.359236  | -1.990988 | L |
| H-HC-0.021300  | 0  | 9.765760  | 5.033014  | -4.210097 | L |
| H-HC-0.021300  | 0  | 8.884446  | 4.295296  | -2.833474 | L |
| H-H1-0.039100  | 0  | 8.273550  | 2.792434  | -4.520840 | L |
| H-H1-0.039100  | 0  | 9.822015  | 2.978918  | -5.390508 | L |
| N-N--0.254800  | 0  | 10.943466 | 2.138162  | -0.142323 | L |
| C-CT--0.026600 | -1 | 10.390029 | 2.121441  | 1.204575  | L |

|                |    |           |           |           |            |
|----------------|----|-----------|-----------|-----------|------------|
| C-C-0.589600   | 0  | 9.336431  | 3.204198  | 1.440236  | L          |
| O-O--0.574800  | 0  | 9.593309  | 4.384513  | 1.214683  | L          |
| C-CT--0.007000 | 0  | 11.589220 | 2.305061  | 2.145466  | L          |
| C-CT-0.018900  | 0  | 12.776770 | 1.820630  | 1.317227  | L          |
| C-CT-0.019200  | 0  | 12.393412 | 2.240632  | -0.098841 | L          |
| H-H1-0.064100  | 0  | 9.950574  | 1.138734  | 1.381816  | L          |
| H-HC-0.025300  | 0  | 11.472729 | 1.724083  | 3.060897  | L          |
| H-HC-0.025300  | 0  | 11.730746 | 3.360923  | 2.383586  | L          |
| H-HC-0.021300  | 0  | 12.841869 | 0.732472  | 1.369689  | L          |
| H-HC-0.021300  | 0  | 13.712009 | 2.280396  | 1.637592  | L          |
| H-H1-0.039100  | 0  | 12.690850 | 3.275436  | -0.273931 | L          |
| H-H1-0.039100  | 0  | 12.870213 | 1.576402  | -0.820410 | L          |
| N-N--0.4157    | 0  | 8.169530  | 2.777705  | 1.913497  | L          |
| C-CT-0.0188    | -1 | 7.011072  | 3.604876  | 2.204911  | L H-HC 334 |
| C-C-0.5973     | 0  | 6.144079  | 3.009801  | 3.312258  | L          |
| O-O--0.5679    | 0  | 6.151598  | 1.798409  | 3.530080  | L          |
| C-CT--0.515368 | 0  | 6.194635  | 3.720572  | 0.889863  | H          |
| C-CM-0.287903  | 0  | 5.601222  | 2.440804  | 0.378673  | H          |
| N-N2--0.582625 | 0  | 6.221756  | 1.657498  | -0.581230 | H          |
| C-CM--0.036893 | 0  | 4.482546  | 1.717152  | 0.721610  | H          |
| C-CM-0.243454  | 0  | 5.489239  | 0.530135  | -0.772191 | H          |
| N-N2--0.523998 | 0  | 4.429050  | 0.531747  | 0.014514  | H          |
| H-H-0.2719     | 0  | 8.035052  | 1.780387  | 1.998207  | L          |
| H-H1-0.0881    | 0  | 7.342198  | 4.600138  | 2.516756  | L          |
| H-HC-0.162301  | 0  | 6.852325  | 4.173841  | 0.133908  | H          |
| H-HC-0.188340  | 0  | 5.399300  | 4.455238  | 1.066911  | H          |
| H-H-0.339448   | 0  | 7.129455  | 1.862313  | -0.998773 | H          |
| H-H4-0.185957  | 0  | 3.720125  | 1.971364  | 1.442224  | H          |
| H-H5-0.211295  | 0  | 5.759599  | -0.258597 | -1.458931 | H          |
| N-N--0.415700  | 0  | 5.373194  | 3.871332  | 3.963779  | L          |
| C-CT-0.014300  | -1 | 4.546261  | 3.582481  | 5.126400  | L          |
| C-C-0.597300   | 0  | 5.198837  | 2.628989  | 6.137539  | L          |
| O-O--0.567900  | 0  | 4.673572  | 1.576536  | 6.504643  | L          |
| C-CT--0.204100 | 0  | 3.082423  | 3.334900  | 4.740021  | L          |
| C-C-0.713000   | 0  | 2.186079  | 4.173571  | 5.633814  | L          |
| N-N--0.919100  | 0  | 1.711435  | 3.658481  | 6.734043  | L          |
| O-O--0.593100  | 0  | 1.941333  | 5.341811  | 5.389198  | L          |
| H-H-0.271900   | 0  | 5.516080  | 4.859694  | 3.747593  | L          |
| H-H1-0.104800  | 0  | 4.538455  | 4.537704  | 5.656805  | L          |
| H-HC-0.079700  | 0  | 2.846532  | 2.280336  | 4.835137  | L          |
| H-HC-0.079700  | 0  | 2.905451  | 3.644583  | 3.710552  | L          |
| H-H-0.419600   | 0  | 1.079267  | 4.217065  | 7.265740  | L          |
| H-H-0.419600   | 0  | 1.778071  | 2.645516  | 6.835181  | L          |
| N-N--0.4157    | 0  | 6.386038  | 3.059838  | 6.577260  | L          |
| C-CT--0.1490   | -1 | 7.292337  | 2.320582  | 7.434412  | L          |
| H-H-0.2719     | 0  | 6.697669  | 3.934999  | 6.179290  | L          |
| H-H1-0.0976    | 0  | 8.038122  | 2.989426  | 7.863702  | L          |
| H-H1-0.0976    | 0  | 7.790723  | 1.542206  | 6.853487  | L          |
| H-H1-0.0976    | 0  | 6.732249  | 1.835939  | 8.237306  | L          |
| C-CT--0.3662   | -1 | -2.249635 | -2.764975 | 9.534783  | L          |
| C-C-0.5972     | 0  | -2.376222 | -3.853316 | 8.504167  | L          |
| O-O--0.5679    | 0  | -2.922377 | -4.914593 | 8.792445  | L          |
| H-HC-0.1123    | 0  | -1.195365 | -2.548677 | 9.696436  | L          |
| H-HC-0.1123    | 0  | -2.705979 | -3.099626 | 10.464015 | L          |



|                |    |           |           |           |            |
|----------------|----|-----------|-----------|-----------|------------|
| H-HC-0.1123    | 0  | -2.756385 | -1.871682 | 9.174616  | L          |
| N-N--0.347900  | 0  | -1.844570 | -3.592191 | 7.313426  | L          |
| C-CT--0.240000 | -1 | -1.741109 | -4.556858 | 6.212241  | L          |
| C-C-0.734100   | 0  | -0.333440 | -4.586311 | 5.629685  | L          |
| O-O--0.589400  | 0  | 0.476233  | -3.697264 | 5.876073  | L          |
| C-CT--0.009400 | 0  | -2.835430 | -4.268955 | 5.164256  | L          |
| C-CT-0.018700  | 0  | -2.623060 | -2.967555 | 4.381336  | L H-HC 379 |
| C-CT--0.464524 | 0  | -3.698092 | -2.789854 | 3.302824  | H          |
| C-CT--0.195159 | 0  | -3.578388 | -1.476034 | 2.540446  | H          |
| N-N3--0.748751 | 0  | -2.337190 | -1.383600 | 1.704141  | H          |
| H-H-0.274700   | 0  | -1.448293 | -2.664395 | 7.179305  | L          |
| H-H1-0.142600  | 0  | -1.925480 | -5.553960 | 6.613005  | L          |
| H-HC-0.036200  | 0  | -3.803909 | -4.228459 | 5.665786  | L          |
| H-HC-0.036200  | 0  | -2.873247 | -5.088520 | 4.453762  | L          |
| H-HC-0.010300  | 0  | -1.641399 | -2.978243 | 3.907717  | L          |
| H-HC-0.010300  | 0  | -2.682514 | -2.130285 | 5.069334  | L          |
| H-HC-0.173903  | 0  | -4.678228 | -2.807571 | 3.788282  | H          |
| H-HC-0.148535  | 0  | -3.661267 | -3.643608 | 2.612141  | H          |
| H-HP-0.236066  | 0  | -3.584107 | -0.599584 | 3.187667  | H          |
| H-HP-0.172509  | 0  | -4.413757 | -1.378564 | 1.835888  | H          |
| H-H-0.437293   | 0  | -2.142702 | -0.363004 | 1.396303  | H          |
| H-H-0.366736   | 0  | -2.464171 | -1.926952 | 0.840286  | H          |
| H-H-0.419451   | 0  | -1.460043 | -1.687628 | 2.166768  | H          |
| N-N--0.415700  | 0  | -0.032395 | -5.622559 | 4.860068  | L          |
| C-CT--0.025200 | -1 | 1.281899  | -5.817143 | 4.256842  | L          |
| C-C-0.597300   | 0  | 1.161214  | -6.532683 | 2.910444  | L          |
| O-O--0.567900  | 0  | 1.757313  | -7.581395 | 2.674991  | L          |
| H-H-0.271900   | 0  | -0.770800 | -6.284448 | 4.640486  | L          |
| H-H1-0.069800  | 0  | 1.904733  | -6.417555 | 4.920078  | L          |
| H-H1-0.069800  | 0  | 1.771928  | -4.857378 | 4.089290  | L          |
| N-N--0.415700  | 0  | 0.338303  | -5.951529 | 2.042603  | L          |
| C-CT--0.025200 | -1 | -0.227257 | -6.545107 | 0.834563  | L          |
| C-C-0.597300   | 0  | -1.363576 | -5.656597 | 0.390971  | L          |
| O-O--0.567900  | 0  | -2.240480 | -5.375440 | 1.200167  | L          |
| H-H-0.271900   | 0  | -0.113355 | -5.110900 | 2.377243  | L          |
| H-H1-0.069800  | 0  | -0.612795 | -7.540011 | 1.057253  | L          |
| H-H1-0.069800  | 0  | 0.538782  | -6.605938 | 0.061028  | L          |
| N-N--0.4157    | 0  | -1.327819 | -5.204720 | -0.862202 | L          |
| C-CT--0.0014   | -1 | -2.156065 | -4.110766 | -1.374254 | L          |
| C-C-0.5973     | 0  | -3.622399 | -4.184483 | -0.931628 | L          |
| O-O--0.5679    | 0  | -4.189060 | -3.215854 | -0.434760 | L          |
| C-CT--0.0152   | 0  | -2.051217 | -4.065269 | -2.912657 | L          |
| C-CA--0.0011   | 0  | -0.662002 | -4.277112 | -3.490093 | L          |
| C-CA--0.1906   | 0  | 0.362267  | -3.343269 | -3.241773 | L          |
| C-CA--0.1906   | 0  | -0.397797 | -5.413676 | -4.281114 | L          |
| C-CA--0.2341   | 0  | 1.647974  | -3.547500 | -3.778559 | L          |
| C-CA--0.2341   | 0  | 0.886208  | -5.620135 | -4.820453 | L          |
| C-C-0.3226     | 0  | 1.913271  | -4.684520 | -4.568276 | L          |
| O-OH--0.5579   | 0  | 3.149025  | -4.881366 | -5.099631 | L          |
| H-H-0.2719     | 0  | -0.514290 | -5.429139 | -1.417321 | L          |
| H-H1-0.0876    | 0  | -1.739210 | -3.186889 | -0.978006 | L          |
| H-HC-0.0295    | 0  | -2.414299 | -3.101342 | -3.262437 | L          |
| H-HC-0.0295    | 0  | -2.715774 | -4.820795 | -3.332680 | L          |
| H-HA-0.1699    | 0  | 0.168521  | -2.461974 | -2.640410 | L          |

|                |    |            |            |           |   |
|----------------|----|------------|------------|-----------|---|
| H-HA-0.1699    | 0  | -1.188144  | -6.119544  | -4.491411 | L |
| H-HA-0.1656    | 0  | 2.435010   | -2.835112  | -3.585273 | L |
| H-HA-0.1656    | 0  | 1.080397   | -6.484427  | -5.434385 | L |
| H-HO-0.3992    | 0  | 3.167585   | -5.666890  | -5.643985 | L |
| N-N--0.415700  | 0  | -4.218625  | -5.367877  | -1.091892 | L |
| C-CT--0.024900 | -1 | -5.554753  | -5.658532  | -0.593248 | L |
| C-C-0.597300   | 0  | -5.683116  | -5.578073  | 0.925993  | L |
| O-O--0.567900  | 0  | -5.044592  | -6.331119  | 1.670254  | L |
| C-CT-0.211700  | 0  | -6.014519  | -7.054618  | -1.017816 | L |
| O-OH--0.654600 | -1 | -7.272984  | -7.361075  | -0.433052 | L |
| H-H-0.271900   | 0  | -3.642216  | -6.108724  | -1.448557 | L |
| H-H1-0.084300  | 0  | -6.242748  | -4.937702  | -1.035354 | L |
| H-H1-0.035200  | 0  | -5.281211  | -7.790580  | -0.686003 | L |
| H-H1-0.035200  | 0  | -6.090276  | -7.096830  | -2.104395 | L |
| H-HO-0.427500  | -1 | -7.529484  | -8.233514  | -0.741844 | L |
| N-N--0.415700  | 0  | -6.660714  | -4.782270  | 1.353217  | L |
| C-CT-0.033700  | -1 | -7.153374  | -4.689629  | 2.716301  | L |
| C-C-0.597300   | 0  | -7.503150  | -6.018585  | 3.390969  | L |
| O-O--0.567900  | 0  | -7.427521  | -6.126672  | 4.612967  | L |
| C-CT--0.182500 | 0  | -8.347147  | -3.734527  | 2.723766  | L |
| H-H-0.271900   | 0  | -7.123986  | -4.205255  | 0.657803  | L |
| H-H1-0.082300  | 0  | -6.366195  | -4.240107  | 3.320493  | L |
| H-HC-0.060300  | 0  | -8.062841  | -2.768821  | 2.301813  | L |
| H-HC-0.060300  | 0  | -8.685338  | -3.591131  | 3.745434  | L |
| H-HC-0.060300  | 0  | -9.163908  | -4.161566  | 2.147764  | L |
| N-N--0.415700  | 0  | -7.897998  | -7.022606  | 2.607422  | L |
| C-CT--0.025200 | -1 | -8.274267  | -8.336983  | 3.113405  | L |
| C-C-0.597300   | 0  | -7.314311  | -9.460861  | 2.743944  | L |
| O-O--0.567900  | 0  | -7.729415  | -10.614002 | 2.652132  | L |
| H-H-0.271900   | 0  | -7.887935  | -6.853968  | 1.607945  | L |
| H-H1-0.069800  | 0  | -9.254153  | -8.592916  | 2.711478  | L |
| H-H1-0.069800  | 0  | -8.362031  | -8.320368  | 4.200002  | L |
| N-N--0.415700  | 0  | -6.030029  | -9.147945  | 2.577343  | L |
| C-CT--0.024900 | -1 | -4.955744  | -10.140997 | 2.588214  | L |
| C-C-0.597300   | 0  | -4.253805  | -10.105439 | 3.939843  | L |
| O-O--0.567900  | 0  | -3.933357  | -9.030313  | 4.456136  | L |
| C-CT-0.211700  | 0  | -3.965717  | -9.847472  | 1.456453  | L |
| O-OH--0.654600 | -1 | -3.076126  | -10.937283 | 1.269131  | L |
| H-H-0.271900   | 0  | -5.776542  | -8.167689  | 2.657185  | L |
| H-H1-0.084300  | 0  | -5.367570  | -11.136696 | 2.423097  | L |
| H-H1-0.035200  | 0  | -3.404115  | -8.938741  | 1.679814  | L |
| H-H1-0.035200  | 0  | -4.524743  | -9.694031  | 0.532577  | L |
| H-HO-0.427500  | -1 | -2.535821  | -10.747110 | 0.498705  | L |
| N-N--0.4157    | 0  | -4.054165  | -11.283144 | 4.530565  | L |
| C-CT--0.1490   | -1 | -3.517609  | -11.430200 | 5.872468  | L |
| H-H-0.2719     | 0  | -4.332783  | -12.102447 | 4.014374  | L |
| H-H1-0.0976    | 0  | -3.314401  | -12.479440 | 6.086876  | L |
| H-H1-0.0976    | 0  | -4.232458  | -11.044576 | 6.602725  | L |
| H-H1-0.0976    | 0  | -2.590388  | -10.859897 | 5.967298  | L |
| C-CT--0.3662   | -1 | -12.149536 | 5.064516   | -0.643094 | L |
| C-C-0.5972     | 0  | -10.720308 | 5.242094   | -0.203061 | L |
| O-O--0.5679    | 0  | -10.402121 | 4.963854   | 0.947704  | L |
| H-HC-0.1123    | 0  | -12.542899 | 6.020341   | -0.982282 | L |
| H-HC-0.1123    | 0  | -12.735317 | 4.706155   | 0.201835  | L |

|                |    |            |          |           |   |      |     |
|----------------|----|------------|----------|-----------|---|------|-----|
| H-HC-0.1123    | 0  | -12.185694 | 4.330815 | -1.446293 | L |      |     |
| N-N--0.415700  | 0  | -9.871876  | 5.694129 | -1.121854 | L |      |     |
| C-CT--0.025200 | -1 | -8.438803  | 5.860404 | -0.894704 | L |      |     |
| C-C-0.597300   | 0  | -7.622775  | 5.727335 | -2.156734 | L |      |     |
| O-O--0.567900  | 0  | -8.132503  | 6.011204 | -3.247122 | L |      |     |
| H-H-0.271900   | 0  | -10.186954 | 5.862043 | -2.065120 | L |      |     |
| H-H1-0.069800  | 0  | -8.125356  | 5.084955 | -0.206141 | L |      |     |
| H-H1-0.069800  | 0  | -8.238913  | 6.833170 | -0.447643 | L |      |     |
| N-N--0.415700  | 0  | -6.362313  | 5.321020 | -1.981035 | L | H-H1 | 489 |
| C-CT--0.530209 | -1 | -5.353712  | 5.292698 | -3.040570 | H |      |     |
| C-C-0.568093   | 0  | -4.520706  | 4.026323 | -2.934579 | H |      |     |
| O-O--0.528105  | 0  | -4.329029  | 3.471206 | -1.838905 | H |      |     |
| C-CT-0.298500  | 0  | -4.468348  | 6.562338 | -3.001308 | L | H-H1 | 489 |
| C-CT--0.319200 | 0  | -5.279689  | 7.812110 | -3.348873 | L |      |     |
| C-CT--0.319200 | 0  | -3.776239  | 6.771964 | -1.650997 | L |      |     |
| H-H-0.271900   | 0  | -6.063405  | 5.055098 | -1.044432 | L |      |     |
| H-H1-0.184096  | 0  | -5.883396  | 5.308022 | -3.999245 | H |      |     |
| H-HC--0.029700 | 0  | -3.694993  | 6.463900 | -3.761850 | L |      |     |
| H-HC-0.079100  | 0  | -6.007779  | 8.016334 | -2.565636 | L |      |     |
| H-HC-0.079100  | 0  | -5.799678  | 7.657831 | -4.293307 | L |      |     |
| H-HC-0.079100  | 0  | -4.607906  | 8.664254 | -3.443831 | L |      |     |
| H-HC-0.079100  | 0  | -4.510900  | 6.898748 | -0.857369 | L |      |     |
| H-HC-0.079100  | 0  | -3.138339  | 7.653312 | -1.694731 | L |      |     |
| H-HC-0.079100  | 0  | -3.154658  | 5.908322 | -1.413795 | L |      |     |
| N-N--0.610103  | 0  | -3.949413  | 3.575984 | -4.067637 | H |      |     |
| C-CT--0.314060 | -1 | -4.240469  | 4.006026 | -5.419715 | H |      |     |
| C-C-0.597300   | 0  | -5.363916  | 3.181476 | -6.035357 | L | H-H1 | 505 |
| O-O--0.567900  | 0  | -5.497767  | 1.980630 | -5.799279 | L |      |     |
| C-CT--0.110200 | 0  | -2.967407  | 3.925466 | -6.299167 | L | H-H1 | 505 |
| C-CT-0.353100  | 0  | -1.973748  | 5.097327 | -6.114664 | L |      |     |
| C-CT--0.412100 | 0  | -1.105268  | 5.009435 | -4.858415 | L |      |     |
| C-CT--0.412100 | 0  | -1.021054  | 5.158174 | -7.312546 | L |      |     |
| H-H-0.398207   | 0  | -3.321500  | 2.775274 | -3.975445 | H |      |     |
| H-H1-0.165130  | 0  | -4.559416  | 5.048384 | -5.421999 | H |      |     |
| H-HC-0.045700  | 0  | -3.291507  | 3.938176 | -7.340025 | L |      |     |
| H-HC-0.045700  | 0  | -2.456623  | 2.977418 | -6.138204 | L |      |     |
| H-HC--0.036100 | 0  | -2.533571  | 6.032917 | -6.089667 | L |      |     |
| H-HC-0.100000  | 0  | -0.505802  | 4.101404 | -4.882245 | L |      |     |
| H-HC-0.100000  | 0  | -1.736130  | 4.991265 | -3.971014 | L |      |     |
| H-HC-0.100000  | 0  | -0.451096  | 5.877823 | -4.793227 | L |      |     |
| H-HC-0.100000  | 0  | -0.443635  | 4.236386 | -7.372146 | L |      |     |
| H-HC-0.100000  | 0  | -0.340353  | 6.001284 | -7.195328 | L |      |     |
| H-HC-0.100000  | 0  | -1.589945  | 5.291666 | -8.231154 | L |      |     |
| N-N--0.415700  | 0  | -6.146189  | 3.829325 | -6.896354 | L |      |     |
| C-CT--0.038900 | -1 | -7.330921  | 3.237401 | -7.529321 | L |      |     |
| C-C-0.597300   | 0  | -7.076536  | 1.899357 | -8.211659 | L |      |     |
| O-O--0.567900  | 0  | -7.944109  | 1.029161 | -8.230444 | L |      |     |
| C-CT-0.365400  | -1 | -7.969366  | 4.163233 | -8.589126 | L |      |     |
| O-OH--0.676100 | -1 | -7.909192  | 5.519601 | -8.138459 | L |      |     |
| C-CT--0.243800 | 0  | -9.445934  | 3.866343 | -8.848806 | L |      |     |
| H-H-0.271900   | 0  | -6.013085  | 4.824831 | -6.997483 | L |      |     |
| H-H1-0.100700  | 0  | -8.074529  | 3.093596 | -6.752245 | L |      |     |
| H-H1-0.004300  | 0  | -7.413514  | 4.089249 | -9.524798 | L |      |     |
| H-HC-0.064200  | 0  | -9.556542  | 2.859825 | -9.252252 | L |      |     |

|                |    |            |           |            |   |      |     |
|----------------|----|------------|-----------|------------|---|------|-----|
| H-HC-0.064200  | 0  | -9.841602  | 4.575353  | -9.575906  | L |      |     |
| H-HC-0.064200  | 0  | -10.011711 | 3.939915  | -7.919248  | L |      |     |
| H-HO-0.410200  | -1 | -8.807772  | 5.853702  | -8.102225  | L |      |     |
| N-N--0.415700  | 0  | -5.905020  | 1.771767  | -8.832024  | L |      |     |
| C-CT--0.025200 | -1 | -5.521015  | 0.614437  | -9.628337  | L |      |     |
| C-C-0.597300   | 0  | -4.617015  | -0.388601 | -8.941884  | L |      |     |
| O-O--0.567900  | 0  | -4.101326  | -1.275363 | -9.622005  | L |      |     |
| H-H-0.271900   | 0  | -5.228272  | 2.502639  | -8.673698  | L |      |     |
| H-H1-0.069800  | 0  | -4.999273  | 0.962497  | -10.518748 | L |      |     |
| H-H1-0.069800  | 0  | -6.410532  | 0.077894  | -9.958629  | L |      |     |
| N-N--0.415700  | 0  | -4.416494  | -0.227357 | -7.629588  | L | H-H1 | 545 |
| C-CT--0.539097 | -1 | -3.475596  | -0.999911 | -6.827804  | H |      |     |
| C-C-0.572106   | 0  | -4.214758  | -1.459572 | -5.571651  | H |      |     |
| O-O--0.533001  | 0  | -4.948423  | -2.441517 | -5.651079  | H |      |     |
| C-CT-0.130300  | 0  | -2.137422  | -0.238246 | -6.629857  | L | H-H1 | 545 |
| C-CT--0.043000 | 0  | -1.524344  | 0.256370  | -7.961979  | L |      |     |
| C-CT--0.320400 | 0  | -1.165697  | -1.193942 | -5.915336  | L |      |     |
| C-CT--0.066000 | 0  | -0.212115  | 1.037080  | -7.809010  | L |      |     |
| H-H-0.271900   | 0  | -4.899874  | 0.531641  | -7.159020  | L |      |     |
| H-H1-0.180646  | 0  | -3.251006  | -1.916522 | -7.383320  | H |      |     |
| H-HC-0.018700  | 0  | -2.317619  | 0.629548  | -5.999276  | L |      |     |
| H-HC-0.023600  | 0  | -2.229615  | 0.930513  | -8.446343  | L |      |     |
| H-HC-0.023600  | 0  | -1.357067  | -0.594854 | -8.623185  | L |      |     |
| H-HC-0.088200  | 0  | -0.960703  | -2.060218 | -6.543224  | L |      |     |
| H-HC-0.088200  | 0  | -1.586859  | -1.533227 | -4.971082  | L |      |     |
| H-HC-0.088200  | 0  | -0.232957  | -0.688107 | -5.680020  | L |      |     |
| H-HC-0.018600  | 0  | -0.343496  | 1.838797  | -7.083171  | L |      |     |
| H-HC-0.018600  | 0  | 0.062387   | 1.470618  | -8.770726  | L |      |     |
| H-HC-0.018600  | 0  | 0.592327   | 0.376978  | -7.485908  | L |      |     |
| N-N--0.611145  | 0  | -4.068413  | -0.711579 | -4.444315  | H |      |     |
| C-CT--0.109296 | -1 | -4.639724  | -1.110257 | -3.165690  | H |      |     |
| C-C-0.597300   | 0  | -6.165726  | -1.120660 | -3.173696  | L | H-H1 | 564 |
| O-O--0.567900  | 0  | -6.798216  | -2.040204 | -2.642861  | L |      |     |
| C-CT--0.388038 | 0  | -4.119795  | -0.282799 | -2.007938  | H |      |     |
| H-H-0.369964   | 0  | -3.395689  | 0.045100  | -4.410281  | H |      |     |
| H-H1-0.178541  | 0  | -4.385917  | -2.158129 | -2.972191  | H |      |     |
| H-H1-0.157964  | 0  | -4.718328  | -0.558770 | -1.134147  | H |      |     |
| H-H1-0.179833  | 0  | -4.247379  | 0.789207  | -2.178325  | H |      |     |
| H-HS-0.319500  | 0  | -2.229889  | 0.259747  | -0.695154  | H |      |     |
| N-N--0.415700  | 0  | -6.756476  | -0.130483 | -3.831190  | L |      |     |
| C-CT--0.087500 | -1 | -8.197579  | -0.072445 | -4.059419  | L |      |     |
| C-C-0.597300   | 0  | -8.681567  | -1.222685 | -4.928762  | L |      |     |
| O-O--0.567900  | 0  | -9.609804  | -1.932916 | -4.544719  | L |      |     |
| C-CT-0.298500  | 0  | -8.611722  | 1.291341  | -4.630112  | L |      |     |
| C-CT--0.319200 | 0  | -10.130134 | 1.406495  | -4.820193  | L |      |     |
| C-CT--0.319200 | 0  | -8.174213  | 2.456898  | -3.729052  | L |      |     |
| H-H-0.271900   | 0  | -6.127862  | 0.541974  | -4.263467  | L |      |     |
| H-H1-0.096900  | 0  | -8.691450  | -0.182801 | -3.095950  | L |      |     |
| H-HC--0.029700 | 0  | -8.136526  | 1.395668  | -5.596690  | L |      |     |
| H-HC-0.079100  | 0  | -10.636773 | 1.240511  | -3.869132  | L |      |     |
| H-HC-0.079100  | 0  | -10.474835 | 0.670338  | -5.546276  | L |      |     |
| H-HC-0.079100  | 0  | -10.379746 | 2.398724  | -5.195162  | L |      |     |
| H-HC-0.079100  | 0  | -8.626292  | 2.368035  | -2.742682  | L |      |     |
| H-HC-0.079100  | 0  | -8.466754  | 3.406933  | -4.175350  | L |      |     |

|                |    |            |           |           |   |
|----------------|----|------------|-----------|-----------|---|
| H-HC-0.079100  | 0  | -7.089725  | 2.468807  | -3.614064 | L |
| N-N--0.415700  | 0  | -8.055991  | -1.421592 | -6.087483 | L |
| C-CT--0.025200 | -1 | -8.405277  | -2.483888 | -7.026783 | L |
| C-C-0.597300   | 0  | -8.318961  | -3.883959 | -6.432240 | L |
| O-O--0.567900  | 0  | -9.222731  | -4.695642 | -6.617746 | L |
| H-H-0.271900   | 0  | -7.276657  | -0.813938 | -6.303961 | L |
| H-H1-0.069800  | 0  | -7.731967  | -2.435085 | -7.882326 | L |
| H-H1-0.069800  | 0  | -9.423597  | -2.324862 | -7.381159 | L |
| N-N--0.415700  | 0  | -7.232754  | -4.161914 | -5.713842 | L |
| C-CT--0.025200 | -1 | -7.007721  | -5.428830 | -5.028631 | L |
| C-C-0.597300   | 0  | -7.930492  | -5.691389 | -3.849455 | L |
| O-O--0.567900  | 0  | -8.247383  | -6.845074 | -3.566359 | L |
| H-H-0.271900   | 0  | -6.514481  | -3.442329 | -5.653992 | L |
| H-H1-0.069800  | 0  | -5.981449  | -5.450735 | -4.663896 | L |
| H-H1-0.069800  | 0  | -7.133686  | -6.243888 | -5.741574 | L |
| N-N--0.415700  | 0  | -8.329381  | -4.633781 | -3.146306 | L |
| C-CT--0.038900 | -1 | -9.378505  | -4.699305 | -2.126355 | L |
| C-C-0.597300   | 0  | -10.748743 | -4.993235 | -2.728108 | L |
| O-O--0.567900  | 0  | -11.491737 | -5.827369 | -2.211245 | L |
| C-CT-0.365400  | 0  | -9.421091  | -3.400625 | -1.306649 | L |
| O-OH--0.676100 | 0  | -8.182200  | -3.223664 | -0.657856 | L |
| C-CT--0.243800 | 0  | -10.501056 | -3.423904 | -0.225584 | L |
| H-H-0.271900   | 0  | -7.960410  | -3.726153 | -3.406591 | L |
| H-H1-0.100700  | 0  | -9.148003  | -5.516427 | -1.442782 | L |
| H-H1-0.004300  | 0  | -9.599078  | -2.548944 | -1.963277 | L |
| H-HC-0.064200  | 0  | -11.484695 | -3.321187 | -0.682663 | L |
| H-HC-0.064200  | 0  | -10.347868 | -2.596422 | 0.466590  | L |
| H-HC-0.064200  | 0  | -10.459302 | -4.366321 | 0.318723  | L |
| H-HO-0.410200  | 0  | -7.598550  | -2.766814 | -1.297321 | L |
| N-N--0.4157    | 0  | -11.098340 | -4.286854 | -3.804327 | L |
| C-CT--0.1490   | -1 | -12.331554 | -4.475800 | -4.539638 | L |
| H-H-0.2719     | 0  | -10.430848 | -3.605635 | -4.154594 | L |
| H-H1-0.0976    | 0  | -12.404220 | -3.726556 | -5.328899 | L |
| H-H1-0.0976    | 0  | -13.183363 | -4.383572 | -3.864415 | L |
| H-H1-0.0976    | 0  | -12.334764 | -5.470621 | -4.988341 | L |
| N-N2--0.511415 | 0  | 1.990885   | 0.013178  | -1.702423 | H |
| C-CA-0.057801  | 0  | 0.835895   | 0.694342  | -1.663551 | H |
| C-CA-0.063496  | 0  | 0.290110   | 1.311659  | -2.793852 | H |
| C-CA--0.109122 | 0  | 0.988464   | 1.223438  | -3.999205 | H |
| C-CA--0.164490 | 0  | 2.194600   | 0.541079  | -4.033050 | H |
| C-CA-0.098392  | 0  | 2.656132   | -0.056504 | -2.866439 | H |
| C-C-0.541263   | 0  | -1.055448  | 1.971720  | -2.838726 | H |
| O-O--0.574884  | 0  | -1.685443  | 1.920797  | -3.911187 | H |
| N-N--0.751108  | 0  | -1.491989  | 2.628590  | -1.752104 | H |
| H-H4-0.220889  | 0  | 0.338472   | 0.729287  | -0.696964 | H |
| H-HA-0.160434  | 0  | 0.564251   | 1.682498  | -4.883954 | H |
| H-HA-0.142191  | 0  | 2.774116   | 0.470939  | -4.944902 | H |
| H-H4-0.174502  | 0  | 3.576778   | -0.628588 | -2.847268 | H |
| H-H-0.412468   | 0  | -2.473371  | 2.924441  | -1.734689 | H |
| H-H-0.353801   | 0  | -1.085229  | 2.465606  | -0.836151 | H |
| Zn-ZN-0.974537 | 0  | 2.828696   | -1.110871 | 0.005810  | H |
| O-OW--0.834000 | 0  | -2.126326  | -7.253582 | 3.473219  | L |
| H-HW-0.417000  | 0  | -2.587594  | -6.669050 | 2.852517  | L |
| H-HW-0.417000  | 0  | -2.832931  | -7.819432 | 3.826385  | L |

|                |   |           |           |           |   |
|----------------|---|-----------|-----------|-----------|---|
| O-OW--0.783903 | 0 | 1.313375  | -2.588121 | -0.132754 | H |
| H-HW-0.401253  | 0 | 0.948764  | -2.488196 | 0.784545  | H |
| H-HW-0.424111  | 0 | 1.924178  | -3.366840 | -0.189701 | H |
| O-OW--0.834000 | 0 | -3.603239 | -8.456231 | 7.198162  | L |
| H-HW-0.417000  | 0 | -3.703318 | -7.517413 | 7.375232  | L |
| H-HW-0.417000  | 0 | -3.747044 | -8.532804 | 6.243025  | L |
| O-OW--0.834000 | 0 | 7.172960  | -0.013463 | 1.797977  | L |
| H-HW-0.417000  | 0 | 6.866526  | 0.391490  | 2.629299  | L |
| H-HW-0.417000  | 0 | 6.381795  | 0.070452  | 1.243014  | L |
| O-OW--0.834000 | 0 | 7.062605  | -4.950581 | 4.750835  | L |
| H-HW-0.417000  | 0 | 6.113794  | -5.022881 | 4.980756  | L |
| H-HW-0.417000  | 0 | 7.285940  | -5.834640 | 4.456724  | L |
| O-OW--0.834000 | 0 | 8.573746  | -0.920996 | -0.303223 | L |
| H-HW-0.417000  | 0 | 8.137240  | -0.541965 | 0.486080  | L |
| H-HW-0.417000  | 0 | 8.823373  | -0.132658 | -0.806069 | L |
| O-OW--0.834000 | 0 | 12.601765 | -1.051548 | -1.925285 | L |
| H-HW-0.417000  | 0 | 11.752229 | -0.807900 | -2.331187 | L |
| H-HW-0.417000  | 0 | 12.629134 | -2.011025 | -2.061922 | L |
| O-OW--0.834000 | 0 | 8.286108  | -3.283765 | 0.970211  | L |
| H-HW-0.417000  | 0 | 8.470329  | -2.522004 | 0.382224  | L |
| H-HW-0.417000  | 0 | 7.581508  | -2.940774 | 1.529354  | L |
| O-OW--0.834000 | 0 | 4.371124  | -4.920661 | 5.153550  | L |
| H-HW-0.417000  | 0 | 4.100604  | -4.540860 | 6.012326  | L |
| H-HW-0.417000  | 0 | 4.067919  | -4.251970 | 4.529148  | L |
| S-SH--0.326142 | 0 | -2.358638 | -0.685154 | -1.666104 | H |

**TS1**

|                |    |            |           |           |   |
|----------------|----|------------|-----------|-----------|---|
| C-CT--0.366200 | -1 | -10.314430 | 3.913965  | 4.029183  | L |
| C-C-0.597200   | 0  | -8.979378  | 3.271212  | 3.785151  | L |
| O-O--0.567900  | 0  | -8.407284  | 2.691573  | 4.700928  | L |
| H-HC-0.112300  | 0  | -11.053192 | 3.452873  | 3.376568  | L |
| H-HC-0.112300  | 0  | -10.241302 | 4.977721  | 3.810022  | L |
| H-HC-0.112300  | 0  | -10.596118 | 3.767508  | 5.069635  | L |
| N-N--0.415700  | 0  | -8.507621  | 3.375878  | 2.549192  | L |
| C-CT--0.059700 | -1 | -7.345984  | 2.647952  | 2.030579  | L |
| C-C-0.597300   | 0  | -6.182870  | 3.609474  | 1.828245  | L |
| O-O--0.567900  | 0  | -6.292301  | 4.557745  | 1.055791  | L |
| C-CT-0.130300  | 0  | -7.717222  | 1.906184  | 0.720931  | L |
| C-CT--0.043000 | 0  | -8.884152  | 0.912674  | 0.950484  | L |
| C-CT--0.320400 | 0  | -6.496062  | 1.156473  | 0.158114  | L |
| C-CT--0.066000 | 0  | -9.455671  | 0.308530  | -0.337726 | L |
| H-H-0.271900   | 0  | -9.048611  | 3.936825  | 1.899351  | L |
| H-H1-0.086900  | 0  | -7.038689  | 1.896069  | 2.757157  | L |
| H-HC-0.018700  | 0  | -8.033965  | 2.646400  | -0.016234 | L |
| H-HC-0.023600  | 0  | -9.709683  | 1.424070  | 1.443991  | L |
| H-HC-0.023600  | 0  | -8.552690  | 0.105018  | 1.604331  | L |
| H-HC-0.088200  | 0  | -6.139025  | 0.415138  | 0.874110  | L |
| H-HC-0.088200  | 0  | -5.688002  | 1.854219  | -0.063133 | L |
| H-HC-0.088200  | 0  | -6.749393  | 0.664133  | -0.778501 | L |
| H-HC-0.018600  | 0  | -9.710991  | 1.101418  | -1.040140 | L |
| H-HC-0.018600  | 0  | -10.359081 | -0.252255 | -0.100648 | L |
| H-HC-0.018600  | 0  | -8.734858  | -0.370525 | -0.790223 | L |
| N-N--0.516300  | 0  | -5.089200  | 3.360549  | 2.543540  | L |

|                |    |           |           |           |           |
|----------------|----|-----------|-----------|-----------|-----------|
| C-CT-0.038100  | -1 | -3.780305 | 3.983455  | 2.394669  | L H-HC 30 |
| C-C-0.536600   | 0  | -3.710519 | 5.502590  | 2.134634  | L         |
| O-O--0.581900  | 0  | -2.735828 | 6.024279  | 1.590602  | L         |
| C-CT--0.547145 | 0  | -3.027459 | 3.167600  | 1.330104  | H         |
| C-C-0.532653   | 0  | -2.495642 | 1.853459  | 1.846489  | H         |
| O-O2--0.588507 | 0  | -2.675934 | 1.447103  | 2.981035  | H         |
| O-O2--0.625559 | 0  | -1.739750 | 1.146493  | 1.003635  | H         |
| H-H-0.293600   | 0  | -5.088235 | 2.517180  | 3.106035  | L         |
| H-H1-0.088000  | 0  | -3.248863 | 3.849021  | 3.337803  | L         |
| H-HC-0.128435  | 0  | -2.155135 | 3.741896  | 0.986313  | H         |
| H-HC-0.183556  | 0  | -3.651195 | 3.049533  | 0.438203  | H         |
| N-N--0.415700  | 0  | -4.682606 | 6.255548  | 2.631393  | L         |
| C-CT--0.025200 | -1 | -4.658200 | 7.701428  | 2.520369  | L         |
| C-C-0.597300   | 0  | -3.763159 | 8.330170  | 3.572831  | L         |
| O-O--0.567900  | 0  | -4.242114 | 8.963686  | 4.513771  | L         |
| H-H-0.271900   | 0  | -5.489858 | 5.761587  | 2.977599  | L         |
| H-H1-0.069800  | 0  | -5.668730 | 8.085524  | 2.652230  | L         |
| H-H1-0.069800  | 0  | -4.307660 | 7.996682  | 1.530190  | L         |
| N-N--0.415700  | 0  | -2.458496 | 8.139562  | 3.411351  | L         |
| C-CT--0.038900 | -1 | -1.435887 | 8.563883  | 4.361331  | L         |
| C-C-0.597300   | 0  | -0.532351 | 9.653712  | 3.774431  | L         |
| O-O--0.567900  | 0  | -0.632620 | 10.026130 | 2.603947  | L         |
| C-CT-0.365400  | 0  | -0.572333 | 7.394751  | 4.876379  | L         |
| O-OH--0.676100 | 0  | 0.505260  | 7.161170  | 4.006794  | L         |
| C-CT--0.243800 | 0  | -1.325432 | 6.085278  | 5.091786  | L         |
| H-H-0.271900   | 0  | -2.186140 | 7.564735  | 2.616922  | L         |
| H-H1-0.100700  | 0  | -1.931671 | 8.995094  | 5.229353  | L         |
| H-H1-0.004300  | 0  | -0.152969 | 7.695616  | 5.837033  | L         |
| H-HC-0.064200  | 0  | -2.208160 | 6.264474  | 5.704198  | L         |
| H-HC-0.064200  | 0  | -0.674247 | 5.377840  | 5.599193  | L         |
| H-HC-0.064200  | 0  | -1.621926 | 5.658246  | 4.133903  | L         |
| H-HO-0.410200  | 0  | 1.047161  | 6.436612  | 4.387395  | L         |
| N-N--0.415700  | 0  | 0.389932  | 10.158241 | 4.598411  | L         |
| C-CT--0.025200 | -1 | 1.430703  | 11.092346 | 4.177549  | L         |
| C-C-0.597300   | 0  | 2.304720  | 10.601906 | 3.030823  | L         |
| O-O--0.567900  | 0  | 2.579458  | 11.356572 | 2.103115  | L         |
| H-H-0.271900   | 0  | 0.441850  | 9.773917  | 5.526604  | L         |
| H-H1-0.069800  | 0  | 2.082876  | 11.311956 | 5.021850  | L         |
| H-H1-0.069800  | 0  | 0.960536  | 12.023263 | 3.859671  | L         |
| N-N--0.516300  | 0  | 2.738650  | 9.347023  | 3.109212  | L         |
| C-CT-0.038100  | -1 | 3.637961  | 8.738124  | 2.130854  | L         |
| C-C-0.536600   | 0  | 2.998885  | 8.415993  | 0.792413  | L         |
| O-O--0.581900  | 0  | 3.726095  | 8.089062  | -0.139086 | L         |
| C-CT--0.030300 | 0  | 4.217225  | 7.428176  | 2.695953  | L         |
| C-C-0.799400   | -1 | 5.569010  | 7.625694  | 3.358522  | L         |
| O-O2--0.801400 | -1 | 6.148774  | 8.730188  | 3.277212  | L         |
| O-O2--0.801400 | -1 | 6.029319  | 6.672329  | 4.019153  | L         |
| H-H-0.293600   | 0  | 2.422841  | 8.762532  | 3.867793  | L         |
| H-H1-0.088000  | 0  | 4.441192  | 9.439470  | 1.901682  | L         |
| H-HC--0.012200 | 0  | 4.361362  | 6.697447  | 1.898340  | L         |
| H-HC--0.012200 | 0  | 3.516928  | 6.988221  | 3.408744  | L         |
| N-N--0.415700  | 0  | 1.676792  | 8.498281  | 0.679344  | L         |
| C-CT--0.002400 | -1 | 0.968314  | 8.327304  | -0.582559 | L         |
| C-C-0.597300   | 0  | 0.398721  | 9.634180  | -1.131130 | L         |

|                |    |           |           |           |   |
|----------------|----|-----------|-----------|-----------|---|
| O-O--0.567900  | 0  | 0.357355  | 9.832017  | -2.345455 | L |
| C-CT--0.034300 | 0  | -0.141578 | 7.276934  | -0.427400 | L |
| C-CA-0.011800  | 0  | 0.342792  | 5.867802  | -0.130923 | L |
| C-CA--0.125600 | 0  | 0.853030  | 5.056861  | -1.162694 | L |
| C-CA--0.125600 | 0  | 0.246005  | 5.347807  | 1.171954  | L |
| C-CA--0.170400 | 0  | 1.256013  | 3.738105  | -0.884021 | L |
| C-CA--0.170400 | 0  | 0.648385  | 4.031597  | 1.451162  | L |
| C-CA--0.107200 | 0  | 1.152241  | 3.226142  | 0.419362  | L |
| H-H-0.271900   | 0  | 1.157332  | 8.716952  | 1.517381  | L |
| H-H1-0.097800  | 0  | 1.653355  | 7.953409  | -1.343299 | L |
| H-HC-0.029500  | 0  | -0.711590 | 7.240575  | -1.356552 | L |
| H-HC-0.029500  | 0  | -0.827374 | 7.597942  | 0.358304  | L |
| H-HA-0.133000  | 0  | 0.925280  | 5.445153  | -2.168129 | L |
| H-HA-0.133000  | 0  | -0.178036 | 5.952296  | 1.955527  | L |
| H-HA-0.143000  | 0  | 1.637334  | 3.101719  | -1.665717 | L |
| H-HA-0.143000  | 0  | 0.539914  | 3.632614  | 2.449577  | L |
| H-HA-0.129700  | 0  | 1.443770  | 2.208195  | 0.626932  | L |
| N-N--0.415700  | 0  | -0.037448 | 10.535004 | -0.249714 | L |
| C-CT--0.149000 | -1 | -0.481873 | 11.860628 | -0.624157 | L |
| H-H-0.271900   | 0  | -0.012089 | 10.287963 | 0.734290  | L |
| H-H1-0.097600  | 0  | -0.844821 | 12.386587 | 0.259482  | L |
| H-H1-0.097600  | 0  | -1.284594 | 11.784815 | -1.359514 | L |
| H-H1-0.097600  | 0  | 0.351749  | 12.414240 | -1.058963 | L |
| C-CT--0.366200 | -1 | 7.978354  | 8.445701  | -0.148713 | L |
| C-C-0.597200   | 0  | 7.512302  | 7.665655  | -1.353955 | L |
| O-O--0.567900  | 0  | 8.328386  | 7.345790  | -2.214533 | L |
| H-HC-0.112300  | 0  | 7.502809  | 9.424051  | -0.142918 | L |
| H-HC-0.112300  | 0  | 9.059554  | 8.556791  | -0.189123 | L |
| H-HC-0.112300  | 0  | 7.707038  | 7.904974  | 0.758806  | L |
| N-N--0.415700  | 0  | 6.204415  | 7.402607  | -1.440728 | L |
| C-CT--0.051800 | -1 | 5.557519  | 6.869108  | -2.648480 | L |
| C-C-0.597300   | 0  | 4.856966  | 7.953346  | -3.465262 | L |
| O-O--0.567900  | 0  | 5.077224  | 8.094013  | -4.667863 | L |
| C-CT--0.110200 | 0  | 4.670511  | 5.640752  | -2.346115 | L |
| C-CT-0.353100  | 0  | 4.970467  | 4.462220  | -3.299568 | L |
| C-CT--0.412100 | 0  | 4.067913  | 3.269810  | -3.001169 | L |
| C-CT--0.412100 | 0  | 4.757819  | 4.793808  | -4.780840 | L |
| H-H-0.271900   | 0  | 5.603815  | 7.695065  | -0.677424 | L |
| H-H1-0.092200  | 0  | 6.362931  | 6.518817  | -3.294006 | L |
| H-HC-0.045700  | 0  | 3.617384  | 5.915839  | -2.417205 | L |
| H-HC-0.045700  | 0  | 4.855809  | 5.304135  | -1.325573 | L |
| H-HC--0.036100 | 0  | 6.005313  | 4.148315  | -3.156223 | L |
| H-HC-0.100000  | 0  | 3.048619  | 3.492925  | -3.311615 | L |
| H-HC-0.100000  | 0  | 4.082474  | 3.049883  | -1.934734 | L |
| H-HC-0.100000  | 0  | 4.423724  | 2.393789  | -3.541281 | L |
| H-HC-0.100000  | 0  | 3.763240  | 5.215586  | -4.928000 | L |
| H-HC-0.100000  | 0  | 4.860936  | 3.894049  | -5.384873 | L |
| H-HC-0.100000  | 0  | 5.501064  | 5.515841  | -5.115843 | L |
| N-N--0.415700  | 0  | 4.033296  | 8.734564  | -2.780984 | L |
| C-CT--0.149000 | -1 | 3.348779  | 9.898486  | -3.275226 | L |
| H-H-0.271900   | 0  | 3.933616  | 8.501845  | -1.801041 | L |
| H-H1-0.097600  | 0  | 4.023008  | 10.491568 | -3.894434 | L |
| H-H1-0.097600  | 0  | 2.998097  | 10.503985 | -2.438194 | L |
| H-H1-0.097600  | 0  | 2.490541  | 9.591083  | -3.875181 | L |



|                |    |           |           |          |            |
|----------------|----|-----------|-----------|----------|------------|
| C-CT--0.366200 | -1 | -8.727677 | 2.369211  | 8.136698 | L          |
| C-C-0.597200   | 0  | -7.869507 | 1.149189  | 7.957895 | L          |
| O-O--0.567900  | 0  | -7.555852 | 0.464343  | 8.924623 | L          |
| H-HC-0.112300  | 0  | -9.646544 | 2.241537  | 7.567745 | L          |
| H-HC-0.112300  | 0  | -8.185904 | 3.240305  | 7.771516 | L          |
| H-HC-0.112300  | 0  | -8.957280 | 2.491163  | 9.193182 | L          |
| N-N--0.415700  | 0  | -7.480693 | 0.896671  | 6.716678 | L          |
| C-CT--0.038900 | -1 | -6.664417 | -0.246537 | 6.303938 | L          |
| C-C-0.597300   | 0  | -5.408643 | 0.264435  | 5.620804 | L          |
| O-O--0.567900  | 0  | -5.470340 | 0.745820  | 4.489778 | L          |
| C-CT-0.365400  | 0  | -7.457001 | -1.220541 | 5.419298 | L          |
| O-OH--0.676100 | 0  | -8.007983 | -0.562263 | 4.304306 | L          |
| C-CT--0.243800 | 0  | -8.606510 | -1.850751 | 6.210943 | L          |
| H-H-0.271900   | 0  | -7.804026 | 1.522766  | 5.983117 | L          |
| H-H1-0.100700  | 0  | -6.355586 | -0.805838 | 7.186807 | L          |
| H-H1-0.004300  | 0  | -6.789322 | -2.010717 | 5.073933 | L          |
| H-HC-0.064200  | 0  | -8.210393 | -2.378732 | 7.078048 | L          |
| H-HC-0.064200  | 0  | -9.150118 | -2.553640 | 5.586441 | L          |
| H-HC-0.064200  | 0  | -9.302591 | -1.080726 | 6.541970 | L          |
| H-HO-0.410200  | 0  | -7.327325 | 0.047882  | 3.984402 | L          |
| N-N--0.415700  | 0  | -4.305243 | 0.226400  | 6.371876 | L          |
| C-CT--0.059700 | -1 | -3.111937 | 1.050777  | 6.169074 | L          |
| C-C-0.597300   | 0  | -1.864662 | 0.174379  | 6.093086 | L          |
| O-O--0.567900  | 0  | -1.606223 | -0.627358 | 6.995820 | L          |
| C-CT-0.130300  | 0  | -2.996620 | 2.108242  | 7.292599 | L          |
| C-CT--0.043000 | 0  | -4.251072 | 3.003614  | 7.450502 | L          |
| C-CT--0.320400 | 0  | -1.751474 | 2.984416  | 7.085938 | L          |
| C-CT--0.066000 | 0  | -4.652310 | 3.823738  | 6.215141 | L          |
| H-H-0.271900   | 0  | -4.355917 | -0.252031 | 7.256496 | L          |
| H-H1-0.086900  | 0  | -3.212243 | 1.588514  | 5.231152 | L          |
| H-HC-0.018700  | 0  | -2.866364 | 1.579495  | 8.238783 | L          |
| H-HC-0.023600  | 0  | -4.079015 | 3.696805  | 8.274658 | L          |
| H-HC-0.023600  | 0  | -5.098461 | 2.382252  | 7.738751 | L          |
| H-HC-0.088200  | 0  | -1.733387 | 3.364108  | 6.064312 | L          |
| H-HC-0.088200  | 0  | -0.853710 | 2.387615  | 7.249784 | L          |
| H-HC-0.088200  | 0  | -1.746976 | 3.814357  | 7.791403 | L          |
| H-HC-0.018600  | 0  | -3.845414 | 4.493522  | 5.922860 | L          |
| H-HC-0.018600  | 0  | -5.534483 | 4.419418  | 6.450064 | L          |
| H-HC-0.018600  | 0  | -4.893113 | 3.165973  | 5.383196 | L          |
| N-N--0.516300  | 0  | -1.112960 | 0.351862  | 5.011224 | L          |
| C-CT-0.038100  | -1 | 0.184829  | -0.232951 | 4.733251 | L H-HC 178 |
| C-C-0.536600   | 0  | 1.116088  | -0.077808 | 5.941968 | L          |
| O-O--0.581900  | 0  | 1.326611  | 1.015755  | 6.462481 | L          |
| C-CT--0.520019 | 0  | 0.703850  | 0.419352  | 3.438063 | H          |
| C-C-0.636404   | 0  | 0.969668  | -0.532456 | 2.282932 | H          |
| O-O2--0.608036 | 0  | 0.350499  | -1.634992 | 2.196083 | H          |
| O-O2--0.608131 | 0  | 1.822097  | -0.100979 | 1.444190 | H          |
| H-H-0.293600   | 0  | -1.516138 | 0.931424  | 4.281314 | L          |
| H-H1-0.088000  | 0  | 0.032628  | -1.300753 | 4.568445 | L          |
| H-HC-0.132300  | 0  | 1.634146  | 0.951256  | 3.649104 | H          |
| H-HC-0.188993  | 0  | -0.005053 | 1.169725  | 3.076911 | H          |
| N-N--0.415700  | 0  | 1.662456  | -1.189211 | 6.402918 | L          |
| C-CT-0.033700  | -1 | 2.569464  | -1.235423 | 7.526837 | L          |
| C-C-0.597300   | 0  | 3.789423  | -2.055232 | 7.122473 | L          |

|                |    |           |            |           |            |
|----------------|----|-----------|------------|-----------|------------|
| O-O--0.567900  | 0  | 3.838362  | -3.281155  | 7.272776  | L          |
| C-CT--0.182500 | 0  | 1.820365  | -1.794647  | 8.744631  | L          |
| H-H-0.271900   | 0  | 1.360230  | -2.067372  | 5.995852  | L          |
| H-H1-0.082300  | 0  | 2.914492  | -0.230061  | 7.776128  | L          |
| H-HC-0.060300  | 0  | 0.980790  | -1.141177  | 8.985019  | L          |
| H-HC-0.060300  | 0  | 2.495833  | -1.843998  | 9.598403  | L          |
| H-HC-0.060300  | 0  | 1.444125  | -2.794695  | 8.523141  | L          |
| N-N--0.415700  | 0  | 4.759737  | -1.358911  | 6.542944  | L          |
| C-CT-0.018800  | -1 | 5.965534  | -1.940352  | 5.997541  | L H-HC 200 |
| C-C-0.597300   | 0  | 7.161492  | -1.793349  | 6.947474  | L          |
| O-O--0.567900  | 0  | 7.208447  | -0.942030  | 7.837772  | L          |
| C-CT--0.517456 | 0  | 6.222159  | -1.299271  | 4.631458  | H          |
| C-CM-0.287351  | 0  | 5.352558  | -1.775793  | 3.526731  | H          |
| N-N2--0.586994 | 0  | 5.494959  | -3.030246  | 2.950150  | H          |
| C-CM--0.020338 | 0  | 4.374199  | -1.167037  | 2.791223  | H          |
| C-CM-0.242458  | 0  | 4.628532  | -3.119759  | 1.905969  | H          |
| N-N2--0.505070 | 0  | 3.939892  | -2.000593  | 1.780885  | H          |
| H-H-0.271900   | 0  | 4.655611  | -0.349471  | 6.487946  | L          |
| H-H1-0.088100  | 0  | 5.819458  | -3.006370  | 5.853960  | L          |
| H-HC-0.166355  | 0  | 7.277229  | -1.465403  | 4.368590  | H          |
| H-HC-0.174481  | 0  | 6.109632  | -0.220744  | 4.768945  | H          |
| H-H-0.335795   | 0  | 6.143131  | -3.747522  | 3.268339  | H          |
| H-H4-0.152777  | 0  | 3.974824  | -0.171501  | 2.912935  | H          |
| H-H5-0.209475  | 0  | 4.529225  | -3.985440  | 1.265906  | H          |
| N-N--0.415700  | 0  | 8.166325  | -2.631974  | 6.701244  | L          |
| C-CT--0.149000 | -1 | 9.436867  | -2.558916  | 7.389561  | L          |
| H-H-0.271900   | 0  | 8.015028  | -3.310557  | 5.961644  | L          |
| H-H1-0.097600  | 0  | 10.110225 | -3.327946  | 7.009826  | L          |
| H-H1-0.097600  | 0  | 9.281471  | -2.706047  | 8.459771  | L          |
| H-H1-0.097600  | 0  | 9.882554  | -1.575289  | 7.230560  | L          |
| C-CT--0.366200 | -1 | 8.364488  | -9.375785  | 0.926514  | L          |
| C-C-0.597200   | 0  | 8.735466  | -9.134628  | -0.524200 | L          |
| O-O--0.567900  | 0  | 9.755060  | -8.507141  | -0.783512 | L          |
| H-HC-0.112300  | 0  | 8.303028  | -10.444124 | 1.120075  | L          |
| H-HC-0.112300  | 0  | 7.417232  | -8.886962  | 1.146673  | L          |
| H-HC-0.112300  | 0  | 9.137552  | -8.936976  | 1.557262  | L          |
| N-N--0.254800  | 0  | 7.924244  | -9.604715  | -1.488292 | L          |
| C-CT--0.026600 | -1 | 8.165651  | -9.365997  | -2.913492 | L          |
| C-C-0.589600   | 0  | 8.011369  | -7.894039  | -3.297096 | L          |
| O-O--0.574800  | 0  | 8.717896  | -7.397341  | -4.171173 | L          |
| C-CT--0.007000 | 0  | 7.163901  | -10.264639 | -3.646413 | L          |
| C-CT-0.018900  | 0  | 6.007137  | -10.402036 | -2.655327 | L          |
| C-CT-0.019200  | 0  | 6.702710  | -10.374146 | -1.293630 | L          |
| H-H1-0.064100  | 0  | 9.179614  | -9.672596  | -3.173580 | L          |
| H-HC-0.025300  | 0  | 7.614722  | -11.244110 | -3.813147 | L          |
| H-HC-0.025300  | 0  | 6.837570  | -9.833640  | -4.594213 | L          |
| H-HC-0.021300  | 0  | 5.452599  | -11.328706 | -2.806162 | L          |
| H-HC-0.021300  | 0  | 5.342405  | -9.541370  | -2.744707 | L          |
| H-H1-0.039100  | 0  | 6.051170  | -9.912909  | -0.550087 | L          |
| H-H1-0.039100  | 0  | 6.960685  | -11.389730 | -0.990372 | L          |
| N-N--0.516300  | 0  | 7.090261  | -7.198052  | -2.630069 | L          |
| C-CT-0.039700  | -1 | 6.838970  | -5.770818  | -2.800802 | L          |
| C-C-0.536600   | 0  | 8.099273  | -4.907328  | -2.670685 | L          |
| O-O--0.581900  | 0  | 8.273091  | -3.922300  | -3.391955 | L          |

|                |    |           |           |           |            |
|----------------|----|-----------|-----------|-----------|------------|
| C-CT-0.056000  | 0  | 5.742196  | -5.334302 | -1.825819 | L H-HC 244 |
| C-CT--0.515956 | 0  | 5.216485  | -3.946880 | -2.202492 | H          |
| C-C-0.587828   | 0  | 4.131650  | -3.408636 | -1.280112 | H          |
| O-O2--0.600319 | 0  | 4.073907  | -2.127372 | -1.246748 | H          |
| O-O2--0.589127 | 0  | 3.382721  | -4.198097 | -0.659230 | H          |
| H-H-0.293600   | 0  | 6.561961  | -7.674491 | -1.918266 | L          |
| H-H1-0.110500  | 0  | 6.463610  | -5.616334 | -3.812776 | L          |
| H-HC--0.017300 | 0  | 6.137032  | -5.318090 | -0.808782 | L          |
| H-HC--0.017300 | 0  | 4.917539  | -6.047357 | -1.875411 | L          |
| H-HC-0.167759  | 0  | 4.807492  | -3.994472 | -3.218715 | H          |
| H-HC-0.135230  | 0  | 6.041334  | -3.226150 | -2.217644 | H          |
| N-N--0.415700  | 0  | 9.009949  | -5.313721 | -1.788457 | L          |
| C-CT--0.024900 | -1 | 10.246699 | -4.608946 | -1.471826 | L          |
| C-C-0.597300   | 0  | 11.266773 | -4.493362 | -2.597600 | L          |
| O-O--0.567900  | 0  | 12.242132 | -3.753860 | -2.465883 | L          |
| C-CT-0.211700  | 0  | 10.889817 | -5.242807 | -0.232317 | L          |
| O-OH--0.654600 | 0  | 9.934918  | -5.430223 | 0.801840  | L          |
| H-H-0.271900   | 0  | 8.804214  | -6.125976 | -1.223094 | L          |
| H-H1-0.084300  | 0  | 9.976738  | -3.586063 | -1.204956 | L          |
| H-H1-0.035200  | 0  | 11.689493 | -4.594039 | 0.128052  | L          |
| H-H1-0.035200  | 0  | 11.315674 | -6.211275 | -0.498931 | L          |
| H-HO-0.427500  | 0  | 9.378426  | -4.623091 | 0.874743  | L          |
| N-N--0.415700  | 0  | 11.029985 | -5.180048 | -3.713551 | L          |
| C-CT-0.033700  | -1 | 11.779314 | -5.015558 | -4.952269 | L          |
| C-C-0.597300   | 0  | 10.954046 | -4.440759 | -6.107552 | L          |
| O-O--0.567900  | 0  | 11.395376 | -4.432477 | -7.255806 | L          |
| C-CT--0.182500 | 0  | 12.389076 | -6.381696 | -5.298683 | L          |
| H-H-0.271900   | 0  | 10.219653 | -5.789065 | -3.719867 | L          |
| H-H1-0.082300  | 0  | 12.604145 | -4.319552 | -4.793499 | L          |
| H-HC-0.060300  | 0  | 13.002602 | -6.733952 | -4.468720 | L          |
| H-HC-0.060300  | 0  | 13.015160 | -6.291007 | -6.187009 | L          |
| H-HC-0.060300  | 0  | 11.593971 | -7.103283 | -5.493271 | L          |
| N-N--0.415700  | 0  | 9.769983  | -3.933159 | -5.783477 | L          |
| C-CT--0.025200 | -1 | 8.863324  | -3.259657 | -6.690210 | L          |
| C-C-0.597300   | 0  | 8.787733  | -1.757486 | -6.467759 | L          |
| O-O--0.567900  | 0  | 8.768751  | -0.984565 | -7.422916 | L          |
| H-H-0.271900   | 0  | 9.484894  | -4.003713 | -4.812886 | L          |
| H-H1-0.069800  | 0  | 7.862112  | -3.667823 | -6.555889 | L          |
| H-H1-0.069800  | 0  | 9.162716  | -3.434877 | -7.724030 | L          |
| N-N--0.415700  | 0  | 8.743598  | -1.351835 | -5.202043 | L          |
| C-CT--0.002400 | -1 | 8.579304  | 0.033716  | -4.781589 | L          |
| C-C-0.597300   | 0  | 9.698559  | 0.466235  | -3.827498 | L          |
| O-O--0.567900  | 0  | 10.321920 | -0.385922 | -3.186451 | L          |
| C-CT--0.034300 | 0  | 7.197865  | 0.164160  | -4.114253 | L          |
| C-CA-0.011800  | 0  | 6.038483  | -0.057354 | -5.067670 | L          |
| C-CA--0.125600 | 0  | 5.683994  | 0.946274  | -5.988990 | L          |
| C-CA--0.125600 | 0  | 5.334981  | -1.276287 | -5.061316 | L          |
| C-CA--0.170400 | 0  | 4.638178  | 0.729804  | -6.904336 | L          |
| C-CA--0.170400 | 0  | 4.287218  | -1.491535 | -5.974147 | L          |
| C-CA--0.107200 | 0  | 3.943298  | -0.492537 | -6.901338 | L          |
| H-H-0.271900   | 0  | 8.770362  | -2.058209 | -4.476055 | L          |
| H-H1-0.097800  | 0  | 8.608270  | 0.684391  | -5.655662 | L          |
| H-HC-0.029500  | 0  | 7.090189  | 1.154851  | -3.673532 | L          |
| H-HC-0.029500  | 0  | 7.136287  | -0.555103 | -3.295802 | L          |

|                |    |           |           |           |            |
|----------------|----|-----------|-----------|-----------|------------|
| H-HA-0.133000  | 0  | 6.223742  | 1.881733  | -6.003771 | L          |
| H-HA-0.133000  | 0  | 5.605481  | -2.052962 | -4.361456 | L          |
| H-HA-0.143000  | 0  | 4.371816  | 1.501459  | -7.612628 | L          |
| H-HA-0.143000  | 0  | 3.745697  | -2.426143 | -5.964359 | L          |
| H-HA-0.129700  | 0  | 3.137935  | -0.661533 | -7.602512 | L          |
| N-N--0.254800  | 0  | 9.954497  | 1.779893  | -3.681649 | L          |
| C-CT--0.026600 | -1 | 10.815649 | 2.274090  | -2.613328 | L          |
| C-C-0.589600   | 0  | 10.180773 | 2.022866  | -1.236856 | L          |
| O-O--0.574800  | 0  | 8.985961  | 1.717615  | -1.159526 | L          |
| C-CT--0.007000 | 0  | 10.973839 | 3.774268  | -2.894130 | L          |
| C-CT-0.018900  | 0  | 9.657762  | 4.142483  | -3.576944 | L          |
| C-CT-0.019200  | 0  | 9.351143  | 2.895205  | -4.405707 | L          |
| H-H1-0.064100  | 0  | 11.786021 | 1.781607  | -2.668331 | L          |
| H-HC-0.025300  | 0  | 11.799911 | 3.929131  | -3.589715 | L          |
| H-HC-0.025300  | 0  | 11.129474 | 4.357834  | -1.985413 | L          |
| H-HC-0.021300  | 0  | 9.756041  | 5.031871  | -4.200161 | L          |
| H-HC-0.021300  | 0  | 8.879532  | 4.286284  | -2.824733 | L          |
| H-H1-0.039100  | 0  | 8.273236  | 2.786423  | -4.516399 | L          |
| H-H1-0.039100  | 0  | 9.819756  | 2.981992  | -5.386837 | L          |
| N-N--0.254800  | 0  | 10.946281 | 2.135954  | -0.140904 | L          |
| C-CT--0.026600 | -1 | 10.393185 | 2.126739  | 1.206457  | L          |
| C-C-0.589600   | 0  | 9.337847  | 3.209449  | 1.434399  | L          |
| O-O--0.574800  | 0  | 9.593357  | 4.388687  | 1.201375  | L          |
| C-CT--0.007000 | 0  | 11.592139 | 2.318027  | 2.146053  | L          |
| C-CT-0.018900  | 0  | 12.780061 | 1.829528  | 1.320752  | L          |
| C-CT-0.019200  | 0  | 12.396133 | 2.240176  | -0.097925 | L          |
| H-H1-0.064100  | 0  | 9.955080  | 1.144553  | 1.389858  | L          |
| H-HC-0.025300  | 0  | 11.476435 | 1.742918  | 3.065285  | L          |
| H-HC-0.025300  | 0  | 11.732383 | 3.375612  | 2.377175  | L          |
| H-HC-0.021300  | 0  | 12.846264 | 0.741794  | 1.380125  | L          |
| H-HC-0.021300  | 0  | 13.714875 | 2.292251  | 1.638086  | L          |
| H-H1-0.039100  | 0  | 12.692644 | 3.274119  | -0.279539 | L          |
| H-H1-0.039100  | 0  | 12.873351 | 1.571846  | -0.815471 | L          |
| N-N--0.415700  | 0  | 8.171093  | 2.784581  | 1.909392  | L          |
| C-CT-0.018800  | -1 | 7.015075  | 3.613582  | 2.204623  | L H-HC 334 |
| C-C-0.597300   | 0  | 6.153944  | 3.024595  | 3.318853  | L          |
| O-O--0.567900  | 0  | 6.156359  | 1.813171  | 3.536266  | L          |
| C-CT--0.515368 | 0  | 6.191656  | 3.733445  | 0.893923  | H          |
| C-CM-0.287903  | 0  | 5.593136  | 2.456682  | 0.382063  | H          |
| N-N2--0.582625 | 0  | 6.224909  | 1.661378  | -0.560646 | H          |
| C-CM--0.036893 | 0  | 4.464095  | 1.742919  | 0.713102  | H          |
| C-CM-0.243454  | 0  | 5.488633  | 0.537604  | -0.755417 | H          |
| N-N2--0.523998 | 0  | 4.417301  | 0.551222  | 0.015812  | H          |
| H-H-0.271900   | 0  | 8.036616  | 1.787720  | 1.999969  | L          |
| H-H1-0.088100  | 0  | 7.350681  | 4.608135  | 2.513825  | L          |
| H-HC-0.162301  | 0  | 6.846085  | 4.187595  | 0.135572  | H          |
| H-HC-0.188340  | 0  | 5.398584  | 4.469080  | 1.076537  | H          |
| H-H-0.339448   | 0  | 7.134911  | 1.862743  | -0.974710 | H          |
| H-H4-0.185957  | 0  | 3.685536  | 2.009086  | 1.413349  | H          |
| H-H5-0.211295  | 0  | 5.763079  | -0.258567 | -1.432148 | H          |
| N-N--0.415700  | 0  | 5.392616  | 3.891015  | 3.975848  | L          |
| C-CT-0.014300  | -1 | 4.550549  | 3.597335  | 5.126395  | L          |
| C-C-0.597300   | 0  | 5.203342  | 2.648399  | 6.142724  | L          |
| O-O--0.567900  | 0  | 4.682103  | 1.594508  | 6.511028  | L          |

|                |    |           |           |           |            |
|----------------|----|-----------|-----------|-----------|------------|
| C-CT--0.204100 | 0  | 3.102049  | 3.314584  | 4.702144  | L          |
| C-C-0.713000   | 0  | 2.161896  | 4.197446  | 5.501551  | L          |
| N-N--0.919100  | 0  | 1.574258  | 3.713672  | 6.560804  | L          |
| O-O--0.593100  | 0  | 1.975961  | 5.367858  | 5.216341  | L          |
| H-H-0.271900   | 0  | 5.537755  | 4.879521  | 3.761686  | L          |
| H-H1-0.104800  | 0  | 4.514843  | 4.550788  | 5.658456  | L          |
| H-HC-0.079700  | 0  | 2.868775  | 2.266953  | 4.859107  | L          |
| H-HC-0.079700  | 0  | 2.959209  | 3.550254  | 3.647870  | L          |
| H-H-0.419600   | 0  | 0.915852  | 4.295213  | 7.032415  | L          |
| H-H-0.419600   | 0  | 1.625208  | 2.705001  | 6.705513  | L          |
| N-N--0.415700  | 0  | 6.389137  | 3.081450  | 6.583642  | L          |
| C-CT--0.149000 | -1 | 7.296197  | 2.337875  | 7.436248  | L          |
| H-H-0.271900   | 0  | 6.700451  | 3.956536  | 6.185421  | L          |
| H-H1-0.097600  | 0  | 8.050230  | 3.002182  | 7.858051  | L          |
| H-H1-0.097600  | 0  | 7.784214  | 1.553935  | 6.853969  | L          |
| H-H1-0.097600  | 0  | 6.738340  | 1.859744  | 8.244591  | L          |
| C-CT--0.366200 | -1 | -2.248192 | -2.739250 | 9.546015  | L          |
| C-C-0.597200   | 0  | -2.371451 | -3.830879 | 8.518773  | L          |
| O-O--0.567900  | 0  | -2.918016 | -4.891539 | 8.809233  | L          |
| H-HC-0.112300  | 0  | -1.194331 | -2.523172 | 9.710779  | L          |
| H-HC-0.112300  | 0  | -2.708537 | -3.070014 | 10.474616 | L          |
| H-HC-0.112300  | 0  | -2.752393 | -1.846645 | 9.180481  | L          |
| N-N--0.347900  | 0  | -1.837615 | -3.572855 | 7.328410  | L          |
| C-CT--0.240000 | -1 | -1.740910 | -4.536939 | 6.226419  | L          |
| C-C-0.734100   | 0  | -0.329485 | -4.575428 | 5.651806  | L          |
| O-O--0.589400  | 0  | 0.494030  | -3.706429 | 5.924014  | L          |
| C-CT--0.009400 | 0  | -2.830214 | -4.220990 | 5.176800  | L          |
| C-CT-0.018700  | 0  | -2.561250 | -2.976538 | 4.314041  | L H-HC 379 |
| C-CT--0.464524 | 0  | -3.688954 | -2.761172 | 3.293605  | H          |
| C-CT--0.195159 | 0  | -3.488172 | -1.614573 | 2.303598  | H          |
| N-N3--0.748751 | 0  | -2.327613 | -1.856512 | 1.379614  | H          |
| H-H-0.274700   | 0  | -1.441109 | -2.645394 | 7.191622  | L          |
| H-H1-0.142600  | 0  | -1.941016 | -5.532617 | 6.622636  | L          |
| H-HC-0.036200  | 0  | -3.786130 | -4.096642 | 5.688591  | L          |
| H-HC-0.036200  | 0  | -2.934664 | -5.073187 | 4.512682  | L          |
| H-HC-0.010300  | 0  | -1.617054 | -3.099410 | 3.783413  | L          |
| H-HC-0.010300  | 0  | -2.499896 | -2.103894 | 4.954804  | L          |
| H-HC-0.173903  | 0  | -4.618157 | -2.576192 | 3.840543  | H          |
| H-HC-0.148535  | 0  | -3.833997 | -3.696074 | 2.731455  | H          |
| H-HP-0.236066  | 0  | -3.332629 | -0.645062 | 2.775253  | H          |
| H-HP-0.172509  | 0  | -4.366693 | -1.550917 | 1.649746  | H          |
| H-H-0.437293   | 0  | -2.416518 | -1.304910 | 0.464299  | H          |
| H-H-0.366736   | 0  | -2.360607 | -2.841836 | 1.088092  | H          |
| H-H-0.419451   | 0  | -1.390086 | -1.667063 | 1.799002  | H          |
| N-N--0.415700  | 0  | -0.037494 | -5.600416 | 4.864350  | L          |
| C-CT--0.025200 | -1 | 1.281258  | -5.802043 | 4.272837  | L          |
| C-C-0.597300   | 0  | 1.162899  | -6.543826 | 2.939266  | L          |
| O-O--0.567900  | 0  | 1.728233  | -7.615405 | 2.733131  | L          |
| H-H-0.271900   | 0  | -0.784490 | -6.244206 | 4.622639  | L          |
| H-H1-0.069800  | 0  | 1.902455  | -6.388899 | 4.949594  | L          |
| H-H1-0.069800  | 0  | 1.768286  | -4.843525 | 4.089703  | L          |
| N-N--0.415700  | 0  | 0.369162  | -5.954188 | 2.051645  | L          |
| C-CT--0.025200 | -1 | -0.228601 | -6.534940 | 0.851923  | L          |
| C-C-0.597300   | 0  | -1.312086 | -5.567529 | 0.416788  | L          |

|                |    |           |            |           |   |
|----------------|----|-----------|------------|-----------|---|
| O-O--0.567900  | 0  | -2.092719 | -5.113066  | 1.248914  | L |
| H-H-0.271900   | 0  | -0.058942 | -5.096088  | 2.374851  | L |
| H-H1-0.069800  | 0  | -0.673548 | -7.501742  | 1.086765  | L |
| H-H1-0.069800  | 0  | 0.528582  | -6.642355  | 0.074915  | L |
| N-N--0.415700  | 0  | -1.339640 | -5.210692  | -0.863268 | L |
| C-CT--0.001400 | -1 | -2.156369 | -4.103294  | -1.360771 | L |
| C-C-0.597300   | 0  | -3.631880 | -4.188767  | -0.948028 | L |
| O-O--0.567900  | 0  | -4.233326 | -3.214521  | -0.512872 | L |
| C-CT--0.015200 | 0  | -2.046890 | -4.044528  | -2.898074 | L |
| C-CA--0.001100 | 0  | -0.657742 | -4.250027  | -3.476828 | L |
| C-CA--0.190600 | 0  | 0.369902  | -3.327341  | -3.203784 | L |
| C-CA--0.190600 | 0  | -0.398253 | -5.366282  | -4.297626 | L |
| C-CA--0.234100 | 0  | 1.655446  | -3.522610  | -3.743688 | L |
| C-CA--0.234100 | 0  | 0.885495  | -5.564016  | -4.840674 | L |
| C-C-0.322600   | 0  | 1.916548  | -4.640188  | -4.562420 | L |
| O-OH--0.557900 | 0  | 3.151530  | -4.829252  | -5.098219 | L |
| H-H-0.271900   | 0  | -0.594691 | -5.528253  | -1.466475 | L |
| H-H1-0.087600  | 0  | -1.740277 | -3.183313  | -0.957347 | L |
| H-HC-0.029500  | 0  | -2.409431 | -3.077304  | -3.238618 | L |
| H-HC-0.029500  | 0  | -2.711116 | -4.795855  | -3.326377 | L |
| H-HA-0.169900  | 0  | 0.178456  | -2.460777  | -2.581084 | L |
| H-HA-0.169900  | 0  | -1.191877 | -6.061754  | -4.529297 | L |
| H-HA-0.165600  | 0  | 2.443649  | -2.816779  | -3.529514 | L |
| H-HA-0.165600  | 0  | 1.076607  | -6.412175  | -5.477672 | L |
| H-HO-0.399200  | 0  | 3.165044  | -5.593452  | -5.672275 | L |
| N-N--0.415700  | 0  | -4.210570 | -5.383186  | -1.067177 | L |
| C-CT--0.024900 | -1 | -5.555779 | -5.648001  | -0.576858 | L |
| C-C-0.597300   | 0  | -5.675058 | -5.543580  | 0.940953  | L |
| O-O--0.567900  | 0  | -4.989490 | -6.249532  | 1.689823  | L |
| C-CT-0.211700  | 0  | -6.012753 | -7.049174  | -0.986437 | L |
| O-OH--0.654600 | -1 | -7.274872 | -7.349388  | -0.413657 | L |
| H-H-0.271900   | 0  | -3.626850 | -6.137376  | -1.381526 | L |
| H-H1-0.084300  | 0  | -6.236817 | -4.927902  | -1.031290 | L |
| H-H1-0.035200  | 0  | -5.283494 | -7.781297  | -0.637623 | L |
| H-H1-0.035200  | 0  | -6.077617 | -7.105558  | -2.073222 | L |
| H-HO-0.427500  | -1 | -7.531849 | -8.222209  | -0.720970 | L |
| N-N--0.415700  | 0  | -6.668907 | -4.766541  | 1.365566  | L |
| C-CT-0.033700  | -1 | -7.153581 | -4.672750  | 2.731221  | L |
| C-C-0.597300   | 0  | -7.451245 | -6.015097  | 3.405470  | L |
| O-O--0.567900  | 0  | -7.253315 | -6.162853  | 4.609181  | L |
| C-CT--0.182500 | 0  | -8.382527 | -3.763250  | 2.737819  | L |
| H-H-0.271900   | 0  | -7.153407 | -4.211664  | 0.666373  | L |
| H-H1-0.082300  | 0  | -6.377987 | -4.190101  | 3.326898  | L |
| H-HC-0.060300  | 0  | -8.131963 | -2.786018  | 2.320813  | L |
| H-HC-0.060300  | 0  | -8.730038 | -3.636881  | 3.758605  | L |
| H-HC-0.060300  | 0  | -9.180789 | -4.217422  | 2.156355  | L |
| N-N--0.415700  | 0  | -7.935804 | -6.991023  | 2.636461  | L |
| C-CT--0.025200 | -1 | -8.276315 | -8.318858  | 3.134519  | L |
| C-C-0.597300   | 0  | -7.324040 | -9.412419  | 2.659870  | L |
| O-O--0.567900  | 0  | -7.756439 | -10.524786 | 2.367664  | L |
| H-H-0.271900   | 0  | -8.007403 | -6.796406  | 1.644632  | L |
| H-H1-0.069800  | 0  | -9.278132 | -8.573372  | 2.789574  | L |
| H-H1-0.069800  | 0  | -8.288356 | -8.331416  | 4.224722  | L |
| N-N--0.415700  | 0  | -6.024008 | -9.120500  | 2.639405  | L |

|                |    |            |            |           |            |
|----------------|----|------------|------------|-----------|------------|
| C-CT--0.024900 | -1 | -4.958774  | -10.125458 | 2.612023  | L          |
| C-C-0.597300   | 0  | -4.231126  | -10.092667 | 3.950649  | L          |
| O-O--0.567900  | 0  | -3.900538  | -9.017523  | 4.460584  | L          |
| C-CT-0.211700  | 0  | -3.992066  | -9.848616  | 1.456930  | L          |
| O-OH--0.654600 | -1 | -3.079693  | -10.924915 | 1.294092  | L          |
| H-H-0.271900   | 0  | -5.765877  | -8.166493  | 2.869137  | L          |
| H-H1-0.084300  | 0  | -5.386725  | -11.116832 | 2.462629  | L          |
| H-H1-0.035200  | 0  | -3.446461  | -8.922364  | 1.645750  | L          |
| H-H1-0.035200  | 0  | -4.567323  | -9.735371  | 0.537232  | L          |
| H-HO-0.427500  | -1 | -2.539365  | -10.736305 | 0.523299  | L          |
| N-N--0.415700  | 0  | -4.037695  | -11.268695 | 4.547238  | L          |
| C-CT--0.149000 | -1 | -3.520988  | -11.409919 | 5.898288  | L          |
| H-H-0.271900   | 0  | -4.319002  | -12.089629 | 4.035133  | L          |
| H-H1-0.097600  | 0  | -3.300345  | -12.455696 | 6.112513  | L          |
| H-H1-0.097600  | 0  | -4.255513  | -11.041439 | 6.617786  | L          |
| H-H1-0.097600  | 0  | -2.606776  | -10.822123 | 6.011027  | L          |
| C-CT--0.366200 | -1 | -12.145036 | 5.078349   | -0.643971 | L          |
| C-C-0.597200   | 0  | -10.716096 | 5.258676   | -0.203707 | L          |
| O-O--0.567900  | 0  | -10.398563 | 4.986476   | 0.948651  | L          |
| H-HC-0.112300  | 0  | -12.538432 | 6.032196   | -0.988594 | L          |
| H-HC-0.112300  | 0  | -12.731279 | 4.724295   | 0.202453  | L          |
| H-HC-0.112300  | 0  | -12.180272 | 4.340238   | -1.443165 | L          |
| N-N--0.415700  | 0  | -9.867146  | 5.706537   | -1.124081 | L          |
| C-CT--0.025200 | -1 | -8.433918  | 5.871901   | -0.897265 | L          |
| C-C-0.597300   | 0  | -7.619452  | 5.743782   | -2.160546 | L          |
| O-O--0.567900  | 0  | -8.127450  | 6.034625   | -3.249823 | L          |
| H-H-0.271900   | 0  | -10.181949 | 5.870583   | -2.068094 | L          |
| H-H1-0.069800  | 0  | -8.120064  | 5.093394   | -0.212090 | L          |
| H-H1-0.069800  | 0  | -8.233616  | 6.842779   | -0.446310 | L          |
| N-N--0.415700  | 0  | -6.360930  | 5.333095   | -1.985551 | L H-H1 489 |
| C-CT--0.530209 | -1 | -5.349486  | 5.299088   | -3.042549 | H          |
| C-C-0.568093   | 0  | -4.526347  | 4.034559   | -2.924880 | H          |
| O-O--0.528105  | 0  | -4.334470  | 3.502378   | -1.817056 | H          |
| C-CT-0.298500  | 0  | -4.463181  | 6.568521   | -3.004824 | L H-H1 489 |
| C-CT--0.319200 | 0  | -5.266993  | 7.812665   | -3.387742 | L          |
| C-CT--0.319200 | 0  | -3.798121  | 6.799487   | -1.644231 | L          |
| H-H-0.271900   | 0  | -6.065798  | 5.059935   | -1.049655 | L          |
| H-H1-0.184096  | 0  | -5.876598  | 5.311870   | -4.002832 | H          |
| H-HC--0.029700 | 0  | -3.674268  | 6.457205   | -3.747781 | L          |
| H-HC-0.079100  | 0  | -6.012962  | 8.026505   | -2.624090 | L          |
| H-HC-0.079100  | 0  | -5.765897  | 7.645102   | -4.341216 | L          |
| H-HC-0.079100  | 0  | -4.594215  | 8.664357   | -3.479359 | L          |
| H-HC-0.079100  | 0  | -4.548629  | 6.941444   | -0.868143 | L          |
| H-HC-0.079100  | 0  | -3.159453  | 7.680053   | -1.689765 | L          |
| H-HC-0.079100  | 0  | -3.184032  | 5.938691   | -1.379393 | L          |
| N-N--0.610103  | 0  | -3.979682  | 3.558824   | -4.057733 | H          |
| C-CT--0.314060 | -1 | -4.236772  | 4.007648   | -5.419350 | H          |
| C-C-0.597300   | 0  | -5.356194  | 3.189004   | -6.046860 | L H-H1 505 |
| O-O--0.567900  | 0  | -5.488196  | 1.987150   | -5.817410 | L          |
| C-CT--0.110200 | 0  | -2.941112  | 3.883469   | -6.257314 | L H-H1 505 |
| C-CT-0.353100  | 0  | -1.874592  | 4.970114   | -5.979928 | L          |
| C-CT--0.412100 | 0  | -1.078821  | 4.766291   | -4.687216 | L          |
| C-CT--0.412100 | 0  | -0.862105  | 4.997914   | -7.128666 | L          |
| H-H-0.398207   | 0  | -3.436617  | 2.697036   | -3.951374 | H          |

|                |    |            |           |            |            |
|----------------|----|------------|-----------|------------|------------|
| H-H1-0.165130  | 0  | -4.531922  | 5.056138  | -5.426930  | H          |
| H-HC-0.045700  | 0  | -3.225171  | 3.962602  | -7.306982  | L          |
| H-HC-0.045700  | 0  | -2.501794  | 2.895965  | -6.114840  | L          |
| H-HC--0.036100 | 0  | -2.362385  | 5.944750  | -5.944562  | L          |
| H-HC-0.100000  | 0  | -0.622119  | 3.778512  | -4.682785  | L          |
| H-HC-0.100000  | 0  | -1.741396  | 4.854944  | -3.828032  | L          |
| H-HC-0.100000  | 0  | -0.307474  | 5.530097  | -4.597793  | L          |
| H-HC-0.100000  | 0  | -0.344124  | 4.042030  | -7.189111  | L          |
| H-HC-0.100000  | 0  | -0.134190  | 5.790595  | -6.955771  | L          |
| H-HC-0.100000  | 0  | -1.374932  | 5.194325  | -8.068873  | L          |
| N-N--0.415700  | 0  | -6.141034  | 3.835787  | -6.904142  | L          |
| C-CT--0.038900 | -1 | -7.328026  | 3.237261  | -7.527598  | L          |
| C-C-0.597300   | 0  | -7.077114  | 1.899136  | -8.211368  | L          |
| O-O--0.567900  | 0  | -7.947572  | 1.031896  | -8.232641  | L          |
| C-CT-0.365400  | -1 | -7.966094  | 4.161654  | -8.588887  | L          |
| O-OH--0.676100 | -1 | -7.905178  | 5.518738  | -8.140490  | L          |
| C-CT--0.243800 | 0  | -9.443305  | 3.866596  | -8.847328  | L          |
| H-H-0.271900   | 0  | -6.016078  | 4.832601  | -7.002328  | L          |
| H-H1-0.100700  | 0  | -8.069143  | 3.095758  | -6.747735  | L          |
| H-H1-0.004300  | 0  | -7.410854  | 4.085933  | -9.524796  | L          |
| H-HC-0.064200  | 0  | -9.555699  | 2.860293  | -9.250767  | L          |
| H-HC-0.064200  | 0  | -9.838817  | 4.576032  | -9.574087  | L          |
| H-HC-0.064200  | 0  | -10.008143 | 3.940753  | -7.917241  | L          |
| H-HO-0.410200  | -1 | -8.803585  | 5.853362  | -8.104729  | L          |
| N-N--0.415700  | 0  | -5.906159  | 1.770436  | -8.832515  | L          |
| C-CT--0.025200 | -1 | -5.519675  | 0.609863  | -9.622406  | L          |
| C-C-0.597300   | 0  | -4.590619  | -0.371039 | -8.939714  | L          |
| O-O--0.567900  | 0  | -4.066525  | -1.252767 | -9.620289  | L          |
| H-H-0.271900   | 0  | -5.228613  | 2.499872  | -8.671731  | L          |
| H-H1-0.069800  | 0  | -5.018340  | 0.954802  | -10.525628 | L          |
| H-H1-0.069800  | 0  | -6.406612  | 0.056419  | -9.931023  | L          |
| N-N--0.415700  | 0  | -4.384529  | -0.201556 | -7.629337  | L H-H1 545 |
| C-CT--0.539097 | -1 | -3.474835  | -1.000876 | -6.819310  | H          |
| C-C-0.572106   | 0  | -4.241436  | -1.432543 | -5.568086  | H          |
| O-O--0.533001  | 0  | -5.022184  | -2.377165 | -5.678584  | H          |
| C-CT-0.130300  | 0  | -2.102769  | -0.300348 | -6.627999  | L H-H1 545 |
| C-CT--0.043000 | 0  | -1.472767  | 0.157219  | -7.965284  | L          |
| C-CT--0.320400 | 0  | -1.181760  | -1.306444 | -5.915847  | L          |
| C-CT--0.066000 | 0  | -0.123738  | 0.874812  | -7.824444  | L          |
| H-H-0.271900   | 0  | -4.874496  | 0.551372  | -7.155300  | L          |
| H-H1-0.180646  | 0  | -3.287458  | -1.928860 | -7.370537  | H          |
| H-HC-0.018700  | 0  | -2.235153  | 0.577015  | -5.999119  | L          |
| H-HC-0.023600  | 0  | -2.148052  | 0.861336  | -8.449899  | L          |
| H-HC-0.023600  | 0  | -1.349795  | -0.704658 | -8.622361  | L          |
| H-HC-0.088200  | 0  | -1.061542  | -2.201872 | -6.524528  | L          |
| H-HC-0.088200  | 0  | -1.600891  | -1.586440 | -4.951442  | L          |
| H-HC-0.088200  | 0  | -0.205053  | -0.872136 | -5.722371  | L          |
| H-HC-0.018600  | 0  | -0.210368  | 1.683293  | -7.099900  | L          |
| H-HC-0.018600  | 0  | 0.163614   | 1.292284  | -8.789522  | L          |
| H-HC-0.018600  | 0  | 0.650605   | 0.177921  | -7.506076  | L          |
| N-N--0.611145  | 0  | -4.075776  | -0.699828 | -4.439643  | H          |
| C-CT--0.109296 | -1 | -4.638608  | -1.104405 | -3.157056  | H          |
| C-C-0.597300   | 0  | -6.166034  | -1.109288 | -3.155273  | L H-H1 564 |
| O-O--0.567900  | 0  | -6.800160  | -2.026087 | -2.621139  | L          |



|                |    |            |           |           |   |
|----------------|----|------------|-----------|-----------|---|
| C-CT--0.388038 | 0  | -4.075248  | -0.289104 | -1.999273 | H |
| H-H-0.369964   | 0  | -3.325793  | -0.018395 | -4.373129 | H |
| H-H1-0.178541  | 0  | -4.383390  | -2.152223 | -2.969159 | H |
| H-H1-0.157964  | 0  | -4.684815  | -0.549999 | -1.125335 | H |
| H-H1-0.179833  | 0  | -4.218138  | 0.782368  | -2.176767 | H |
| H-HS-0.319500  | 0  | -1.744959  | 1.521644  | 0.062925  | H |
| N-N--0.415700  | 0  | -6.755850  | -0.122790 | -3.818152 | L |
| C-CT--0.087500 | -1 | -8.196056  | -0.066342 | -4.052095 | L |
| C-C-0.597300   | 0  | -8.680346  | -1.218185 | -4.919194 | L |
| O-O--0.567900  | 0  | -9.613931  | -1.923064 | -4.537654 | L |
| C-CT-0.298500  | 0  | -8.606550  | 1.296107  | -4.628852 | L |
| C-CT--0.319200 | 0  | -10.124662 | 1.414319  | -4.819900 | L |
| C-CT--0.319200 | 0  | -8.166390  | 2.465283  | -3.733505 | L |
| H-H-0.271900   | 0  | -6.122461  | 0.542833  | -4.254054 | L |
| H-H1-0.096900  | 0  | -8.692911  | -0.172597 | -3.089781 | L |
| H-HC--0.029700 | 0  | -8.130738  | 1.394771  | -5.595813 | L |
| H-HC-0.079100  | 0  | -10.631806 | 1.254355  | -3.868083 | L |
| H-HC-0.079100  | 0  | -10.471028 | 0.675352  | -5.542313 | L |
| H-HC-0.079100  | 0  | -10.371641 | 2.405249  | -5.199926 | L |
| H-HC-0.079100  | 0  | -8.615768  | 2.380088  | -2.745547 | L |
| H-HC-0.079100  | 0  | -8.459307  | 3.413994  | -4.182331 | L |
| H-HC-0.079100  | 0  | -7.081566  | 2.476588  | -3.621355 | L |
| N-N--0.415700  | 0  | -8.051933  | -1.422593 | -6.075137 | L |
| C-CT--0.025200 | -1 | -8.405284  | -2.482628 | -7.015409 | L |
| C-C-0.597300   | 0  | -8.321549  | -3.883731 | -6.422404 | L |
| O-O--0.567900  | 0  | -9.222826  | -4.696904 | -6.613614 | L |
| H-H-0.271900   | 0  | -7.260649  | -0.827383 | -6.283641 | L |
| H-H1-0.069800  | 0  | -7.732672  | -2.434362 | -7.871495 | L |
| H-H1-0.069800  | 0  | -9.423614  | -2.320576 | -7.368317 | L |
| N-N--0.415700  | 0  | -7.238517  | -4.160183 | -5.699304 | L |
| C-CT--0.025200 | -1 | -7.009054  | -5.424952 | -5.012480 | L |
| C-C-0.597300   | 0  | -7.928598  | -5.685439 | -3.830259 | L |
| O-O--0.567900  | 0  | -8.242242  | -6.838886 | -3.542715 | L |
| H-H-0.271900   | 0  | -6.526698  | -3.434612 | -5.636501 | L |
| H-H1-0.069800  | 0  | -5.981858  | -5.444411 | -4.650325 | L |
| H-H1-0.069800  | 0  | -7.136045  | -6.241781 | -5.723200 | L |
| N-N--0.415700  | 0  | -8.329178  | -4.626236 | -3.130394 | L |
| C-CT--0.038900 | -1 | -9.379183  | -4.689362 | -2.111199 | L |
| C-C-0.597300   | 0  | -10.749078 | -4.983934 | -2.713194 | L |
| O-O--0.567900  | 0  | -11.491991 | -5.817795 | -2.195690 | L |
| C-CT-0.365400  | 0  | -9.421445  | -3.388692 | -1.294760 | L |
| O-OH--0.676100 | 0  | -8.185148  | -3.216809 | -0.640411 | L |
| C-CT--0.243800 | 0  | -10.506556 | -3.404830 | -0.218609 | L |
| H-H-0.271900   | 0  | -7.960922  | -3.718770 | -3.392491 | L |
| H-H1-0.100700  | 0  | -9.149604  | -5.505084 | -1.425692 | L |
| H-H1-0.004300  | 0  | -9.592318  | -2.537560 | -1.953998 | L |
| H-HC-0.064200  | 0  | -11.487006 | -3.293105 | -0.680413 | L |
| H-HC-0.064200  | 0  | -10.349741 | -2.579882 | 0.475836  | L |
| H-HC-0.064200  | 0  | -10.475587 | -4.348401 | 0.324145  | L |
| H-HO-0.410200  | 0  | -7.598757  | -2.754380 | -1.273804 | L |
| N-N--0.415700  | 0  | -11.098769 | -4.278467 | -3.789993 | L |
| C-CT--0.149000 | -1 | -12.332347 | -4.468360 | -4.524569 | L |
| H-H-0.271900   | 0  | -10.432091 | -3.596404 | -4.140303 | L |
| H-H1-0.097600  | 0  | -12.405587 | -3.719673 | -5.314316 | L |

|                |   |            |           |           |   |
|----------------|---|------------|-----------|-----------|---|
| H-H1-0.097600  | 0 | -13.183840 | -4.375803 | -3.848996 | L |
| H-H1-0.097600  | 0 | -12.335508 | -5.463503 | -4.972547 | L |
| N-N2--0.511415 | 0 | 1.961733   | -0.054695 | -1.683948 | H |
| C-CA-0.057801  | 0 | 0.711722   | 0.410016  | -1.598988 | H |
| C-CA-0.063496  | 0 | 0.028290   | 0.950386  | -2.691955 | H |
| C-CA--0.109122 | 0 | 0.698941   | 1.028651  | -3.911639 | H |
| C-CA--0.164490 | 0 | 2.008331   | 0.566567  | -3.997011 | H |
| C-CA-0.098392  | 0 | 2.600241   | 0.022741  | -2.865528 | H |
| C-C-0.541263   | 0 | -1.374947  | 1.472210  | -2.621187 | H |
| O-O--0.574884  | 0 | -2.035668  | 1.573264  | -3.676027 | H |
| N-N--0.751108  | 0 | -1.636377  | 2.324674  | -1.493989 | H |
| H-H4-0.220889  | 0 | 0.230893   | 0.327411  | -0.630840 | H |
| H-HA-0.160434  | 0 | 0.179761   | 1.443348  | -4.767577 | H |
| H-HA-0.142191  | 0 | 2.566106   | 0.629538  | -4.924399 | H |
| H-H4-0.174502  | 0 | 3.605487   | -0.382473 | -2.888168 | H |
| H-H-0.412468   | 0 | -2.546409  | 2.787513  | -1.621511 | H |
| H-H-0.353801   | 0 | -0.903677  | 3.032197  | -1.379894 | H |
| Zn-ZN-0.974537 | 0 | 2.846066   | -1.098356 | -0.004960 | H |
| O-OW--0.834000 | 0 | -2.165845  | -7.198519 | 3.447840  | L |
| H-HW-0.417000  | 0 | -2.683710  | -6.592611 | 2.898798  | L |
| H-HW-0.417000  | 0 | -2.833934  | -7.793349 | 3.828054  | L |
| O-OW--0.783903 | 0 | 1.335492   | -2.584302 | -0.101512 | H |
| H-HW-0.401253  | 0 | 0.954490   | -2.473898 | 0.805072  | H |
| H-HW-0.424111  | 0 | 1.947116   | -3.362906 | -0.148588 | H |
| O-OW--0.834000 | 0 | -3.746455  | -8.447514 | 7.223847  | L |
| H-HW-0.417000  | 0 | -3.798141  | -7.504056 | 7.397632  | L |
| H-HW-0.417000  | 0 | -3.825012  | -8.514228 | 6.260753  | L |
| O-OW--0.834000 | 0 | 7.179897   | -0.002388 | 1.808088  | L |
| H-HW-0.417000  | 0 | 6.874392   | 0.396359  | 2.642680  | L |
| H-HW-0.417000  | 0 | 6.389625   | 0.090960  | 1.253416  | L |
| O-OW--0.834000 | 0 | 7.052788   | -4.939001 | 4.758910  | L |
| H-HW-0.417000  | 0 | 6.103276   | -5.004882 | 4.988011  | L |
| H-HW-0.417000  | 0 | 7.270584   | -5.824879 | 4.466263  | L |
| O-OW--0.834000 | 0 | 8.572073   | -0.917517 | -0.293965 | L |
| H-HW-0.417000  | 0 | 8.138202   | -0.541692 | 0.498462  | L |
| H-HW-0.417000  | 0 | 8.819657   | -0.126746 | -0.794223 | L |
| O-OW--0.834000 | 0 | 12.617523  | -1.056009 | -1.928499 | L |
| H-HW-0.417000  | 0 | 11.772132  | -0.810720 | -2.342041 | L |
| H-HW-0.417000  | 0 | 12.640110  | -2.016694 | -2.057384 | L |
| O-OW--0.834000 | 0 | 8.279686   | -3.281766 | 0.976639  | L |
| H-HW-0.417000  | 0 | 8.464651   | -2.519876 | 0.389181  | L |
| H-HW-0.417000  | 0 | 7.571713   | -2.940424 | 1.532555  | L |
| O-OW--0.834000 | 0 | 4.360918   | -4.895684 | 5.157387  | L |
| H-HW-0.417000  | 0 | 4.090884   | -4.519594 | 6.018044  | L |
| H-HW-0.417000  | 0 | 4.062870   | -4.220894 | 4.536905  | L |
| S-SH--0.326142 | 0 | -2.316004  | -0.668758 | -1.629003 | H |

**IC1**

|              |    |            |          |          |   |
|--------------|----|------------|----------|----------|---|
| C-CT--0.3662 | -1 | -10.308751 | 3.911350 | 4.037712 | L |
| C-C-0.5972   | 0  | -8.971022  | 3.274773 | 3.790699 | L |
| O-O--0.5679  | 0  | -8.389898  | 2.705350 | 4.707656 | L |
| H-HC-0.1123  | 0  | -11.047636 | 3.444138 | 3.389597 | L |
| H-HC-0.1123  | 0  | -10.242046 | 4.974727 | 3.814714 | L |
| H-HC-0.1123  | 0  | -10.585672 | 3.766925 | 5.079743 | L |

|                |    |            |           |           |        |
|----------------|----|------------|-----------|-----------|--------|
| N-N--0.415700  | 0  | -8.506154  | 3.372834  | 2.551216  | L      |
| C-CT--0.059700 | -1 | -7.340831  | 2.648320  | 2.036438  | L      |
| C-C-0.597300   | 0  | -6.177708  | 3.609564  | 1.832369  | L      |
| O-O--0.567900  | 0  | -6.286977  | 4.561532  | 1.064687  | L      |
| C-CT-0.130300  | 0  | -7.698452  | 1.897338  | 0.728007  | L      |
| C-CT--0.043000 | 0  | -8.875375  | 0.913451  | 0.947038  | L      |
| C-CT--0.320400 | 0  | -6.471776  | 1.133557  | 0.193151  | L      |
| C-CT--0.066000 | 0  | -9.432933  | 0.307106  | -0.346095 | L      |
| H-H-0.271900   | 0  | -9.052086  | 3.927284  | 1.899903  | L      |
| H-H1-0.086900  | 0  | -7.033799  | 1.900334  | 2.767353  | L      |
| H-HC-0.018700  | 0  | -7.998183  | 2.633253  | -0.020536 | L      |
| H-HC-0.023600  | 0  | -9.704295  | 1.433064  | 1.426047  | L      |
| H-HC-0.023600  | 0  | -8.558741  | 0.106899  | 1.609489  | L      |
| H-HC-0.088200  | 0  | -6.135472  | 0.393250  | 0.920052  | L      |
| H-HC-0.088200  | 0  | -5.652732  | 1.822388  | -0.015692 | L      |
| H-HC-0.088200  | 0  | -6.710087  | 0.636110  | -0.744785 | L      |
| H-HC-0.018600  | 0  | -9.679863  | 1.098917  | -1.052578 | L      |
| H-HC-0.018600  | 0  | -10.339493 | -0.252290 | -0.118010 | L      |
| H-HC-0.018600  | 0  | -8.707806  | -0.373146 | -0.789692 | L      |
| N-N--0.516300  | 0  | -5.081966  | 3.352915  | 2.540473  | L      |
| C-CT-0.038100  | -1 | -3.773985  | 3.979262  | 2.405716  | L H-HC |
| C-C-0.536600   | 0  | -3.699826  | 5.499217  | 2.151874  | L      |
| O-O--0.581900  | 0  | -2.719252  | 6.020476  | 1.617158  | L      |
| C-CT--0.547145 | 0  | -2.999313  | 3.173395  | 1.356369  | H      |
| C-C-0.532653   | 0  | -2.525839  | 1.808790  | 1.827711  | H      |
| O-O2--0.588507 | 0  | -2.705491  | 1.429381  | 2.989004  | H      |
| O-O2--0.625559 | 0  | -1.901748  | 1.104073  | 0.929917  | H      |
| H-H-0.293600   | 0  | -5.080720  | 2.505547  | 3.096126  | L      |
| H-H1-0.088000  | 0  | -3.254948  | 3.842550  | 3.355280  | L      |
| H-HC-0.128435  | 0  | -2.096351  | 3.734054  | 1.070455  | H      |
| H-HC-0.183556  | 0  | -3.597423  | 3.108525  | 0.442386  | H      |
| N-N--0.415700  | 0  | -4.674776  | 6.251330  | 2.644422  | L      |
| C-CT--0.025200 | -1 | -4.648296  | 7.697706  | 2.542035  | L      |
| C-C-0.597300   | 0  | -3.753738  | 8.319769  | 3.598989  | L      |
| O-O--0.567900  | 0  | -4.233146  | 8.945822  | 4.544633  | L      |
| H-H-0.271900   | 0  | -5.485546  | 5.757201  | 2.982136  | L      |
| H-H1-0.069800  | 0  | -5.658478  | 8.082520  | 2.674545  | L      |
| H-H1-0.069800  | 0  | -4.295726  | 7.997681  | 1.554006  | L      |
| N-N--0.415700  | 0  | -2.448928  | 8.132453  | 3.435364  | L      |
| C-CT--0.038900 | -1 | -1.425795  | 8.551597  | 4.386661  | L      |
| C-C-0.597300   | 0  | -0.520461  | 9.641741  | 3.803341  | L      |
| O-O--0.567900  | 0  | -0.619441  | 10.017237 | 2.633743  | L      |
| C-CT-0.365400  | 0  | -0.564411  | 7.379344  | 4.896788  | L      |
| O-OH--0.676100 | 0  | 0.507656   | 7.142624  | 4.021509  | L      |
| C-CT--0.243800 | 0  | -1.321174  | 6.072412  | 5.114250  | L      |
| H-H-0.271900   | 0  | -2.175793  | 7.561701  | 2.638197  | L      |
| H-H1-0.100700  | 0  | -1.920732  | 8.980594  | 5.256267  | L      |
| H-H1-0.004300  | 0  | -0.139419  | 7.677775  | 5.855729  | L      |
| H-HC-0.064200  | 0  | -2.202516  | 6.254057  | 5.728060  | L      |
| H-HC-0.064200  | 0  | -0.670814  | 5.363691  | 5.620954  | L      |
| H-HC-0.064200  | 0  | -1.620117  | 5.645985  | 4.156837  | L      |
| H-HO-0.410200  | 0  | 1.049088   | 6.417114  | 4.400987  | L      |
| N-N--0.415700  | 0  | 0.401746   | 10.143189 | 4.629298  | L      |
| C-CT--0.025200 | -1 | 1.443325   | 11.077789 | 4.211327  | L      |

30

|                |    |           |           |           |   |
|----------------|----|-----------|-----------|-----------|---|
| C-C-0.597300   | 0  | 2.316388  | 10.589631 | 3.062827  | L |
| O-O--0.567900  | 0  | 2.590158  | 11.345888 | 2.136174  | L |
| H-H-0.271900   | 0  | 0.451898  | 9.757725  | 5.557111  | L |
| H-H1-0.069800  | 0  | 2.095927  | 11.294128 | 5.056146  | L |
| H-H1-0.069800  | 0  | 0.974020  | 12.010132 | 3.896348  | L |
| N-N--0.516300  | 0  | 2.750290  | 9.334537  | 3.138511  | L |
| C-CT-0.038100  | -1 | 3.649010  | 8.727443  | 2.158494  | L |
| C-C-0.536600   | 0  | 3.010261  | 8.410137  | 0.818787  | L |
| O-O--0.581900  | 0  | 3.738223  | 8.088866  | -0.113932 | L |
| C-CT--0.030300 | 0  | 4.226860  | 7.415231  | 2.719732  | L |
| C-C-0.799400   | -1 | 5.578538  | 7.609521  | 3.383565  | L |
| O-O2--0.801400 | -1 | 6.159407  | 8.713682  | 3.305708  | L |
| O-O2--0.801400 | -1 | 6.037681  | 6.653769  | 4.041552  | L |
| H-H-0.293600   | 0  | 2.436338  | 8.749414  | 3.897233  | L |
| H-H1-0.088000  | 0  | 4.453050  | 9.428650  | 1.931685  | L |
| H-HC--0.012200 | 0  | 4.370755  | 6.687043  | 1.919741  | L |
| H-HC--0.012200 | 0  | 3.525812  | 6.973582  | 3.430774  | L |
| N-N--0.415700  | 0  | 1.687939  | 8.489584  | 0.706293  | L |
| C-CT--0.002400 | -1 | 0.979931  | 8.327208  | -0.557055 | L |
| C-C-0.597300   | 0  | 0.415984  | 9.638356  | -1.101031 | L |
| O-O--0.567900  | 0  | 0.374638  | 9.840146  | -2.314716 | L |
| C-CT--0.034300 | 0  | -0.137187 | 7.282766  | -0.405969 | L |
| C-CA-0.011800  | 0  | 0.334744  | 5.859748  | -0.156818 | L |
| C-CA--0.125600 | 0  | 0.771038  | 5.056768  | -1.228097 | L |
| C-CA--0.125600 | 0  | 0.294344  | 5.317058  | 1.140016  | L |
| C-CA--0.170400 | 0  | 1.157608  | 3.724016  | -0.996205 | L |
| C-CA--0.170400 | 0  | 0.689056  | 3.989000  | 1.374354  | L |
| C-CA--0.107200 | 0  | 1.119995  | 3.191750  | 0.303035  | L |
| H-H-0.271900   | 0  | 1.167971  | 8.704286  | 1.545049  | L |
| H-H1-0.097800  | 0  | 1.663227  | 7.952373  | -1.319055 | L |
| H-HC-0.029500  | 0  | -0.724419 | 7.276288  | -1.324845 | L |
| H-HC-0.029500  | 0  | -0.805545 | 7.590035  | 0.399988  | L |
| H-HA-0.133000  | 0  | 0.798091  | 5.462168  | -2.228757 | L |
| H-HA-0.133000  | 0  | -0.079777 | 5.914113  | 1.954286  | L |
| H-HA-0.143000  | 0  | 1.481173  | 3.096471  | -1.810907 | L |
| H-HA-0.143000  | 0  | 0.628951  | 3.574363  | 2.370377  | L |
| H-HA-0.129700  | 0  | 1.408112  | 2.165884  | 0.477759  | L |
| N-N--0.4157    | 0  | -0.019036 | 10.536923 | -0.216919 | L |
| C-CT--0.1490   | -1 | -0.466795 | 11.862054 | -0.588775 | L |
| H-H-0.2719     | 0  | 0.006104  | 10.287241 | 0.766418  | L |
| H-H1-0.0976    | 0  | -0.826950 | 12.386997 | 0.296608  | L |
| H-H1-0.0976    | 0  | -1.272304 | 11.785606 | -1.321004 | L |
| H-H1-0.0976    | 0  | 0.364311  | 12.417117 | -1.026555 | L |
| C-CT--0.3662   | -1 | 7.989928  | 8.437483  | -0.120393 | L |
| C-C-0.5972     | 0  | 7.524050  | 7.665785  | -1.330860 | L |
| O-O--0.5679    | 0  | 8.339585  | 7.351650  | -2.194011 | L |
| H-HC-0.1123    | 0  | 7.507355  | 9.412284  | -0.102731 | L |
| H-HC-0.1123    | 0  | 9.070078  | 8.556947  | -0.164684 | L |
| H-HC-0.1123    | 0  | 7.726710  | 7.885974  | 0.782981  | L |
| N-N--0.415700  | 0  | 6.216441  | 7.402683  | -1.417937 | L |
| C-CT--0.051800 | -1 | 5.568444  | 6.870615  | -2.625639 | L |
| C-C-0.597300   | 0  | 4.867088  | 7.955279  | -3.440963 | L |
| O-O--0.567900  | 0  | 5.075995  | 8.088380  | -4.646428 | L |
| C-CT--0.110200 | 0  | 4.677120  | 5.647298  | -2.319674 | L |

|                |    |           |           |           |   |
|----------------|----|-----------|-----------|-----------|---|
| C-CT-0.353100  | 0  | 4.989222  | 4.460074  | -3.256567 | L |
| C-CT--0.412100 | 0  | 4.077611  | 3.275996  | -2.957251 | L |
| C-CT--0.412100 | 0  | 4.797719  | 4.776612  | -4.744309 | L |
| H-H-0.271900   | 0  | 5.616616  | 7.690934  | -0.652472 | L |
| H-H1-0.092200  | 0  | 6.372823  | 6.518859  | -3.271497 | L |
| H-HC-0.045700  | 0  | 3.624888  | 5.921505  | -2.407891 | L |
| H-HC-0.045700  | 0  | 4.848619  | 5.321997  | -1.293021 | L |
| H-HC--0.036100 | 0  | 6.020910  | 4.144781  | -3.094687 | L |
| H-HC-0.100000  | 0  | 3.065977  | 3.498402  | -3.291312 | L |
| H-HC-0.100000  | 0  | 4.066867  | 3.073125  | -1.887394 | L |
| H-HC-0.100000  | 0  | 4.443799  | 2.392262  | -3.477107 | L |
| H-HC-0.100000  | 0  | 3.805748  | 5.197829  | -4.909553 | L |
| H-HC-0.100000  | 0  | 4.907834  | 3.870311  | -5.337081 | L |
| H-HC-0.100000  | 0  | 5.545736  | 5.494736  | -5.077122 | L |
| N-N--0.4157    | 0  | 4.053920  | 8.743426  | -2.751945 | L |
| C-CT--0.1490   | -1 | 3.362881  | 9.903977  | -3.244251 | L |
| H-H-0.2719     | 0  | 3.961244  | 8.513342  | -1.770736 | L |
| H-H1-0.0976    | 0  | 4.032498  | 10.499106 | -3.866449 | L |
| H-H1-0.0976    | 0  | 3.012858  | 10.508712 | -2.406405 | L |
| H-H1-0.0976    | 0  | 2.503826  | 9.592619  | -3.840990 | L |
| C-CT--0.3662   | -1 | -8.724966 | 2.352976  | 8.141225  | L |
| C-C-0.5972     | 0  | -7.853008 | 1.143255  | 7.959305  | L |
| O-O--0.5679    | 0  | -7.526447 | 0.463760  | 8.925499  | L |
| H-HC-0.1123    | 0  | -9.649399 | 2.209004  | 7.585371  | L |
| H-HC-0.1123    | 0  | -8.199877 | 3.228819  | 7.763209  | L |
| H-HC-0.1123    | 0  | -8.942454 | 2.479035  | 9.199809  | L |
| N-N--0.415700  | 0  | -7.468786 | 0.891310  | 6.716289  | L |
| C-CT--0.038900 | -1 | -6.663608 | -0.259387 | 6.301507  | L |
| C-C-0.597300   | 0  | -5.400752 | 0.234964  | 5.618518  | L |
| O-O--0.567900  | 0  | -5.447145 | 0.685296  | 4.473817  | L |
| C-CT-0.365400  | 0  | -7.467916 | -1.224154 | 5.417021  | L |
| O-OH--0.676100 | 0  | -8.015127 | -0.556157 | 4.305821  | L |
| C-CT--0.243800 | 0  | -8.621668 | -1.845645 | 6.209557  | L |
| H-H-0.271900   | 0  | -7.800651 | 1.513528  | 5.983184  | L |
| H-H1-0.100700  | 0  | -6.360782 | -0.823901 | 7.183172  | L |
| H-H1-0.004300  | 0  | -6.808566 | -2.019527 | 5.067412  | L |
| H-HC-0.064200  | 0  | -8.228618 | -2.379517 | 7.074452  | L |
| H-HC-0.064200  | 0  | -9.172971 | -2.542658 | 5.584701  | L |
| H-HC-0.064200  | 0  | -9.310107 | -1.070223 | 6.543855  | L |
| H-HO-0.410200  | 0  | -7.322262 | 0.033355  | 3.974655  | L |
| N-N--0.415700  | 0  | -4.304567 | 0.213662  | 6.380607  | L |
| C-CT--0.059700 | -1 | -3.109816 | 1.034847  | 6.171710  | L |
| C-C-0.597300   | 0  | -1.862416 | 0.157780  | 6.097918  | L |
| O-O--0.567900  | 0  | -1.604606 | -0.647087 | 6.997294  | L |
| C-CT-0.130300  | 0  | -2.991482 | 2.096950  | 7.290314  | L |
| C-CT--0.043000 | 0  | -4.245793 | 2.992824  | 7.446543  | L |
| C-CT--0.320400 | 0  | -1.746983 | 2.972111  | 7.075454  | L |
| C-CT--0.066000 | 0  | -4.656750 | 3.797929  | 6.204433  | L |
| H-H-0.271900   | 0  | -4.368170 | -0.239916 | 7.277637  | L |
| H-H1-0.086900  | 0  | -3.212032 | 1.570835  | 5.233706  | L |
| H-HC-0.018700  | 0  | -2.858480 | 1.572771  | 8.238668  | L |
| H-HC-0.023600  | 0  | -4.069155 | 3.695559  | 8.261603  | L |
| H-HC-0.023600  | 0  | -5.090370 | 2.373631  | 7.747523  | L |
| H-HC-0.088200  | 0  | -1.732768 | 3.348040  | 6.052398  | L |

|                |    |           |            |           |   |      |     |
|----------------|----|-----------|------------|-----------|---|------|-----|
| H-HC-0.088200  | 0  | -0.848191 | 2.376474   | 7.238348  | L |      |     |
| H-HC-0.088200  | 0  | -1.739968 | 3.804929   | 7.777550  | L |      |     |
| H-HC-0.018600  | 0  | -3.850383 | 4.460612   | 5.894583  | L |      |     |
| H-HC-0.018600  | 0  | -5.534112 | 4.400208   | 6.440584  | L |      |     |
| H-HC-0.018600  | 0  | -4.909483 | 3.129686   | 5.384219  | L |      |     |
| N-N--0.516300  | 0  | -1.110396 | 0.338912   | 5.017771  | L |      |     |
| C-CT-0.038100  | -1 | 0.186208  | -0.247869  | 4.733290  | L | H-HC | 178 |
| C-C-0.536600   | 0  | 1.127652  | -0.092891  | 5.933674  | L |      |     |
| O-O--0.581900  | 0  | 1.343292  | 1.000301   | 6.451692  | L |      |     |
| C-CT--0.520019 | 0  | 0.678734  | 0.398377   | 3.423626  | H |      |     |
| C-C-0.636404   | 0  | 0.987412  | -0.566085  | 2.290678  | H |      |     |
| O-O2--0.608036 | 0  | 0.391125  | -1.681186  | 2.209235  | H |      |     |
| O-O2--0.608131 | 0  | 1.832538  | -0.121655  | 1.447764  | H |      |     |
| H-H-0.293600   | 0  | -1.511165 | 0.934114   | 4.299710  | L |      |     |
| H-H1-0.088000  | 0  | 0.028991  | -1.315763  | 4.574443  | L |      |     |
| H-HC-0.132300  | 0  | 1.573270  | 0.991909   | 3.623870  | H |      |     |
| H-HC-0.188993  | 0  | -0.074898 | 1.091584   | 3.035415  | H |      |     |
| N-N--0.415700  | 0  | 1.668274  | -1.206570  | 6.395964  | L |      |     |
| C-CT-0.033700  | -1 | 2.568870  | -1.260881  | 7.524747  | L |      |     |
| C-C-0.597300   | 0  | 3.788859  | -2.080593  | 7.119995  | L |      |     |
| O-O--0.567900  | 0  | 3.836407  | -3.306939  | 7.266948  | L |      |     |
| C-CT--0.182500 | 0  | 1.812411  | -1.826170  | 8.735134  | L |      |     |
| H-H-0.271900   | 0  | 1.361070  | -2.083079  | 5.988968  | L |      |     |
| H-H1-0.082300  | 0  | 2.914314  | -0.257530  | 7.781452  | L |      |     |
| H-HC-0.060300  | 0  | 0.972839  | -1.172624  | 8.975296  | L |      |     |
| H-HC-0.060300  | 0  | 2.483377  | -1.882134  | 9.592059  | L |      |     |
| H-HC-0.060300  | 0  | 1.435461  | -2.824147  | 8.505616  | L |      |     |
| N-N--0.4157    | 0  | 4.759732  | -1.383590  | 6.542136  | L |      |     |
| C-CT-0.0188    | -1 | 5.964797  | -1.964630  | 5.994598  | L | H-HC | 200 |
| C-C-0.5973     | 0  | 7.161283  | -1.820347  | 6.944205  | L |      |     |
| O-O--0.5679    | 0  | 7.209639  | -0.969864  | 7.835231  | L |      |     |
| C-CT--0.517456 | 0  | 6.221105  | -1.321240  | 4.628846  | H |      |     |
| C-CM-0.287351  | 0  | 5.357996  | -1.796958  | 3.517924  | H |      |     |
| N-N2--0.586994 | 0  | 5.506215  | -3.048667  | 2.936336  | H |      |     |
| C-CM--0.020338 | 0  | 4.387380  | -1.184425  | 2.775065  | H |      |     |
| C-CM-0.242458  | 0  | 4.650139  | -3.132837  | 1.882823  | H |      |     |
| N-N2--0.505070 | 0  | 3.963281  | -2.012837  | 1.755979  | H |      |     |
| H-H-0.2719     | 0  | 4.656464  | -0.373937  | 6.489798  | L |      |     |
| H-H1-0.0881    | 0  | 5.818033  | -3.030246  | 5.848928  | L |      |     |
| H-HC-0.166355  | 0  | 7.277684  | -1.482721  | 4.368836  | H |      |     |
| H-HC-0.174481  | 0  | 6.104144  | -0.243355  | 4.767727  | H |      |     |
| H-H-0.335795   | 0  | 6.149550  | -3.768330  | 3.258948  | H |      |     |
| H-H4-0.152777  | 0  | 3.984925  | -0.190300  | 2.898419  | H |      |     |
| H-H5-0.209475  | 0  | 4.555358  | -3.996708  | 1.239690  | H |      |     |
| N-N--0.4157    | 0  | 8.164726  | -2.660286  | 6.696965  | L |      |     |
| C-CT--0.1490   | -1 | 9.435025  | -2.590673  | 7.385998  | L |      |     |
| H-H-0.2719     | 0  | 8.012426  | -3.337977  | 5.956643  | L |      |     |
| H-H1-0.0976    | 0  | 10.107215 | -3.360173  | 7.005123  | L |      |     |
| H-H1-0.0976    | 0  | 9.278902  | -2.739596  | 8.455854  | L |      |     |
| H-H1-0.0976    | 0  | 9.882522  | -1.607546  | 7.229044  | L |      |     |
| C-CT--0.3662   | -1 | 8.358294  | -9.387455  | 0.902554  | L |      |     |
| C-C-0.5972     | 0  | 8.730037  | -9.142394  | -0.547311 | L |      |     |
| O-O--0.5679    | 0  | 9.749774  | -8.514141  | -0.804304 | L |      |     |
| H-HC-0.1123    | 0  | 8.296574  | -10.456317 | 1.093130  | L |      |     |

|                |    |           |            |           |            |
|----------------|----|-----------|------------|-----------|------------|
| H-HC-0.1123    | 0  | 7.410933  | -8.899186  | 1.123523  | L          |
| H-HC-0.1123    | 0  | 9.131057  | -8.950471  | 1.534922  | L          |
| N-N--0.254800  | 0  | 7.919264  | -9.609731  | -1.513126 | L          |
| C-CT--0.026600 | -1 | 8.160830  | -9.366182  | -2.937477 | L          |
| C-C-0.589600   | 0  | 8.006515  | -7.892863  | -3.315537 | L          |
| O-O--0.574800  | 0  | 8.713030  | -7.393836  | -4.188367 | L          |
| C-CT--0.007000 | 0  | 7.158986  | -10.262096 | -3.673591 | L          |
| C-CT-0.018900  | 0  | 6.002071  | -10.402562 | -2.683123 | L          |
| C-CT-0.019200  | 0  | 6.697482  | -10.379498 | -1.321248 | L          |
| H-H1-0.064100  | 0  | 9.174792  | -9.671896  | -3.198593 | L          |
| H-HC-0.025300  | 0  | 7.609590  | -11.241103 | -3.843593 | L          |
| H-HC-0.025300  | 0  | 6.832871  | -9.827790  | -4.619957 | L          |
| H-HC-0.021300  | 0  | 5.447287  | -11.328555 | -2.837185 | L          |
| H-HC-0.021300  | 0  | 5.337583  | -9.541411  | -2.769650 | L          |
| H-H1-0.039100  | 0  | 6.045928  | -9.920637  | -0.576249 | L          |
| H-H1-0.039100  | 0  | 6.955131  | -11.396179 | -1.021416 | L          |
| N-N--0.516300  | 0  | 7.086168  | -7.198046  | -2.645780 | L          |
| C-CT-0.039700  | -1 | 6.837618  | -5.770056  | -2.814681 | L          |
| C-C-0.536600   | 0  | 8.099115  | -4.908692  | -2.681047 | L          |
| O-O--0.581900  | 0  | 8.275119  | -3.921684  | -3.399101 | L          |
| C-CT-0.056000  | 0  | 5.737199  | -5.329129  | -1.844057 | L H-HC 244 |
| C-CT--0.515956 | 0  | 5.221235  | -3.936135  | -2.217958 | H          |
| C-C-0.587828   | 0  | 4.123815  | -3.395601  | -1.310210 | H          |
| O-O2--0.600319 | 0  | 4.057823  | -2.114150  | -1.288396 | H          |
| O-O2--0.589127 | 0  | 3.371914  | -4.183906  | -0.691620 | H          |
| H-H-0.293600   | 0  | 6.556715  | -7.675461  | -1.935460 | L          |
| H-H1-0.110500  | 0  | 6.466204  | -5.613936  | -3.827855 | L          |
| H-HC--0.017300 | 0  | 6.125785  | -5.319315  | -0.824593 | L          |
| H-HC--0.017300 | 0  | 4.908748  | -6.037175  | -1.901448 | L          |
| H-HC-0.167759  | 0  | 4.828222  | -3.974602  | -3.240839 | H          |
| H-HC-0.135230  | 0  | 6.049782  | -3.219191  | -2.217135 | H          |
| N-N--0.415700  | 0  | 9.008954  | -5.318751  | -1.799756 | L          |
| C-CT--0.024900 | -1 | 10.246005 | -4.615425  | -1.481094 | L          |
| C-C-0.597300   | 0  | 11.266889 | -4.498040  | -2.605975 | L          |
| O-O--0.567900  | 0  | 12.243700 | -3.760958  | -2.471163 | L          |
| C-CT-0.211700  | 0  | 10.888342 | -5.252810  | -0.242923 | L          |
| O-OH--0.654600 | 0  | 9.933203  | -5.443767  | 0.790408  | L          |
| H-H-0.271900   | 0  | 8.802582  | -6.132867  | -1.237277 | L          |
| H-H1-0.084300  | 0  | 9.976647  | -3.593009  | -1.211850 | L          |
| H-H1-0.035200  | 0  | 11.687717 | -4.604972  | 0.119773  | L          |
| H-H1-0.035200  | 0  | 11.314626 | -6.220364  | -0.512172 | L          |
| H-HO-0.427500  | 0  | 9.374186  | -4.638497  | 0.863831  | L          |
| N-N--0.415700  | 0  | 11.029379 | -5.180556  | -3.724308 | L          |
| C-CT-0.033700  | -1 | 11.779461 | -5.013297  | -4.962177 | L          |
| C-C-0.597300   | 0  | 10.954867 | -4.435190  | -6.116309 | L          |
| O-O--0.567900  | 0  | 11.395233 | -4.427026  | -7.264952 | L          |
| C-CT--0.182500 | 0  | 12.388884 | -6.378825  | -5.311627 | L          |
| H-H-0.271900   | 0  | 10.217659 | -5.787703  | -3.733098 | L          |
| H-H1-0.082300  | 0  | 12.604440 | -4.317977  | -4.801223 | L          |
| H-HC-0.060300  | 0  | 13.001732 | -6.733420  | -4.482159 | L          |
| H-HC-0.060300  | 0  | 13.015561 | -6.286192  | -6.199331 | L          |
| H-HC-0.060300  | 0  | 11.593589 | -7.099577  | -5.508514 | L          |
| N-N--0.415700  | 0  | 9.772519  | -3.924648  | -5.790621 | L          |
| C-CT--0.025200 | -1 | 8.865802  | -3.249445  | -6.695974 | L          |

|                |    |           |           |           |   |
|----------------|----|-----------|-----------|-----------|---|
| C-C-0.597300   | 0  | 8.788514  | -1.748166 | -6.468348 | L |
| O-O--0.567900  | 0  | 8.777140  | -0.971536 | -7.420689 | L |
| H-H-0.271900   | 0  | 9.488140  | -3.995570 | -4.819832 | L |
| H-H1-0.069800  | 0  | 7.865002  | -3.659321 | -6.563774 | L |
| H-H1-0.069800  | 0  | 9.166312  | -3.420835 | -7.730113 | L |
| N-N--0.415700  | 0  | 8.736611  | -1.347213 | -5.201456 | L |
| C-CT--0.002400 | -1 | 8.584317  | 0.038575  | -4.777775 | L |
| C-C-0.597300   | 0  | 9.709923  | 0.466054  | -3.828296 | L |
| O-O--0.567900  | 0  | 10.337452 | -0.388967 | -3.195351 | L |
| C-CT--0.034300 | 0  | 7.208885  | 0.177702  | -4.099176 | L |
| C-CA-0.011800  | 0  | 6.036969  | 0.000548  | -5.046153 | L |
| C-CA--0.125600 | 0  | 5.731297  | 1.007248  | -5.981626 | L |
| C-CA--0.125600 | 0  | 5.264075  | -1.175014 | -5.011588 | L |
| C-CA--0.170400 | 0  | 4.665674  | 0.836337  | -6.883439 | L |
| C-CA--0.170400 | 0  | 4.196888  | -1.344653 | -5.911377 | L |
| C-CA--0.107200 | 0  | 3.901944  | -0.343509 | -6.852651 | L |
| H-H-0.271900   | 0  | 8.756224  | -2.056525 | -4.477996 | L |
| H-H1-0.097800  | 0  | 8.612280  | 0.690973  | -5.650510 | L |
| H-HC-0.029500  | 0  | 7.120984  | 1.160043  | -3.636008 | L |
| H-HC-0.029500  | 0  | 7.140843  | -0.557157 | -3.295197 | L |
| H-HA-0.133000  | 0  | 6.322292  | 1.910559  | -6.016954 | L |
| H-HA-0.133000  | 0  | 5.491754  | -1.952466 | -4.297625 | L |
| H-HA-0.143000  | 0  | 4.437079  | 1.609765  | -7.602862 | L |
| H-HA-0.143000  | 0  | 3.601476  | -2.245431 | -5.879961 | L |
| H-HA-0.129700  | 0  | 3.082629  | -0.479050 | -7.544513 | L |
| N-N--0.254800  | 0  | 9.963616  | 1.779592  | -3.674517 | L |
| C-CT--0.026600 | -1 | 10.822076 | 2.270380  | -2.602147 | L |
| C-C-0.589600   | 0  | 10.187613 | 2.010715  | -1.227026 | L |
| O-O--0.574800  | 0  | 8.993927  | 1.700998  | -1.151348 | L |
| C-CT--0.007000 | 0  | 10.977704 | 3.772343  | -2.874843 | L |
| C-CT-0.018900  | 0  | 9.662094  | 4.141361  | -3.557888 | L |
| C-CT-0.019200  | 0  | 9.360103  | 2.897959  | -4.394059 | L |
| H-H1-0.064100  | 0  | 11.793650 | 1.780438  | -2.658759 | L |
| H-HC-0.025300  | 0  | 11.804612 | 3.932526  | -3.568229 | L |
| H-HC-0.025300  | 0  | 11.130595 | 4.351580  | -1.962895 | L |
| H-HC-0.021300  | 0  | 9.759453  | 5.034407  | -4.176004 | L |
| H-HC-0.021300  | 0  | 8.882173  | 4.279149  | -2.806308 | L |
| H-H1-0.039100  | 0  | 8.282752  | 2.788394  | -4.508726 | L |
| H-H1-0.039100  | 0  | 9.831351  | 2.990918  | -5.373359 | L |
| N-N--0.254800  | 0  | 10.952096 | 2.122604  | -0.130127 | L |
| C-CT--0.026600 | -1 | 10.398112 | 2.112209  | 1.217039  | L |
| C-C-0.589600   | 0  | 9.342918  | 3.195204  | 1.444479  | L |
| O-O--0.574800  | 0  | 9.597530  | 4.374067  | 1.208646  | L |
| C-CT--0.007000 | 0  | 11.596408 | 2.303085  | 2.157554  | L |
| C-CT-0.018900  | 0  | 12.785305 | 1.816916  | 1.332245  | L |
| C-CT-0.019200  | 0  | 12.401730 | 2.229007  | -0.086107 | L |
| H-H1-0.064100  | 0  | 9.959741  | 1.129956  | 1.399432  | L |
| H-HC-0.025300  | 0  | 11.480702 | 1.726489  | 3.075854  | L |
| H-HC-0.025300  | 0  | 11.735523 | 3.360455  | 2.390358  | L |
| H-HC-0.021300  | 0  | 12.852633 | 0.729175  | 1.390231  | L |
| H-HC-0.021300  | 0  | 13.719461 | 2.280204  | 1.650697  | L |
| H-H1-0.039100  | 0  | 12.696832 | 3.263645  | -0.266040 | L |
| H-H1-0.039100  | 0  | 12.880278 | 1.562396  | -0.804392 | L |
| N-N--0.4157    | 0  | 8.177044  | 2.770885  | 1.921872  | L |



|                |    |           |           |           |   |      |     |
|----------------|----|-----------|-----------|-----------|---|------|-----|
| C-CT-0.0188    | -1 | 7.021105  | 3.599407  | 2.218388  | L | H-HC | 334 |
| C-C-0.5973     | 0  | 6.159693  | 3.007880  | 3.331048  | L |      |     |
| O-O--0.5679    | 0  | 6.159775  | 1.795686  | 3.544125  | L |      |     |
| C-CT--0.515368 | 0  | 6.196729  | 3.721866  | 0.908286  | H |      |     |
| C-CM-0.287903  | 0  | 5.597438  | 2.446954  | 0.392415  | H |      |     |
| N-N2--0.582625 | 0  | 6.236868  | 1.647983  | -0.542174 | H |      |     |
| C-CM--0.036893 | 0  | 4.460090  | 1.739515  | 0.709216  | H |      |     |
| C-CM-0.243454  | 0  | 5.497035  | 0.528835  | -0.747605 | H |      |     |
| N-N2--0.523998 | 0  | 4.416203  | 0.548584  | 0.010147  | H |      |     |
| H-H-0.2719     | 0  | 8.043895  | 1.774105  | 2.015277  | L |      |     |
| H-H1-0.0881    | 0  | 7.356794  | 4.593303  | 2.529609  | L |      |     |
| H-HC-0.162301  | 0  | 6.850579  | 4.178203  | 0.150675  | H |      |     |
| H-HC-0.188340  | 0  | 5.403447  | 4.456576  | 1.093191  | H |      |     |
| H-H-0.339448   | 0  | 7.149822  | 1.847911  | -0.950492 | H |      |     |
| H-H4-0.185957  | 0  | 3.672079  | 2.009337  | 1.397629  | H |      |     |
| H-H5-0.211295  | 0  | 5.774237  | -0.268936 | -1.421518 | H |      |     |
| N-N--0.415700  | 0  | 5.400147  | 3.873420  | 3.991244  | L |      |     |
| C-CT-0.014300  | -1 | 4.555520  | 3.576977  | 5.139226  | L |      |     |
| C-C-0.597300   | 0  | 5.205712  | 2.624307  | 6.153651  | L |      |     |
| O-O--0.567900  | 0  | 4.681588  | 1.571114  | 6.519767  | L |      |     |
| C-CT--0.204100 | 0  | 3.107917  | 3.298165  | 4.710201  | L |      |     |
| C-C-0.713000   | 0  | 2.169129  | 4.176363  | 5.516264  | L |      |     |
| N-N--0.919100  | 0  | 1.598693  | 3.693188  | 6.585164  | L |      |     |
| O-O--0.593100  | 0  | 1.971520  | 5.344044  | 5.228204  | L |      |     |
| H-H-0.271900   | 0  | 5.547437  | 4.862398  | 3.780643  | L |      |     |
| H-H1-0.104800  | 0  | 4.520218  | 4.528830  | 5.674207  | L |      |     |
| H-HC-0.079700  | 0  | 2.873710  | 2.248827  | 4.855424  | L |      |     |
| H-HC-0.079700  | 0  | 2.967296  | 3.544538  | 3.658102  | L |      |     |
| H-H-0.419600   | 0  | 0.941326  | 4.272049  | 7.061595  | L |      |     |
| H-H-0.419600   | 0  | 1.655852  | 2.684738  | 6.729014  | L |      |     |
| N-N--0.4157    | 0  | 6.392444  | 3.054117  | 6.595469  | L |      |     |
| C-CT--0.1490   | -1 | 7.299118  | 2.308049  | 7.446332  | L |      |     |
| H-H-0.2719     | 0  | 6.705257  | 3.929343  | 6.198752  | L |      |     |
| H-H1-0.0976    | 0  | 8.051452  | 2.971548  | 7.872433  | L |      |     |
| H-H1-0.0976    | 0  | 7.789322  | 1.527421  | 6.861453  | L |      |     |
| H-H1-0.0976    | 0  | 6.740597  | 1.825517  | 8.251602  | L |      |     |
| C-CT--0.3662   | -1 | -2.250970 | -2.765933 | 9.537794  | L |      |     |
| C-C-0.5972     | 0  | -2.379007 | -3.852276 | 8.505232  | L |      |     |
| O-O--0.5679    | 0  | -2.924823 | -4.913941 | 8.792883  | L |      |     |
| H-HC-0.1123    | 0  | -1.196323 | -2.552380 | 9.700619  | L |      |     |
| H-HC-0.1123    | 0  | -2.708975 | -3.100996 | 10.466042 | L |      |     |
| H-HC-0.1123    | 0  | -2.755188 | -1.870844 | 9.178509  | L |      |     |
| N-N--0.347900  | 0  | -1.848500 | -3.589641 | 7.314175  | L |      |     |
| C-CT--0.240000 | -1 | -1.744262 | -4.554346 | 6.213105  | L |      |     |
| C-C-0.734100   | 0  | -0.334075 | -4.588426 | 5.636458  | L |      |     |
| O-O--0.589400  | 0  | 0.480651  | -3.706527 | 5.892612  | L |      |     |
| C-CT--0.009400 | 0  | -2.832310 | -4.259585 | 5.159468  | L |      |     |
| C-CT-0.018700  | 0  | -2.598474 | -2.977290 | 4.348889  | L | H-HC | 379 |
| C-CT--0.464524 | 0  | -3.690055 | -2.792847 | 3.287570  | H |      |     |
| C-CT--0.195159 | 0  | -3.579514 | -1.488698 | 2.506795  | H |      |     |
| N-N3--0.748751 | 0  | -2.370576 | -1.416532 | 1.620312  | H |      |     |
| H-H-0.274700   | 0  | -1.451876 | -2.661917 | 7.180320  | L |      |     |
| H-H1-0.142600  | 0  | -1.935214 | -5.550888 | 6.612062  | L |      |     |
| H-HC-0.036200  | 0  | -3.799041 | -4.191117 | 5.661304  | L |      |     |

|                |    |           |           |           |   |
|----------------|----|-----------|-----------|-----------|---|
| H-HC-0.036200  | 0  | -2.889322 | -5.091493 | 4.464719  | L |
| H-HC-0.010300  | 0  | -1.626883 | -3.021477 | 3.856587  | L |
| H-HC-0.010300  | 0  | -2.622544 | -2.126569 | 5.022388  | L |
| H-HC-0.173903  | 0  | -4.661394 | -2.794798 | 3.791149  | H |
| H-HC-0.148535  | 0  | -3.678260 | -3.654818 | 2.605846  | H |
| H-HP-0.236066  | 0  | -3.548433 | -0.604955 | 3.143440  | H |
| H-HP-0.172509  | 0  | -4.439550 | -1.387927 | 1.832818  | H |
| H-H-0.437293   | 0  | -2.215243 | -0.408108 | 1.259978  | H |
| H-H-0.366736   | 0  | -2.514250 | -2.016621 | 0.801096  | H |
| H-H-0.419451   | 0  | -1.469802 | -1.670330 | 2.073474  | H |
| N-N--0.415700  | 0  | -0.036552 | -5.620923 | 4.860440  | L |
| C-CT--0.025200 | -1 | 1.277365  | -5.816653 | 4.256877  | L |
| C-C-0.597300   | 0  | 1.155189  | -6.529544 | 2.909242  | L |
| O-O--0.567900  | 0  | 1.749282  | -7.579138 | 2.672347  | L |
| H-H-0.271900   | 0  | -0.778071 | -6.277298 | 4.634682  | L |
| H-H1-0.069800  | 0  | 1.899303  | -6.419158 | 4.919040  | L |
| H-H1-0.069800  | 0  | 1.768516  | -4.857206 | 4.090946  | L |
| N-N--0.415700  | 0  | 0.333644  | -5.945503 | 2.041874  | L |
| C-CT--0.025200 | -1 | -0.231994 | -6.538011 | 0.833289  | L |
| C-C-0.597300   | 0  | -1.368613 | -5.650941 | 0.391529  | L |
| O-O--0.567900  | 0  | -2.258154 | -5.391964 | 1.193881  | L |
| H-H-0.271900   | 0  | -0.115289 | -5.103323 | 2.376564  | L |
| H-H1-0.069800  | 0  | -0.616680 | -7.533458 | 1.055082  | L |
| H-H1-0.069800  | 0  | 0.533800  | -6.597898 | 0.059451  | L |
| N-N--0.4157    | 0  | -1.319033 | -5.180163 | -0.853712 | L |
| C-CT--0.0014   | -1 | -2.156600 | -4.097987 | -1.372923 | L |
| C-C-0.5973     | 0  | -3.622197 | -4.172497 | -0.931527 | L |
| O-O--0.5679    | 0  | -4.187979 | -3.201358 | -0.439965 | L |
| C-CT--0.0152   | 0  | -2.056998 | -4.069410 | -2.911737 | L |
| C-CA--0.0011   | 0  | -0.664356 | -4.240684 | -3.493972 | L |
| C-CA--0.1906   | 0  | 0.345830  | -3.302562 | -3.208965 | L |
| C-CA--0.1906   | 0  | -0.384097 | -5.338645 | -4.332251 | L |
| C-CA--0.2341   | 0  | 1.634187  | -3.463221 | -3.753045 | L |
| C-CA--0.2341   | 0  | 0.902313  | -5.502122 | -4.880569 | L |
| C-C-0.3226     | 0  | 1.915518  | -4.562497 | -4.589757 | L |
| O-OH--0.5579   | 0  | 3.152418  | -4.718331 | -5.131667 | L |
| H-H-0.2719     | 0  | -0.495287 | -5.389483 | -1.399552 | L |
| H-H1-0.0876    | 0  | -1.751899 | -3.159264 | -0.994347 | L |
| H-HC-0.0295    | 0  | -2.452325 | -3.122042 | -3.271083 | L |
| H-HC-0.0295    | 0  | -2.697747 | -4.851747 | -3.319379 | L |
| H-HA-0.1699    | 0  | 0.138958  | -2.449874 | -2.573456 | L |
| H-HA-0.1699    | 0  | -1.163902 | -6.046727 | -4.572251 | L |
| H-HA-0.1656    | 0  | 2.408024  | -2.744307 | -3.527886 | L |
| H-HA-0.1656    | 0  | 1.109006  | -6.336662 | -5.530484 | L |
| H-HO-0.3992    | 0  | 3.178664  | -5.470188 | -5.721307 | L |
| N-N--0.415700  | 0  | -4.219884 | -5.355177 | -1.090787 | L |
| C-CT--0.024900 | -1 | -5.557795 | -5.641673 | -0.594754 | L |
| C-C-0.597300   | 0  | -5.686887 | -5.566076 | 0.924753  | L |
| O-O--0.567900  | 0  | -5.055295 | -6.327044 | 1.666920  | L |
| C-CT-0.211700  | 0  | -6.020961 | -7.035310 | -1.023407 | L |
| O-OH--0.654600 | -1 | -7.278604 | -7.341853 | -0.437163 | L |
| H-H-0.271900   | 0  | -3.643331 | -6.098451 | -1.442000 | L |
| H-H1-0.084300  | 0  | -6.242964 | -4.917086 | -1.035241 | L |
| H-H1-0.035200  | 0  | -5.288329 | -7.773729 | -0.695557 | L |

|                |    |            |            |           |   |      |     |
|----------------|----|------------|------------|-----------|---|------|-----|
| H-H1-0.035200  | 0  | -6.098699  | -7.073627  | -2.109960 | L |      |     |
| H-HO-0.427500  | -1 | -7.536326  | -8.213515  | -0.747131 | L |      |     |
| N-N--0.415700  | 0  | -6.660176  | -4.766299  | 1.353695  | L |      |     |
| C-CT-0.033700  | -1 | -7.155820  | -4.674595  | 2.715616  | L |      |     |
| C-C-0.597300   | 0  | -7.510816  | -6.003024  | 3.388628  | L |      |     |
| O-O--0.567900  | 0  | -7.444353  | -6.110160  | 4.611295  | L |      |     |
| C-CT--0.182500 | 0  | -8.347612  | -3.716913  | 2.719979  | L |      |     |
| H-H-0.271900   | 0  | -7.119112  | -4.184316  | 0.659577  | L |      |     |
| H-H1-0.082300  | 0  | -6.369298  | -4.226871  | 3.322259  | L |      |     |
| H-HC-0.060300  | 0  | -8.058281  | -2.749906  | 2.304440  | L |      |     |
| H-HC-0.060300  | 0  | -8.692568  | -3.577517  | 3.739869  | L |      |     |
| H-HC-0.060300  | 0  | -9.161285  | -4.139245  | 2.136102  | L |      |     |
| N-N--0.415700  | 0  | -7.900826  | -7.007431  | 2.603150  | L |      |     |
| C-CT--0.025200 | -1 | -8.282255  | -8.320776  | 3.107793  | L |      |     |
| C-C-0.597300   | 0  | -7.322427  | -9.447866  | 2.748856  | L |      |     |
| O-O--0.567900  | 0  | -7.736424  | -10.602900 | 2.676810  | L |      |     |
| H-H-0.271900   | 0  | -7.884418  | -6.838933  | 1.603706  | L |      |     |
| H-H1-0.069800  | 0  | -9.259424  | -8.575722  | 2.698744  | L |      |     |
| H-H1-0.069800  | 0  | -8.378904  | -8.302200  | 4.193599  | L |      |     |
| N-N--0.415700  | 0  | -6.040029  | -9.135768  | 2.567456  | L |      |     |
| C-CT--0.024900 | -1 | -4.966292  | -10.129069 | 2.581156  | L |      |     |
| C-C-0.597300   | 0  | -4.267166  | -10.095709 | 3.934280  | L |      |     |
| O-O--0.567900  | 0  | -3.946555  | -9.021646  | 4.452642  | L |      |     |
| C-CT-0.211700  | 0  | -3.973005  | -9.833992  | 1.452541  | L |      |     |
| O-OH--0.654600 | -1 | -3.087524  | -10.926481 | 1.261541  | L |      |     |
| H-H-0.271900   | 0  | -5.786161  | -8.154398  | 2.633208  | L |      |     |
| H-H1-0.084300  | 0  | -5.377990  | -11.124346 | 2.413234  | L |      |     |
| H-H1-0.035200  | 0  | -3.408332  | -8.928414  | 1.680863  | L |      |     |
| H-H1-0.035200  | 0  | -4.529725  | -9.674173  | 0.528350  | L |      |     |
| H-HO-0.427500  | -1 | -2.546738  | -10.736134 | 0.491496  | L |      |     |
| N-N--0.4157    | 0  | -4.068388  | -11.274577 | 4.522972  | L |      |     |
| C-CT--0.1490   | -1 | -3.530927  | -11.424593 | 5.864135  | L |      |     |
| H-H-0.2719     | 0  | -4.347721  | -12.092612 | 4.005203  | L |      |     |
| H-H1-0.0976    | 0  | -3.324097  | -12.473886 | 6.074718  | L |      |     |
| H-H1-0.0976    | 0  | -4.246950  | -11.043987 | 6.595872  | L |      |     |
| H-H1-0.0976    | 0  | -2.605647  | -10.851446 | 5.960756  | L |      |     |
| C-CT--0.3662   | -1 | -12.136560 | 5.091257   | -0.632643 | L |      |     |
| C-C-0.5972     | 0  | -10.707418 | 5.268437   | -0.192197 | L |      |     |
| O-O--0.5679    | 0  | -10.389640 | 4.988615   | 0.958174  | L |      |     |
| H-HC-0.1123    | 0  | -12.530076 | 6.047417   | -0.970669 | L |      |     |
| H-HC-0.1123    | 0  | -12.722374 | 4.731731   | 0.211790  | L |      |     |
| H-HC-0.1123    | 0  | -12.172561 | 4.358441   | -1.436658 | L |      |     |
| N-N--0.415700  | 0  | -9.858293  | 5.721525   | -1.109964 | L |      |     |
| C-CT--0.025200 | -1 | -8.424581  | 5.881927   | -0.882294 | L |      |     |
| C-C-0.597300   | 0  | -7.610289  | 5.759864   | -2.146502 | L |      |     |
| O-O--0.567900  | 0  | -8.115561  | 6.060961   | -3.234108 | L |      |     |
| H-H-0.271900   | 0  | -10.173522 | 5.892622   | -2.052579 | L |      |     |
| H-H1-0.069800  | 0  | -8.113290  | 5.097494   | -0.202737 | L |      |     |
| H-H1-0.069800  | 0  | -8.221678  | 6.849080   | -0.424522 | L |      |     |
| N-N--0.415700  | 0  | -6.354231  | 5.341273   | -1.973557 | L | H-H1 | 489 |
| C-CT--0.530209 | -1 | -5.339924  | 5.312472   | -3.028166 | H |      |     |
| C-C-0.568093   | 0  | -4.530756  | 4.030573   | -2.926729 | H |      |     |
| O-O--0.528105  | 0  | -4.363963  | 3.467688   | -1.825648 | H |      |     |
| C-CT-0.298500  | 0  | -4.439415  | 6.569814   | -2.968244 | L | H-H1 | 489 |

|                |    |           |           |            |   |      |     |
|----------------|----|-----------|-----------|------------|---|------|-----|
| C-CT--0.319200 | 0  | -5.230158 | 7.829161  | -3.327861  | L |      |     |
| C-CT--0.319200 | 0  | -3.773881 | 6.767445  | -1.602910  | L |      |     |
| H-H-0.271900   | 0  | -6.062990 | 5.061748  | -1.038414  | L |      |     |
| H-H1-0.184096  | 0  | -5.862459 | 5.343348  | -3.990202  | H |      |     |
| H-HC--0.029700 | 0  | -3.651867 | 6.463277  | -3.713315  | L |      |     |
| H-HC-0.079100  | 0  | -5.973642 | 8.036873  | -2.560083  | L |      |     |
| H-HC-0.079100  | 0  | -5.730999 | 7.684621  | -4.284096  | L |      |     |
| H-HC-0.079100  | 0  | -4.548446 | 8.675296  | -3.403952  | L |      |     |
| H-HC-0.079100  | 0  | -4.523662 | 6.897576  | -0.823996  | L |      |     |
| H-HC-0.079100  | 0  | -3.131211 | 7.645753  | -1.629186  | L |      |     |
| H-HC-0.079100  | 0  | -3.164611 | 5.897883  | -1.356189  | L |      |     |
| N-N--0.610103  | 0  | -3.964969 | 3.568498  | -4.052480  | H |      |     |
| C-CT--0.314060 | -1 | -4.227695 | 4.026890  | -5.408389  | H |      |     |
| C-C-0.597300   | 0  | -5.351179 | 3.212897  | -6.034199  | L | H-H1 | 505 |
| O-O--0.567900  | 0  | -5.485858 | 2.011239  | -5.804937  | L |      |     |
| C-CT--0.110200 | 0  | -2.937257 | 3.897030  | -6.253153  | L | H-H1 | 505 |
| C-CT-0.353100  | 0  | -1.854082 | 4.965389  | -5.970766  | L |      |     |
| C-CT--0.412100 | 0  | -1.076080 | 4.755729  | -4.668133  | L |      |     |
| C-CT--0.412100 | 0  | -0.829770 | 4.964261  | -7.109214  | L |      |     |
| H-H-0.398207   | 0  | -3.428715 | 2.693555  | -3.960551  | H |      |     |
| H-H1-0.165130  | 0  | -4.517614 | 5.076738  | -5.410670  | H |      |     |
| H-HC-0.045700  | 0  | -3.224438 | 3.990988  | -7.300784  | L |      |     |
| H-HC-0.045700  | 0  | -2.509949 | 2.902626  | -6.123464  | L |      |     |
| H-HC--0.036100 | 0  | -2.323998 | 5.949145  | -5.947154  | L |      |     |
| H-HC-0.100000  | 0  | -0.656258 | 3.752084  | -4.642118  | L |      |     |
| H-HC-0.100000  | 0  | -1.741313 | 4.884775  | -3.816259  | L |      |     |
| H-HC-0.100000  | 0  | -0.277977 | 5.492357  | -4.586318  | L |      |     |
| H-HC-0.100000  | 0  | -0.327617 | 3.999067  | -7.154227  | L |      |     |
| H-HC-0.100000  | 0  | -0.090084 | 5.746163  | -6.937214  | L |      |     |
| H-HC-0.100000  | 0  | -1.329359 | 5.159252  | -8.056825  | L |      |     |
| N-N--0.415700  | 0  | -6.133202 | 3.861954  | -6.892195  | L |      |     |
| C-CT--0.038900 | -1 | -7.318905 | 3.265714  | -7.519958  | L |      |     |
| C-C-0.597300   | 0  | -7.067430 | 1.929093  | -8.206351  | L |      |     |
| O-O--0.567900  | 0  | -7.936358 | 1.060313  | -8.226267  | L |      |     |
| C-CT-0.365400  | -1 | -7.955694 | 4.193846  | -8.578748  | L |      |     |
| O-OH--0.676100 | -1 | -7.893614 | 5.549547  | -8.126340  | L |      |     |
| C-CT--0.243800 | 0  | -9.432838 | 3.899955  | -8.838605  | L |      |     |
| H-H-0.271900   | 0  | -6.005494 | 4.858389  | -6.990892  | L |      |     |
| H-H1-0.100700  | 0  | -8.061356 | 3.121989  | -6.741729  | L |      |     |
| H-H1-0.004300  | 0  | -7.400091 | 4.120324  | -9.514612  | L |      |     |
| H-HC-0.064200  | 0  | -9.545359 | 2.894342  | -9.243788  | L |      |     |
| H-HC-0.064200  | 0  | -9.827531 | 4.610848  | -9.564396  | L |      |     |
| H-HC-0.064200  | 0  | -9.998290 | 3.972805  | -7.908790  | L |      |     |
| H-HO-0.410200  | -1 | -8.791703 | 5.884943  | -8.089911  | L |      |     |
| N-N--0.415700  | 0  | -5.897608 | 1.802557  | -8.829972  | L |      |     |
| C-CT--0.025200 | -1 | -5.512373 | 0.642724  | -9.621846  | L |      |     |
| C-C-0.597300   | 0  | -4.593552 | -0.345903 | -8.936781  | L |      |     |
| O-O--0.567900  | 0  | -4.084839 | -1.238007 | -9.615332  | L |      |     |
| H-H-0.271900   | 0  | -5.220910 | 2.533380  | -8.672196  | L |      |     |
| H-H1-0.069800  | 0  | -5.002988 | 0.988104  | -10.520391 | L |      |     |
| H-H1-0.069800  | 0  | -6.400465 | 0.095664  | -9.938490  | L |      |     |
| N-N--0.415700  | 0  | -4.377565 | -0.171752 | -7.628133  | L | H-H1 | 545 |
| C-CT--0.539097 | -1 | -3.470133 | -0.978240 | -6.822772  | H |      |     |
| C-C-0.572106   | 0  | -4.229265 | -1.421564 | -5.568674  | H |      |     |

|                |    |            |           |           |   |      |     |
|----------------|----|------------|-----------|-----------|---|------|-----|
| O-O--0.533001  | 0  | -4.970870  | -2.399337 | -5.660993 | H |      |     |
| C-CT-0.130300  | 0  | -2.090455  | -0.294446 | -6.644426 | L | H-H1 | 545 |
| C-CT--0.043000 | 0  | -1.454161  | 0.123787  | -7.991155 | L |      |     |
| C-CT--0.320400 | 0  | -1.182837  | -1.295210 | -5.907510 | L |      |     |
| C-CT--0.066000 | 0  | -0.094703  | 0.823703  | -7.862816 | L |      |     |
| H-H-0.271900   | 0  | -4.857223  | 0.587402  | -7.153758 | L |      |     |
| H-H1-0.180646  | 0  | -3.294672  | -1.906910 | -7.377252 | H |      |     |
| H-HC-0.018700  | 0  | -2.214091  | 0.599868  | -6.041767 | L |      |     |
| H-HC-0.023600  | 0  | -2.118946  | 0.827014  | -8.491297 | L |      |     |
| H-HC-0.023600  | 0  | -1.343426  | -0.753886 | -8.629238 | L |      |     |
| H-HC-0.088200  | 0  | -1.077869  | -2.208239 | -6.492422 | L |      |     |
| H-HC-0.088200  | 0  | -1.604563  | -1.543939 | -4.935574 | L |      |     |
| H-HC-0.088200  | 0  | -0.198870  | -0.871691 | -5.726911 | L |      |     |
| H-HC-0.018600  | 0  | -0.166257  | 1.641569  | -7.147031 | L |      |     |
| H-HC-0.018600  | 0  | 0.196684   | 1.224534  | -8.833713 | L |      |     |
| H-HC-0.018600  | 0  | 0.668881   | 0.118490  | -7.537727 | L |      |     |
| N-N--0.611145  | 0  | -4.091815  | -0.671215 | -4.448393 | H |      |     |
| C-CT--0.109296 | -1 | -4.635229  | -1.091476 | -3.161273 | H |      |     |
| C-C-0.597300   | 0  | -6.162883  | -1.085929 | -3.135893 | L | H-H1 | 564 |
| O-O--0.567900  | 0  | -6.796713  | -1.994558 | -2.589085 | L |      |     |
| C-CT--0.388038 | 0  | -4.041894  | -0.270950 | -2.032454 | H |      |     |
| H-H-0.369964   | 0  | -3.392108  | 0.071369  | -4.395962 | H |      |     |
| H-H1-0.178541  | 0  | -4.382385  | -2.142282 | -2.987412 | H |      |     |
| H-H1-0.157964  | 0  | -4.518038  | -0.591203 | -1.098368 | H |      |     |
| H-H1-0.179833  | 0  | -4.255310  | 0.793393  | -2.158125 | H |      |     |
| H-HS-0.319500  | 0  | -1.776502  | 1.767174  | -0.521587 | H |      |     |
| N-N--0.415700  | 0  | -6.752840  | -0.104607 | -3.808142 | L |      |     |
| C-CT--0.087500 | -1 | -8.191392  | -0.047246 | -4.054491 | L |      |     |
| C-C-0.597300   | 0  | -8.669686  | -1.200340 | -4.922468 | L |      |     |
| O-O--0.567900  | 0  | -9.597209  | -1.911763 | -4.538942 | L |      |     |
| C-CT-0.298500  | 0  | -8.597017  | 1.314953  | -4.635194 | L |      |     |
| C-CT--0.319200 | 0  | -10.113193 | 1.432401  | -4.841190 | L |      |     |
| C-CT--0.319200 | 0  | -8.165896  | 2.484535  | -3.735870 | L |      |     |
| H-H-0.271900   | 0  | -6.116478  | 0.550730  | -4.254867 | L |      |     |
| H-H1-0.096900  | 0  | -8.695703  | -0.152135 | -3.095892 | L |      |     |
| H-HC--0.029700 | 0  | -8.111807  | 1.413640  | -5.597307 | L |      |     |
| H-HC-0.079100  | 0  | -10.629684 | 1.271708  | -3.894526 | L |      |     |
| H-HC-0.079100  | 0  | -10.451964 | 0.693574  | -5.567360 | L |      |     |
| H-HC-0.079100  | 0  | -10.357025 | 2.423330  | -5.223242 | L |      |     |
| H-HC-0.079100  | 0  | -8.626702  | 2.400704  | -2.753130 | L |      |     |
| H-HC-0.079100  | 0  | -8.452769  | 3.433254  | -4.188651 | L |      |     |
| H-HC-0.079100  | 0  | -7.082474  | 2.494535  | -3.611413 | L |      |     |
| N-N--0.415700  | 0  | -8.045332  | -1.397607 | -6.081994 | L |      |     |
| C-CT--0.025200 | -1 | -8.401922  | -2.454600 | -7.024973 | L |      |     |
| C-C-0.597300   | 0  | -8.317233  | -3.857548 | -6.436584 | L |      |     |
| O-O--0.567900  | 0  | -9.219829  | -4.668965 | -6.628838 | L |      |     |
| H-H-0.271900   | 0  | -7.263363  | -0.792703 | -6.297019 | L |      |     |
| H-H1-0.069800  | 0  | -7.731852  | -2.404078 | -7.882930 | L |      |     |
| H-H1-0.069800  | 0  | -9.421217  | -2.291011 | -7.374408 | L |      |     |
| N-N--0.415700  | 0  | -7.233486  | -4.137371 | -5.715374 | L |      |     |
| C-CT--0.025200 | -1 | -7.009276  | -5.404163 | -5.030212 | L |      |     |
| C-C-0.597300   | 0  | -7.932864  | -5.665285 | -3.851358 | L |      |     |
| O-O--0.567900  | 0  | -8.253962  | -6.818578 | -3.571330 | L |      |     |
| H-H-0.271900   | 0  | -6.517034  | -3.416345 | -5.651862 | L |      |     |

|                |    |            |           |           |   |
|----------------|----|------------|-----------|-----------|---|
| H-H1-0.069800  | 0  | -5.983175  | -5.426751 | -4.665032 | L |
| H-H1-0.069800  | 0  | -7.135740  | -6.219251 | -5.743029 | L |
| N-N--0.415700  | 0  | -8.328672  | -4.607881 | -3.145635 | L |
| C-CT--0.038900 | -1 | -9.379716  | -4.674793 | -2.127616 | L |
| C-C-0.597300   | 0  | -10.749054 | -4.967846 | -2.731965 | L |
| O-O--0.567900  | 0  | -11.492102 | -5.804483 | -2.219145 | L |
| C-CT-0.365400  | 0  | -9.424174  | -3.379142 | -1.303280 | L |
| O-OH--0.676100 | 0  | -8.190148  | -3.210481 | -0.643959 | L |
| C-CT--0.243800 | 0  | -10.511545 | -3.402162 | -0.229430 | L |
| H-H-0.271900   | 0  | -7.958520  | -3.700020 | -3.402602 | L |
| H-H1-0.100700  | 0  | -9.150662  | -5.493696 | -1.445665 | L |
| H-H1-0.004300  | 0  | -9.593999  | -2.524139 | -1.957727 | L |
| H-HC-0.064200  | 0  | -11.491980 | -3.296425 | -0.692610 | L |
| H-HC-0.064200  | 0  | -10.361103 | -2.576279 | 0.465269  | L |
| H-HC-0.064200  | 0  | -10.475057 | -4.345450 | 0.313862  | L |
| H-HO-0.410200  | 0  | -7.603517  | -2.739174 | -1.270873 | L |
| N-N--0.4157    | 0  | -11.098286 | -4.257750 | -3.805793 | L |
| C-CT--0.1490   | -1 | -12.331807 | -4.443812 | -4.541367 | L |
| H-H-0.2719     | 0  | -10.430439 | -3.575217 | -4.152828 | L |
| H-H1-0.0976    | 0  | -12.403437 | -3.693353 | -5.329548 | L |
| H-H1-0.0976    | 0  | -13.183407 | -4.351357 | -3.865913 | L |
| H-H1-0.0976    | 0  | -12.336480 | -5.438021 | -4.991425 | L |
| N-N2--0.511415 | 0  | 1.946967   | -0.021592 | -1.688800 | H |
| C-CA-0.057801  | 0  | 0.654930   | 0.320378  | -1.611646 | H |
| C-CA-0.063496  | 0  | -0.059365  | 0.834927  | -2.697125 | H |
| C-CA--0.109122 | 0  | 0.620500   | 1.047112  | -3.893089 | H |
| C-CA--0.164490 | 0  | 1.970960   | 0.720359  | -3.968427 | H |
| C-CA-0.098392  | 0  | 2.589489   | 0.168836  | -2.851988 | H |
| C-C-0.541263   | 0  | -1.565083  | 1.100122  | -2.651691 | H |
| O-O--0.574884  | 0  | -2.116632  | 1.472120  | -3.752405 | H |
| N-N--0.751108  | 0  | -1.813034  | 2.172839  | -1.513700 | H |
| H-H4-0.220889  | 0  | 0.180350   | 0.172647  | -0.646717 | H |
| H-HA-0.160434  | 0  | 0.065512   | 1.443033  | -4.735841 | H |
| H-HA-0.142191  | 0  | 2.540806   | 0.882224  | -4.877378 | H |
| H-H4-0.174502  | 0  | 3.628194   | -0.141623 | -2.878186 | H |
| H-H-0.412468   | 0  | -2.764400  | 2.574101  | -1.657606 | H |
| H-H-0.353801   | 0  | -1.145954  | 2.947996  | -1.596958 | H |
| Zn-ZN-0.974537 | 0  | 2.856986   | -1.091423 | -0.013925 | H |
| O-OW--0.834000 | 0  | -2.131071  | -7.247835 | 3.472417  | L |
| H-HW-0.417000  | 0  | -2.585537  | -6.663113 | 2.846528  | L |
| H-HW-0.417000  | 0  | -2.842675  | -7.808872 | 3.822965  | L |
| O-OW--0.783903 | 0  | 1.326667   | -2.565180 | -0.129475 | H |
| H-HW-0.401253  | 0  | 0.958448   | -2.468199 | 0.785759  | H |
| H-HW-0.424111  | 0  | 1.940277   | -3.341932 | -0.189199 | H |
| O-OW--0.834000 | 0  | -3.635179  | -8.455293 | 7.197501  | L |
| H-HW-0.417000  | 0  | -3.724945  | -7.515233 | 7.373504  | L |
| H-HW-0.417000  | 0  | -3.771620  | -8.530050 | 6.241069  | L |
| O-OW--0.834000 | 0  | 7.198088   | -0.014210 | 1.814099  | L |
| H-HW-0.417000  | 0  | 6.888443   | 0.370486  | 2.653477  | L |
| H-HW-0.417000  | 0  | 6.414680   | 0.099005  | 1.253597  | L |
| O-OW--0.834000 | 0  | 7.056691   | -4.958131 | 4.749628  | L |
| H-HW-0.417000  | 0  | 6.107319   | -5.026394 | 4.978937  | L |
| H-HW-0.417000  | 0  | 7.275343   | -5.842259 | 4.452230  | L |
| O-OW--0.834000 | 0  | 8.572762   | -0.936592 | -0.297808 | L |

|                |   |           |           |           |   |
|----------------|---|-----------|-----------|-----------|---|
| H-HW-0.417000  | 0 | 8.149138  | -0.560262 | 0.499752  | L |
| H-HW-0.417000  | 0 | 8.825975  | -0.146036 | -0.795554 | L |
| O-OW--0.834000 | 0 | 12.622518 | -1.065654 | -1.923067 | L |
| H-HW-0.417000  | 0 | 11.781451 | -0.817625 | -2.343766 | L |
| H-HW-0.417000  | 0 | 12.644460 | -2.025995 | -2.054649 | L |
| O-OW--0.834000 | 0 | 8.270287  | -3.301423 | 0.969105  | L |
| H-HW-0.417000  | 0 | 8.456052  | -2.539686 | 0.381771  | L |
| H-HW-0.417000  | 0 | 7.565671  | -2.958140 | 1.528179  | L |
| O-OW--0.834000 | 0 | 4.366073  | -4.922064 | 5.152319  | L |
| H-HW-0.417000  | 0 | 4.096580  | -4.544244 | 6.012326  | L |
| H-HW-0.417000  | 0 | 4.055456  | -4.255509 | 4.529379  | L |
| S-SH--0.326142 | 0 | -2.240945 | -0.557307 | -1.886767 | H |

**TS2**

|                |    |            |           |           |           |
|----------------|----|------------|-----------|-----------|-----------|
| C-CT--0.366200 | -1 | -10.312375 | 3.923597  | 4.029548  | L         |
| C-C-0.597200   | 0  | -8.976347  | 3.283860  | 3.782839  | L         |
| O-O--0.567900  | 0  | -8.397071  | 2.713697  | 4.700529  | L         |
| H-HC-0.112300  | 0  | -11.052219 | 3.458054  | 3.381340  | L         |
| H-HC-0.112300  | 0  | -10.242979 | 4.986748  | 3.806316  | L         |
| H-HC-0.112300  | 0  | -10.589811 | 3.780033  | 5.071554  | L         |
| N-N--0.415700  | 0  | -8.510913  | 3.380649  | 2.543401  | L         |
| C-CT--0.059700 | -1 | -7.343618  | 2.657464  | 2.031481  | L         |
| C-C-0.597300   | 0  | -6.181932  | 3.621162  | 1.828452  | L         |
| O-O--0.567900  | 0  | -6.291754  | 4.574018  | 1.061819  | L         |
| C-CT-0.130300  | 0  | -7.694875  | 1.901197  | 0.724487  | L         |
| C-CT--0.043000 | 0  | -8.879755  | 0.925535  | 0.937800  | L         |
| C-CT--0.320400 | 0  | -6.467481  | 1.125918  | 0.207920  | L         |
| C-CT--0.066000 | 0  | -9.427250  | 0.313468  | -0.356855 | L         |
| H-H-0.271900   | 0  | -9.055479  | 3.935247  | 1.891117  | L         |
| H-H1-0.086900  | 0  | -7.036537  | 1.912020  | 2.764882  | L         |
| H-HC-0.018700  | 0  | -7.982465  | 2.634354  | -0.031471 | L         |
| H-HC-0.023600  | 0  | -9.710850  | 1.453025  | 1.404229  | L         |
| H-HC-0.023600  | 0  | -8.574691  | 0.121823  | 1.609076  | L         |
| H-HC-0.088200  | 0  | -6.147016  | 0.384137  | 0.940364  | L         |
| H-HC-0.088200  | 0  | -5.639181  | 1.806777  | 0.009425  | L         |
| H-HC-0.088200  | 0  | -6.696572  | 0.628989  | -0.732559 | L         |
| H-HC-0.018600  | 0  | -9.666616  | 1.102202  | -1.069260 | L         |
| H-HC-0.018600  | 0  | -10.336833 | -0.243009 | -0.133729 | L         |
| H-HC-0.018600  | 0  | -8.699629  | -0.370224 | -0.790958 | L         |
| N-N--0.516300  | 0  | -5.087835  | 3.367677  | 2.540010  | L         |
| C-CT-0.038100  | -1 | -3.776387  | 3.986351  | 2.403325  | L H-HC 30 |
| C-C-0.536600   | 0  | -3.695354  | 5.504316  | 2.143616  | L         |
| O-O--0.581900  | 0  | -2.711075  | 6.018786  | 1.609149  | L         |
| C-CT--0.547145 | 0  | -3.003571  | 3.161579  | 1.370145  | H         |
| C-C-0.532653   | 0  | -2.589983  | 1.777814  | 1.847481  | H         |
| O-O2--0.588507 | 0  | -2.757396  | 1.425950  | 3.020265  | H         |
| O-O2--0.625559 | 0  | -2.029538  | 1.033755  | 0.943606  | H         |
| H-H-0.293600   | 0  | -5.087996  | 2.518245  | 3.092898  | L         |
| H-H1-0.088000  | 0  | -3.263205  | 3.853900  | 3.356662  | L         |
| H-HC-0.128435  | 0  | -2.079253  | 3.697851  | 1.109426  | H         |
| H-HC-0.183556  | 0  | -3.580106  | 3.115701  | 0.441830  | H         |
| N-N--0.415700  | 0  | -4.670251  | 6.258676  | 2.633745  | L         |
| C-CT--0.025200 | -1 | -4.647973  | 7.705215  | 2.536826  | L         |
| C-C-0.597300   | 0  | -3.754436  | 8.326363  | 3.595128  | L         |

|                |    |           |           |           |   |
|----------------|----|-----------|-----------|-----------|---|
| O-O--0.567900  | 0  | -4.234303 | 8.950327  | 4.541907  | L |
| H-H-0.271900   | 0  | -5.481830 | 5.762401  | 2.966787  | L |
| H-H1-0.069800  | 0  | -5.659167 | 8.086970  | 2.670540  | L |
| H-H1-0.069800  | 0  | -4.295706 | 8.008449  | 1.549719  | L |
| N-N--0.415700  | 0  | -2.449511 | 8.141383  | 3.430787  | L |
| C-CT--0.038900 | -1 | -1.426466 | 8.557785  | 4.383796  | L |
| C-C-0.597300   | 0  | -0.520177 | 9.647984  | 3.802443  | L |
| O-O--0.567900  | 0  | -0.620564 | 10.027616 | 2.634311  | L |
| C-CT-0.365400  | 0  | -0.564564 | 7.381828  | 4.882255  | L |
| O-OH--0.676100 | 0  | 0.480116  | 7.127472  | 3.979514  | L |
| C-CT--0.243800 | 0  | -1.331249 | 6.085699  | 5.128582  | L |
| H-H-0.271900   | 0  | -2.175275 | 7.570521  | 2.634070  | L |
| H-H1-0.100700  | 0  | -1.919668 | 8.982601  | 5.256448  | L |
| H-H1-0.004300  | 0  | -0.111830 | 7.682560  | 5.827684  | L |
| H-HC-0.064200  | 0  | -2.196079 | 6.282656  | 5.760948  | L |
| H-HC-0.064200  | 0  | -0.677739 | 5.373367  | 5.625946  | L |
| H-HC-0.064200  | 0  | -1.657384 | 5.655028  | 4.182067  | L |
| H-HO-0.410200  | 0  | 1.029090  | 6.405912  | 4.355141  | L |
| N-N--0.415700  | 0  | 0.404259  | 10.145797 | 4.628054  | L |
| C-CT--0.025200 | -1 | 1.444579  | 11.081873 | 4.209650  | L |
| C-C-0.597300   | 0  | 2.317485  | 10.593246 | 3.061142  | L |
| O-O--0.567900  | 0  | 2.589544  | 11.347842 | 2.132674  | L |
| H-H-0.271900   | 0  | 0.454388  | 9.759974  | 5.555728  | L |
| H-H1-0.069800  | 0  | 2.097175  | 11.299482 | 5.054153  | L |
| H-H1-0.069800  | 0  | 0.974114  | 12.013441 | 3.894047  | L |
| N-N--0.516300  | 0  | 2.752665  | 9.338767  | 3.139048  | L |
| C-CT-0.038100  | -1 | 3.650382  | 8.728931  | 2.159920  | L |
| C-C-0.536600   | 0  | 3.011912  | 8.409255  | 0.820638  | L |
| O-O--0.581900  | 0  | 3.740256  | 8.082596  | -0.110010 | L |
| C-CT--0.030300 | 0  | 4.225858  | 7.417041  | 2.724406  | L |
| C-C-0.799400   | -1 | 5.578066  | 7.610280  | 3.387226  | L |
| O-O2--0.801400 | -1 | 6.159777  | 8.713993  | 3.309307  | L |
| O-O2--0.801400 | -1 | 6.035970  | 6.654542  | 4.046096  | L |
| H-H-0.293600   | 0  | 2.443040  | 8.756431  | 3.901334  | L |
| H-H1-0.088000  | 0  | 4.455493  | 9.428565  | 1.932068  | L |
| H-HC--0.012200 | 0  | 4.367911  | 6.686152  | 1.926545  | L |
| H-HC--0.012200 | 0  | 3.524256  | 6.978851  | 3.436979  | L |
| N-N--0.415700  | 0  | 1.689996  | 8.493176  | 0.706151  | L |
| C-CT--0.002400 | -1 | 0.983366  | 8.329183  | -0.557726 | L |
| C-C-0.597300   | 0  | 0.413526  | 9.637786  | -1.101772 | L |
| O-O--0.567900  | 0  | 0.371031  | 9.838082  | -2.315701 | L |
| C-CT--0.034300 | 0  | -0.123215 | 7.273134  | -0.410905 | L |
| C-CA-0.011800  | 0  | 0.364365  | 5.850250  | -0.190148 | L |
| C-CA--0.125600 | 0  | 0.821586  | 5.079731  | -1.276652 | L |
| C-CA--0.125600 | 0  | 0.317446  | 5.274071  | 1.092249  | L |
| C-CA--0.170400 | 0  | 1.223412  | 3.746490  | -1.075180 | L |
| C-CA--0.170400 | 0  | 0.727871  | 3.945396  | 1.296208  | L |
| C-CA--0.107200 | 0  | 1.180426  | 3.181009  | 0.209668  | L |
| H-H-0.271900   | 0  | 1.169288  | 8.710857  | 1.543692  | L |
| H-H1-0.097800  | 0  | 1.670555  | 7.962067  | -1.320012 | L |
| H-HC-0.029500  | 0  | -0.718438 | 7.274943  | -1.324485 | L |
| H-HC-0.029500  | 0  | -0.786316 | 7.562568  | 0.405854  | L |
| H-HA-0.133000  | 0  | 0.851970  | 5.510549  | -2.266650 | L |
| H-HA-0.133000  | 0  | -0.071231 | 5.845190  | 1.918994  | L |



|                |    |           |           |           |   |
|----------------|----|-----------|-----------|-----------|---|
| H-HA-0.143000  | 0  | 1.555341  | 3.140864  | -1.903340 | L |
| H-HA-0.143000  | 0  | 0.664539  | 3.505245  | 2.281146  | L |
| H-HA-0.129700  | 0  | 1.478623  | 2.153653  | 0.359366  | L |
| N-N--0.415700  | 0  | -0.020282 | 10.537844 | -0.218600 | L |
| C-CT--0.149000 | -1 | -0.460848 | 11.865027 | -0.592497 | L |
| H-H-0.271900   | 0  | 0.005611  | 10.290200 | 0.765221  | L |
| H-H1-0.097600  | 0  | -0.820100 | 12.392485 | 0.291761  | L |
| H-H1-0.097600  | 0  | -1.265379 | 11.791925 | -1.326152 | L |
| H-H1-0.097600  | 0  | 0.373767  | 12.415678 | -1.029169 | L |
| C-CT--0.366200 | -1 | 7.993058  | 8.434760  | -0.115072 | L |
| C-C-0.597200   | 0  | 7.526682  | 7.661370  | -1.323997 | L |
| O-O--0.567900  | 0  | 8.342745  | 7.347786  | -2.186907 | L |
| H-HC-0.112300  | 0  | 7.516577  | 9.412608  | -0.103054 | L |
| H-HC-0.112300  | 0  | 9.074112  | 8.547260  | -0.155906 | L |
| H-HC-0.112300  | 0  | 7.723294  | 7.888523  | 0.789589  | L |
| N-N--0.415700  | 0  | 6.218743  | 7.398393  | -1.411709 | L |
| C-CT--0.051800 | -1 | 5.572637  | 6.868313  | -2.621607 | L |
| C-C-0.597300   | 0  | 4.858545  | 7.944622  | -3.436096 | L |
| O-O--0.567900  | 0  | 5.035477  | 8.052494  | -4.649189 | L |
| C-CT--0.110200 | 0  | 4.701467  | 5.628289  | -2.329982 | L |
| C-CT-0.353100  | 0  | 5.080671  | 4.439241  | -3.239367 | L |
| C-CT--0.412100 | 0  | 4.188722  | 3.236303  | -2.960364 | L |
| C-CT--0.412100 | 0  | 4.935300  | 4.730794  | -4.737993 | L |
| H-H-0.271900   | 0  | 5.618465  | 7.684799  | -0.645922 | L |
| H-H1-0.092200  | 0  | 6.382211  | 6.535368  | -3.270226 | L |
| H-HC-0.045700  | 0  | 3.647457  | 5.874837  | -2.465562 | L |
| H-HC-0.045700  | 0  | 4.839194  | 5.322629  | -1.292211 | L |
| H-HC--0.036100 | 0  | 6.113157  | 4.153001  | -3.034676 | L |
| H-HC-0.100000  | 0  | 3.188504  | 3.425122  | -3.345219 | L |
| H-HC-0.100000  | 0  | 4.132373  | 3.052570  | -1.888708 | L |
| H-HC-0.100000  | 0  | 4.603096  | 2.354779  | -3.446378 | L |
| H-HC-0.100000  | 0  | 3.939039  | 5.122573  | -4.944825 | L |
| H-HC-0.100000  | 0  | 5.091228  | 3.820221  | -5.313358 | L |
| H-HC-0.100000  | 0  | 5.674161  | 5.465053  | -5.055498 | L |
| N-N--0.415700  | 0  | 4.071136  | 8.753229  | -2.741399 | L |
| C-CT--0.149000 | -1 | 3.369740  | 9.902907  | -3.243669 | L |
| H-H-0.271900   | 0  | 3.996662  | 8.540252  | -1.754775 | L |
| H-H1-0.097600  | 0  | 4.032968  | 10.496636 | -3.873934 | L |
| H-H1-0.097600  | 0  | 3.016599  | 10.513377 | -2.411302 | L |
| H-H1-0.097600  | 0  | 2.511601  | 9.578535  | -3.834887 | L |
| C-CT--0.366200 | -1 | -8.733226 | 2.366207  | 8.135220  | L |
| C-C-0.597200   | 0  | -7.864309 | 1.154083  | 7.954867  | L |
| O-O--0.567900  | 0  | -7.540542 | 0.474117  | 8.921703  | L |
| H-HC-0.112300  | 0  | -9.656836 | 2.224989  | 7.577288  | L |
| H-HC-0.112300  | 0  | -8.204824 | 3.240605  | 7.758469  | L |
| H-HC-0.112300  | 0  | -8.952623 | 2.492654  | 9.193352  | L |
| N-N--0.415700  | 0  | -7.479081 | 0.901193  | 6.712442  | L |
| C-CT--0.038900 | -1 | -6.672117 | -0.248540 | 6.298615  | L |
| C-C-0.597300   | 0  | -5.410907 | 0.248747  | 5.615416  | L |
| O-O--0.567900  | 0  | -5.462066 | 0.707218  | 4.474522  | L |
| C-CT-0.365400  | 0  | -7.474661 | -1.214809 | 5.414275  | L |
| O-OH--0.676100 | 0  | -8.025367 | -0.547799 | 4.304204  | L |
| C-CT--0.243800 | 0  | -8.625479 | -1.839949 | 6.208176  | L |
| H-H-0.271900   | 0  | -7.808757 | 1.523944  | 5.978766  | L |

|                |    |           |           |          |            |
|----------------|----|-----------|-----------|----------|------------|
| H-H1-0.100700  | 0  | -6.368266 | -0.811842 | 7.180679 | L          |
| H-H1-0.004300  | 0  | -6.813664 | -2.008191 | 5.063437 | L          |
| H-HC-0.064200  | 0  | -8.229657 | -2.373407 | 7.072056 | L          |
| H-HC-0.064200  | 0  | -9.175877 | -2.537964 | 5.583691 | L          |
| H-HC-0.064200  | 0  | -9.315387 | -1.066553 | 6.544140 | L          |
| H-HO-0.410200  | 0  | -7.335986 | 0.046461  | 3.974016 | L          |
| N-N--0.415700  | 0  | -4.312330 | 0.220640  | 6.373721 | L          |
| C-CT--0.059700 | -1 | -3.117306 | 1.043132  | 6.171224 | L          |
| C-C-0.597300   | 0  | -1.870865 | 0.164565  | 6.097659 | L          |
| O-O--0.567900  | 0  | -1.613129 | -0.638938 | 6.998402 | L          |
| C-CT-0.130300  | 0  | -3.000852 | 2.096831  | 7.298121 | L          |
| C-CT--0.043000 | 0  | -4.253566 | 2.994945  | 7.454639 | L          |
| C-CT--0.320400 | 0  | -1.753145 | 2.970732  | 7.095685 | L          |
| C-CT--0.066000 | 0  | -4.656244 | 3.810274  | 6.216403 | L          |
| H-H-0.271900   | 0  | -4.375552 | -0.239939 | 7.267131 | L          |
| H-H1-0.086900  | 0  | -3.218489 | 1.588936  | 5.240684 | L          |
| H-HC-0.018700  | 0  | -2.873733 | 1.565643  | 8.243383 | L          |
| H-HC-0.023600  | 0  | -4.079175 | 3.691206  | 8.275711 | L          |
| H-HC-0.023600  | 0  | -5.101262 | 2.375879  | 7.746886 | L          |
| H-HC-0.088200  | 0  | -1.733406 | 3.354730  | 6.075737 | L          |
| H-HC-0.088200  | 0  | -0.856512 | 2.371699  | 7.258247 | L          |
| H-HC-0.088200  | 0  | -1.747474 | 3.797926  | 7.804418 | L          |
| H-HC-0.018600  | 0  | -3.846709 | 4.473330  | 5.915629 | L          |
| H-HC-0.018600  | 0  | -5.533328 | 4.412927  | 6.452623 | L          |
| H-HC-0.018600  | 0  | -4.906511 | 3.148842  | 5.389839 | L          |
| N-N--0.516300  | 0  | -1.118569 | 0.343475  | 5.017849 | L          |
| C-CT-0.038100  | -1 | 0.179044  | -0.242665 | 4.736241 | L H-HC 178 |
| C-C-0.536600   | 0  | 1.119750  | -0.086147 | 5.937184 | L          |
| O-O--0.581900  | 0  | 1.335794  | 1.007588  | 6.454091 | L          |
| C-CT--0.520019 | 0  | 0.671226  | 0.402789  | 3.424718 | H          |
| C-C-0.636404   | 0  | 0.974345  | -0.559405 | 2.286797 | H          |
| O-O2--0.608036 | 0  | 0.382406  | -1.675173 | 2.206374 | H          |
| O-O2--0.608131 | 0  | 1.815068  | -0.109638 | 1.439314 | H          |
| H-H-0.293600   | 0  | -1.523227 | 0.934492  | 4.298530 | L          |
| H-H1-0.088000  | 0  | 0.022835  | -1.310770 | 4.577403 | L          |
| H-HC-0.132300  | 0  | 1.568841  | 0.992230  | 3.623903 | H          |
| H-HC-0.188993  | 0  | -0.079978 | 1.101555  | 3.040997 | H          |
| N-N--0.415700  | 0  | 1.660225  | -1.199681 | 6.399928 | L          |
| C-CT-0.033700  | -1 | 2.558597  | -1.255891 | 7.530332 | L          |
| C-C-0.597300   | 0  | 3.778260  | -2.076676 | 7.126958 | L          |
| O-O--0.567900  | 0  | 3.824651  | -3.302917 | 7.275213 | L          |
| C-CT--0.182500 | 0  | 1.799054  | -1.821410 | 8.738689 | L          |
| H-H-0.271900   | 0  | 1.351781  | -2.075376 | 5.992092 | L          |
| H-H1-0.082300  | 0  | 2.904432  | -0.252989 | 7.788291 | L          |
| H-HC-0.060300  | 0  | 0.959964  | -1.166909 | 8.977955 | L          |
| H-HC-0.060300  | 0  | 2.468289  | -1.879282 | 9.596838 | L          |
| H-HC-0.060300  | 0  | 1.421035  | -2.818567 | 8.507333 | L          |
| N-N--0.415700  | 0  | 4.750753  | -1.380558 | 6.550784 | L          |
| C-CT-0.018800  | -1 | 5.955310  | -1.962787 | 6.003363 | L H-HC 200 |
| C-C-0.597300   | 0  | 7.152230  | -1.817355 | 6.952192 | L          |
| O-O--0.567900  | 0  | 7.200931  | -0.965550 | 7.841918 | L          |
| C-CT--0.517456 | 0  | 6.210852  | -1.321510 | 4.636635 | H          |
| C-CM-0.287351  | 0  | 5.344951  | -1.796845 | 3.527704 | H          |
| N-N2--0.586994 | 0  | 5.489756  | -3.049779 | 2.947739 | H          |

|                |    |           |            |           |            |
|----------------|----|-----------|------------|-----------|------------|
| C-CM--0.020338 | 0  | 4.373901  | -1.183699  | 2.786040  | H          |
| C-CM-0.242458  | 0  | 4.631393  | -3.134333  | 1.896302  | H          |
| N-N2--0.505070 | 0  | 3.946267  | -2.013303  | 1.769400  | H          |
| H-H-0.271900   | 0  | 4.648451  | -0.370805  | 6.498479  | L          |
| H-H1-0.088100  | 0  | 5.808072  | -3.028588  | 5.859368  | L          |
| H-HC-0.166355  | 0  | 7.266735  | -1.485695  | 4.375498  | H          |
| H-HC-0.174481  | 0  | 6.095780  | -0.243354  | 4.774675  | H          |
| H-H-0.335795   | 0  | 6.132275  | -3.770094  | 3.270460  | H          |
| H-H4-0.152777  | 0  | 3.973049  | -0.188795  | 2.908497  | H          |
| H-H5-0.209475  | 0  | 4.534206  | -3.998733  | 1.254208  | H          |
| N-N--0.415700  | 0  | 8.154541  | -2.659318  | 6.707437  | L          |
| C-CT--0.149000 | -1 | 9.423933  | -2.590574  | 7.398186  | L          |
| H-H-0.271900   | 0  | 8.002050  | -3.338028  | 5.968080  | L          |
| H-H1-0.097600  | 0  | 10.095529 | -3.361634  | 7.019423  | L          |
| H-H1-0.097600  | 0  | 9.266044  | -2.737724  | 8.468032  | L          |
| H-H1-0.097600  | 0  | 9.873137  | -1.608348  | 7.240475  | L          |
| C-CT--0.366200 | -1 | 8.348021  | -9.389909  | 0.917282  | L          |
| C-C-0.597200   | 0  | 8.721629  | -9.146697  | -0.532429 | L          |
| O-O--0.567900  | 0  | 9.742894  | -8.520721  | -0.788920 | L          |
| H-HC-0.112300  | 0  | 8.284240  | -10.458505 | 1.108668  | L          |
| H-HC-0.112300  | 0  | 7.401288  | -8.899814  | 1.136895  | L          |
| H-HC-0.112300  | 0  | 9.120915  | -8.953740  | 1.550051  | L          |
| N-N--0.254800  | 0  | 7.910735  | -9.612948  | -1.498667 | L          |
| C-CT--0.026600 | -1 | 8.153883  | -9.370457  | -2.922929 | L          |
| C-C-0.589600   | 0  | 8.002085  | -7.897044  | -3.301644 | L          |
| O-O--0.574800  | 0  | 8.711093  | -7.398784  | -4.172900 | L          |
| C-CT--0.007000 | 0  | 7.151286  | -10.265191 | -3.659467 | L          |
| C-CT-0.018900  | 0  | 5.993360  | -10.403627 | -2.669884 | L          |
| C-CT-0.019200  | 0  | 6.687634  | -10.380783 | -1.307419 | L          |
| H-H1-0.064100  | 0  | 9.167600  | -9.677810  | -3.183061 | L          |
| H-HC-0.025300  | 0  | 7.600598  | -11.244917 | -3.828742 | L          |
| H-HC-0.025300  | 0  | 6.826553  | -9.830778  | -4.606260 | L          |
| H-HC-0.021300  | 0  | 5.437492  | -11.328970 | -2.823941 | L          |
| H-HC-0.021300  | 0  | 5.330052  | -9.541670  | -2.757417 | L          |
| H-H1-0.039100  | 0  | 6.036114  | -9.920513  | -0.563259 | L          |
| H-H1-0.039100  | 0  | 6.943499  | -11.397670 | -1.006760 | L          |
| N-N--0.516300  | 0  | 7.080924  | -7.201402  | -2.633918 | L          |
| C-CT-0.039700  | -1 | 6.833093  | -5.773341  | -2.803109 | L          |
| C-C-0.536600   | 0  | 8.094890  | -4.912555  | -2.668583 | L          |
| O-O--0.581900  | 0  | 8.271679  | -3.925522  | -3.386365 | L          |
| C-CT-0.056000  | 0  | 5.732121  | -5.332545  | -1.832806 | L H-HC 244 |
| C-CT--0.515956 | 0  | 5.212560  | -3.941899  | -2.209813 | H          |
| C-C-0.587828   | 0  | 4.117856  | -3.398919  | -1.299702 | H          |
| O-O2--0.600319 | 0  | 4.060888  | -2.117336  | -1.271043 | H          |
| O-O2--0.589127 | 0  | 3.358605  | -4.184982  | -0.687137 | H          |
| H-H-0.293600   | 0  | 6.549652  | -7.678658  | -1.924855 | L          |
| H-H1-0.110500  | 0  | 6.462278  | -5.617150  | -3.816504 | L          |
| H-HC--0.017300 | 0  | 6.121512  | -5.319176  | -0.813658 | L          |
| H-HC--0.017300 | 0  | 4.905140  | -6.042462  | -1.887417 | L          |
| H-HC-0.167759  | 0  | 4.815812  | -3.985645  | -3.231118 | H          |
| H-HC-0.135230  | 0  | 6.040494  | -3.224371  | -2.215100 | H          |
| N-N--0.415700  | 0  | 9.003801  | -5.322864  | -1.786476 | L          |
| C-CT--0.024900 | -1 | 10.241140 | -4.620422  | -1.467169 | L          |
| C-C-0.597300   | 0  | 11.262059 | -4.502633  | -2.591906 | L          |

|                |    |           |           |           |   |
|----------------|----|-----------|-----------|-----------|---|
| O-O--0.567900  | 0  | 12.237482 | -3.763614 | -2.457588 | L |
| C-CT-0.211700  | 0  | 10.883278 | -5.259309 | -0.229659 | L |
| O-OH--0.654600 | 0  | 9.928142  | -5.451830 | 0.803389  | L |
| H-H-0.271900   | 0  | 8.796229  | -6.136706 | -1.224051 | L |
| H-H1-0.084300  | 0  | 9.972255  | -3.598126 | -1.197010 | L |
| H-H1-0.035200  | 0  | 11.682551 | -4.611849 | 0.133936  | L |
| H-H1-0.035200  | 0  | 11.309726 | -6.226467 | -0.500079 | L |
| H-HO-0.427500  | 0  | 9.367533  | -4.647665 | 0.876606  | L |
| N-N--0.415700  | 0  | 11.026372 | -5.187358 | -3.709264 | L |
| C-CT-0.033700  | -1 | 11.777317 | -5.021147 | -4.946724 | L |
| C-C-0.597300   | 0  | 10.955200 | -4.440013 | -6.101032 | L |
| O-O--0.567900  | 0  | 11.399483 | -4.426652 | -7.248115 | L |
| C-CT--0.182500 | 0  | 12.382939 | -6.388110 | -5.297118 | L |
| H-H-0.271900   | 0  | 10.215257 | -5.795352 | -3.717666 | L |
| H-H1-0.082300  | 0  | 12.604272 | -4.328397 | -4.784847 | L |
| H-HC-0.060300  | 0  | 12.994563 | -6.745127 | -4.467786 | L |
| H-HC-0.060300  | 0  | 13.010086 | -6.296545 | -6.184602 | L |
| H-HC-0.060300  | 0  | 11.585654 | -7.106456 | -5.494772 | L |
| N-N--0.415700  | 0  | 9.770507  | -3.933484 | -5.777626 | L |
| C-CT--0.025200 | -1 | 8.866395  | -3.256136 | -6.683935 | L |
| C-C-0.597300   | 0  | 8.792618  | -1.754676 | -6.456362 | L |
| O-O--0.567900  | 0  | 8.785250  | -0.978016 | -7.408805 | L |
| H-H-0.271900   | 0  | 9.483118  | -4.007265 | -4.807935 | L |
| H-H1-0.069800  | 0  | 7.864424  | -3.663468 | -6.552655 | L |
| H-H1-0.069800  | 0  | 9.167478  | -3.428411 | -7.717758 | L |
| N-N--0.415700  | 0  | 8.738864  | -1.353251 | -5.189575 | L |
| C-CT--0.002400 | -1 | 8.585565  | 0.033060  | -4.767656 | L |
| C-C-0.597300   | 0  | 9.705397  | 0.460133  | -3.811863 | L |
| O-O--0.567900  | 0  | 10.326044 | -0.394908 | -3.172210 | L |
| C-CT--0.034300 | 0  | 7.203696  | 0.175399  | -4.103306 | L |
| C-CA-0.011800  | 0  | 6.041821  | -0.010893 | -5.061440 | L |
| C-CA--0.125600 | 0  | 5.773540  | 0.966477  | -6.038680 | L |
| C-CA--0.125600 | 0  | 5.240916  | -1.166283 | -4.995559 | L |
| C-CA--0.170400 | 0  | 4.716244  | 0.787612  | -6.948674 | L |
| C-CA--0.170400 | 0  | 4.182155  | -1.343860 | -5.903821 | L |
| C-CA--0.107200 | 0  | 3.923017  | -0.371160 | -6.884600 | L |
| H-H-0.271900   | 0  | 8.754561  | -2.062466 | -4.465858 | L |
| H-H1-0.097800  | 0  | 8.622792  | 0.683920  | -5.641089 | L |
| H-HC-0.029500  | 0  | 7.109995  | 1.161190  | -3.648836 | L |
| H-HC-0.029500  | 0  | 7.128979  | -0.553566 | -3.294584 | L |
| H-HA-0.133000  | 0  | 6.387393  | 1.852887  | -6.100292 | L |
| H-HA-0.133000  | 0  | 5.438386  | -1.921753 | -4.249697 | L |
| H-HA-0.143000  | 0  | 4.516590  | 1.538651  | -7.699686 | L |
| H-HA-0.143000  | 0  | 3.564105  | -2.227939 | -5.847107 | L |
| H-HA-0.129700  | 0  | 3.109226  | -0.512409 | -7.581804 | L |
| N-N--0.254800  | 0  | 9.963016  | 1.773374  | -3.662053 | L |
| C-CT--0.026600 | -1 | 10.823014 | 2.264403  | -2.591235 | L |
| C-C-0.589600   | 0  | 10.188515 | 2.005560  | -1.215852 | L |
| O-O--0.574800  | 0  | 8.995310  | 1.694302  | -1.139902 | L |
| C-CT--0.007000 | 0  | 10.980550 | 3.765939  | -2.865246 | L |
| C-CT-0.018900  | 0  | 9.666633  | 4.135712  | -3.551085 | L |
| C-CT-0.019200  | 0  | 9.364651  | 2.891571  | -4.386105 | L |
| H-H1-0.064100  | 0  | 11.793898 | 1.773034  | -2.647770 | L |
| H-HC-0.025300  | 0  | 11.808892 | 3.924562  | -3.557273 | L |

|                |    |           |           |           |            |
|----------------|----|-----------|-----------|-----------|------------|
| H-HC-0.025300  | 0  | 11.132358 | 4.345943  | -1.953608 | L          |
| H-HC-0.021300  | 0  | 9.766112  | 5.027835  | -4.170185 | L          |
| H-HC-0.021300  | 0  | 8.885686  | 4.275376  | -2.800949 | L          |
| H-H1-0.039100  | 0  | 8.287442  | 2.784428  | -4.504383 | L          |
| H-H1-0.039100  | 0  | 9.839662  | 2.981554  | -5.363864 | L          |
| N-N--0.254800  | 0  | 10.951960 | 2.118256  | -0.118535 | L          |
| C-CT--0.026600 | -1 | 10.395645 | 2.108479  | 1.227662  | L          |
| C-C-0.589600   | 0  | 9.340961  | 3.192667  | 1.452131  | L          |
| O-O--0.574800  | 0  | 9.594968  | 4.370466  | 1.210398  | L          |
| C-CT--0.007000 | 0  | 11.592569 | 2.299827  | 2.169845  | L          |
| C-CT-0.018900  | 0  | 12.783241 | 1.815038  | 1.346129  | L          |
| C-CT-0.019200  | 0  | 12.401283 | 2.226543  | -0.072838 | L          |
| H-H1-0.064100  | 0  | 9.956486  | 1.126592  | 1.410040  | L          |
| H-HC-0.025300  | 0  | 11.476039 | 1.722763  | 3.087748  | L          |
| H-HC-0.025300  | 0  | 11.730395 | 3.357225  | 2.403319  | L          |
| H-HC-0.021300  | 0  | 12.851783 | 0.727382  | 1.404272  | L          |
| H-HC-0.021300  | 0  | 13.716405 | 2.279427  | 1.665886  | L          |
| H-H1-0.039100  | 0  | 12.695267 | 3.261562  | -0.252417 | L          |
| H-H1-0.039100  | 0  | 12.881487 | 1.560512  | -0.790565 | L          |
| N-N--0.415700  | 0  | 8.175867  | 2.770273  | 1.932802  | L          |
| C-CT-0.018800  | -1 | 7.018773  | 3.598535  | 2.225297  | L H-HC 334 |
| C-C-0.597300   | 0  | 6.158894  | 3.009711  | 3.340393  | L          |
| O-O--0.567900  | 0  | 6.159449  | 1.797936  | 3.555882  | L          |
| C-CT--0.515368 | 0  | 6.194521  | 3.715294  | 0.915211  | H          |
| C-CM-0.287903  | 0  | 5.598949  | 2.436648  | 0.405979  | H          |
| N-N2--0.582625 | 0  | 6.247334  | 1.627654  | -0.513422 | H          |
| C-CM--0.036893 | 0  | 4.457847  | 1.733682  | 0.718440  | H          |
| C-CM-0.243454  | 0  | 5.508181  | 0.507998  | -0.716649 | H          |
| N-N2--0.523998 | 0  | 4.419339  | 0.536867  | 0.029414  | H          |
| H-H-0.271900   | 0  | 8.044315  | 1.773913  | 2.032611  | L          |
| H-H1-0.088100  | 0  | 7.353253  | 4.593953  | 2.532926  | L          |
| H-HC-0.162301  | 0  | 6.847306  | 4.170147  | 0.155786  | H          |
| H-HC-0.188340  | 0  | 5.399121  | 4.448326  | 1.097331  | H          |
| H-H-0.339448   | 0  | 7.160998  | 1.826806  | -0.920690 | H          |
| H-H4-0.185957  | 0  | 3.664079  | 2.010089  | 1.397523  | H          |
| H-H5-0.211295  | 0  | 5.792139  | -0.296935 | -1.379254 | H          |
| N-N--0.415700  | 0  | 5.399664  | 3.876292  | 3.999503  | L          |
| C-CT-0.014300  | -1 | 4.550702  | 3.579352  | 5.144060  | L          |
| C-C-0.597300   | 0  | 5.198939  | 2.627727  | 6.160955  | L          |
| O-O--0.567900  | 0  | 4.674608  | 1.574390  | 6.526342  | L          |
| C-CT--0.204100 | 0  | 3.106989  | 3.293956  | 4.705371  | L          |
| C-C-0.713000   | 0  | 2.158879  | 4.178298  | 5.493320  | L          |
| N-N--0.919100  | 0  | 1.578334  | 3.704105  | 6.560949  | L          |
| O-O--0.593100  | 0  | 1.960790  | 5.342066  | 5.189934  | L          |
| H-H-0.271900   | 0  | 5.548067  | 4.865039  | 3.788534  | L          |
| H-H1-0.104800  | 0  | 4.509115  | 4.531033  | 5.678840  | L          |
| H-HC-0.079700  | 0  | 2.872950  | 2.245748  | 4.858911  | L          |
| H-HC-0.079700  | 0  | 2.974925  | 3.528836  | 3.649549  | L          |
| H-H-0.419600   | 0  | 0.911253  | 4.283713  | 7.022802  | L          |
| H-H-0.419600   | 0  | 1.636837  | 2.696910  | 6.713019  | L          |
| N-N--0.415700  | 0  | 6.384663  | 3.057818  | 6.605150  | L          |
| C-CT--0.149000 | -1 | 7.291416  | 2.309675  | 7.454178  | L          |
| H-H-0.271900   | 0  | 6.698396  | 3.932362  | 6.207687  | L          |
| H-H1-0.097600  | 0  | 8.044268  | 2.971988  | 7.881203  | L          |

|                |    |           |           |           |            |
|----------------|----|-----------|-----------|-----------|------------|
| H-H1-0.097600  | 0  | 7.780977  | 1.529915  | 6.867611  | L          |
| H-H1-0.097600  | 0  | 6.733046  | 1.825903  | 8.258815  | L          |
| C-CT--0.366200 | -1 | -2.264034 | -2.756532 | 9.539986  | L          |
| C-C-0.597200   | 0  | -2.387926 | -3.844802 | 8.509148  | L          |
| O-O--0.567900  | 0  | -2.930125 | -4.907873 | 8.798463  | L          |
| H-HC-0.112300  | 0  | -1.210110 | -2.541089 | 9.704895  | L          |
| H-HC-0.112300  | 0  | -2.723749 | -3.090624 | 10.467740 | L          |
| H-HC-0.112300  | 0  | -2.768758 | -1.862824 | 9.177949  | L          |
| N-N--0.347900  | 0  | -1.858745 | -3.581962 | 7.317539  | L          |
| C-CT--0.240000 | -1 | -1.755715 | -4.546997 | 6.216649  | L          |
| C-C-0.734100   | 0  | -0.348556 | -4.576498 | 5.632612  | L          |
| O-O--0.589400  | 0  | 0.463290  | -3.689865 | 5.881019  | L          |
| C-CT--0.009400 | 0  | -2.853213 | -4.261764 | 5.172120  | L          |
| C-CT-0.018700  | 0  | -2.637075 | -2.972224 | 4.370545  | L H-HC 379 |
| C-CT--0.464524 | 0  | -3.740202 | -2.793128 | 3.321187  | H          |
| C-CT--0.195159 | 0  | -3.628173 | -1.492503 | 2.535891  | H          |
| N-N3--0.748751 | 0  | -2.423604 | -1.427401 | 1.646761  | H          |
| H-H-0.274700   | 0  | -1.464574 | -2.653392 | 7.182081  | L          |
| H-H1-0.142600  | 0  | -1.938558 | -5.543798 | 6.618774  | L          |
| H-HC-0.036200  | 0  | -3.817734 | -4.207524 | 5.679977  | L          |
| H-HC-0.036200  | 0  | -2.903423 | -5.090041 | 4.472544  | L          |
| H-HC-0.010300  | 0  | -1.669130 | -3.005433 | 3.870115  | L          |
| H-HC-0.010300  | 0  | -2.663128 | -2.125632 | 5.049353  | L          |
| H-HC-0.173903  | 0  | -4.705728 | -2.792961 | 3.835541  | H          |
| H-HC-0.148535  | 0  | -3.733328 | -3.657301 | 2.641635  | H          |
| H-HP-0.236066  | 0  | -3.592137 | -0.605571 | 3.168785  | H          |
| H-HP-0.172509  | 0  | -4.490427 | -1.389575 | 1.864751  | H          |
| H-H-0.437293   | 0  | -2.264986 | -0.388616 | 1.284630  | H          |
| H-H-0.366736   | 0  | -2.572974 | -2.037669 | 0.836493  | H          |
| H-H-0.419451   | 0  | -1.527139 | -1.684672 | 2.098440  | H          |
| N-N--0.415700  | 0  | -0.048683 | -5.613125 | 4.863007  | L          |
| C-CT--0.025200 | -1 | 1.266711  | -5.812424 | 4.263671  | L          |
| C-C-0.597300   | 0  | 1.146336  | -6.527334 | 2.916774  | L          |
| O-O--0.567900  | 0  | 1.738513  | -7.578731 | 2.683172  | L          |
| H-H-0.271900   | 0  | -0.788747 | -6.272628 | 4.641827  | L          |
| H-H1-0.069800  | 0  | 1.885451  | -6.415289 | 4.928491  | L          |
| H-H1-0.069800  | 0  | 1.760402  | -4.854343 | 4.097449  | L          |
| N-N--0.415700  | 0  | 0.329400  | -5.941962 | 2.045999  | L          |
| C-CT--0.025200 | -1 | -0.240201 | -6.534469 | 0.839152  | L          |
| C-C-0.597300   | 0  | -1.373020 | -5.641454 | 0.398335  | L          |
| O-O--0.567900  | 0  | -2.257271 | -5.371195 | 1.203187  | L          |
| H-H-0.271900   | 0  | -0.118242 | -5.099242 | 2.381219  | L          |
| H-H1-0.069800  | 0  | -0.629644 | -7.527558 | 1.063182  | L          |
| H-H1-0.069800  | 0  | 0.524269  | -6.599077 | 0.064402  | L          |
| N-N--0.415700  | 0  | -1.325520 | -5.176880 | -0.849217 | L          |
| C-CT--0.001400 | -1 | -2.161189 | -4.094222 | -1.369964 | L          |
| C-C-0.597300   | 0  | -3.626652 | -4.167191 | -0.928852 | L          |
| O-O--0.567900  | 0  | -4.191300 | -3.194423 | -0.439374 | L          |
| C-CT--0.015200 | 0  | -2.063098 | -4.069085 | -2.909197 | L          |
| C-CA--0.001100 | 0  | -0.671496 | -4.240598 | -3.493728 | L          |
| C-CA--0.190600 | 0  | 0.342057  | -3.309334 | -3.199724 | L          |
| C-CA--0.190600 | 0  | -0.395606 | -5.330197 | -4.344203 | L          |
| C-CA--0.234100 | 0  | 1.629667  | -3.467994 | -3.745674 | L          |
| C-CA--0.234100 | 0  | 0.890223  | -5.492301 | -4.894492 | L          |

|                |    |           |            |           |   |
|----------------|----|-----------|------------|-----------|---|
| C-C-0.322600   | 0  | 1.907026  | -4.559597  | -4.593726 | L |
| O-OH--0.557900 | 0  | 3.143522  | -4.714455  | -5.136793 | L |
| H-H-0.271900   | 0  | -0.504278 | -5.393497  | -1.395871 | L |
| H-H1-0.087600  | 0  | -1.756597 | -3.154212  | -0.993555 | L |
| H-HC-0.029500  | 0  | -2.459136 | -3.122539  | -3.270064 | L |
| H-HC-0.029500  | 0  | -2.703975 | -4.852559  | -3.314450 | L |
| H-HA-0.169900  | 0  | 0.137914  | -2.463569  | -2.555101 | L |
| H-HA-0.169900  | 0  | -1.178236 | -6.032521  | -4.591938 | L |
| H-HA-0.165600  | 0  | 2.405295  | -2.753109  | -3.513054 | L |
| H-HA-0.165600  | 0  | 1.093741  | -6.320564  | -5.553389 | L |
| H-HO-0.399200  | 0  | 3.165776  | -5.456340  | -5.739109 | L |
| N-N--0.415700  | 0  | -4.225132 | -5.349644  | -1.087538 | L |
| C-CT--0.024900 | -1 | -5.564137 | -5.635121  | -0.593945 | L |
| C-C-0.597300   | 0  | -5.695132 | -5.558294  | 0.925125  | L |
| O-O--0.567900  | 0  | -5.060750 | -6.317851  | 1.666440  | L |
| C-CT-0.211700  | 0  | -6.027909 | -7.028617  | -1.022381 | L |
| O-OH--0.654600 | -1 | -7.286275 | -7.334012  | -0.436971 | L |
| H-H-0.271900   | 0  | -3.647966 | -6.093372  | -1.436749 | L |
| H-H1-0.084300  | 0  | -6.248033 | -4.910104  | -1.035749 | L |
| H-H1-0.035200  | 0  | -5.296074 | -7.767405  | -0.693595 | L |
| H-H1-0.035200  | 0  | -6.104768 | -7.067338  | -2.108981 | L |
| H-HO-0.427500  | -1 | -7.544342 | -8.205651  | -0.746717 | L |
| N-N--0.415700  | 0  | -6.667305 | -4.757121  | 1.353442  | L |
| C-CT-0.033700  | -1 | -7.164338 | -4.665232  | 2.714551  | L |
| C-C-0.597300   | 0  | -7.517636 | -5.994058  | 3.387642  | L |
| O-O--0.567900  | 0  | -7.446532 | -6.102647  | 4.609926  | L |
| C-CT--0.182500 | 0  | -8.357750 | -3.709534  | 2.716951  | L |
| H-H-0.271900   | 0  | -7.125775 | -4.175344  | 0.658813  | L |
| H-H1-0.082300  | 0  | -6.379508 | -4.216178  | 3.321888  | L |
| H-HC-0.060300  | 0  | -8.068899 | -2.741709  | 2.302942  | L |
| H-HC-0.060300  | 0  | -8.705545 | -3.571516  | 3.736060  | L |
| H-HC-0.060300  | 0  | -9.169267 | -4.132582  | 2.130553  | L |
| N-N--0.415700  | 0  | -7.911441 | -6.997374  | 2.602639  | L |
| C-CT--0.025200 | -1 | -8.293671 | -8.310419  | 3.107616  | L |
| C-C-0.597300   | 0  | -7.334557 | -9.438097  | 2.748652  | L |
| O-O--0.567900  | 0  | -7.749790 | -10.592560 | 2.674599  | L |
| H-H-0.271900   | 0  | -7.897889 | -6.828080  | 1.603285  | L |
| H-H1-0.069800  | 0  | -9.271050 | -8.564814  | 2.698719  | L |
| H-H1-0.069800  | 0  | -8.390185 | -8.291506  | 4.193431  | L |
| N-N--0.415700  | 0  | -6.051521 | -9.127253  | 2.569775  | L |
| C-CT--0.024900 | -1 | -4.978526 | -10.121310 | 2.584762  | L |
| C-C-0.597300   | 0  | -4.280221 | -10.087709 | 3.938303  | L |
| O-O--0.567900  | 0  | -3.958738 | -9.013568  | 4.455970  | L |
| C-CT-0.211700  | 0  | -3.984417 | -9.827740  | 1.456493  | L |
| O-OH--0.654600 | -1 | -3.099181 | -10.920715 | 1.267176  | L |
| H-H-0.271900   | 0  | -5.797869 | -8.146060  | 2.638413  | L |
| H-H1-0.084300  | 0  | -5.390912 | -11.116366 | 2.417232  | L |
| H-H1-0.035200  | 0  | -3.419570 | -8.922145  | 1.684282  | L |
| H-H1-0.035200  | 0  | -4.540487 | -9.668633  | 0.531786  | L |
| H-HO-0.427500  | -1 | -2.557598 | -10.731141 | 0.497501  | L |
| N-N--0.415700  | 0  | -4.082933 | -11.266398 | 4.527878  | L |
| C-CT--0.149000 | -1 | -3.546904 | -11.416165 | 5.869639  | L |
| H-H-0.271900   | 0  | -4.363054 | -12.084415 | 4.010510  | L |
| H-H1-0.097600  | 0  | -3.342179 | -12.465637 | 6.081377  | L |

|                |    |            |            |           |            |
|----------------|----|------------|------------|-----------|------------|
| H-H1-0.097600  | 0  | -4.262829  | -11.033533 | 6.600416  | L          |
| H-H1-0.097600  | 0  | -2.620661  | -10.844615 | 5.966489  | L          |
| C-CT--0.366200 | -1 | -12.135325 | 5.102405   | -0.642983 | L          |
| C-C-0.597200   | 0  | -10.706347 | 5.279910   | -0.202022 | L          |
| O-O--0.567900  | 0  | -10.389465 | 5.000057   | 0.948573  | L          |
| H-HC-0.112300  | 0  | -12.528559 | 6.058225   | -0.982265 | L          |
| H-HC-0.112300  | 0  | -12.721574 | 4.743824   | 0.201550  | L          |
| H-HC-0.112300  | 0  | -12.170905 | 4.368687   | -1.446185 | L          |
| N-N--0.415700  | 0  | -9.856398  | 5.733079   | -1.119159 | L          |
| C-CT--0.025200 | -1 | -8.422577  | 5.890340   | -0.889834 | L          |
| C-C-0.597300   | 0  | -7.606890  | 5.781563   | -2.154190 | L          |
| O-O--0.567900  | 0  | -8.108147  | 6.096446   | -3.239706 | L          |
| H-H-0.271900   | 0  | -10.170979 | 5.906043   | -2.061609 | L          |
| H-H1-0.069800  | 0  | -8.112590  | 5.097470   | -0.219355 | L          |
| H-H1-0.069800  | 0  | -8.219046  | 6.851823   | -0.420535 | L          |
| N-N--0.415700  | 0  | -6.353973  | 5.354944   | -1.981876 | L H-H1 489 |
| C-CT--0.530209 | -1 | -5.336261  | 5.317391   | -3.032731 | H          |
| C-C-0.568093   | 0  | -4.558109  | 4.017169   | -2.929278 | H          |
| O-O--0.528105  | 0  | -4.436960  | 3.427293   | -1.844106 | H          |
| C-CT-0.298500  | 0  | -4.415968  | 6.559244   | -2.961243 | L H-H1 489 |
| C-CT--0.319200 | 0  | -5.186886  | 7.833394   | -3.311587 | L          |
| C-CT--0.319200 | 0  | -3.751976  | 6.733529   | -1.592266 | L          |
| H-H-0.271900   | 0  | -6.069316  | 5.062378   | -1.048669 | L          |
| H-H1-0.184096  | 0  | -5.854799  | 5.363994   | -3.996689 | H          |
| H-HC--0.029700 | 0  | -3.628255  | 6.446814   | -3.705171 | L          |
| H-HC-0.079100  | 0  | -5.930540  | 8.044216   | -2.544758 | L          |
| H-HC-0.079100  | 0  | -5.685784  | 7.705351   | -4.271168 | L          |
| H-HC-0.079100  | 0  | -4.492667  | 8.670251   | -3.376691 | L          |
| H-HC-0.079100  | 0  | -4.502116  | 6.866044   | -0.814082 | L          |
| H-HC-0.079100  | 0  | -3.098315  | 7.603778   | -1.607587 | L          |
| H-HC-0.079100  | 0  | -3.155455  | 5.853168   | -1.353101 | L          |
| N-N--0.610103  | 0  | -3.965998  | 3.569375   | -4.055570 | H          |
| C-CT--0.314060 | -1 | -4.223068  | 4.030014   | -5.411270 | H          |
| C-C-0.597300   | 0  | -5.345967  | 3.217593   | -6.039578 | L H-H1 505 |
| O-O--0.567900  | 0  | -5.479723  | 2.015880   | -5.809818 | L          |
| C-CT--0.110200 | 0  | -2.931776  | 3.897698   | -6.254635 | L H-H1 505 |
| C-CT-0.353100  | 0  | -1.837375  | 4.951571   | -5.961734 | L          |
| C-CT--0.412100 | 0  | -1.067557  | 4.727118   | -4.656738 | L          |
| C-CT--0.412100 | 0  | -0.807651  | 4.940822   | -7.095350 | L          |
| H-H-0.398207   | 0  | -3.491124  | 2.669464   | -3.975770 | H          |
| H-H1-0.165130  | 0  | -4.509895  | 5.080137   | -5.410760 | H          |
| H-HC-0.045700  | 0  | -3.216255  | 4.003619   | -7.301853 | L          |
| H-HC-0.045700  | 0  | -2.514159  | 2.898308   | -6.133068 | L          |
| H-HC--0.036100 | 0  | -2.295103  | 5.941021   | -5.936626 | L          |
| H-HC-0.100000  | 0  | -0.666607  | 3.715639   | -4.629654 | L          |
| H-HC-0.100000  | 0  | -1.733737  | 4.866320   | -3.807262 | L          |
| H-HC-0.100000  | 0  | -0.256916  | 5.449293   | -4.571094 | L          |
| H-HC-0.100000  | 0  | -0.318119  | 3.969079   | -7.140611 | L          |
| H-HC-0.100000  | 0  | -0.058721  | 5.712541   | -6.917464 | L          |
| H-HC-0.100000  | 0  | -1.300098  | 5.145112   | -8.044721 | L          |
| N-N--0.415700  | 0  | -6.127655  | 3.866541   | -6.897500 | L          |
| C-CT--0.038900 | -1 | -7.313015  | 3.269964   | -7.525206 | L          |
| C-C-0.597300   | 0  | -7.061544  | 1.932933   | -8.210897 | L          |
| O-O--0.567900  | 0  | -7.930468  | 1.064128   | -8.229863 | L          |



|                |    |            |           |            |            |
|----------------|----|------------|-----------|------------|------------|
| C-CT-0.365400  | -1 | -7.948238  | 4.198002  | -8.585019  | L          |
| O-OH--0.676100 | -1 | -7.885596  | 5.553889  | -8.133248  | L          |
| C-CT--0.243800 | 0  | -9.425329  | 3.904813  | -8.845919  | L          |
| H-H-0.271900   | 0  | -6.000268  | 4.863190  | -6.994694  | L          |
| H-H1-0.100700  | 0  | -8.056075  | 3.127040  | -6.747398  | L          |
| H-H1-0.004300  | 0  | -7.391911  | 4.123625  | -9.520385  | L          |
| H-HC-0.064200  | 0  | -9.538106  | 2.898952  | -9.250422  | L          |
| H-HC-0.064200  | 0  | -9.818967  | 4.615413  | -9.572568  | L          |
| H-HC-0.064200  | 0  | -9.991531  | 3.978712  | -7.916642  | L          |
| H-HO-0.410200  | -1 | -8.783480  | 5.889934  | -8.097765  | L          |
| N-N--0.415700  | 0  | -5.891701  | 1.805753  | -8.834263  | L          |
| C-CT--0.025200 | -1 | -5.506514  | 0.644633  | -9.624197  | L          |
| C-C-0.597300   | 0  | -4.602590  | -0.352296 | -8.931987  | L          |
| O-O--0.567900  | 0  | -4.112944  | -1.259809 | -9.604239  | L          |
| H-H-0.271900   | 0  | -5.215067  | 2.536769  | -8.677115  | L          |
| H-H1-0.069800  | 0  | -4.985156  | 0.987888  | -10.516656 | L          |
| H-H1-0.069800  | 0  | -6.395500  | 0.105140  | -9.951205  | L          |
| N-N--0.415700  | 0  | -4.374259  | -0.167082 | -7.626591  | L H-H1 545 |
| C-CT--0.539097 | -1 | -3.467914  | -0.976346 | -6.822449  | H          |
| C-C-0.572106   | 0  | -4.225496  | -1.434822 | -5.573939  | H          |
| O-O--0.533001  | 0  | -4.945849  | -2.427582 | -5.662942  | H          |
| C-CT-0.130300  | 0  | -2.080756  | -0.306634 | -6.664327  | L H-H1 545 |
| C-CT--0.043000 | 0  | -1.441505  | 0.060148  | -8.024756  | L          |
| C-CT--0.320400 | 0  | -1.183750  | -1.297231 | -5.900753  | L          |
| C-CT--0.066000 | 0  | -0.078679  | 0.757587  | -7.920373  | L          |
| H-H-0.271900   | 0  | -4.841629  | 0.601762  | -7.155586  | L          |
| H-H1-0.180646  | 0  | -3.300164  | -1.904623 | -7.380851  | H          |
| H-HC-0.018700  | 0  | -2.194441  | 0.608548  | -6.095116  | L          |
| H-HC-0.023600  | 0  | -2.101711  | 0.748756  | -8.550408  | L          |
| H-HC-0.023600  | 0  | -1.335161  | -0.840009 | -8.631514  | L          |
| H-HC-0.088200  | 0  | -1.094506  | -2.229041 | -6.458063  | L          |
| H-HC-0.088200  | 0  | -1.604789  | -1.511581 | -4.920531  | L          |
| H-HC-0.088200  | 0  | -0.192915  | -0.883148 | -5.737837  | L          |
| H-HC-0.018600  | 0  | -0.148490  | 1.604411  | -7.238850  | L          |
| H-HC-0.018600  | 0  | 0.217485   | 1.117397  | -8.905790  | L          |
| H-HC-0.018600  | 0  | 0.680688   | 0.062617  | -7.564757  | L          |
| N-N--0.611145  | 0  | -4.104894  | -0.678685 | -4.457880  | H          |
| C-CT--0.109296 | -1 | -4.635986  | -1.086830 | -3.162138  | H          |
| C-C-0.597300   | 0  | -6.163447  | -1.076660 | -3.127624  | L H-H1 564 |
| O-O--0.567900  | 0  | -6.797122  | -1.983003 | -2.577185  | L          |
| C-CT--0.388038 | 0  | -4.017625  | -0.239412 | -2.061219  | H          |
| H-H-0.369964   | 0  | -3.437780  | 0.089511  | -4.425087  | H          |
| H-H1-0.178541  | 0  | -4.380538  | -2.134656 | -2.977470  | H          |
| H-H1-0.157964  | 0  | -4.460929  | -0.539854 | -1.105587  | H          |
| H-H1-0.179833  | 0  | -4.219735  | 0.826617  | -2.190732  | H          |
| H-HS-0.319500  | 0  | -1.680292  | 1.913874  | -0.504017  | H          |
| N-N--0.415700  | 0  | -6.753488  | -0.097554 | -3.803789  | L          |
| C-CT--0.087500 | -1 | -8.190818  | -0.040614 | -4.058805  | L          |
| C-C-0.597300   | 0  | -8.665721  | -1.195897 | -4.925368  | L          |
| O-O--0.567900  | 0  | -9.591274  | -1.909209 | -4.540721  | L          |
| C-CT-0.298500  | 0  | -8.592905  | 1.320534  | -4.644670  | L          |
| C-CT--0.319200 | 0  | -10.107887 | 1.437809  | -4.859443  | L          |
| C-CT--0.319200 | 0  | -8.166419  | 2.492574  | -3.746197  | L          |
| H-H-0.271900   | 0  | -6.115429  | 0.554854  | -4.251744  | L          |

|                |    |            |           |           |   |
|----------------|----|------------|-----------|-----------|---|
| H-H1-0.096900  | 0  | -8.699929  | -0.142635 | -3.102429 | L |
| H-HC--0.029700 | 0  | -8.102269  | 1.416731  | -5.604243 | L |
| H-HC-0.079100  | 0  | -10.629635 | 1.279401  | -3.915272 | L |
| H-HC-0.079100  | 0  | -10.442771 | 0.697380  | -5.585781 | L |
| H-HC-0.079100  | 0  | -10.349398 | 2.427905  | -5.245083 | L |
| H-HC-0.079100  | 0  | -8.633035  | 2.411885  | -2.765967 | L |
| H-HC-0.079100  | 0  | -8.449512  | 3.440540  | -4.202994 | L |
| H-HC-0.079100  | 0  | -7.083820  | 2.501617  | -3.614908 | L |
| N-N--0.415700  | 0  | -8.042321  | -1.392304 | -6.085608 | L |
| C-CT--0.025200 | -1 | -8.400477  | -2.449336 | -7.028239 | L |
| C-C-0.597300   | 0  | -8.317206  | -3.852134 | -6.439185 | L |
| O-O--0.567900  | 0  | -9.220759  | -4.662599 | -6.631052 | L |
| H-H-0.271900   | 0  | -7.263843  | -0.784054 | -6.303676 | L |
| H-H1-0.069800  | 0  | -7.730604  | -2.400006 | -7.886432 | L |
| H-H1-0.069800  | 0  | -9.419699  | -2.284740 | -7.377412 | L |
| N-N--0.415700  | 0  | -7.233941  | -4.132651 | -5.717464 | L |
| C-CT--0.025200 | -1 | -7.011625  | -5.398857 | -5.030774 | L |
| C-C-0.597300   | 0  | -7.936367  | -5.658351 | -3.852494 | L |
| O-O--0.567900  | 0  | -8.258654  | -6.811301 | -3.572290 | L |
| H-H-0.271900   | 0  | -6.515053  | -3.413938 | -5.655360 | L |
| H-H1-0.069800  | 0  | -5.985852  | -5.421865 | -4.664659 | L |
| H-H1-0.069800  | 0  | -7.137971  | -6.214514 | -5.742949 | L |
| N-N--0.415700  | 0  | -8.331772  | -4.600370 | -3.147377 | L |
| C-CT--0.038900 | -1 | -9.384056  | -4.666340 | -2.130597 | L |
| C-C-0.597300   | 0  | -10.752900 | -4.959112 | -2.736203 | L |
| O-O--0.567900  | 0  | -11.496666 | -5.795546 | -2.224034 | L |
| C-CT-0.365400  | 0  | -9.428893  | -3.370682 | -1.306293 | L |
| O-OH--0.676100 | 0  | -8.196703  | -3.204792 | -0.643152 | L |
| C-CT--0.243800 | 0  | -10.519224 | -3.391610 | -0.235353 | L |
| H-H-0.271900   | 0  | -7.961422  | -3.692792 | -3.404854 | L |
| H-H1-0.100700  | 0  | -9.156184  | -5.485171 | -1.448171 | L |
| H-H1-0.004300  | 0  | -9.595162  | -2.515239 | -1.961050 | L |
| H-HC-0.064200  | 0  | -11.498246 | -3.284454 | -0.701170 | L |
| H-HC-0.064200  | 0  | -10.369297 | -2.565662 | 0.459410  | L |
| H-HC-0.064200  | 0  | -10.485612 | -4.334693 | 0.308481  | L |
| H-HO-0.410200  | 0  | -7.608612  | -2.729633 | -1.266024 | L |
| N-N--0.415700  | 0  | -11.100910 | -4.249084 | -3.810421 | L |
| C-CT--0.149000 | -1 | -12.333899 | -4.434519 | -4.547012 | L |
| H-H-0.271900   | 0  | -10.431893 | -3.567465 | -4.157021 | L |
| H-H1-0.097600  | 0  | -12.404081 | -3.684579 | -5.335808 | L |
| H-H1-0.097600  | 0  | -13.186020 | -4.340779 | -3.872397 | L |
| H-H1-0.097600  | 0  | -12.339063 | -5.429058 | -4.996330 | L |
| N-N2--0.511415 | 0  | 1.988191   | -0.030976 | -1.720870 | H |
| C-CA-0.057801  | 0  | 0.684063   | 0.261095  | -1.698788 | H |
| C-CA-0.063496  | 0  | 0.000998   | 0.762631  | -2.811162 | H |
| C-CA--0.109122 | 0  | 0.726858   | 1.034053  | -3.967987 | H |
| C-CA--0.164490 | 0  | 2.090180   | 0.755942  | -3.984704 | H |
| C-CA-0.098392  | 0  | 2.674155   | 0.200564  | -2.851703 | H |
| C-C-0.541263   | 0  | -1.498906  | 0.933814  | -2.825333 | H |
| O-O--0.574884  | 0  | -2.070546  | 1.397477  | -3.834102 | H |
| N-N--0.751108  | 0  | -1.649515  | 2.351432  | -1.447048 | H |
| H-H4-0.220889  | 0  | 0.170786   | 0.094459  | -0.757426 | H |
| H-HA-0.160434  | 0  | 0.207151   | 1.437019  | -4.830009 | H |
| H-HA-0.142191  | 0  | 2.696683   | 0.958676  | -4.861342 | H |

|                |   |           |           |           |   |
|----------------|---|-----------|-----------|-----------|---|
| H-H4-0.174502  | 0 | 3.722675  | -0.073733 | -2.836224 | H |
| H-H-0.412468   | 0 | -2.561832 | 2.788335  | -1.622681 | H |
| H-H-0.353801   | 0 | -0.921576 | 3.069750  | -1.483772 | H |
| Zn-ZN-0.974537 | 0 | 2.856860  | -1.091762 | 0.001961  | H |
| O-OW--0.834000 | 0 | -2.141489 | -7.242324 | 3.473537  | L |
| H-HW-0.417000  | 0 | -2.596197 | -6.653663 | 2.851599  | L |
| H-HW-0.417000  | 0 | -2.853798 | -7.801950 | 3.824887  | L |
| O-OW--0.783903 | 0 | 1.316131  | -2.551677 | -0.133583 | H |
| H-HW-0.401253  | 0 | 0.942039  | -2.452246 | 0.780389  | H |
| H-HW-0.424111  | 0 | 1.924468  | -3.332697 | -0.189362 | H |
| O-OW--0.834000 | 0 | -3.643386 | -8.445441 | 7.199944  | L |
| H-HW-0.417000  | 0 | -3.733976 | -7.505443 | 7.375872  | L |
| H-HW-0.417000  | 0 | -3.781519 | -8.520625 | 6.243785  | L |
| O-OW--0.834000 | 0 | 7.213358  | -0.018694 | 1.839231  | L |
| H-HW-0.417000  | 0 | 6.900943  | 0.358450  | 2.680766  | L |
| H-HW-0.417000  | 0 | 6.435266  | 0.108725  | 1.274434  | L |
| O-OW--0.834000 | 0 | 7.045764  | -4.957322 | 4.761231  | L |
| H-HW-0.417000  | 0 | 6.096622  | -5.026262 | 4.991302  | L |
| H-HW-0.417000  | 0 | 7.265258  | -5.841744 | 4.465294  | L |
| O-OW--0.834000 | 0 | 8.575994  | -0.947966 | -0.280530 | L |
| H-HW-0.417000  | 0 | 8.161573  | -0.567468 | 0.519692  | L |
| H-HW-0.417000  | 0 | 8.832964  | -0.160604 | -0.781242 | L |
| O-OW--0.834000 | 0 | 12.614032 | -1.069243 | -1.904681 | L |
| H-HW-0.417000  | 0 | 11.771508 | -0.822622 | -2.323263 | L |
| H-HW-0.417000  | 0 | 12.637963 | -2.029322 | -2.037923 | L |
| O-OW--0.834000 | 0 | 8.260911  | -3.313119 | 0.981844  | L |
| H-HW-0.417000  | 0 | 8.449716  | -2.550852 | 0.396178  | L |
| H-HW-0.417000  | 0 | 7.555769  | -2.969344 | 1.539856  | L |
| O-OW--0.834000 | 0 | 4.355655  | -4.922237 | 5.165233  | L |
| H-HW-0.417000  | 0 | 4.086668  | -4.542897 | 6.024739  | L |
| H-HW-0.417000  | 0 | 4.043274  | -4.257447 | 4.541306  | L |
| S-SH--0.326142 | 0 | -2.214693 | -0.529911 | -1.926341 | H |

## IC2

|                |    |            |          |           |   |
|----------------|----|------------|----------|-----------|---|
| C-CT--0.366200 | -1 | -10.305405 | 3.925576 | 4.025304  | L |
| C-C-0.597200   | 0  | -8.964995  | 3.289585 | 3.787734  | L |
| O-O--0.567900  | 0  | -8.386032  | 2.723173 | 4.708026  | L |
| H-HC-0.112300  | 0  | -11.039761 | 3.456079 | 3.373649  | L |
| H-HC-0.112300  | 0  | -10.238509 | 4.988521 | 3.800312  | L |
| H-HC-0.112300  | 0  | -10.588377 | 3.782881 | 5.065896  | L |
| N-N--0.415700  | 0  | -8.496667  | 3.386599 | 2.550334  | L |
| C-CT--0.059700 | -1 | -7.336796  | 2.659152 | 2.027200  | L |
| C-C-0.597300   | 0  | -6.175434  | 3.628168 | 1.833112  | L |
| O-O--0.567900  | 0  | -6.283009  | 4.583229 | 1.067865  | L |
| C-CT-0.130300  | 0  | -7.717904  | 1.928897 | 0.713063  | L |
| C-CT--0.043000 | 0  | -8.898851  | 0.949547 | 0.933902  | L |
| C-CT--0.320400 | 0  | -6.510752  | 1.163253 | 0.147634  | L |
| C-CT--0.066000 | 0  | -9.465093  | 0.346360 | -0.357190 | L |
| H-H-0.271900   | 0  | -9.042633  | 3.940027 | 1.898250  | L |
| H-H1-0.086900  | 0  | -7.029690  | 1.901328 | 2.747543  | L |
| H-HC-0.018700  | 0  | -8.022392  | 2.677081 | -0.021041 | L |
| H-HC-0.023600  | 0  | -9.723418  | 1.471832 | 1.417447  | L |
| H-HC-0.023600  | 0  | -8.582803  | 0.140408 | 1.593489  | L |
| H-HC-0.088200  | 0  | -6.175932  | 0.397653 | 0.848074  | L |

|                |    |            |           |           |           |
|----------------|----|------------|-----------|-----------|-----------|
| H-HC-0.088200  | 0  | -5.682748  | 1.846082  | -0.043650 | L         |
| H-HC-0.088200  | 0  | -6.757766  | 0.699928  | -0.805063 | L         |
| H-HC-0.018600  | 0  | -9.708220  | 1.139441  | -1.063601 | L         |
| H-HC-0.018600  | 0  | -10.374802 | -0.206615 | -0.125741 | L         |
| H-HC-0.018600  | 0  | -8.746192  | -0.339797 | -0.802234 | L         |
| N-N--0.516300  | 0  | -5.090623  | 3.388148  | 2.565489  | L         |
| C-CT-0.038100  | -1 | -3.768263  | 3.984020  | 2.402454  | L H-HC 30 |
| C-C-0.536600   | 0  | -3.683552  | 5.501566  | 2.150717  | L         |
| O-O--0.581900  | 0  | -2.710804  | 6.010880  | 1.592005  | L         |
| C-CT--0.547145 | 0  | -3.068583  | 3.169141  | 1.315437  | H         |
| C-C-0.532653   | 0  | -2.891838  | 1.729682  | 1.719943  | H         |
| O-O2--0.588507 | 0  | -2.392087  | 1.405385  | 2.790091  | H         |
| O-O2--0.625559 | 0  | -3.334091  | 0.886357  | 0.806354  | H         |
| H-H-0.293600   | 0  | -5.109892  | 2.538302  | 3.114850  | L         |
| H-H1-0.088000  | 0  | -3.219949  | 3.816581  | 3.330566  | L         |
| H-HC-0.128435  | 0  | -2.067315  | 3.595788  | 1.180088  | H         |
| H-HC-0.183556  | 0  | -3.613072  | 3.274425  | 0.375575  | H         |
| N-N--0.415700  | 0  | -4.650266  | 6.258149  | 2.653587  | L         |
| C-CT--0.025200 | -1 | -4.636754  | 7.703790  | 2.540111  | L         |
| C-C-0.597300   | 0  | -3.740821  | 8.337247  | 3.589077  | L         |
| O-O--0.567900  | 0  | -4.217607  | 8.983212  | 4.522436  | L         |
| H-H-0.271900   | 0  | -5.457589  | 5.761393  | 2.996598  | L         |
| H-H1-0.069800  | 0  | -5.649240  | 8.081710  | 2.675228  | L         |
| H-H1-0.069800  | 0  | -4.290397  | 7.999224  | 1.548612  | L         |
| N-N--0.415700  | 0  | -2.437205  | 8.133603  | 3.435077  | L         |
| C-CT--0.038900 | -1 | -1.415407  | 8.551122  | 4.389768  | L         |
| C-C-0.597300   | 0  | -0.505368  | 9.637627  | 3.807617  | L         |
| O-O--0.567900  | 0  | -0.597786  | 10.009881 | 2.636376  | L         |
| C-CT-0.365400  | 0  | -0.554524  | 7.375641  | 4.889899  | L         |
| O-OH--0.676100 | 0  | 0.478341   | 7.109156  | 3.977497  | L         |
| C-CT--0.243800 | 0  | -1.326833  | 6.086692  | 5.154043  | L         |
| H-H-0.271900   | 0  | -2.164571  | 7.552793  | 2.645485  | L         |
| H-H1-0.100700  | 0  | -1.909198  | 8.977882  | 5.261182  | L         |
| H-H1-0.004300  | 0  | -0.090460  | 7.681223  | 5.828252  | L         |
| H-HC-0.064200  | 0  | -2.181561  | 6.293460  | 5.796971  | L         |
| H-HC-0.064200  | 0  | -0.670909  | 5.373714  | 5.647337  | L         |
| H-HC-0.064200  | 0  | -1.668869  | 5.652084  | 4.215024  | L         |
| H-HO-0.410200  | 0  | 1.029658   | 6.388866  | 4.352215  | L         |
| N-N--0.415700  | 0  | 0.414755   | 10.138836 | 4.635976  | L         |
| C-CT--0.025200 | -1 | 1.458054   | 11.072769 | 4.220183  | L         |
| C-C-0.597300   | 0  | 2.329352   | 10.585337 | 3.070051  | L         |
| O-O--0.567900  | 0  | 2.596993   | 11.338827 | 2.139335  | L         |
| H-H-0.271900   | 0  | 0.457454   | 9.759681  | 5.566800  | L         |
| H-H1-0.069800  | 0  | 2.111407   | 11.285719 | 5.065316  | L         |
| H-H1-0.069800  | 0  | 0.990416   | 12.006803 | 3.907715  | L         |
| N-N--0.516300  | 0  | 2.766073   | 9.331588  | 3.147910  | L         |
| C-CT-0.038100  | -1 | 3.662733   | 8.720305  | 2.168695  | L         |
| C-C-0.536600   | 0  | 3.025207   | 8.399238  | 0.828794  | L         |
| O-O--0.581900  | 0  | 3.748876   | 8.045328  | -0.096313 | L         |
| C-CT--0.030300 | 0  | 4.234860   | 7.407937  | 2.736001  | L         |
| C-C-0.799400   | -1 | 5.588757   | 7.598372  | 3.395612  | L         |
| O-O2--0.801400 | -1 | 6.171526   | 8.701642  | 3.319343  | L         |
| O-O2--0.801400 | -1 | 6.045442   | 6.641405  | 4.053543  | L         |
| H-H-0.293600   | 0  | 2.460678   | 8.750343  | 3.912732  | L         |

|                |    |           |           |           |   |
|----------------|----|-----------|-----------|-----------|---|
| H-H1-0.088000  | 0  | 4.469234  | 9.418303  | 1.940955  | L |
| H-HC--0.012200 | 0  | 4.372675  | 6.672837  | 1.941323  | L |
| H-HC--0.012200 | 0  | 3.533330  | 6.974679  | 3.451698  | L |
| N-N--0.415700  | 0  | 1.706845  | 8.514912  | 0.707111  | L |
| C-CT--0.002400 | -1 | 0.996739  | 8.326351  | -0.550800 | L |
| C-C-0.597300   | 0  | 0.395744  | 9.620434  | -1.097219 | L |
| O-O--0.567900  | 0  | 0.333404  | 9.808303  | -2.312243 | L |
| C-CT--0.034300 | 0  | -0.068445 | 7.236527  | -0.388834 | L |
| C-CA-0.011800  | 0  | 0.476616  | 5.854120  | -0.072125 | L |
| C-CA--0.125600 | 0  | 1.145540  | 5.108784  | -1.061906 | L |
| C-CA--0.125600 | 0  | 0.267136  | 5.284628  | 1.196642  | L |
| C-CA--0.170400 | 0  | 1.564795  | 3.793862  | -0.785686 | L |
| C-CA--0.170400 | 0  | 0.686337  | 3.973339  | 1.473018  | L |
| C-CA--0.107200 | 0  | 1.323050  | 3.223799  | 0.473549  | L |
| H-H-0.271900   | 0  | 1.190105  | 8.755900  | 1.540905  | L |
| H-H1-0.097800  | 0  | 1.691093  | 7.977917  | -1.315053 | L |
| H-HC-0.029500  | 0  | -0.628563 | 7.164233  | -1.321584 | L |
| H-HC-0.029500  | 0  | -0.770522 | 7.540378  | 0.389236  | L |
| H-HA-0.133000  | 0  | 1.309036  | 5.534784  | -2.040917 | L |
| H-HA-0.133000  | 0  | -0.255448 | 5.842826  | 1.955437  | L |
| H-HA-0.143000  | 0  | 2.030594  | 3.186596  | -1.544394 | L |
| H-HA-0.143000  | 0  | 0.484110  | 3.532476  | 2.439473  | L |
| H-HA-0.129700  | 0  | 1.605106  | 2.199756  | 0.661704  | L |
| N-N--0.415700  | 0  | -0.024852 | 10.527452 | -0.214056 | L |
| C-CT--0.149000 | -1 | -0.444194 | 11.863567 | -0.581974 | L |
| H-H-0.271900   | 0  | 0.016378  | 10.285248 | 0.770604  | L |
| H-H1-0.097600  | 0  | -0.800732 | 12.390670 | 0.303636  | L |
| H-H1-0.097600  | 0  | -1.245675 | 11.806889 | -1.320421 | L |
| H-H1-0.097600  | 0  | 0.400677  | 12.404965 | -1.010388 | L |
| C-CT--0.366200 | -1 | 8.006299  | 8.424913  | -0.104439 | L |
| C-C-0.597200   | 0  | 7.537529  | 7.655042  | -1.314409 | L |
| O-O--0.567900  | 0  | 8.351857  | 7.352835  | -2.183021 | L |
| H-HC-0.112300  | 0  | 7.531406  | 9.403460  | -0.089710 | L |
| H-HC-0.112300  | 0  | 9.087521  | 8.535861  | -0.146014 | L |
| H-HC-0.112300  | 0  | 7.736811  | 7.877103  | 0.799375  | L |
| N-N--0.415700  | 0  | 6.230161  | 7.384896  | -1.399059 | L |
| C-CT--0.051800 | -1 | 5.585716  | 6.863776  | -2.614128 | L |
| C-C-0.597300   | 0  | 4.851732  | 7.933562  | -3.419227 | L |
| O-O--0.567900  | 0  | 4.990283  | 8.022084  | -4.638815 | L |
| C-CT--0.110200 | 0  | 4.754342  | 5.592456  | -2.352728 | L |
| C-CT-0.353100  | 0  | 5.172240  | 4.438719  | -3.291582 | L |
| C-CT--0.412100 | 0  | 4.326510  | 3.200196  | -3.031962 | L |
| C-CT--0.412100 | 0  | 5.005308  | 4.752840  | -4.783026 | L |
| H-H-0.271900   | 0  | 5.630609  | 7.658353  | -0.628016 | L |
| H-H1-0.092200  | 0  | 6.400987  | 6.563206  | -3.271289 | L |
| H-HC-0.045700  | 0  | 3.695508  | 5.812718  | -2.487907 | L |
| H-HC-0.045700  | 0  | 4.899430  | 5.267614  | -1.321854 | L |
| H-HC--0.036100 | 0  | 6.215454  | 4.184710  | -3.099742 | L |
| H-HC-0.100000  | 0  | 3.304292  | 3.377532  | -3.362728 | L |
| H-HC-0.100000  | 0  | 4.327402  | 2.969350  | -1.968838 | L |
| H-HC-0.100000  | 0  | 4.741596  | 2.352277  | -3.573493 | L |
| H-HC-0.100000  | 0  | 3.995202  | 5.114800  | -4.976110 | L |
| H-HC-0.100000  | 0  | 5.188814  | 3.859992  | -5.377898 | L |
| H-HC-0.100000  | 0  | 5.717749  | 5.516667  | -5.090816 | L |

|                |    |           |           |           |           |
|----------------|----|-----------|-----------|-----------|-----------|
| N-N--0.415700  | 0  | 4.093523  | 8.761897  | -2.716212 | L         |
| C-CT--0.149000 | -1 | 3.385937  | 9.901161  | -3.233593 | L         |
| H-H-0.271900   | 0  | 4.040989  | 8.568357  | -1.723842 | L         |
| H-H1-0.097600  | 0  | 4.046713  | 10.491939 | -3.869280 | L         |
| H-H1-0.097600  | 0  | 3.026114  | 10.518708 | -2.409286 | L         |
| H-H1-0.097600  | 0  | 2.530823  | 9.564706  | -3.822631 | L         |
| C-CT--0.366200 | -1 | -8.729794 | 2.361698  | 8.129869  | L         |
| C-C-0.597200   | 0  | -7.857060 | 1.151705  | 7.952033  | L         |
| O-O--0.567900  | 0  | -7.535047 | 0.470592  | 8.918536  | L         |
| H-HC-0.112300  | 0  | -9.651123 | 2.218384  | 7.568648  | L         |
| H-HC-0.112300  | 0  | -8.202511 | 3.237728  | 7.755365  | L         |
| H-HC-0.112300  | 0  | -8.953284 | 2.486979  | 9.187278  | L         |
| N-N--0.415700  | 0  | -7.467976 | 0.901385  | 6.710613  | L         |
| C-CT--0.038900 | -1 | -6.670159 | -0.252699 | 6.291111  | L         |
| C-C-0.597300   | 0  | -5.404544 | 0.246305  | 5.617400  | L         |
| O-O--0.567900  | 0  | -5.444387 | 0.712841  | 4.478772  | L         |
| C-CT-0.365400  | 0  | -7.485066 | -1.199511 | 5.396438  | L         |
| O-OH--0.676100 | 0  | -8.021538 | -0.517887 | 4.288356  | L         |
| C-CT--0.243800 | 0  | -8.650036 | -1.812147 | 6.179468  | L         |
| H-H-0.271900   | 0  | -7.798750 | 1.525478  | 5.978461  | L         |
| H-H1-0.100700  | 0  | -6.373911 | -0.826565 | 7.168994  | L         |
| H-H1-0.004300  | 0  | -6.838148 | -2.001771 | 5.043567  | L         |
| H-HC-0.064200  | 0  | -8.267336 | -2.360869 | 7.039682  | L         |
| H-HC-0.064200  | 0  | -9.209813 | -2.493928 | 5.545223  | L         |
| H-HC-0.064200  | 0  | -9.328571 | -1.030690 | 6.519816  | L         |
| H-HO-0.410200  | 0  | -7.324701 | 0.069441  | 3.962013  | L         |
| N-N--0.415700  | 0  | -4.309909 | 0.218244  | 6.380319  | L         |
| C-CT--0.059700 | -1 | -3.114093 | 1.035846  | 6.167118  | L         |
| C-C-0.597300   | 0  | -1.867272 | 0.156801  | 6.097994  | L         |
| O-O--0.567900  | 0  | -1.612670 | -0.644959 | 7.000993  | L         |
| C-CT-0.130300  | 0  | -2.993649 | 2.110642  | 7.273510  | L         |
| C-CT--0.043000 | 0  | -4.245081 | 3.011061  | 7.423522  | L         |
| C-CT--0.320400 | 0  | -1.746647 | 2.979601  | 7.049980  | L         |
| C-CT--0.066000 | 0  | -4.648342 | 3.813988  | 6.178045  | L         |
| H-H-0.271900   | 0  | -4.372312 | -0.241792 | 7.274334  | L         |
| H-H1-0.086900  | 0  | -3.205775 | 1.550871  | 5.209751  | L         |
| H-HC-0.018700  | 0  | -2.861423 | 1.595597  | 8.226962  | L         |
| H-HC-0.023600  | 0  | -4.068266 | 3.715577  | 8.237016  | L         |
| H-HC-0.023600  | 0  | -5.092869 | 2.395783  | 7.723516  | L         |
| H-HC-0.088200  | 0  | -1.728986 | 3.342308  | 6.022155  | L         |
| H-HC-0.088200  | 0  | -0.850126 | 2.383164  | 7.222218  | L         |
| H-HC-0.088200  | 0  | -1.738482 | 3.820929  | 7.741845  | L         |
| H-HC-0.018600  | 0  | -3.840126 | 4.475992  | 5.871420  | L         |
| H-HC-0.018600  | 0  | -5.527174 | 4.416677  | 6.407641  | L         |
| H-HC-0.018600  | 0  | -4.895841 | 3.143408  | 5.358716  | L         |
| N-N--0.516300  | 0  | -1.112883 | 0.336491  | 5.018113  | L         |
| C-CT-0.038100  | -1 | 0.181804  | -0.251190 | 4.732301  | L H-HC 17 |
| C-C-0.536600   | 0  | 1.122205  | -0.095370 | 5.933824  | L         |
| O-O--0.581900  | 0  | 1.334264  | 0.996784  | 6.456650  | L         |
| C-CT--0.520019 | 0  | 0.687281  | 0.381790  | 3.420098  | H         |
| C-C-0.636404   | 0  | 0.993096  | -0.593316 | 2.289679  | H         |
| O-O2--0.608036 | 0  | 0.429358  | -1.713282 | 2.220538  | H         |
| O-O2--0.608131 | 0  | 1.824486  | -0.122561 | 1.429331  | H         |
| H-H-0.293600   | 0  | -1.500709 | 0.922263  | 4.285254  | L         |

|                |    |           |            |           |           |
|----------------|----|-----------|------------|-----------|-----------|
| H-H1-0.088000  | 0  | 0.019417  | -1.318831  | 4.575548  | L         |
| H-HC-0.132300  | 0  | 1.591696  | 0.961383   | 3.622577  | H         |
| H-HC-0.188993  | 0  | -0.054746 | 1.088828   | 3.035066  | H         |
| N-N--0.415700  | 0  | 1.667096  | -1.208340  | 6.391232  | L         |
| C-CT-0.033700  | -1 | 2.558990  | -1.270080  | 7.526303  | L         |
| C-C-0.597300   | 0  | 3.779068  | -2.091060  | 7.124719  | L         |
| O-O--0.567900  | 0  | 3.825655  | -3.317139  | 7.274905  | L         |
| C-CT--0.182500 | 0  | 1.791988  | -1.840389  | 8.727684  | L         |
| H-H-0.271900   | 0  | 1.360918  | -2.079689  | 5.972260  | L         |
| H-H1-0.082300  | 0  | 2.904667  | -0.268602  | 7.789881  | L         |
| H-HC-0.060300  | 0  | 0.953524  | -1.184860  | 8.966317  | L         |
| H-HC-0.060300  | 0  | 2.456720  | -1.905020  | 9.588835  | L         |
| H-HC-0.060300  | 0  | 1.412208  | -2.835053  | 8.488488  | L         |
| N-N--0.415700  | 0  | 4.751567  | -1.395434  | 6.547829  | L         |
| C-CT-0.018800  | -1 | 5.955868  | -1.978255  | 6.000310  | L H-HC 20 |
| C-C-0.597300   | 0  | 7.152861  | -1.833900  | 6.949239  | L         |
| O-O--0.567900  | 0  | 7.203361  | -0.980890  | 7.837731  | L         |
| C-CT--0.517456 | 0  | 6.212120  | -1.338698  | 4.633954  | H         |
| C-CM-0.287351  | 0  | 5.352524  | -1.824529  | 3.525520  | H         |
| N-N2--0.586994 | 0  | 5.511966  | -3.075436  | 2.944465  | H         |
| C-CM--0.020338 | 0  | 4.373087  | -1.222625  | 2.786869  | H         |
| C-CM-0.242458  | 0  | 4.651878  | -3.170426  | 1.895465  | H         |
| N-N2--0.505070 | 0  | 3.954632  | -2.056911  | 1.771001  | H         |
| H-H-0.271900   | 0  | 4.648523  | -0.385854  | 6.494144  | L         |
| H-H1-0.088100  | 0  | 5.807868  | -3.044015  | 5.856704  | L         |
| H-HC-0.166355  | 0  | 7.270081  | -1.495766  | 4.376682  | H         |
| H-HC-0.174481  | 0  | 6.088091  | -0.261176  | 4.768461  | H         |
| H-H-0.335795   | 0  | 6.156987  | -3.791599  | 3.271557  | H         |
| H-H4-0.152777  | 0  | 3.956820  | -0.234479  | 2.911193  | H         |
| H-H5-0.209475  | 0  | 4.562144  | -4.035384  | 1.253148  | H         |
| N-N--0.415700  | 0  | 8.153422  | -2.678347  | 6.705867  | L         |
| C-CT--0.149000 | -1 | 9.423159  | -2.610936  | 7.396024  | L         |
| H-H-0.271900   | 0  | 7.999259  | -3.358332  | 5.967960  | L         |
| H-H1-0.097600  | 0  | 10.092956 | -3.384127  | 7.018428  | L         |
| H-H1-0.097600  | 0  | 9.265318  | -2.755778  | 8.466187  | L         |
| H-H1-0.097600  | 0  | 9.874326  | -1.629949  | 7.236276  | L         |
| C-CT--0.366200 | -1 | 8.344289  | -9.401325  | 0.906241  | L         |
| C-C-0.597200   | 0  | 8.719937  | -9.158546  | -0.543044 | L         |
| O-O--0.567900  | 0  | 9.744026  | -8.536667  | -0.798329 | L         |
| H-HC-0.112300  | 0  | 8.276653  | -10.469799 | 1.096960  | L         |
| H-HC-0.112300  | 0  | 7.399032  | -8.908121  | 1.125304  | L         |
| H-HC-0.112300  | 0  | 9.118077  | -8.968098  | 1.539923  | L         |
| N-N--0.254800  | 0  | 7.907914  | -9.620914  | -1.510209 | L         |
| C-CT--0.026600 | -1 | 8.152135  | -9.376988  | -2.934042 | L         |
| C-C-0.589600   | 0  | 8.003545  | -7.902648  | -3.310405 | L         |
| O-O--0.574800  | 0  | 8.715495  | -7.403652  | -4.178911 | L         |
| C-CT--0.007000 | 0  | 7.147657  | -10.268373 | -3.672089 | L         |
| C-CT-0.018900  | 0  | 5.988822  | -10.405042 | -2.683299 | L         |
| C-CT-0.019200  | 0  | 6.682265  | -10.385075 | -1.320349 | L         |
| H-H1-0.064100  | 0  | 9.165242  | -9.686194  | -3.194342 | L         |
| H-HC-0.025300  | 0  | 7.594592  | -11.249036 | -3.842222 | L         |
| H-HC-0.025300  | 0  | 6.824523  | -9.832085  | -4.618567 | L         |
| H-HC-0.021300  | 0  | 5.430914  | -11.328956 | -2.838554 | L         |
| H-HC-0.021300  | 0  | 5.327498  | -9.541523  | -2.770450 | L         |

|                |    |           |            |           |           |
|----------------|----|-----------|------------|-----------|-----------|
| H-H1-0.039100  | 0  | 6.031630  | -9.923226  | -0.576385 | L         |
| H-H1-0.039100  | 0  | 6.934749  | -11.402917 | -1.020078 | L         |
| N-N--0.516300  | 0  | 7.081694  | -7.207222  | -2.643499 | L         |
| C-CT-0.039700  | -1 | 6.834602  | -5.778804  | -2.810486 | L         |
| C-C-0.536600   | 0  | 8.096628  | -4.918628  | -2.673756 | L         |
| O-O--0.581900  | 0  | 8.274746  | -3.930607  | -3.389883 | L         |
| C-CT-0.056000  | 0  | 5.732896  | -5.339792  | -1.840203 | L H-HC 24 |
| C-CT--0.515956 | 0  | 5.213839  | -3.947294  | -2.211821 | H         |
| C-C-0.587828   | 0  | 4.115278  | -3.409807  | -1.301277 | H         |
| O-O2--0.600319 | 0  | 4.048970  | -2.128062  | -1.277144 | H         |
| O-O2--0.589127 | 0  | 3.363403  | -4.199417  | -0.685631 | H         |
| H-H-0.293600   | 0  | 6.547673  | -7.685544  | -1.937196 | L         |
| H-H1-0.110500  | 0  | 6.464383  | -5.620647  | -3.823792 | L         |
| H-HC--0.017300 | 0  | 6.120950  | -5.330648  | -0.820485 | L         |
| H-HC--0.017300 | 0  | 4.905541  | -6.048989  | -1.898417 | L         |
| H-HC-0.167759  | 0  | 4.821812  | -3.985324  | -3.235350 | H         |
| H-HC-0.135230  | 0  | 6.042041  | -3.229775  | -2.210821 | H         |
| N-N--0.415700  | 0  | 9.004767  | -5.330925  | -1.791832 | L         |
| C-CT--0.024900 | -1 | 10.243026 | -4.630670  | -1.471394 | L         |
| C-C-0.597300   | 0  | 11.263984 | -4.511535  | -2.595912 | L         |
| O-O--0.567900  | 0  | 12.239493 | -3.772761  | -2.460625 | L         |
| C-CT-0.211700  | 0  | 10.884992 | -5.273580  | -0.235850 | L         |
| O-OH--0.654600 | 0  | 9.930195  | -5.468685  | 0.796980  | L         |
| H-H-0.271900   | 0  | 8.795887  | -6.145233  | -1.230590 | L         |
| H-H1-0.084300  | 0  | 9.975440  | -3.608752  | -1.198543 | L         |
| H-H1-0.035200  | 0  | 11.684828 | -4.627758  | 0.129404  | L         |
| H-H1-0.035200  | 0  | 11.310711 | -6.240227  | -0.509245 | L         |
| H-HO-0.427500  | 0  | 9.370982  | -4.663872  | 0.873957  | L         |
| N-N--0.415700  | 0  | 11.028727 | -5.195408  | -3.713858 | L         |
| C-CT-0.033700  | -1 | 11.780613 | -5.028549  | -4.950654 | L         |
| C-C-0.597300   | 0  | 10.960595 | -4.442872  | -6.104086 | L         |
| O-O--0.567900  | 0  | 11.406647 | -4.425942  | -7.250463 | L         |
| C-CT--0.182500 | 0  | 12.382597 | -6.396409  | -5.303783 | L         |
| H-H-0.271900   | 0  | 10.217628 | -5.803484  | -3.723088 | L         |
| H-H1-0.082300  | 0  | 12.609406 | -4.338430  | -4.786981 | L         |
| H-HC-0.060300  | 0  | 12.992982 | -6.756867  | -4.475027 | L         |
| H-HC-0.060300  | 0  | 13.010231 | -6.304693  | -6.190903 | L         |
| H-HC-0.060300  | 0  | 11.583400 | -7.112159  | -5.503148 | L         |
| N-N--0.415700  | 0  | 9.775612  | -3.936913  | -5.780868 | L         |
| C-CT--0.025200 | -1 | 8.872209  | -3.258723  | -6.687184 | L         |
| C-C-0.597300   | 0  | 8.797276  | -1.757560  | -6.457764 | L         |
| O-O--0.567900  | 0  | 8.791616  | -0.979357  | -7.409068 | L         |
| H-H-0.271900   | 0  | 9.486793  | -4.013135  | -4.811760 | L         |
| H-H1-0.069800  | 0  | 7.870338  | -3.666814  | -6.557447 | L         |
| H-H1-0.069800  | 0  | 9.174404  | -3.429516  | -7.720925 | L         |
| N-N--0.415700  | 0  | 8.741292  | -1.357895  | -5.190597 | L         |
| C-CT--0.002400 | -1 | 8.593434  | 0.028379   | -4.767018 | L         |
| C-C-0.597300   | 0  | 9.716663  | 0.452893   | -3.813751 | L         |
| O-O--0.567900  | 0  | 10.340460 | -0.403643  | -3.179384 | L         |
| C-CT--0.034300 | 0  | 7.214714  | 0.173703   | -4.096697 | L         |
| C-CA-0.011800  | 0  | 6.045248  | 0.010450   | -5.049977 | L         |
| C-CA--0.125600 | 0  | 5.814114  | 0.974799   | -6.049713 | L         |
| C-CA--0.125600 | 0  | 5.192842  | -1.105102  | -4.950229 | L         |
| C-CA--0.170400 | 0  | 4.743062  | 0.822399   | -6.948172 | L         |



|                |    |           |           |           |           |
|----------------|----|-----------|-----------|-----------|-----------|
| C-CA--0.170400 | 0  | 4.121472  | -1.256759 | -5.848349 | L         |
| C-CA--0.107200 | 0  | 3.898967  | -0.297180 | -6.850606 | L         |
| H-H-0.271900   | 0  | 8.754550  | -2.068435 | -4.468045 | L         |
| H-H1-0.097800  | 0  | 8.630389  | 0.680104  | -5.639676 | L         |
| H-HC-0.029500  | 0  | 7.131220  | 1.154456  | -3.629722 | L         |
| H-HC-0.029500  | 0  | 7.137896  | -0.563982 | -3.296153 | L         |
| H-HA-0.133000  | 0  | 6.465228  | 1.831970  | -6.136339 | L         |
| H-HA-0.133000  | 0  | 5.356870  | -1.848991 | -4.184589 | L         |
| H-HA-0.143000  | 0  | 4.571962  | 1.563130  | -7.716200 | L         |
| H-HA-0.143000  | 0  | 3.464030  | -2.109864 | -5.765845 | L         |
| H-HA-0.129700  | 0  | 3.075133  | -0.419083 | -7.539380 | L         |
| N-N--0.254800  | 0  | 9.972679  | 1.766104  | -3.659390 | L         |
| C-CT--0.026600 | -1 | 10.831828 | 2.254987  | -2.586722 | L         |
| C-C-0.589600   | 0  | 10.198240 | 1.992036  | -1.212129 | L         |
| O-O--0.574800  | 0  | 9.005774  | 1.679141  | -1.137782 | L         |
| C-CT--0.007000 | 0  | 10.988644 | 3.757308  | -2.856680 | L         |
| C-CT-0.018900  | 0  | 9.674518  | 4.128060  | -3.541423 | L         |
| C-CT-0.019200  | 0  | 9.373311  | 2.886082  | -4.379986 | L         |
| H-H1-0.064100  | 0  | 11.803172 | 1.764579  | -2.644218 | L         |
| H-HC-0.025300  | 0  | 11.816868 | 3.918208  | -3.548323 | L         |
| H-HC-0.025300  | 0  | 11.140162 | 4.334967  | -1.943504 | L         |
| H-HC-0.021300  | 0  | 9.773302  | 5.022030  | -4.157960 | L         |
| H-HC-0.021300  | 0  | 8.893767  | 4.265063  | -2.790657 | L         |
| H-H1-0.039100  | 0  | 8.296187  | 2.778636  | -4.498618 | L         |
| H-H1-0.039100  | 0  | 9.848176  | 2.979274  | -5.357513 | L         |
| N-N--0.254800  | 0  | 10.960458 | 2.103952  | -0.113917 | L         |
| C-CT--0.026600 | -1 | 10.402361 | 2.094778  | 1.231765  | L         |
| C-C-0.589600   | 0  | 9.348216  | 3.179945  | 1.453993  | L         |
| O-O--0.574800  | 0  | 9.599924  | 4.356338  | 1.202767  | L         |
| C-CT--0.007000 | 0  | 11.598219 | 2.286687  | 2.175112  | L         |
| C-CT-0.018900  | 0  | 12.790050 | 1.802127  | 1.352835  | L         |
| C-CT-0.019200  | 0  | 12.409600 | 2.212926  | -0.066761 | L         |
| H-H1-0.064100  | 0  | 9.962573  | 1.113205  | 1.414264  | L         |
| H-HC-0.025300  | 0  | 11.480885 | 1.709833  | 3.093048  | L         |
| H-HC-0.025300  | 0  | 11.735233 | 3.344241  | 2.408407  | L         |
| H-HC-0.021300  | 0  | 12.858997 | 0.714523  | 1.411470  | L         |
| H-HC-0.021300  | 0  | 13.722655 | 2.267015  | 1.673502  | L         |
| H-H1-0.039100  | 0  | 12.703337 | 3.248003  | -0.246381 | L         |
| H-H1-0.039100  | 0  | 12.890666 | 1.546836  | -0.783889 | L         |
| N-N--0.415700  | 0  | 8.185677  | 2.759610  | 1.942184  | L         |
| C-CT-0.018800  | -1 | 7.026393  | 3.586745  | 2.229532  | L H-HC 33 |
| C-C-0.597300   | 0  | 6.168996  | 2.998920  | 3.346906  | L         |
| O-O--0.567900  | 0  | 6.175003  | 1.787960  | 3.566554  | L         |
| C-CT--0.515368 | 0  | 6.205244  | 3.692041  | 0.917816  | H         |
| C-CM-0.287903  | 0  | 5.622970  | 2.405068  | 0.415811  | H         |
| N-N2--0.582625 | 0  | 6.267852  | 1.604328  | -0.512989 | H         |
| C-CM--0.036893 | 0  | 4.495906  | 1.688302  | 0.744668  | H         |
| C-CM-0.243454  | 0  | 5.538155  | 0.475771  | -0.705544 | H         |
| N-N2--0.523998 | 0  | 4.459056  | 0.492901  | 0.054640  | H         |
| H-H-0.271900   | 0  | 8.055852  | 1.763674  | 2.048832  | L         |
| H-H1-0.088100  | 0  | 7.357367  | 4.584773  | 2.532391  | L         |
| H-HC-0.162301  | 0  | 6.856342  | 4.148496  | 0.157955  | H         |
| H-HC-0.188340  | 0  | 5.402928  | 4.418993  | 1.094837  | H         |
| H-H-0.339448   | 0  | 7.177073  | 1.810163  | -0.926583 | H         |

|                |    |           |           |           |           |
|----------------|----|-----------|-----------|-----------|-----------|
| H-H4-0.185957  | 0  | 3.715403  | 1.952498  | 1.442934  | H         |
| H-H5-0.211295  | 0  | 5.821744  | -0.325419 | -1.372940 | H         |
| N-N--0.415700  | 0  | 5.406567  | 3.864322  | 4.003460  | L         |
| C-CT-0.014300  | -1 | 4.556776  | 3.566245  | 5.146978  | L         |
| C-C-0.597300   | 0  | 5.202903  | 2.613421  | 6.164194  | L         |
| O-O--0.567900  | 0  | 4.676877  | 1.560672  | 6.528710  | L         |
| C-CT--0.204100 | 0  | 3.112831  | 3.283123  | 4.706889  | L         |
| C-C-0.713000   | 0  | 2.165633  | 4.165898  | 5.497540  | L         |
| N-N--0.919100  | 0  | 1.593233  | 3.691526  | 6.569460  | L         |
| O-O--0.593100  | 0  | 1.962332  | 5.328860  | 5.193927  | L         |
| H-H-0.271900   | 0  | 5.552174  | 4.853100  | 3.791203  | L         |
| H-H1-0.104800  | 0  | 4.515532  | 4.517411  | 5.682657  | L         |
| H-HC-0.079700  | 0  | 2.877270  | 2.234767  | 4.857672  | L         |
| H-HC-0.079700  | 0  | 2.980671  | 3.521083  | 3.651673  | L         |
| H-H-0.419600   | 0  | 0.925637  | 4.268967  | 7.032990  | L         |
| H-H-0.419600   | 0  | 1.652046  | 2.683724  | 6.718504  | L         |
| N-N--0.415700  | 0  | 6.388833  | 3.041863  | 6.609579  | L         |
| C-CT--0.149000 | -1 | 7.295136  | 2.291208  | 7.456936  | L         |
| H-H-0.271900   | 0  | 6.703834  | 3.916092  | 6.212541  | L         |
| H-H1-0.097600  | 0  | 8.047423  | 2.952279  | 7.886829  | L         |
| H-H1-0.097600  | 0  | 7.785348  | 1.513515  | 6.868168  | L         |
| H-H1-0.097600  | 0  | 6.736204  | 1.804545  | 8.259446  | L         |
| C-CT--0.366200 | -1 | -2.266051 | -2.768729 | 9.531654  | L         |
| C-C-0.597200   | 0  | -2.375109 | -3.859783 | 8.502942  | L         |
| O-O--0.567900  | 0  | -2.904299 | -4.928768 | 8.794923  | L         |
| H-HC-0.112300  | 0  | -1.215294 | -2.535912 | 9.693036  | L         |
| H-HC-0.112300  | 0  | -2.717590 | -3.108820 | 10.461230 | L         |
| H-HC-0.112300  | 0  | -2.786033 | -1.883879 | 9.169578  | L         |
| N-N--0.347900  | 0  | -1.853248 | -3.591699 | 7.309037  | L         |
| C-CT--0.240000 | -1 | -1.757684 | -4.555588 | 6.206383  | L         |
| C-C-0.734100   | 0  | -0.368089 | -4.557626 | 5.581475  | L         |
| O-O--0.589400  | 0  | 0.431051  | -3.653310 | 5.802551  | L         |
| C-CT--0.009400 | 0  | -2.905067 | -4.321800 | 5.214867  | L         |
| C-CT-0.018700  | 0  | -2.783201 | -3.020698 | 4.419006  | L H-HC 37 |
| C-CT--0.464524 | 0  | -4.033864 | -2.855498 | 3.553152  | H         |
| C-CT--0.195159 | 0  | -4.019112 | -1.581278 | 2.717671  | H         |
| N-N3--0.748751 | 0  | -3.028889 | -1.569856 | 1.624729  | H         |
| H-H-0.274700   | 0  | -1.467211 | -2.660245 | 7.169001  | L         |
| H-H1-0.142600  | 0  | -1.894603 | -5.553892 | 6.622814  | L         |
| H-HC-0.036200  | 0  | -3.844333 | -4.315621 | 5.770946  | L         |
| H-HC-0.036200  | 0  | -2.950287 | -5.148498 | 4.512932  | L         |
| H-HC-0.010300  | 0  | -1.893578 | -3.051117 | 3.788355  | L         |
| H-HC-0.010300  | 0  | -2.717015 | -2.178584 | 5.101865  | L         |
| H-HC-0.173903  | 0  | -4.905960 | -2.852465 | 4.214396  | H         |
| H-HC-0.148535  | 0  | -4.116665 | -3.728481 | 2.889132  | H         |
| H-HP-0.236066  | 0  | -3.842343 | -0.693521 | 3.330485  | H         |
| H-HP-0.172509  | 0  | -4.998322 | -1.447340 | 2.238498  | H         |
| H-H-0.437293   | 0  | -3.144976 | -0.098371 | 1.085775  | H         |
| H-H-0.366736   | 0  | -3.302443 | -2.274558 | 0.926664  | H         |
| H-H-0.419451   | 0  | -2.082446 | -1.778845 | 1.940571  | H         |
| N-N--0.415700  | 0  | -0.056878 | -5.608616 | 4.836119  | L         |
| C-CT--0.025200 | -1 | 1.264572  | -5.821410 | 4.253400  | L         |
| C-C-0.597300   | 0  | 1.144907  | -6.536999 | 2.906003  | L         |
| O-O--0.567900  | 0  | 1.720250  | -7.599925 | 2.681870  | L         |

|                |    |           |           |           |   |
|----------------|----|-----------|-----------|-----------|---|
| H-H-0.271900   | 0  | -0.789895 | -6.281313 | 4.633071  | L |
| H-H1-0.069800  | 0  | 1.869689  | -6.430585 | 4.924878  | L |
| H-H1-0.069800  | 0  | 1.769353  | -4.868664 | 4.089892  | L |
| N-N--0.415700  | 0  | 0.343747  | -5.942132 | 2.026089  | L |
| C-CT--0.025200 | -1 | -0.241254 | -6.537867 | 0.827228  | L |
| C-C-0.597300   | 0  | -1.371187 | -5.637764 | 0.388053  | L |
| O-O--0.567900  | 0  | -2.253959 | -5.360274 | 1.193686  | L |
| H-H-0.271900   | 0  | -0.083753 | -5.084513 | 2.350829  | L |
| H-H1-0.069800  | 0  | -0.637112 | -7.526222 | 1.060675  | L |
| H-H1-0.069800  | 0  | 0.516506  | -6.614106 | 0.047048  | L |
| N-N--0.415700  | 0  | -1.324968 | -5.178646 | -0.862122 | L |
| C-CT--0.001400 | -1 | -2.158858 | -4.093140 | -1.379875 | L |
| C-C-0.597300   | 0  | -3.629258 | -4.177746 | -0.955041 | L |
| O-O--0.567900  | 0  | -4.215448 | -3.208364 | -0.487820 | L |
| C-CT--0.015200 | 0  | -2.054414 | -4.048034 | -2.917874 | L |
| C-CA--0.001100 | 0  | -0.663579 | -4.213907 | -3.504355 | L |
| C-CA--0.190600 | 0  | 0.352846  | -3.295075 | -3.185638 | L |
| C-CA--0.190600 | 0  | -0.392929 | -5.278859 | -4.386988 | L |
| C-CA--0.234100 | 0  | 1.638970  | -3.440739 | -3.737808 | L |
| C-CA--0.234100 | 0  | 0.891776  | -5.428781 | -4.943670 | L |
| C-C-0.322600   | 0  | 1.911941  | -4.508187 | -4.617448 | L |
| O-OH--0.557900 | 0  | 3.147077  | -4.649898 | -5.167175 | L |
| H-H-0.271900   | 0  | -0.504313 | -5.396411 | -1.408822 | L |
| H-H1-0.087600  | 0  | -1.763817 | -3.154609 | -0.987663 | L |
| H-HC-0.029500  | 0  | -2.445285 | -3.093633 | -3.264008 | L |
| H-HC-0.029500  | 0  | -2.697700 | -4.822888 | -3.335856 | L |
| H-HA-0.169900  | 0  | 0.150278  | -2.469669 | -2.515619 | L |
| H-HA-0.169900  | 0  | -1.178967 | -5.970041 | -4.654620 | L |
| H-HA-0.165600  | 0  | 2.415988  | -2.734038 | -3.485091 | L |
| H-HA-0.165600  | 0  | 1.091586  | -6.237926 | -5.626978 | L |
| H-HO-0.399200  | 0  | 3.165286  | -5.370016 | -5.795450 | L |
| N-N--0.415700  | 0  | -4.219991 | -5.363915 | -1.098903 | L |
| C-CT--0.024900 | -1 | -5.563624 | -5.631848 | -0.607481 | L |
| C-C-0.597300   | 0  | -5.696331 | -5.558130 | 0.911359  | L |
| O-O--0.567900  | 0  | -5.065257 | -6.321381 | 1.651763  | L |
| C-CT-0.211700  | 0  | -6.032303 | -7.021808 | -1.041252 | L |
| O-OH--0.654600 | -1 | -7.287409 | -7.329341 | -0.453470 | L |
| H-H-0.271900   | 0  | -3.638789 | -6.114678 | -1.425535 | L |
| H-H1-0.084300  | 0  | -6.240605 | -4.900944 | -1.050409 | L |
| H-H1-0.035200  | 0  | -5.300658 | -7.763834 | -0.719305 | L |
| H-H1-0.035200  | 0  | -6.113368 | -7.054640 | -2.127783 | L |
| H-HO-0.427500  | -1 | -7.546121 | -8.200360 | -0.764416 | L |
| N-N--0.415700  | 0  | -6.666068 | -4.754607 | 1.340514  | L |
| C-CT-0.033700  | -1 | -7.164620 | -4.664538 | 2.701384  | L |
| C-C-0.597300   | 0  | -7.527403 | -5.991769 | 3.372044  | L |
| O-O--0.567900  | 0  | -7.471911 | -6.096943 | 4.595530  | L |
| C-CT--0.182500 | 0  | -8.350821 | -3.700069 | 2.706010  | L |
| H-H-0.271900   | 0  | -7.120203 | -4.168322 | 0.646615  | L |
| H-H1-0.082300  | 0  | -6.381499 | -4.224174 | 3.312967  | L |
| H-HC-0.060300  | 0  | -8.054386 | -2.733102 | 2.295256  | L |
| H-HC-0.060300  | 0  | -8.697754 | -3.563059 | 3.725625  | L |
| H-HC-0.060300  | 0  | -9.165079 | -4.115092 | 2.117726  | L |
| N-N--0.415700  | 0  | -7.911191 | -6.997153 | 2.584929  | L |
| C-CT--0.025200 | -1 | -8.297517 | -8.309162 | 3.089403  | L |

|                |    |            |            |           |           |
|----------------|----|------------|------------|-----------|-----------|
| C-C-0.597300   | 0  | -7.338060  | -9.439169  | 2.739552  | L         |
| O-O--0.567900  | 0  | -7.751864  | -10.595132 | 2.681988  | L         |
| H-H-0.271900   | 0  | -7.887373  | -6.829999  | 1.585340  | L         |
| H-H1-0.069800  | 0  | -9.272436  | -8.563223  | 2.674500  | L         |
| H-H1-0.069800  | 0  | -8.401552  | -8.288527  | 4.174478  | L         |
| N-N--0.415700  | 0  | -6.056717  | -9.128639  | 2.548695  | L         |
| C-CT--0.024900 | -1 | -4.983777  | -10.122467 | 2.566021  | L         |
| C-C-0.597300   | 0  | -4.287716  | -10.090160 | 3.920784  | L         |
| O-O--0.567900  | 0  | -3.966664  | -9.016616  | 4.440079  | L         |
| C-CT-0.211700  | 0  | -3.987296  | -9.827546  | 1.440088  | L         |
| O-OH--0.654600 | -1 | -3.104498  | -10.921992 | 1.248415  | L         |
| H-H-0.271900   | 0  | -5.803039  | -8.146662  | 2.606058  | L         |
| H-H1-0.084300  | 0  | -5.395714  | -11.117361 | 2.396426  | L         |
| H-H1-0.035200  | 0  | -3.420688  | -8.923973  | 1.671283  | L         |
| H-H1-0.035200  | 0  | -4.541629  | -9.664245  | 0.515056  | L         |
| H-HO-0.427500  | -1 | -2.562346  | -10.731974 | 0.479250  | L         |
| N-N--0.415700  | 0  | -4.091203  | -11.269837 | 4.508730  | L         |
| C-CT--0.149000 | -1 | -3.555031  | -11.422670 | 5.850039  | L         |
| H-H-0.271900   | 0  | -4.371212  | -12.086721 | 3.989549  | L         |
| H-H1-0.097600  | 0  | -3.352809  | -12.472902 | 6.060351  | L         |
| H-H1-0.097600  | 0  | -4.269721  | -11.039133 | 6.581544  | L         |
| H-H1-0.097600  | 0  | -2.627363  | -10.853473 | 5.947117  | L         |
| C-CT--0.366200 | -1 | -12.124877 | 5.111790   | -0.646708 | L         |
| C-C-0.597200   | 0  | -10.695320 | 5.286322   | -0.205649 | L         |
| O-O--0.567900  | 0  | -10.379067 | 5.005647   | 0.945054  | L         |
| H-HC-0.112300  | 0  | -12.515916 | 6.068180   | -0.986854 | L         |
| H-HC-0.112300  | 0  | -12.711930 | 4.755075   | 0.198044  | L         |
| H-HC-0.112300  | 0  | -12.161831 | 4.377385   | -1.449228 | L         |
| N-N--0.415700  | 0  | -9.844690  | 5.739431   | -1.122388 | L         |
| C-CT--0.025200 | -1 | -8.411278  | 5.896601   | -0.890699 | L         |
| C-C-0.597300   | 0  | -7.593165  | 5.808947   | -2.154561 | L         |
| O-O--0.567900  | 0  | -8.086758  | 6.151776   | -3.235119 | L         |
| H-H-0.271900   | 0  | -10.158864 | 5.915038   | -2.064386 | L         |
| H-H1-0.069800  | 0  | -8.099551  | 5.094781   | -0.231397 | L         |
| H-H1-0.069800  | 0  | -8.210390  | 6.851255   | -0.406616 | L         |
| N-N--0.415700  | 0  | -6.345731  | 5.367088   | -1.985428 | L H-H1 48 |
| C-CT--0.530209 | -1 | -5.324669  | 5.323632   | -3.032806 | H         |
| C-C-0.568093   | 0  | -4.586976  | 4.001569   | -2.933567 | H         |
| O-O--0.528105  | 0  | -4.530549  | 3.374312   | -1.870713 | H         |
| C-CT-0.298500  | 0  | -4.382577  | 6.547918   | -2.945147 | L H-H1 48 |
| C-CT--0.319200 | 0  | -5.132907  | 7.843021   | -3.261223 | L         |
| C-CT--0.319200 | 0  | -3.704334  | 6.679838   | -1.578755 | L         |
| H-H-0.271900   | 0  | -6.071818  | 5.043733   | -1.058895 | L         |
| H-H1-0.184096  | 0  | -5.838935  | 5.391911   | -3.998180 | H         |
| H-HC--0.029700 | 0  | -3.604637  | 6.438541   | -3.698988 | L         |
| H-HC-0.079100  | 0  | -5.865252  | 8.051292   | -2.482807 | L         |
| H-HC-0.079100  | 0  | -5.643762  | 7.743899   | -4.217958 | L         |
| H-HC-0.079100  | 0  | -4.424281  | 8.668459   | -3.315899 | L         |
| H-HC-0.079100  | 0  | -4.446977  | 6.817217   | -0.793904 | L         |
| H-HC-0.079100  | 0  | -3.029047  | 7.533665   | -1.582008 | L         |
| H-HC-0.079100  | 0  | -3.132181  | 5.779598   | -1.357799 | L         |
| N-N--0.610103  | 0  | -3.958696  | 3.573807   | -4.055638 | H         |
| C-CT--0.314060 | -1 | -4.211144  | 4.038019   | -5.412402 | H         |
| C-C-0.597300   | 0  | -5.331393  | 3.227116   | -6.045920 | L H-H1 50 |

|                |    |           |           |            |           |
|----------------|----|-----------|-----------|------------|-----------|
| O-O--0.567900  | 0  | -5.458460 | 2.023362  | -5.823634  | L         |
| C-CT--0.110200 | 0  | -2.917314 | 3.904680  | -6.252992  | L H-H1 50 |
| C-CT-0.353100  | 0  | -1.823510 | 4.960514  | -5.964551  | L         |
| C-CT--0.412100 | 0  | -1.087581 | 4.764899  | -4.635017  | L         |
| C-CT--0.412100 | 0  | -0.768837 | 4.917875  | -7.073584  | L         |
| H-H-0.398207   | 0  | -3.545377 | 2.649894  | -3.976720  | H         |
| H-H1-0.165130  | 0  | -4.495786 | 5.088236  | -5.409207  | H         |
| H-HC-0.045700  | 0  | -3.198383 | 4.003989  | -7.301820  | L         |
| H-HC-0.045700  | 0  | -2.499113 | 2.906258  | -6.123439  | L         |
| H-HC--0.036100 | 0  | -2.277105 | 5.952150  | -5.974007  | L         |
| H-HC-0.100000  | 0  | -0.718231 | 3.742441  | -4.565185  | L         |
| H-HC-0.100000  | 0  | -1.775363 | 4.961443  | -3.816223  | L         |
| H-HC-0.100000  | 0  | -0.258013 | 5.467116  | -4.557622  | L         |
| H-HC-0.100000  | 0  | -0.274516 | 3.947825  | -7.076963  | L         |
| H-HC-0.100000  | 0  | -0.026848 | 5.698231  | -6.904484  | L         |
| H-HC-0.100000  | 0  | -1.240630 | 5.088935  | -8.039963  | L         |
| N-N--0.415700  | 0  | -6.115668 | 3.878675  | -6.899365  | L         |
| C-CT--0.038900 | -1 | -7.300739 | 3.283334  | -7.528712  | L         |
| C-C-0.597300   | 0  | -7.050310 | 1.947166  | -8.216439  | L         |
| O-O--0.567900  | 0  | -7.920164 | 1.079486  | -8.237390  | L         |
| C-CT-0.365400  | -1 | -7.934565 | 4.213257  | -8.587710  | L         |
| O-OH--0.676100 | -1 | -7.870903 | 5.568532  | -8.134246  | L         |
| C-CT--0.243800 | 0  | -9.411817 | 3.921943  | -8.849791  | L         |
| H-H-0.271900   | 0  | -5.992518 | 4.876439  | -6.990114  | L         |
| H-H1-0.100700  | 0  | -8.044695 | 3.139912  | -6.751819  | L         |
| H-H1-0.004300  | 0  | -7.377825 | 4.139553  | -9.522885  | L         |
| H-HC-0.064200  | 0  | -9.525458 | 2.916741  | -9.255699  | L         |
| H-HC-0.064200  | 0  | -9.804404 | 4.633905  | -9.575671  | L         |
| H-HC-0.064200  | 0  | -9.978452 | 3.995099  | -7.920710  | L         |
| H-HO-0.410200  | -1 | -8.768494 | 5.905361  | -8.098809  | L         |
| N-N--0.415700  | 0  | -5.880267 | 1.819660  | -8.839426  | L         |
| C-CT--0.025200 | -1 | -5.495589 | 0.658912  | -9.629997  | L         |
| C-C-0.597300   | 0  | -4.590367 | -0.337623 | -8.939012  | L         |
| O-O--0.567900  | 0  | -4.088424 | -1.235009 | -9.615716  | L         |
| H-H-0.271900   | 0  | -5.203003 | 2.549614  | -8.680604  | L         |
| H-H1-0.069800  | 0  | -4.975594 | 1.002570  | -10.523104 | L         |
| H-H1-0.069800  | 0  | -6.384681 | 0.118963  | -9.955981  | L         |
| N-N--0.415700  | 0  | -4.373327 | -0.162437 | -7.630097  | L H-H1 54 |
| C-CT--0.539097 | -1 | -3.459832 | -0.967373 | -6.829281  | H         |
| C-C-0.572106   | 0  | -4.207231 | -1.446491 | -5.583787  | H         |
| O-O--0.533001  | 0  | -4.905025 | -2.453978 | -5.667194  | H         |
| C-CT-0.130300  | 0  | -2.078225 | -0.286635 | -6.664227  | L H-H1 54 |
| C-CT--0.043000 | 0  | -1.455227 | 0.125946  | -8.018971  | L         |
| C-CT--0.320400 | 0  | -1.166401 | -1.290983 | -5.936947  | L         |
| C-CT--0.066000 | 0  | -0.082925 | 0.802924  | -7.910306  | L         |
| H-H-0.271900   | 0  | -4.848834 | 0.600002  | -7.156701  | L         |
| H-H1-0.180646  | 0  | -3.281254 | -1.888653 | -7.395781  | H         |
| H-HC-0.018700  | 0  | -2.194880 | 0.610092  | -6.065642  | L         |
| H-HC-0.023600  | 0  | -2.116851 | 0.840777  | -8.506813  | L         |
| H-HC-0.023600  | 0  | -1.367355 | -0.751505 | -8.660887  | L         |
| H-HC-0.088200  | 0  | -1.059292 | -2.198021 | -6.530856  | L         |
| H-HC-0.088200  | 0  | -1.588096 | -1.552998 | -4.968540  | L         |
| H-HC-0.088200  | 0  | -0.183468 | -0.866067 | -5.754059  | L         |
| H-HC-0.018600  | 0  | -0.129340 | 1.618126  | -7.189841  | L         |

|                |    |            |           |           |           |
|----------------|----|------------|-----------|-----------|-----------|
| H-HC-0.018600  | 0  | 0.199104   | 1.203140  | -8.884195 | L         |
| H-HC-0.018600  | 0  | 0.673461   | 0.083193  | -7.600670 | L         |
| N-N--0.611145  | 0  | -4.088872  | -0.692682 | -4.464961 | H         |
| C-CT--0.109296 | -1 | -4.630155  | -1.081337 | -3.169476 | H         |
| C-C-0.597300   | 0  | -6.157851  | -1.089725 | -3.155346 | L H-H1 56 |
| O-O--0.567900  | 0  | -6.791256  | -2.017526 | -2.640112 | L         |
| C-CT--0.388038 | 0  | -4.046056  | -0.202372 | -2.070270 | H         |
| H-H-0.369964   | 0  | -3.494853  | 0.128613  | -4.454496 | H         |
| H-H1-0.178541  | 0  | -4.364275  | -2.122192 | -2.963798 | H         |
| H-H1-0.157964  | 0  | -4.501146  | -0.485322 | -1.117890 | H         |
| H-H1-0.179833  | 0  | -4.234328  | 0.864428  | -2.208120 | H         |
| H-HS-0.319500  | 0  | -2.327565  | 3.243461  | -1.366360 | H         |
| N-N--0.415700  | 0  | -6.747012  | -0.096478 | -3.811004 | L         |
| C-CT--0.087500 | -1 | -8.183369  | -0.030676 | -4.066820 | L         |
| C-C-0.597300   | 0  | -8.665226  | -1.179152 | -4.939453 | L         |
| O-O--0.567900  | 0  | -9.602755  | -1.882408 | -4.564804 | L         |
| C-CT-0.298500  | 0  | -8.576535  | 1.335969  | -4.645696 | L         |
| C-CT--0.319200 | 0  | -10.090121 | 1.463552  | -4.864375 | L         |
| C-CT--0.319200 | 0  | -8.145582  | 2.500388  | -3.739540 | L         |
| H-H-0.271900   | 0  | -6.109164  | 0.577223  | -4.224885 | L         |
| H-H1-0.096900  | 0  | -8.692893  | -0.134538 | -3.110757 | L         |
| H-HC--0.029700 | 0  | -8.082342  | 1.434595  | -5.603257 | L         |
| H-HC-0.079100  | 0  | -10.615438 | 1.301852  | -3.922734 | L         |
| H-HC-0.079100  | 0  | -10.426988 | 0.729710  | -5.596453 | L         |
| H-HC-0.079100  | 0  | -10.324780 | 2.457536  | -5.244106 | L         |
| H-HC-0.079100  | 0  | -8.613820  | 2.415540  | -2.760332 | L         |
| H-HC-0.079100  | 0  | -8.422257  | 3.453037  | -4.190461 | L         |
| H-HC-0.079100  | 0  | -7.063293  | 2.501974  | -3.605555 | L         |
| N-N--0.415700  | 0  | -8.033773  | -1.381035 | -6.094482 | L         |
| C-CT--0.025200 | -1 | -8.393732  | -2.435562 | -7.039312 | L         |
| C-C-0.597300   | 0  | -8.310258  | -3.839237 | -6.452709 | L         |
| O-O--0.567900  | 0  | -9.212393  | -4.650140 | -6.649623 | L         |
| H-H-0.271900   | 0  | -7.247363  | -0.780307 | -6.304212 | L         |
| H-H1-0.069800  | 0  | -7.724906  | -2.384903 | -7.898200 | L         |
| H-H1-0.069800  | 0  | -9.413383  | -2.269822 | -7.386729 | L         |
| N-N--0.415700  | 0  | -7.228417  | -4.120858 | -5.729028 | L         |
| C-CT--0.025200 | -1 | -7.008623  | -5.388811 | -5.044756 | L         |
| C-C-0.597300   | 0  | -7.939600  | -5.651538 | -3.872142 | L         |
| O-O--0.567900  | 0  | -8.272254  | -6.803995 | -3.601927 | L         |
| H-H-0.271900   | 0  | -6.508868  | -3.403301 | -5.660974 | L         |
| H-H1-0.069800  | 0  | -5.984835  | -5.411593 | -4.673011 | L         |
| H-H1-0.069800  | 0  | -7.130400  | -6.202719 | -5.759678 | L         |
| N-N--0.415700  | 0  | -8.328596  | -4.595850 | -3.160649 | L         |
| C-CT--0.038900 | -1 | -9.381859  | -4.657660 | -2.144894 | L         |
| C-C-0.597300   | 0  | -10.751538 | -4.945945 | -2.750562 | L         |
| O-O--0.567900  | 0  | -11.497818 | -5.780185 | -2.238299 | L         |
| C-CT-0.365400  | 0  | -9.420576  | -3.359475 | -1.323814 | L         |
| O-OH--0.676100 | 0  | -8.186753  | -3.195537 | -0.662708 | L         |
| C-CT--0.243800 | 0  | -10.509878 | -3.373113 | -0.251831 | L         |
| H-H-0.271900   | 0  | -7.942769  | -3.690671 | -3.405489 | L         |
| H-H1-0.100700  | 0  | -9.156863  | -5.476107 | -1.461124 | L         |
| H-H1-0.004300  | 0  | -9.584515  | -2.505361 | -1.980966 | L         |
| H-HC-0.064200  | 0  | -11.488922 | -3.264026 | -0.717128 | L         |
| H-HC-0.064200  | 0  | -10.356101 | -2.545204 | 0.439790  | L         |

|                |    |            |           |           |   |
|----------------|----|------------|-----------|-----------|---|
| H-HC-0.064200  | 0  | -10.478954 | -4.314493 | 0.295042  | L |
| H-HO-0.410200  | 0  | -7.595295  | -2.730790 | -1.289885 | L |
| N-N--0.415700  | 0  | -11.097556 | -4.235162 | -3.825036 | L |
| C-CT--0.149000 | -1 | -12.330252 | -4.420154 | -4.562528 | L |
| H-H-0.271900   | 0  | -10.427785 | -3.553942 | -4.171147 | L |
| H-H1-0.097600  | 0  | -12.399808 | -3.669647 | -5.350843 | L |
| H-H1-0.097600  | 0  | -13.182739 | -4.326674 | -3.888351 | L |
| H-H1-0.097600  | 0  | -12.335155 | -5.414416 | -5.012439 | L |
| N-N2--0.511415 | 0  | 2.004377   | -0.021485 | -1.689655 | H |
| C-CA-0.057801  | 0  | 0.685191   | 0.180531  | -1.694375 | H |
| C-CA-0.063496  | 0  | -0.001807  | 0.656459  | -2.817233 | H |
| C-CA--0.109122 | 0  | 0.738354   | 1.022565  | -3.942651 | H |
| C-CA--0.164490 | 0  | 2.114197   | 0.833775  | -3.930080 | H |
| C-CA-0.098392  | 0  | 2.700371   | 0.280229  | -2.795701 | H |
| C-C-0.541263   | 0  | -1.486688  | 0.688692  | -2.899861 | H |
| O-O--0.574884  | 0  | -2.070717  | 1.339305  | -3.764244 | H |
| N-N--0.751108  | 0  | -1.325842  | 3.188332  | -1.541898 | H |
| H-H4-0.220889  | 0  | 0.169064   | -0.036585 | -0.766312 | H |
| H-HA-0.160434  | 0  | 0.221785   | 1.425107  | -4.806568 | H |
| H-HA-0.142191  | 0  | 2.729285   | 1.098947  | -4.784130 | H |
| H-H4-0.174502  | 0  | 3.763095   | 0.070520  | -2.760135 | H |
| H-H-0.412468   | 0  | -1.146099  | 3.803845  | -2.334441 | H |
| H-H-0.353801   | 0  | -0.856594  | 3.638098  | -0.748913 | H |
| Zn-ZN-0.974537 | 0  | 2.866047   | -1.133212 | 0.041591  | H |
| O-OW--0.834000 | 0  | -2.140225  | -7.252210 | 3.448209  | L |
| H-HW-0.417000  | 0  | -2.587136  | -6.651065 | 2.832513  | L |
| H-HW-0.417000  | 0  | -2.859984  | -7.802545 | 3.798306  | L |
| O-OW--0.783903 | 0  | 1.304322   | -2.564694 | -0.131695 | H |
| H-HW-0.401253  | 0  | 0.926093   | -2.458016 | 0.785333  | H |
| H-HW-0.424111  | 0  | 1.901618   | -3.352047 | -0.183128 | H |
| O-OW--0.834000 | 0  | -3.638869  | -8.454620 | 7.183802  | L |
| H-HW-0.417000  | 0  | -3.715652  | -7.513359 | 7.359411  | L |
| H-HW-0.417000  | 0  | -3.778829  | -8.528168 | 6.227713  | L |
| O-OW--0.834000 | 0  | 7.225409   | -0.035665 | 1.858324  | L |
| H-HW-0.417000  | 0  | 6.913530   | 0.352393  | 2.695236  | L |
| H-HW-0.417000  | 0  | 6.440233   | 0.066906  | 1.298126  | L |
| O-OW--0.834000 | 0  | 7.047359   | -4.980318 | 4.771290  | L |
| H-HW-0.417000  | 0  | 6.096393   | -5.041867 | 4.996588  | L |
| H-HW-0.417000  | 0  | 7.262948   | -5.868605 | 4.484310  | L |
| O-OW--0.834000 | 0  | 8.596069   | -0.955189 | -0.259804 | L |
| H-HW-0.417000  | 0  | 8.179008   | -0.577295 | 0.540375  | L |
| H-HW-0.417000  | 0  | 8.845041   | -0.166117 | -0.762002 | L |
| O-OW--0.834000 | 0  | 12.627649  | -1.079330 | -1.912190 | L |
| H-HW-0.417000  | 0  | 11.785548  | -0.831579 | -2.330977 | L |
| H-HW-0.417000  | 0  | 12.648253  | -2.039941 | -2.042244 | L |
| O-OW--0.834000 | 0  | 8.268072   | -3.327640 | 0.985757  | L |
| H-HW-0.417000  | 0  | 8.462303   | -2.560645 | 0.408129  | L |
| H-HW-0.417000  | 0  | 7.558088   | -2.988420 | 1.540542  | L |
| O-OW--0.834000 | 0  | 4.357193   | -4.940450 | 5.168174  | L |
| H-HW-0.417000  | 0  | 4.089569   | -4.555040 | 6.025396  | L |
| H-HW-0.417000  | 0  | 4.033224   | -4.285957 | 4.539239  | L |
| S-SH--0.326142 | 0  | -2.249448  | -0.475547 | -1.814336 | H |

**IC2'**

|                |    |            |           |           |        |
|----------------|----|------------|-----------|-----------|--------|
| C-CT--0.3662   | -1 | -10.301742 | 3.974122  | 3.993757  | L      |
| C-C-0.5972     | 0  | -8.974319  | 3.318406  | 3.749304  | L      |
| O-O--0.5679    | 0  | -8.392999  | 2.763048  | 4.675196  | L      |
| H-HC-0.1123    | 0  | -11.048691 | 3.507944  | 3.354347  | L      |
| H-HC-0.1123    | 0  | -10.221194 | 5.033245  | 3.755340  | L      |
| H-HC-0.1123    | 0  | -10.575325 | 3.847491  | 5.038785  | L      |
| N-N--0.415700  | 0  | -8.521436  | 3.388197  | 2.504049  | L      |
| C-CT--0.059700 | -1 | -7.335953  | 2.687294  | 2.004522  | L      |
| C-C-0.597300   | 0  | -6.195000  | 3.678708  | 1.825736  | L      |
| O-O--0.567900  | 0  | -6.355751  | 4.684936  | 1.140324  | L      |
| C-CT-0.130300  | 0  | -7.651571  | 1.922984  | 0.694390  | L      |
| C-CT--0.043000 | 0  | -8.853416  | 0.961670  | 0.880534  | L      |
| C-CT--0.320400 | 0  | -6.416728  | 1.125174  | 0.236440  | L      |
| C-CT--0.066000 | 0  | -9.347888  | 0.314546  | -0.417343 | L      |
| H-H-0.271900   | 0  | -9.057716  | 3.944145  | 1.846412  | L      |
| H-H1-0.086900  | 0  | -7.024883  | 1.948328  | 2.742703  | L      |
| H-HC-0.018700  | 0  | -7.902500  | 2.650001  | -0.080208 | L      |
| H-HC-0.023600  | 0  | -9.701210  | 1.507734  | 1.292202  | L      |
| H-HC-0.023600  | 0  | -8.585172  | 0.176085  | 1.588092  | L      |
| H-HC-0.088200  | 0  | -6.150722  | 0.365290  | 0.971186  | L      |
| H-HC-0.088200  | 0  | -5.559761  | 1.785808  | 0.094352  | L      |
| H-HC-0.088200  | 0  | -6.601727  | 0.651898  | -0.725651 | L      |
| H-HC-0.018600  | 0  | -9.563756  | 1.084943  | -1.156195 | L      |
| H-HC-0.018600  | 0  | -10.262845 | -0.241030 | -0.215619 | L      |
| H-HC-0.018600  | 0  | -8.600190  | -0.374666 | -0.806395 | L      |
| N-N--0.516300  | 0  | -5.081603  | 3.399860  | 2.498301  | L      |
| C-CT-0.038100  | -1 | -3.766012  | 4.012431  | 2.364658  | L H-HC |
| C-C-0.536600   | 0  | -3.669788  | 5.531233  | 2.125859  | L      |
| O-O--0.581900  | 0  | -2.671874  | 6.045738  | 1.620245  | L      |
| C-CT--0.547145 | 0  | -3.018725  | 3.213375  | 1.298191  | H      |
| C-C-0.532653   | 0  | -2.758350  | 1.773961  | 1.698695  | H      |
| O-O2--0.588507 | 0  | -2.572848  | 1.460004  | 2.881003  | H      |
| O-O2--0.625559 | 0  | -2.697653  | 0.946995  | 0.696250  | H      |
| H-H-0.293600   | 0  | -5.064928  | 2.513962  | 2.986957  | L      |
| H-H1-0.088000  | 0  | -3.240778  | 3.849750  | 3.306306  | L      |
| H-HC-0.128435  | 0  | -2.034673  | 3.686991  | 1.160276  | H      |
| H-HC-0.183556  | 0  | -3.534712  | 3.291103  | 0.337769  | H      |
| N-N--0.415700  | 0  | -4.647578  | 6.290938  | 2.600254  | L      |
| C-CT--0.025200 | -1 | -4.631196  | 7.734022  | 2.469826  | L      |
| C-C-0.597300   | 0  | -3.733987  | 8.382327  | 3.509575  | L      |
| O-O--0.567900  | 0  | -4.209363  | 9.054415  | 4.426215  | L      |
| H-H-0.271900   | 0  | -5.482545  | 5.791742  | 2.866110  | L      |
| H-H1-0.069800  | 0  | -5.643266  | 8.114902  | 2.598158  | L      |
| H-H1-0.069800  | 0  | -4.283439  | 8.013823  | 1.474120  | L      |
| N-N--0.415700  | 0  | -2.430868  | 8.165609  | 3.365525  | L      |
| C-CT--0.038900 | -1 | -1.407518  | 8.595156  | 4.309018  | L      |
| C-C-0.597300   | 0  | -0.500657  | 9.679560  | 3.714881  | L      |
| O-O--0.567900  | 0  | -0.603646  | 10.053358 | 2.545288  | L      |
| C-CT-0.365400  | 0  | -0.556262  | 7.435492  | 4.871268  | L      |
| O-OH--0.676100 | 0  | 0.609271   | 7.253737  | 4.107299  | L      |
| C-CT--0.243800 | 0  | -1.276875  | 6.097414  | 5.002032  | L      |
| H-H-0.271900   | 0  | -2.167305  | 7.562407  | 2.588502  | L      |
| H-H1-0.100700  | 0  | -1.909689  | 9.046111  | 5.163035  | L      |



|                |    |           |           |           |   |
|----------------|----|-----------|-----------|-----------|---|
| H-H1-0.004300  | 0  | -0.234861 | 7.729641  | 5.870977  | L |
| H-HC-0.064200  | 0  | -2.211575 | 6.233791  | 5.544006  | L |
| H-HC-0.064200  | 0  | -0.643432 | 5.402476  | 5.547801  | L |
| H-HC-0.064200  | 0  | -1.481205 | 5.679251  | 4.016780  | L |
| H-HO-0.410200  | 0  | 1.112976  | 6.503465  | 4.491322  | L |
| N-N--0.415700  | 0  | 0.424093  | 10.183965 | 4.535934  | L |
| C-CT--0.025200 | -1 | 1.467926  | 11.112725 | 4.114332  | L |
| C-C-0.597300   | 0  | 2.362564  | 10.615161 | 2.987765  | L |
| O-O--0.567900  | 0  | 2.689731  | 11.382402 | 2.087415  | L |
| H-H-0.271900   | 0  | 0.487697  | 9.781519  | 5.455624  | L |
| H-H1-0.069800  | 0  | 2.106970  | 11.346346 | 4.964729  | L |
| H-H1-0.069800  | 0  | 0.999133  | 12.037757 | 3.777956  | L |
| N-N--0.516300  | 0  | 2.762356  | 9.347992  | 3.054984  | L |
| C-CT-0.038100  | -1 | 3.668820  | 8.740075  | 2.082118  | L |
| C-C-0.536600   | 0  | 3.035224  | 8.434790  | 0.738408  | L |
| O-O--0.581900  | 0  | 3.768220  | 8.129739  | -0.195728 | L |
| C-CT--0.030300 | 0  | 4.247245  | 7.428426  | 2.643872  | L |
| C-C-0.799400   | -1 | 5.594965  | 7.627546  | 3.317379  | L |
| O-O2--0.801400 | -1 | 6.178602  | 8.729590  | 3.230713  | L |
| O-O2--0.801400 | -1 | 6.051415  | 6.676129  | 3.983471  | L |
| H-H-0.293600   | 0  | 2.394293  | 8.749803  | 3.780454  | L |
| H-H1-0.088000  | 0  | 4.473592  | 9.442006  | 1.860796  | L |
| H-HC--0.012200 | 0  | 4.399187  | 6.704994  | 1.841025  | L |
| H-HC--0.012200 | 0  | 3.542962  | 6.981714  | 3.348648  | L |
| N-N--0.415700  | 0  | 1.712425  | 8.515092  | 0.625275  | L |
| C-CT--0.002400 | -1 | 1.000119  | 8.324025  | -0.631425 | L |
| C-C-0.597300   | 0  | 0.419064  | 9.622752  | -1.190471 | L |
| O-O--0.567900  | 0  | 0.403586  | 9.828425  | -2.404161 | L |
| C-CT--0.034300 | 0  | -0.079945 | 7.246358  | -0.473245 | L |
| C-CA-0.011800  | 0  | 0.432289  | 5.883365  | -0.037374 | L |
| C-CA--0.125600 | 0  | 0.961699  | 4.977288  | -0.976136 | L |
| C-CA--0.125600 | 0  | 0.325247  | 5.496397  | 1.309287  | L |
| C-CA--0.170400 | 0  | 1.363181  | 3.692898  | -0.563561 | L |
| C-CA--0.170400 | 0  | 0.720023  | 4.214259  | 1.723346  | L |
| C-CA--0.107200 | 0  | 1.231337  | 3.309838  | 0.780755  | L |
| H-H-0.271900   | 0  | 1.190855  | 8.718513  | 1.465242  | L |
| H-H1-0.097800  | 0  | 1.691197  | 7.954644  | -1.388554 | L |
| H-HC-0.029500  | 0  | -0.582297 | 7.123125  | -1.433255 | L |
| H-HC-0.029500  | 0  | -0.827080 | 7.594496  | 0.241616  | L |
| H-HA-0.133000  | 0  | 1.016350  | 5.247338  | -2.020117 | L |
| H-HA-0.133000  | 0  | -0.120327 | 6.174244  | 2.015312  | L |
| H-HA-0.143000  | 0  | 1.711640  | 2.967467  | -1.284115 | L |
| H-HA-0.143000  | 0  | 0.580531  | 3.911040  | 2.750285  | L |
| H-HA-0.129700  | 0  | 1.482690  | 2.304942  | 1.077427  | L |
| N-N--0.4157    | 0  | -0.032439 | 10.523389 | -0.315640 | L |
| C-CT--0.1490   | -1 | -0.437848 | 11.862048 | -0.693073 | L |
| H-H-0.2719     | 0  | -0.030021 | 10.270052 | 0.667133  | L |
| H-H1-0.0976    | 0  | -0.817406 | 12.388477 | 0.183146  | L |
| H-H1-0.0976    | 0  | -1.218837 | 11.807124 | -1.453327 | L |
| H-H1-0.0976    | 0  | 0.420058  | 12.400801 | -1.098108 | L |
| C-CT--0.3662   | -1 | 8.010148  | 8.420600  | -0.192039 | L |
| C-C-0.5972     | 0  | 7.546319  | 7.624238  | -1.388085 | L |
| O-O--0.5679    | 0  | 8.367545  | 7.271434  | -2.231087 | L |
| H-HC-0.1123    | 0  | 7.572745  | 9.415840  | -0.227966 | L |

|                |    |           |           |           |   |
|----------------|----|-----------|-----------|-----------|---|
| H-HC-0.1123    | 0  | 9.095494  | 8.488141  | -0.205060 | L |
| H-HC-0.1123    | 0  | 7.692862  | 7.917472  | 0.722289  | L |
| N-N--0.415700  | 0  | 6.235373  | 7.384452  | -1.485335 | L |
| C-CT--0.051800 | -1 | 5.586051  | 6.839084  | -2.685525 | L |
| C-C-0.597300   | 0  | 4.918835  | 7.937785  | -3.512949 | L |
| O-O--0.567900  | 0  | 5.240190  | 8.145136  | -4.683166 | L |
| C-CT--0.110200 | 0  | 4.665004  | 5.647746  | -2.349405 | L |
| C-CT-0.353100  | 0  | 4.876150  | 4.480081  | -3.333763 | L |
| C-CT--0.412100 | 0  | 4.013962  | 3.286302  | -2.952059 | L |
| C-CT--0.412100 | 0  | 4.530025  | 4.822882  | -4.786123 | L |
| H-H-0.271900   | 0  | 5.631084  | 7.707106  | -0.736842 | L |
| H-H1-0.092200  | 0  | 6.382950  | 6.453191  | -3.322055 | L |
| H-HC-0.045700  | 0  | 3.619733  | 5.959498  | -2.356641 | L |
| H-HC-0.045700  | 0  | 4.896964  | 5.287419  | -1.346678 | L |
| H-HC--0.036100 | 0  | 5.920116  | 4.166181  | -3.288458 | L |
| H-HC-0.100000  | 0  | 2.963052  | 3.506918  | -3.140091 | L |
| H-HC-0.100000  | 0  | 4.143021  | 3.053129  | -1.897011 | L |
| H-HC-0.100000  | 0  | 4.317933  | 2.423322  | -3.539890 | L |
| H-HC-0.100000  | 0  | 3.517577  | 5.224549  | -4.840282 | L |
| H-HC-0.100000  | 0  | 4.595692  | 3.929335  | -5.405311 | L |
| H-HC-0.100000  | 0  | 5.229074  | 5.561588  | -5.174768 | L |
| N-N--0.4157    | 0  | 4.020922  | 8.666698  | -2.864007 | L |
| C-CT--0.1490   | -1 | 3.388304  | 9.872671  | -3.330303 | L |
| H-H-0.2719     | 0  | 3.856352  | 8.386944  | -1.904772 | L |
| H-H1-0.0976    | 0  | 4.092649  | 10.459689 | -3.920971 | L |
| H-H1-0.0976    | 0  | 3.048915  | 10.463095 | -2.477989 | L |
| H-H1-0.0976    | 0  | 2.526915  | 9.616615  | -3.949545 | L |
| C-CT--0.3662   | -1 | -8.723867 | 2.445774  | 8.110817  | L |
| C-C-0.5972     | 0  | -7.862245 | 1.227260  | 7.939153  | L |
| O-O--0.5679    | 0  | -7.555500 | 0.544460  | 8.909952  | L |
| H-HC-0.1123    | 0  | -9.640244 | 2.313271  | 7.538922  | L |
| H-HC-0.1123    | 0  | -8.183145 | 3.316301  | 7.742495  | L |
| H-HC-0.1123    | 0  | -8.956833 | 2.571965  | 9.165930  | L |
| N-N--0.415700  | 0  | -7.465900 | 0.971530  | 6.700783  | L |
| C-CT--0.038900 | -1 | -6.668054 | -0.186766 | 6.293799  | L |
| C-C-0.597300   | 0  | -5.400589 | 0.293766  | 5.611019  | L |
| O-O--0.567900  | 0  | -5.438362 | 0.721666  | 4.458437  | L |
| C-CT-0.365400  | 0  | -7.478287 | -1.152354 | 5.415418  | L |
| O-OH--0.676100 | 0  | -8.037495 | -0.488409 | 4.308000  | L |
| C-CT--0.243800 | 0  | -8.625082 | -1.773476 | 6.218463  | L |
| H-H-0.271900   | 0  | -7.784819 | 1.594468  | 5.962127  | L |
| H-H1-0.100700  | 0  | -6.369562 | -0.747338 | 7.179273  | L |
| H-H1-0.004300  | 0  | -6.822147 | -1.948361 | 5.062103  | L |
| H-HC-0.064200  | 0  | -8.224460 | -2.307447 | 7.079731  | L |
| H-HC-0.064200  | 0  | -9.181996 | -2.470317 | 5.598252  | L |
| H-HC-0.064200  | 0  | -9.309970 | -0.997456 | 6.558522  | L |
| H-HO-0.410200  | 0  | -7.343294 | 0.085592  | 3.952463  | L |
| N-N--0.415700  | 0  | -4.309246 | 0.286086  | 6.380689  | L |
| C-CT--0.059700 | -1 | -3.111009 | 1.097577  | 6.155173  | L |
| C-C-0.597300   | 0  | -1.866287 | 0.215691  | 6.093342  | L |
| O-O--0.567900  | 0  | -1.607538 | -0.571681 | 7.008728  | L |
| C-CT-0.130300  | 0  | -2.987761 | 2.187191  | 7.245904  | L |
| C-CT--0.043000 | 0  | -4.244145 | 3.081477  | 7.394271  | L |
| C-CT--0.320400 | 0  | -1.749322 | 3.060563  | 6.995484  | L |

|                |    |           |           |          |   |      |     |
|----------------|----|-----------|-----------|----------|---|------|-----|
| C-CT--0.066000 | 0  | -4.670311 | 3.856848  | 6.138638 | L |      |     |
| H-H-0.271900   | 0  | -4.377839 | -0.148117 | 7.286465 | L |      |     |
| H-H1-0.086900  | 0  | -3.208927 | 1.605100  | 5.196635 | L |      |     |
| H-HC-0.018700  | 0  | -2.842587 | 1.686711  | 8.205147 | L |      |     |
| H-HC-0.023600  | 0  | -4.062295 | 3.803174  | 8.191376 | L |      |     |
| H-HC-0.023600  | 0  | -5.083324 | 2.465967  | 7.717245 | L |      |     |
| H-HC-0.088200  | 0  | -1.748941 | 3.410141  | 5.962749 | L |      |     |
| H-HC-0.088200  | 0  | -0.846905 | 2.471618  | 7.160922 | L |      |     |
| H-HC-0.088200  | 0  | -1.736953 | 3.911188  | 7.675601 | L |      |     |
| H-HC-0.018600  | 0  | -3.871133 | 4.518119  | 5.808300 | L |      |     |
| H-HC-0.018600  | 0  | -5.550179 | 4.457977  | 6.368202 | L |      |     |
| H-HC-0.018600  | 0  | -4.923890 | 3.169723  | 5.334612 | L |      |     |
| N-N--0.516300  | 0  | -1.118533 | 0.374335  | 5.005733 | L |      |     |
| C-CT-0.038100  | -1 | 0.182552  | -0.205101 | 4.729106 | L | H-HC | 178 |
| C-C-0.536600   | 0  | 1.117386  | -0.044298 | 5.933792 | L |      |     |
| O-O--0.581900  | 0  | 1.327170  | 1.049422  | 6.452613 | L |      |     |
| C-CT--0.520019 | 0  | 0.688225  | 0.437388  | 3.420748 | H |      |     |
| C-C-0.636404   | 0  | 0.920285  | -0.520474 | 2.257669 | H |      |     |
| O-O2--0.608036 | 0  | 0.262690  | -1.593603 | 2.151555 | H |      |     |
| O-O2--0.608131 | 0  | 1.792833  | -0.107670 | 1.419820 | H |      |     |
| H-H-0.293600   | 0  | -1.517136 | 0.950456  | 4.269334 | L |      |     |
| H-H1-0.088000  | 0  | 0.034150  | -1.274134 | 4.567760 | L |      |     |
| H-HC-0.132300  | 0  | 1.631069  | 0.954110  | 3.616771 | H |      |     |
| H-HC-0.188993  | 0  | -0.020068 | 1.201508  | 3.081249 | H |      |     |
| N-N--0.415700  | 0  | 1.663882  | -1.154095 | 6.398343 | L |      |     |
| C-CT-0.033700  | -1 | 2.561306  | -1.200911 | 7.530069 | L |      |     |
| C-C-0.597300   | 0  | 3.781718  | -2.025895 | 7.137614 | L |      |     |
| O-O--0.567900  | 0  | 3.830897  | -3.249850 | 7.304432 | L |      |     |
| C-CT--0.182500 | 0  | 1.799715  | -1.754182 | 8.742837 | L |      |     |
| H-H-0.271900   | 0  | 1.358861  | -2.031137 | 5.991054 | L |      |     |
| H-H1-0.082300  | 0  | 2.907786  | -0.195981 | 7.779041 | L |      |     |
| H-HC-0.060300  | 0  | 0.961169  | -1.096222 | 8.974499 | L |      |     |
| H-HC-0.060300  | 0  | 2.467741  | -1.804765 | 9.602310 | L |      |     |
| H-HC-0.060300  | 0  | 1.420441  | -2.752797 | 8.520024 | L |      |     |
| N-N--0.4157    | 0  | 4.752857  | -1.336872 | 6.550627 | L |      |     |
| C-CT-0.0188    | -1 | 5.956247  | -1.925647 | 6.007549 | L | H-HC | 200 |
| C-C-0.5973     | 0  | 7.154863  | -1.773235 | 6.953190 | L |      |     |
| O-O--0.5679    | 0  | 7.206057  | -0.916372 | 7.838057 | L |      |     |
| C-CT--0.517456 | 0  | 6.207535  | -1.301676 | 4.633189 | H |      |     |
| C-CM-0.287351  | 0  | 5.332102  | -1.786527 | 3.536339 | H |      |     |
| N-N2--0.586994 | 0  | 5.473962  | -3.043432 | 2.963911 | H |      |     |
| C-CM--0.020338 | 0  | 4.350652  | -1.181819 | 2.801925 | H |      |     |
| C-CM-0.242458  | 0  | 4.605344  | -3.138521 | 1.922601 | H |      |     |
| N-N2--0.505070 | 0  | 3.915460  | -2.020007 | 1.795560 | H |      |     |
| H-H-0.2719     | 0  | 4.647801  | -0.328278 | 6.481750 | L |      |     |
| H-H1-0.0881    | 0  | 5.807056  | -2.992658 | 5.875589 | L |      |     |
| H-HC-0.166355  | 0  | 7.261108  | -1.473291 | 4.367735 | H |      |     |
| H-HC-0.174481  | 0  | 6.097972  | -0.221840 | 4.760102 | H |      |     |
| H-H-0.335795   | 0  | 6.121555  | -3.759149 | 3.286404 | H |      |     |
| H-H4-0.152777  | 0  | 3.947562  | -0.187656 | 2.922058 | H |      |     |
| H-H5-0.209475  | 0  | 4.504899  | -4.006586 | 1.285934 | H |      |     |
| N-N--0.4157    | 0  | 8.155912  | -2.618112 | 6.713411 | L |      |     |
| C-CT--0.1490   | -1 | 9.424222  | -2.548745 | 7.405877 | L |      |     |
| H-H-0.2719     | 0  | 8.001094  | -3.301979 | 5.979250 | L |      |     |

|                |    |           |            |           |            |
|----------------|----|-----------|------------|-----------|------------|
| H-H1-0.0976    | 0  | 10.094205 | -3.323732  | 7.032440  | L          |
| H-H1-0.0976    | 0  | 9.263954  | -2.689085  | 8.476237  | L          |
| H-H1-0.0976    | 0  | 9.875922  | -1.568528  | 7.242857  | L          |
| C-CT--0.3662   | -1 | 8.333934  | -9.396141  | 0.978195  | L          |
| C-C-0.5972     | 0  | 8.716397  | -9.180495  | -0.473755 | L          |
| O-O--0.5679    | 0  | 9.755622  | -8.586962  | -0.735380 | L          |
| H-HC-0.1123    | 0  | 8.246903  | -10.460356 | 1.183943  | L          |
| H-HC-0.1123    | 0  | 7.397117  | -8.883111  | 1.188079  | L          |
| H-HC-0.1123    | 0  | 9.113776  | -8.967193  | 1.607304  | L          |
| N-N--0.254800  | 0  | 7.895118  | -9.637313  | -1.435833 | L          |
| C-CT--0.026600 | -1 | 8.138443  | -9.406083  | -2.861983 | L          |
| C-C-0.589600   | 0  | 7.997423  | -7.933567  | -3.247677 | L          |
| O-O--0.574800  | 0  | 8.715058  | -7.442741  | -4.116134 | L          |
| C-CT--0.007000 | 0  | 7.125124  | -10.295354 | -3.590371 | L          |
| C-CT-0.018900  | 0  | 5.964730  | -10.409305 | -2.600389 | L          |
| C-CT-0.019200  | 0  | 6.657473  | -10.379925 | -1.237112 | L          |
| H-H1-0.064100  | 0  | 9.148745  | -9.723866  | -3.122769 | L          |
| H-HC-0.025300  | 0  | 7.562137  | -11.282298 | -3.749502 | L          |
| H-HC-0.025300  | 0  | 6.806627  | -9.866238  | -4.541695 | L          |
| H-HC-0.021300  | 0  | 5.398176  | -11.329656 | -2.745082 | L          |
| H-HC-0.021300  | 0  | 5.311314  | -9.540920  | -2.698127 | L          |
| H-H1-0.039100  | 0  | 6.013208  | -9.897510  | -0.500663 | L          |
| H-H1-0.039100  | 0  | 6.893952  | -11.397034 | -0.921787 | L          |
| N-N--0.516300  | 0  | 7.074446  | -7.231882  | -2.588920 | L          |
| C-CT-0.039700  | -1 | 6.824065  | -5.805810  | -2.769564 | L          |
| C-C-0.536600   | 0  | 8.084737  | -4.941882  | -2.642814 | L          |
| O-O--0.581900  | 0  | 8.263940  | -3.962879  | -3.370821 | L          |
| C-CT-0.056000  | 0  | 5.722738  | -5.359677  | -1.800780 | L H-HC 244 |
| C-CT--0.515956 | 0  | 5.181196  | -3.983263  | -2.199641 | H          |
| C-C-0.587828   | 0  | 4.102975  | -3.428500  | -1.275359 | H          |
| O-O2--0.600319 | 0  | 4.066384  | -2.146062  | -1.239298 | H          |
| O-O2--0.589127 | 0  | 3.336705  | -4.204460  | -0.659039 | H          |
| H-H-0.293600   | 0  | 6.534639  | -7.704626  | -1.883290 | L          |
| H-H1-0.110500  | 0  | 6.451346  | -5.658246  | -3.783596 | L          |
| H-HC--0.017300 | 0  | 6.118775  | -5.322069  | -0.784784 | L          |
| H-HC--0.017300 | 0  | 4.904134  | -6.080520  | -1.835085 | L          |
| H-HC-0.167759  | 0  | 4.760797  | -4.057006  | -3.209895 | H          |
| H-HC-0.135230  | 0  | 6.002310  | -3.259642  | -2.241953 | H          |
| N-N--0.415700  | 0  | 8.992614  | -5.345499  | -1.756689 | L          |
| C-CT--0.024900 | -1 | 10.234629 | -4.648625  | -1.443778 | L          |
| C-C-0.597300   | 0  | 11.257184 | -4.545809  | -2.568563 | L          |
| O-O--0.567900  | 0  | 12.240459 | -3.816621  | -2.437005 | L          |
| C-CT-0.211700  | 0  | 10.873360 | -5.285036  | -0.203031 | L          |
| O-OH--0.654600 | 0  | 9.916778  | -5.474561  | 0.829231  | L          |
| H-H-0.271900   | 0  | 8.778514  | -6.150253  | -1.184228 | L          |
| H-H1-0.084300  | 0  | 9.972413  | -3.622916  | -1.179822 | L          |
| H-H1-0.035200  | 0  | 11.673172 | -4.638020  | 0.160156  | L          |
| H-H1-0.035200  | 0  | 11.298611 | -6.253583  | -0.470418 | L          |
| H-HO-0.427500  | 0  | 9.365989  | -4.663775  | 0.908872  | L          |
| N-N--0.415700  | 0  | 11.016503 | -5.234207  | -3.682478 | L          |
| C-CT-0.033700  | -1 | 11.768838 | -5.079003  | -4.920659 | L          |
| C-C-0.597300   | 0  | 10.940155 | -4.523764  | -6.083636 | L          |
| O-O--0.567900  | 0  | 11.374723 | -4.542322  | -7.234537 | L          |
| C-CT--0.182500 | 0  | 12.390723 | -6.444226  | -5.248769 | L          |

|                |    |           |           |           |   |
|----------------|----|-----------|-----------|-----------|---|
| H-H-0.271900   | 0  | 10.199970 | -5.835211 | -3.688664 | L |
| H-H1-0.082300  | 0  | 12.587059 | -4.373878 | -4.768206 | L |
| H-HC-0.060300  | 0  | 13.004375 | -6.781355 | -4.412662 | L |
| H-HC-0.060300  | 0  | 13.018654 | -6.359142 | -6.136297 | L |
| H-HC-0.060300  | 0  | 11.601856 | -7.174331 | -5.436820 | L |
| N-N--0.415700  | 0  | 9.762143  | -4.000309 | -5.762130 | L |
| C-CT--0.025200 | -1 | 8.860416  | -3.322340 | -6.670473 | L |
| C-C-0.597300   | 0  | 8.810301  | -1.817988 | -6.454858 | L |
| O-O--0.567900  | 0  | 8.844475  | -1.047899 | -7.412021 | L |
| H-H-0.271900   | 0  | 9.482090  | -4.051101 | -4.788767 | L |
| H-H1-0.069800  | 0  | 7.853917  | -3.714820 | -6.528574 | L |
| H-H1-0.069800  | 0  | 9.153504  | -3.508433 | -7.704164 | L |
| N-N--0.415700  | 0  | 8.732769  | -1.408292 | -5.191885 | L |
| C-CT--0.002400 | -1 | 8.586101  | -0.017911 | -4.779625 | L |
| C-C-0.597300   | 0  | 9.712206  | 0.414396  | -3.832830 | L |
| O-O--0.567900  | 0  | 10.342037 | -0.437082 | -3.196911 | L |
| C-CT--0.034300 | 0  | 7.207023  | 0.132044  | -4.110526 | L |
| C-CA-0.011800  | 0  | 6.044097  | -0.046972 | -5.068365 | L |
| C-CA--0.125600 | 0  | 5.744590  | 0.960742  | -6.005260 | L |
| C-CA--0.125600 | 0  | 5.275281  | -1.225863 | -5.044072 | L |
| C-CA--0.170400 | 0  | 4.692533  | 0.785202  | -6.922083 | L |
| C-CA--0.170400 | 0  | 4.219377  | -1.398002 | -5.956605 | L |
| C-CA--0.107200 | 0  | 3.932592  | -0.397456 | -6.901182 | L |
| H-H-0.271900   | 0  | 8.719100  | -2.113696 | -4.464412 | L |
| H-H1-0.097800  | 0  | 8.619001  | 0.626386  | -5.658208 | L |
| H-HC-0.029500  | 0  | 7.119233  | 1.117631  | -3.654346 | L |
| H-HC-0.029500  | 0  | 7.128747  | -0.597613 | -3.302780 | L |
| H-HA-0.133000  | 0  | 6.326748  | 1.870269  | -6.028180 | L |
| H-HA-0.133000  | 0  | 5.492412  | -2.002485 | -4.325495 | L |
| H-HA-0.143000  | 0  | 4.465124  | 1.560711  | -7.639593 | L |
| H-HA-0.143000  | 0  | 3.621228  | -2.296994 | -5.927015 | L |
| H-HA-0.129700  | 0  | 3.117258  | -0.532114 | -7.597883 | L |
| N-N--0.254800  | 0  | 9.967975  | 1.728699  | -3.688954 | L |
| C-CT--0.026600 | -1 | 10.828283 | 2.226249  | -2.621329 | L |
| C-C-0.589600   | 0  | 10.194353 | 1.977122  | -1.243896 | L |
| O-O--0.574800  | 0  | 9.002390  | 1.663037  | -1.164902 | L |
| C-CT--0.007000 | 0  | 10.984819 | 3.726188  | -2.904693 | L |
| C-CT-0.018900  | 0  | 9.668277  | 4.091480  | -3.587846 | L |
| C-CT-0.019200  | 0  | 9.364683  | 2.842803  | -4.415429 | L |
| H-H1-0.064100  | 0  | 11.799235 | 1.734867  | -2.675168 | L |
| H-HC-0.025300  | 0  | 11.810559 | 3.880905  | -3.600674 | L |
| H-HC-0.025300  | 0  | 11.139636 | 4.311714  | -1.997104 | L |
| H-HC-0.021300  | 0  | 9.764872  | 4.980529  | -4.211807 | L |
| H-HC-0.021300  | 0  | 8.889497  | 4.234282  | -2.835969 | L |
| H-H1-0.039100  | 0  | 8.287177  | 2.733741  | -4.528511 | L |
| H-H1-0.039100  | 0  | 9.835034  | 2.928913  | -5.395756 | L |
| N-N--0.254800  | 0  | 10.957805 | 2.100657  | -0.147723 | L |
| C-CT--0.026600 | -1 | 10.402018 | 2.100658  | 1.198811  | L |
| C-C-0.589600   | 0  | 9.352417  | 3.190035  | 1.420247  | L |
| O-O--0.574800  | 0  | 9.615506  | 4.366604  | 1.182444  | L |
| C-CT--0.007000 | 0  | 11.600369 | 2.291036  | 2.139535  | L |
| C-CT-0.018900  | 0  | 12.788973 | 1.799442  | 1.316955  | L |
| C-CT-0.019200  | 0  | 12.407261 | 2.206207  | -0.103406 | L |
| H-H1-0.064100  | 0  | 9.958769  | 1.121717  | 1.386822  | L |

|                |    |           |           |           |            |
|----------------|----|-----------|-----------|-----------|------------|
| H-HC-0.025300  | 0  | 11.482280 | 1.717426  | 3.059396  | L          |
| H-HC-0.025300  | 0  | 11.742259 | 3.348612  | 2.369645  | L          |
| H-HC-0.021300  | 0  | 12.854274 | 0.711839  | 1.379527  | L          |
| H-HC-0.021300  | 0  | 13.723703 | 2.262390  | 1.634165  | L          |
| H-H1-0.039100  | 0  | 12.703064 | 3.239947  | -0.287304 | L          |
| H-H1-0.039100  | 0  | 12.885663 | 1.536181  | -0.818636 | L          |
| N-N--0.4157    | 0  | 8.184257  | 2.772811  | 1.897913  | L          |
| C-CT-0.0188    | -1 | 7.028198  | 3.604402  | 2.186093  | L H-HC 334 |
| C-C-0.5973     | 0  | 6.169081  | 3.022564  | 3.305708  | L          |
| O-O--0.5679    | 0  | 6.191766  | 1.815918  | 3.547195  | L          |
| C-CT--0.515368 | 0  | 6.205578  | 3.710003  | 0.874684  | H          |
| C-CM-0.287903  | 0  | 5.613867  | 2.424805  | 0.378475  | H          |
| N-N2--0.582625 | 0  | 6.250372  | 1.617739  | -0.550599 | H          |
| C-CM--0.036893 | 0  | 4.486079  | 1.713271  | 0.716930  | H          |
| C-CM-0.243454  | 0  | 5.518593  | 0.489223  | -0.731170 | H          |
| N-N2--0.523998 | 0  | 4.443260  | 0.512683  | 0.035541  | H          |
| H-H-0.2719     | 0  | 8.045869  | 1.777214  | 1.995603  | L          |
| H-H1-0.0881    | 0  | 7.362411  | 4.602150  | 2.486260  | L          |
| H-HC-0.162301  | 0  | 6.858979  | 4.158939  | 0.112322  | H          |
| H-HC-0.188340  | 0  | 5.409383  | 4.443879  | 1.049709  | H          |
| H-H-0.339448   | 0  | 7.160800  | 1.816258  | -0.965597 | H          |
| H-H4-0.185957  | 0  | 3.709026  | 1.986482  | 1.415092  | H          |
| H-H5-0.211295  | 0  | 5.799045  | -0.317818 | -1.392573 | H          |
| N-N--0.415700  | 0  | 5.394063  | 3.889696  | 3.944866  | L          |
| C-CT-0.014300  | -1 | 4.561104  | 3.612171  | 5.105733  | L          |
| C-C-0.597300   | 0  | 5.208760  | 2.665863  | 6.127525  | L          |
| O-O--0.567900  | 0  | 4.682819  | 1.616214  | 6.501674  | L          |
| C-CT--0.204100 | 0  | 3.101202  | 3.354992  | 4.708206  | L          |
| C-C-0.713000   | 0  | 2.193920  | 4.228445  | 5.555814  | L          |
| N-N--0.919100  | 0  | 1.636660  | 3.731134  | 6.624736  | L          |
| O-O--0.593100  | 0  | 2.012420  | 5.406936  | 5.305053  | L          |
| H-H-0.271900   | 0  | 5.527828  | 4.875271  | 3.711821  | L          |
| H-H1-0.104800  | 0  | 4.547929  | 4.571467  | 5.628375  | L          |
| H-HC-0.079700  | 0  | 2.857702  | 2.305639  | 4.838542  | L          |
| H-HC-0.079700  | 0  | 2.939285  | 3.625067  | 3.665141  | L          |
| H-H-0.419600   | 0  | 0.992273  | 4.310771  | 7.117387  | L          |
| H-H-0.419600   | 0  | 1.673787  | 2.718545  | 6.741304  | L          |
| N-N--0.4157    | 0  | 6.395727  | 3.097172  | 6.567509  | L          |
| C-CT--0.1490   | -1 | 7.300401  | 2.355564  | 7.424662  | L          |
| H-H-0.2719     | 0  | 6.709648  | 3.968126  | 6.162235  | L          |
| H-H1-0.0976    | 0  | 8.052981  | 3.021020  | 7.847048  | L          |
| H-H1-0.0976    | 0  | 7.789864  | 1.570535  | 6.845095  | L          |
| H-H1-0.0976    | 0  | 6.739824  | 1.879118  | 8.232076  | L          |
| C-CT--0.3662   | -1 | -2.263246 | -2.677393 | 9.552962  | L          |
| C-C-0.5972     | 0  | -2.374783 | -3.780005 | 8.536606  | L          |
| O-O--0.5679    | 0  | -2.895748 | -4.848943 | 8.843855  | L          |
| H-HC-0.1123    | 0  | -1.212396 | -2.437811 | 9.703656  | L          |
| H-HC-0.1123    | 0  | -2.706761 | -3.009046 | 10.489300 | L          |
| H-HC-0.1123    | 0  | -2.789514 | -1.798808 | 9.184462  | L          |
| N-N--0.347900  | 0  | -1.859671 | -3.521831 | 7.337861  | L          |
| C-CT--0.240000 | -1 | -1.759298 | -4.494437 | 6.243412  | L          |
| C-C-0.734100   | 0  | -0.354551 | -4.525833 | 5.653347  | L          |
| O-O--0.589400  | 0  | 0.462267  | -3.643823 | 5.901210  | L          |
| C-CT--0.009400 | 0  | -2.866217 | -4.223034 | 5.206922  | L          |

|                |    |           |           |           |        |     |
|----------------|----|-----------|-----------|-----------|--------|-----|
| C-CT-0.018700  | 0  | -2.671046 | -2.934789 | 4.398633  | L H-HC | 379 |
| C-CT--0.464524 | 0  | -3.832131 | -2.743677 | 3.417111  | H      |     |
| C-CT--0.195159 | 0  | -3.760845 | -1.444453 | 2.624449  | H      |     |
| N-N3--0.748751 | 0  | -2.649623 | -1.399642 | 1.630074  | H      |     |
| H-H-0.274700   | 0  | -1.479548 | -2.589300 | 7.188487  | L      |     |
| H-H1-0.142600  | 0  | -1.936066 | -5.488551 | 6.654355  | L      |     |
| H-HC-0.036200  | 0  | -3.825139 | -4.175347 | 5.725930  | L      |     |
| H-HC-0.036200  | 0  | -2.917654 | -5.053998 | 4.510497  | L      |     |
| H-HC-0.010300  | 0  | -1.731889 | -2.980583 | 3.846281  | L      |     |
| H-HC-0.010300  | 0  | -2.649728 | -2.088964 | 5.078185  | L      |     |
| H-HC-0.173903  | 0  | -4.765598 | -2.744015 | 3.988081  | H      |     |
| H-HC-0.148535  | 0  | -3.866347 | -3.605390 | 2.734080  | H      |     |
| H-HP-0.236066  | 0  | -3.653221 | -0.559935 | 3.253193  | H      |     |
| H-HP-0.172509  | 0  | -4.679731 | -1.321801 | 2.037430  | H      |     |
| H-H-0.437293   | 0  | -2.627889 | -0.325393 | 1.149695  | H      |     |
| H-H-0.366736   | 0  | -2.843596 | -2.095229 | 0.898737  | H      |     |
| H-H-0.419451   | 0  | -1.711401 | -1.575841 | 2.024270  | H      |     |
| N-N--0.415700  | 0  | -0.056668 | -5.568569 | 4.891491  | L      |     |
| C-CT--0.025200 | -1 | 1.260177  | -5.780304 | 4.299243  | L      |     |
| C-C-0.597300   | 0  | 1.135158  | -6.505032 | 2.957983  | L      |     |
| O-O--0.567900  | 0  | 1.715866  | -7.565978 | 2.737238  | L      |     |
| H-H-0.271900   | 0  | -0.799819 | -6.225180 | 4.671937  | L      |     |
| H-H1-0.069800  | 0  | 1.873196  | -6.381900 | 4.970362  | L      |     |
| H-H1-0.069800  | 0  | 1.759390  | -4.826340 | 4.125950  | L      |     |
| N-N--0.415700  | 0  | 0.324012  | -5.920982 | 2.080021  | L      |     |
| C-CT--0.025200 | -1 | -0.249247 | -6.526173 | 0.880940  | L      |     |
| C-C-0.597300   | 0  | -1.389751 | -5.648514 | 0.434234  | L      |     |
| O-O--0.567900  | 0  | -2.294422 | -5.416236 | 1.228648  | L      |     |
| H-H-0.271900   | 0  | -0.109460 | -5.063586 | 2.396976  | L      |     |
| H-H1-0.069800  | 0  | -0.630832 | -7.519907 | 1.115221  | L      |     |
| H-H1-0.069800  | 0  | 0.512149  | -6.593922 | 0.103413  | L      |     |
| N-N--0.4157    | 0  | -1.324615 | -5.167872 | -0.807175 | L      |     |
| C-CT--0.0014   | -1 | -2.166711 | -4.099703 | -1.346339 | L      |     |
| C-C-0.5973     | 0  | -3.628199 | -4.171037 | -0.890465 | L      |     |
| O-O--0.5679    | 0  | -4.180832 | -3.210890 | -0.365326 | L      |     |
| C-CT--0.0152   | 0  | -2.076844 | -4.108104 | -2.887203 | L      |     |
| C-CA--0.0011   | 0  | -0.688457 | -4.283429 | -3.479491 | L      |     |
| C-CA--0.1906   | 0  | 0.331250  | -3.359876 | -3.184131 | L      |     |
| C-CA--0.1906   | 0  | -0.423058 | -5.364501 | -4.344037 | L      |     |
| C-CA--0.2341   | 0  | 1.614327  | -3.516105 | -3.741266 | L      |     |
| C-CA--0.2341   | 0  | 0.858114  | -5.525194 | -4.905885 | L      |     |
| C-C-0.3226     | 0  | 1.880932  | -4.599310 | -4.603184 | L      |     |
| O-OH--0.5579   | 0  | 3.112098  | -4.754198 | -5.158953 | L      |     |
| H-H-0.2719     | 0  | -0.486559 | -5.358542 | -1.337631 | L      |     |
| H-H1-0.0876    | 0  | -1.763444 | -3.151540 | -0.989473 | L      |     |
| H-HC-0.0295    | 0  | -2.481928 | -3.173018 | -3.267345 | L      |     |
| H-HC-0.0295    | 0  | -2.714600 | -4.904464 | -3.271219 | L      |     |
| H-HA-0.1699    | 0  | 0.132869  | -2.518728 | -2.531918 | L      |     |
| H-HA-0.1699    | 0  | -1.211619 | -6.058852 | -4.594568 | L      |     |
| H-HA-0.1656    | 0  | 2.390965  | -2.801733 | -3.508590 | L      |     |
| H-HA-0.1656    | 0  | 1.052752  | -6.346448 | -5.575709 | L      |     |
| H-HO-0.3992    | 0  | 3.112527  | -5.467804 | -5.794444 | L      |     |
| N-N--0.415700  | 0  | -4.235750 | -5.347332 | -1.060718 | L      |     |
| C-CT--0.024900 | -1 | -5.572101 | -5.628514 | -0.557225 | L      |     |

|                |    |            |            |           |   |
|----------------|----|------------|------------|-----------|---|
| C-C-0.597300   | 0  | -5.701784  | -5.550330  | 0.962285  | L |
| O-O--0.567900  | 0  | -5.091226  | -6.327173  | 1.706374  | L |
| C-CT-0.211700  | 0  | -6.044650  | -7.018694  | -0.985469 | L |
| O-OH--0.654600 | -1 | -7.297186  | -7.323082  | -0.386503 | L |
| H-H-0.271900   | 0  | -3.671283  | -6.084914  | -1.441416 | L |
| H-H1-0.084300  | 0  | -6.254158  | -4.900721  | -0.997268 | L |
| H-H1-0.035200  | 0  | -5.310964  | -7.760413  | -0.667584 | L |
| H-H1-0.035200  | 0  | -6.134068  | -7.053065  | -2.071270 | L |
| H-HO-0.427500  | -1 | -7.556908  | -8.196635  | -0.689398 | L |
| N-N--0.415700  | 0  | -6.665053  | -4.736037  | 1.386499  | L |
| C-CT-0.033700  | -1 | -7.169387  | -4.630200  | 2.744217  | L |
| C-C-0.597300   | 0  | -7.547958  | -5.946425  | 3.428139  | L |
| O-O--0.567900  | 0  | -7.529661  | -6.029659  | 4.654704  | L |
| C-CT--0.182500 | 0  | -8.345789  | -3.653645  | 2.733419  | L |
| H-H-0.271900   | 0  | -7.104225  | -4.142052  | 0.689487  | L |
| H-H1-0.082300  | 0  | -6.380806  | -4.189332  | 3.352396  | L |
| H-HC-0.060300  | 0  | -8.037968  | -2.694791  | 2.311958  | L |
| H-HC-0.060300  | 0  | -8.695211  | -3.499736  | 3.749637  | L |
| H-HC-0.060300  | 0  | -9.161888  | -4.067287  | 2.146863  | L |
| N-N--0.415700  | 0  | -7.906054  | -6.967225  | 2.648785  | L |
| C-CT--0.025200 | -1 | -8.305029  | -8.270227  | 3.165890  | L |
| C-C-0.597300   | 0  | -7.338823  | -9.410343  | 2.876120  | L |
| O-O--0.567900  | 0  | -7.738703  | -10.572276 | 2.919737  | L |
| H-H-0.271900   | 0  | -7.857333  | -6.814631  | 1.647631  | L |
| H-H1-0.069800  | 0  | -9.265789  | -8.533537  | 2.724803  | L |
| H-H1-0.069800  | 0  | -8.446443  | -8.226541  | 4.246021  | L |
| N-N--0.415700  | 0  | -6.069412  | -9.102471  | 2.615891  | L |
| C-CT--0.024900 | -1 | -4.993284  | -10.090984 | 2.655924  | L |
| C-C-0.597300   | 0  | -4.307905  | -10.045594 | 4.015836  | L |
| O-O--0.567900  | 0  | -3.996035  | -8.967684  | 4.531379  | L |
| C-CT-0.211700  | 0  | -3.986474  | -9.800011  | 1.537551  | L |
| O-OH--0.654600 | -1 | -3.115833  | -10.903898 | 1.343914  | L |
| H-H-0.271900   | 0  | -5.820033  | -8.117175  | 2.600386  | L |
| H-H1-0.084300  | 0  | -5.400131  | -11.088414 | 2.489102  | L |
| H-H1-0.035200  | 0  | -3.411241  | -8.903940  | 1.776345  | L |
| H-H1-0.035200  | 0  | -4.533226  | -9.625394  | 0.610057  | L |
| H-HO-0.427500  | -1 | -2.574192  | -10.721250 | 0.572606  | L |
| N-N--0.4157    | 0  | -4.103945  | -11.220894 | 4.609886  | L |
| C-CT--0.1490   | -1 | -3.562767  | -11.362901 | 5.950231  | L |
| H-H-0.2719     | 0  | -4.378495  | -12.041631 | 4.094112  | L |
| H-H1-0.0976    | 0  | -3.343470  | -12.409353 | 6.161869  | L |
| H-H1-0.0976    | 0  | -4.282329  | -10.989314 | 6.682109  | L |
| H-H1-0.0976    | 0  | -2.644221  | -10.778612 | 6.044480  | L |
| C-CT--0.3662   | -1 | -12.124293 | 5.119942   | -0.687129 | L |
| C-C-0.5972     | 0  | -10.695767 | 5.307170   | -0.248248 | L |
| O-O--0.5679    | 0  | -10.384254 | 5.048945   | 0.908870  | L |
| H-HC-0.1123    | 0  | -12.516455 | 6.068257   | -1.047655 | L |
| H-HC-0.1123    | 0  | -12.711240 | 4.778811   | 0.163978  | L |
| H-HC-0.1123    | 0  | -12.157014 | 4.369238   | -1.474590 | L |
| N-N--0.415700  | 0  | -9.844257  | 5.745434   | -1.171949 | L |
| C-CT--0.025200 | -1 | -8.410246  | 5.899360   | -0.941365 | L |
| C-C-0.597300   | 0  | -7.588440  | 5.835430   | -2.204165 | L |
| O-O--0.567900  | 0  | -8.080315  | 6.200571   | -3.278886 | L |
| H-H-0.271900   | 0  | -10.153092 | 5.905452   | -2.118266 | L |



|                |    |           |           |           |   |      |     |
|----------------|----|-----------|-----------|-----------|---|------|-----|
| H-H1-0.069800  | 0  | -8.097635 | 5.080934  | -0.302222 | L |      |     |
| H-H1-0.069800  | 0  | -8.206743 | 6.841785  | -0.434947 | L |      |     |
| N-N--0.415700  | 0  | -6.346337 | 5.378504  | -2.037507 | L | H-H1 | 489 |
| C-CT--0.530209 | -1 | -5.325934 | 5.304600  | -3.080857 | H |      |     |
| C-C-0.568093   | 0  | -4.665190 | 3.937377  | -2.986784 | H |      |     |
| O-O--0.528105  | 0  | -4.730230 | 3.259709  | -1.960302 | H |      |     |
| C-CT-0.298500  | 0  | -4.332800 | 6.485122  | -2.975430 | L | H-H1 | 489 |
| C-CT--0.319200 | 0  | -5.031545 | 7.815471  | -3.266578 | L |      |     |
| C-CT--0.319200 | 0  | -3.652483 | 6.560592  | -1.606546 | L |      |     |
| H-H-0.271900   | 0  | -6.069787 | 5.036858  | -1.119265 | L |      |     |
| H-H1-0.184096  | 0  | -5.833817 | 5.406315  | -4.047569 | H |      |     |
| H-HC--0.029700 | 0  | -3.559109 | 6.356477  | -3.730939 | L |      |     |
| H-HC-0.079100  | 0  | -5.756034 | 8.035423  | -2.484256 | L |      |     |
| H-HC-0.079100  | 0  | -5.542692 | 7.754490  | -4.226034 | L |      |     |
| H-HC-0.079100  | 0  | -4.289251 | 8.611648  | -3.303078 | L |      |     |
| H-HC-0.079100  | 0  | -4.387638 | 6.694936  | -0.815025 | L |      |     |
| H-HC-0.079100  | 0  | -2.950422 | 7.391123  | -1.587855 | L |      |     |
| H-HC-0.079100  | 0  | -3.104834 | 5.635326  | -1.417834 | L |      |     |
| N-N--0.610103  | 0  | -3.984711 | 3.531183  | -4.089644 | H |      |     |
| C-CT--0.314060 | -1 | -4.215694 | 3.996668  | -5.449806 | H |      |     |
| C-C-0.597300   | 0  | -5.329588 | 3.181576  | -6.093908 | L | H-H1 | 505 |
| O-O--0.567900  | 0  | -5.455454 | 1.976006  | -5.879518 | L |      |     |
| C-CT--0.110200 | 0  | -2.906988 | 3.855588  | -6.264722 | L | H-H1 | 505 |
| C-CT-0.353100  | 0  | -1.798100 | 4.879537  | -5.920821 | L |      |     |
| C-CT--0.412100 | 0  | -1.020118 | 4.579361  | -4.637132 | L |      |     |
| C-CT--0.412100 | 0  | -0.773760 | 4.916407  | -7.060227 | L |      |     |
| H-H-0.398207   | 0  | -3.590075 | 2.601291  | -4.010219 | H |      |     |
| H-H1-0.165130  | 0  | -4.497946 | 5.047466  | -5.453696 | H |      |     |
| H-HC-0.045700  | 0  | -3.165521 | 3.986866  | -7.315449 | L |      |     |
| H-HC-0.045700  | 0  | -2.512032 | 2.845765  | -6.150256 | L |      |     |
| H-HC--0.036100 | 0  | -2.242440 | 5.872424  | -5.843736 | L |      |     |
| H-HC-0.100000  | 0  | -0.617770 | 3.568198  | -4.666352 | L |      |     |
| H-HC-0.100000  | 0  | -1.681609 | 4.650130  | -3.773576 | L |      |     |
| H-HC-0.100000  | 0  | -0.213263 | 5.296857  | -4.501278 | L |      |     |
| H-HC-0.100000  | 0  | -0.302256 | 3.939772  | -7.160167 | L |      |     |
| H-HC-0.100000  | 0  | -0.010979 | 5.662887  | -6.839728 | L |      |     |
| H-HC-0.100000  | 0  | -1.267260 | 5.183107  | -7.992953 | L |      |     |
| N-N--0.415700  | 0  | -6.118082 | 3.829148  | -6.944247 | L |      |     |
| C-CT--0.038900 | -1 | -7.307720 | 3.225719  | -7.556632 | L |      |     |
| C-C-0.597300   | 0  | -7.065906 | 1.886016  | -8.242066 | L |      |     |
| O-O--0.567900  | 0  | -7.948454 | 1.030870  | -8.280889 | L |      |     |
| C-CT-0.365400  | -1 | -7.941683 | 4.146647  | -8.623378 | L |      |     |
| O-OH--0.676100 | -1 | -7.876479 | 5.505881  | -8.182143 | L |      |     |
| C-CT--0.243800 | 0  | -9.420992 | 3.860009  | -8.881154 | L |      |     |
| H-H-0.271900   | 0  | -5.998944 | 4.827803  | -7.029177 | L |      |     |
| H-H1-0.100700  | 0  | -8.046901 | 3.090155  | -6.773998 | L |      |     |
| H-H1-0.004300  | 0  | -7.386544 | 4.064339  | -9.558821 | L |      |     |
| H-HC-0.064200  | 0  | -9.539749 | 2.854540  | -9.284489 | L |      |     |
| H-HC-0.064200  | 0  | -9.812816 | 4.571638  | -9.607661 | L |      |     |
| H-HC-0.064200  | 0  | -9.984326 | 3.937451  | -7.950422 | L |      |     |
| H-HO-0.410200  | -1 | -8.773753 | 5.843781  | -8.148951 | L |      |     |
| N-N--0.415700  | 0  | -5.891588 | 1.746613  | -8.853858 | L |      |     |
| C-CT--0.025200 | -1 | -5.506628 | 0.581017  | -9.635857 | L |      |     |
| C-C-0.597300   | 0  | -4.625579 | -0.423147 | -8.924781 | L |      |     |

|                |    |            |           |            |   |      |     |
|----------------|----|------------|-----------|------------|---|------|-----|
| O-O--0.567900  | 0  | -4.170666  | -1.360325 | -9.581695  | L |      |     |
| H-H-0.271900   | 0  | -5.204298  | 2.461897  | -8.669805  | L |      |     |
| H-H1-0.069800  | 0  | -4.965533  | 0.917117  | -10.519106 | L |      |     |
| H-H1-0.069800  | 0  | -6.395960  | 0.050745  | -9.976378  | L |      |     |
| N-N--0.415700  | 0  | -4.376879  | -0.213828 | -7.625694  | L | H-H1 | 545 |
| C-CT--0.539097 | -1 | -3.469802  | -1.021820 | -6.822436  | H |      |     |
| C-C-0.572106   | 0  | -4.213549  | -1.486888 | -5.568863  | H |      |     |
| O-O--0.533001  | 0  | -4.894880  | -2.507637 | -5.632034  | H |      |     |
| C-CT-0.130300  | 0  | -2.075484  | -0.365213 | -6.683737  | L | H-H1 | 545 |
| C-CT--0.043000 | 0  | -1.458459  | 0.015805  | -8.050692  | L |      |     |
| C-CT--0.320400 | 0  | -1.179779  | -1.384175 | -5.956951  | L |      |     |
| C-CT--0.066000 | 0  | -0.091414  | 0.706757  | -7.960760  | L |      |     |
| H-H-0.271900   | 0  | -4.816233  | 0.575906  | -7.160651  | L |      |     |
| H-H1-0.180646  | 0  | -3.311430  | -1.952159 | -7.380742  | H |      |     |
| H-HC-0.018700  | 0  | -2.167468  | 0.541572  | -6.097323  | L |      |     |
| H-HC-0.023600  | 0  | -2.124225  | 0.713959  | -8.556418  | L |      |     |
| H-HC-0.023600  | 0  | -1.366478  | -0.877272 | -8.670036  | L |      |     |
| H-HC-0.088200  | 0  | -1.110315  | -2.304223 | -6.535630  | L |      |     |
| H-HC-0.088200  | 0  | -1.592615  | -1.614447 | -4.976388  | L |      |     |
| H-HC-0.088200  | 0  | -0.181972  | -0.985596 | -5.799222  | L |      |     |
| H-HC-0.018600  | 0  | -0.150974  | 1.554702  | -7.279344  | L |      |     |
| H-HC-0.018600  | 0  | 0.195896   | 1.065205  | -8.949234  | L |      |     |
| H-HC-0.018600  | 0  | 0.668626   | 0.008989  | -7.612265  | L |      |     |
| N-N--0.611145  | 0  | -4.111858  | -0.711899 | -4.463810  | H |      |     |
| C-CT--0.109296 | -1 | -4.637005  | -1.101950 | -3.160734  | H |      |     |
| C-C-0.597300   | 0  | -6.165843  | -1.105283 | -3.127717  | L | H-H1 | 564 |
| O-O--0.567900  | 0  | -6.798609  | -2.033074 | -2.609549  | L |      |     |
| C-CT--0.388038 | 0  | -3.999193  | -0.247648 | -2.076252  | H |      |     |
| H-H-0.369964   | 0  | -3.530233  | 0.118231  | -4.465947  | H |      |     |
| H-H1-0.178541  | 0  | -4.378552  | -2.148766 | -2.975643  | H |      |     |
| H-H1-0.157964  | 0  | -4.418471  | -0.524828 | -1.104787  | H |      |     |
| H-H1-0.179833  | 0  | -4.158512  | 0.827179  | -2.198115  | H |      |     |
| H-HS-0.319500  | 0  | -1.891429  | 2.012492  | -0.610596  | H |      |     |
| N-N--0.415700  | 0  | -6.756588  | -0.118162 | -3.790678  | L |      |     |
| C-CT--0.087500 | -1 | -8.190129  | -0.056356 | -4.064392  | L |      |     |
| C-C-0.597300   | 0  | -8.667189  | -1.216773 | -4.923497  | L |      |     |
| O-O--0.567900  | 0  | -9.608952  | -1.913890 | -4.546056  | L |      |     |
| C-CT-0.298500  | 0  | -8.573258  | 1.300257  | -4.674552  | L |      |     |
| C-CT--0.319200 | 0  | -10.085317 | 1.429373  | -4.905119  | L |      |     |
| C-CT--0.319200 | 0  | -8.143663  | 2.485680  | -3.795827  | L |      |     |
| H-H-0.271900   | 0  | -6.113851  | 0.558732  | -4.193317  | L |      |     |
| H-H1-0.096900  | 0  | -8.710177  | -0.141793 | -3.113066  | L |      |     |
| H-HC--0.029700 | 0  | -8.073778  | 1.374495  | -5.631908  | L |      |     |
| H-HC-0.079100  | 0  | -10.616136 | 1.291440  | -3.962865  | L |      |     |
| H-HC-0.079100  | 0  | -10.421034 | 0.681003  | -5.622708  | L |      |     |
| H-HC-0.079100  | 0  | -10.312630 | 2.415808  | -5.308167  | L |      |     |
| H-HC-0.079100  | 0  | -8.619614  | 2.431766  | -2.818664  | L |      |     |
| H-HC-0.079100  | 0  | -8.406972  | 3.428885  | -4.273585  | L |      |     |
| H-HC-0.079100  | 0  | -7.062623  | 2.482236  | -3.651718  | L |      |     |
| N-N--0.415700  | 0  | -8.034099  | -1.431613 | -6.075336  | L |      |     |
| C-CT--0.025200 | -1 | -8.405124  | -2.487623 | -7.015012  | L |      |     |
| C-C-0.597300   | 0  | -8.316919  | -3.889046 | -6.423718  | L |      |     |
| O-O--0.567900  | 0  | -9.213922  | -4.705645 | -6.623492  | L |      |     |
| H-H-0.271900   | 0  | -7.239939  | -0.839575 | -6.283526  | L |      |     |

|                |    |            |           |           |   |
|----------------|----|------------|-----------|-----------|---|
| H-H1-0.069800  | 0  | -7.743671  | -2.440082 | -7.879792 | L |
| H-H1-0.069800  | 0  | -9.427742  | -2.321427 | -7.353154 | L |
| N-N--0.415700  | 0  | -7.237961  | -4.162717 | -5.692350 | L |
| C-CT--0.025200 | -1 | -7.020772  | -5.424046 | -4.995248 | L |
| C-C-0.597300   | 0  | -7.956059  | -5.674943 | -3.823730 | L |
| O-O--0.567900  | 0  | -8.299518  | -6.824015 | -3.550877 | L |
| H-H-0.271900   | 0  | -6.520829  | -3.442107 | -5.623475 | L |
| H-H1-0.069800  | 0  | -5.998381  | -5.442247 | -4.619282 | L |
| H-H1-0.069800  | 0  | -7.139254  | -6.244768 | -5.702780 | L |
| N-N--0.415700  | 0  | -8.337623  | -4.613708 | -3.116394 | L |
| C-CT--0.038900 | -1 | -9.390854  | -4.664892 | -2.100005 | L |
| C-C-0.597300   | 0  | -10.760773 | -4.958450 | -2.702755 | L |
| O-O--0.567900  | 0  | -11.505651 | -5.791932 | -2.186408 | L |
| C-CT-0.365400  | 0  | -9.427590  | -3.360540 | -1.289267 | L |
| O-OH--0.676100 | 0  | -8.194972  | -3.198740 | -0.626378 | L |
| C-CT--0.243800 | 0  | -10.519781 | -3.363734 | -0.219861 | L |
| H-H-0.271900   | 0  | -7.941717  | -3.712082 | -3.359938 | L |
| H-H1-0.100700  | 0  | -9.166000  | -5.477394 | -1.409215 | L |
| H-H1-0.004300  | 0  | -9.586467  | -2.510481 | -1.952906 | L |
| H-HC-0.064200  | 0  | -11.497392 | -3.256030 | -0.688337 | L |
| H-HC-0.064200  | 0  | -10.365790 | -2.530753 | 0.465649  | L |
| H-HC-0.064200  | 0  | -10.491600 | -4.300609 | 0.334892  | L |
| H-HO-0.410200  | 0  | -7.603690  | -2.728568 | -1.250225 | L |
| N-N--0.4157    | 0  | -11.108731 | -4.254260 | -3.780886 | L |
| C-CT--0.1490   | -1 | -12.341156 | -4.446560 | -4.517117 | L |
| H-H-0.2719     | 0  | -10.440145 | -3.572710 | -4.129496 | L |
| H-H1-0.0976    | 0  | -12.414026 | -3.698056 | -5.307052 | L |
| H-H1-0.0976    | 0  | -13.193434 | -4.354752 | -3.842512 | L |
| H-H1-0.0976    | 0  | -12.341695 | -5.441876 | -4.964583 | L |
| N-N2--0.511415 | 0  | 2.026742   | -0.084289 | -1.739357 | H |
| C-CA-0.057801  | 0  | 0.709052   | 0.121927  | -1.764682 | H |
| C-CA-0.063496  | 0  | 0.035892   | 0.555546  | -2.912182 | H |
| C-CA--0.109122 | 0  | 0.785768   | 0.887290  | -4.039272 | H |
| C-CA--0.164490 | 0  | 2.160629   | 0.691394  | -4.006461 | H |
| C-CA-0.098392  | 0  | 2.734284   | 0.172142  | -2.850875 | H |
| C-C-0.541263   | 0  | -1.447888  | 0.599337  | -2.994896 | H |
| O-O--0.574884  | 0  | -2.037132  | 1.279380  | -3.823377 | H |
| H-H4-0.220889  | 0  | 0.178604   | -0.050633 | -0.835991 | H |
| H-HA-0.160434  | 0  | 0.281294   | 1.270329  | -4.918944 | H |
| H-HA-0.142191  | 0  | 2.783914   | 0.931493  | -4.860544 | H |
| H-H4-0.174502  | 0  | 3.794880   | -0.044617 | -2.800950 | H |
| H-H-0.353801   | 0  | -0.827509  | 3.128869  | -0.735058 | H |
| Zn-ZN-0.974537 | 0  | 2.867743   | -1.109148 | 0.027207  | H |
| O-OW--0.834000 | 0  | -2.151854  | -7.214882 | 3.529234  | L |
| H-HW-0.417000  | 0  | -2.578451  | -6.628256 | 2.884524  | L |
| H-HW-0.417000  | 0  | -2.885102  | -7.748165 | 3.876875  | L |
| O-OW--0.783903 | 0  | 1.295728   | -2.544789 | -0.132150 | H |
| H-HW-0.401253  | 0  | 0.879913   | -2.422104 | 0.760948  | H |
| H-HW-0.424111  | 0  | 1.889648   | -3.337120 | -0.156527 | H |
| O-OW--0.834000 | 0  | -3.713306  | -8.395916 | 7.275157  | L |
| H-HW-0.417000  | 0  | -3.761263  | -7.450361 | 7.437768  | L |
| H-HW-0.417000  | 0  | -3.836756  | -8.475638 | 6.317007  | L |
| O-OW--0.834000 | 0  | 7.190253   | -0.018876 | 1.832521  | L |
| H-HW-0.417000  | 0  | 6.884920   | 0.393468  | 2.660892  | L |

|                |   |           |           |           |   |
|----------------|---|-----------|-----------|-----------|---|
| H-HW-0.417000  | 0 | 6.403982  | 0.078627  | 1.272240  | L |
| O-OW--0.834000 | 0 | 7.037736  | -4.940590 | 4.802562  | L |
| H-HW-0.417000  | 0 | 6.087495  | -4.993455 | 5.032810  | L |
| H-HW-0.417000  | 0 | 7.235816  | -5.821987 | 4.483899  | L |
| O-OW--0.834000 | 0 | 8.645045  | -0.947844 | -0.217515 | L |
| H-HW-0.417000  | 0 | 8.181627  | -0.569385 | 0.557191  | L |
| H-HW-0.417000  | 0 | 8.854766  | -0.161901 | -0.742562 | L |
| O-OW--0.834000 | 0 | 12.656638 | -1.110824 | -1.973116 | L |
| H-HW-0.417000  | 0 | 11.806299 | -0.859927 | -2.373301 | L |
| H-HW-0.417000  | 0 | 12.657374 | -2.074883 | -2.076199 | L |
| O-OW--0.834000 | 0 | 8.281857  | -3.315793 | 1.021305  | L |
| H-HW-0.417000  | 0 | 8.497381  | -2.547424 | 0.452550  | L |
| H-HW-0.417000  | 0 | 7.549457  | -2.977574 | 1.546828  | L |
| O-OW--0.834000 | 0 | 4.348194  | -4.887014 | 5.203913  | L |
| H-HW-0.417000  | 0 | 4.080691  | -4.496393 | 6.058853  | L |
| H-HW-0.417000  | 0 | 4.031940  | -4.231525 | 4.571749  | L |
| S-SH--0.326142 | 0 | -2.205117 | -0.603117 | -1.934323 | H |
| O-OW--0.834000 | 0 | -1.371587 | 2.523892  | -1.267273 | H |

**TS3**

|                |    |            |           |           |           |
|----------------|----|------------|-----------|-----------|-----------|
| C-CT--0.366200 | -1 | -10.306119 | 3.933744  | 4.023850  | L         |
| C-C-0.597200   | 0  | -8.977936  | 3.280913  | 3.775973  | L         |
| O-O--0.567900  | 0  | -8.400042  | 2.714402  | 4.696946  | L         |
| H-HC-0.112300  | 0  | -11.051502 | 3.473234  | 3.378533  | L         |
| H-HC-0.112300  | 0  | -10.225664 | 4.995115  | 3.795670  | L         |
| H-HC-0.112300  | 0  | -10.581807 | 3.797050  | 5.067062  | L         |
| N-N--0.415700  | 0  | -8.520942  | 3.365256  | 2.533192  | L         |
| C-CT--0.059700 | -1 | -7.339508  | 2.662939  | 2.025558  | L         |
| C-C-0.597300   | 0  | -6.196625  | 3.651146  | 1.848466  | L         |
| O-O--0.567900  | 0  | -6.359044  | 4.661982  | 1.170209  | L         |
| C-CT-0.130300  | 0  | -7.666195  | 1.908987  | 0.711860  | L         |
| C-CT--0.043000 | 0  | -8.869232  | 0.949008  | 0.898282  | L         |
| C-CT--0.320400 | 0  | -6.437089  | 1.112218  | 0.237845  | L         |
| C-CT--0.066000 | 0  | -9.373006  | 0.310917  | -0.400792 | L         |
| H-H-0.271900   | 0  | -9.055976  | 3.928289  | 1.880607  | L         |
| H-H1-0.086900  | 0  | -7.028142  | 1.918347  | 2.758021  | L         |
| H-HC-0.018700  | 0  | -7.921119  | 2.642548  | -0.055225 | L         |
| H-HC-0.023600  | 0  | -9.713356  | 1.494423  | 1.318279  | L         |
| H-HC-0.023600  | 0  | -8.598904  | 0.158418  | 1.599468  | L         |
| H-HC-0.088200  | 0  | -6.166505  | 0.348064  | 0.966692  | L         |
| H-HC-0.088200  | 0  | -5.582296  | 1.773827  | 0.090170  | L         |
| H-HC-0.088200  | 0  | -6.633327  | 0.644578  | -0.724896 | L         |
| H-HC-0.018600  | 0  | -9.588559  | 1.085927  | -1.135007 | L         |
| H-HC-0.018600  | 0  | -10.289676 | -0.241347 | -0.197448 | L         |
| H-HC-0.018600  | 0  | -8.630755  | -0.380234 | -0.796847 | L         |
| N-N--0.516300  | 0  | -5.080286  | 3.365030  | 2.513020  | L         |
| C-CT-0.038100  | -1 | -3.771439  | 3.991601  | 2.391174  | L H-HC 30 |
| C-C-0.536600   | 0  | -3.679602  | 5.513782  | 2.164892  | L         |
| O-O--0.581900  | 0  | -2.678800  | 6.038006  | 1.672647  | L         |
| C-CT--0.547145 | 0  | -3.004066  | 3.206507  | 1.314067  | H         |
| C-C-0.532653   | 0  | -2.510152  | 1.856727  | 1.778474  | H         |
| O-O2--0.588507 | 0  | -2.670320  | 1.441328  | 2.924015  | H         |
| O-O2--0.625559 | 0  | -1.853678  | 1.150879  | 0.878342  | H         |
| H-H-0.293600   | 0  | -5.052899  | 2.474433  | 2.993656  | L         |

|                |    |           |           |           |   |
|----------------|----|-----------|-----------|-----------|---|
| H-H1-0.088000  | 0  | -3.248610 | 3.830757  | 3.334413  | L |
| H-HC-0.128435  | 0  | -2.105744 | 3.774066  | 1.026382  | H |
| H-HC-0.183556  | 0  | -3.591387 | 3.137076  | 0.391554  | H |
| N-N--0.415700  | 0  | -4.661684 | 6.267449  | 2.638878  | L |
| C-CT--0.025200 | -1 | -4.642367 | 7.711161  | 2.518081  | L |
| C-C-0.597300   | 0  | -3.748116 | 8.353949  | 3.564539  | L |
| O-O--0.567900  | 0  | -4.225956 | 9.010364  | 4.491208  | L |
| H-H-0.271900   | 0  | -5.498284 | 5.766012  | 2.895186  | L |
| H-H1-0.069800  | 0  | -5.654423 | 8.092282  | 2.645658  | L |
| H-H1-0.069800  | 0  | -4.292007 | 7.997135  | 1.525057  | L |
| N-N--0.415700  | 0  | -2.444040 | 8.150724  | 3.413477  | L |
| C-CT--0.038900 | -1 | -1.418943 | 8.566832  | 4.360266  | L |
| C-C-0.597300   | 0  | -0.521482 | 9.666808  | 3.780034  | L |
| O-O--0.567900  | 0  | -0.640386 | 10.068258 | 2.620974  | L |
| C-CT-0.365400  | 0  | -0.554782 | 7.398067  | 4.879680  | L |
| O-OH--0.676100 | 0  | 0.573978  | 7.211607  | 4.063686  | L |
| C-CT--0.243800 | 0  | -1.282882 | 6.065982  | 5.029643  | L |
| H-H-0.271900   | 0  | -2.178703 | 7.555017  | 2.631204  | L |
| H-H1-0.100700  | 0  | -1.916840 | 8.993749  | 5.229036  | L |
| H-H1-0.004300  | 0  | -0.189403 | 7.682071  | 5.867144  | L |
| H-HC-0.064200  | 0  | -2.202571 | 6.209156  | 5.595134  | L |
| H-HC-0.064200  | 0  | -0.641801 | 5.365157  | 5.558145  | L |
| H-HC-0.064200  | 0  | -1.514345 | 5.650083  | 4.049477  | L |
| H-HO-0.410200  | 0  | 1.092400  | 6.463884  | 4.432183  | L |
| N-N--0.415700  | 0  | 0.415125  | 10.152828 | 4.598792  | L |
| C-CT--0.025200 | -1 | 1.452444  | 11.089973 | 4.178267  | L |
| C-C-0.597300   | 0  | 2.344155  | 10.599547 | 3.046035  | L |
| O-O--0.567900  | 0  | 2.664505  | 11.370444 | 2.146426  | L |
| H-H-0.271900   | 0  | 0.490301  | 9.735074  | 5.510743  | L |
| H-H1-0.069800  | 0  | 2.093705  | 11.322913 | 5.027181  | L |
| H-H1-0.069800  | 0  | 0.977923  | 12.014097 | 3.847331  | L |
| N-N--0.516300  | 0  | 2.749549  | 9.333728  | 3.108121  | L |
| C-CT-0.038100  | -1 | 3.655832  | 8.732414  | 2.131248  | L |
| C-C-0.536600   | 0  | 3.022424  | 8.435642  | 0.785885  | L |
| O-O--0.581900  | 0  | 3.757568  | 8.157017  | -0.154075 | L |
| C-CT--0.030300 | 0  | 4.237594  | 7.418318  | 2.683081  | L |
| C-C-0.799400   | -1 | 5.584451  | 7.615870  | 3.359005  | L |
| O-O2--0.801400 | -1 | 6.166313  | 8.719304  | 3.278291  | L |
| O-O2--0.801400 | -1 | 6.042786  | 6.661383  | 4.019386  | L |
| H-H-0.293600   | 0  | 2.388763  | 8.732658  | 3.834250  | L |
| H-H1-0.088000  | 0  | 4.459287  | 9.437167  | 1.913992  | L |
| H-HC--0.012200 | 0  | 4.392008  | 6.702403  | 1.873960  | L |
| H-HC--0.012200 | 0  | 3.534039  | 6.964282  | 3.383646  | L |
| N-N--0.415700  | 0  | 1.698086  | 8.491178  | 0.677935  | L |
| C-CT--0.002400 | -1 | 0.986169  | 8.327682  | -0.583059 | L |
| C-C-0.597300   | 0  | 0.425465  | 9.639804  | -1.129433 | L |
| O-O--0.567900  | 0  | 0.411332  | 9.855032  | -2.341522 | L |
| C-CT--0.034300 | 0  | -0.125834 | 7.281434  | -0.427985 | L |
| C-CA-0.011800  | 0  | 0.352699  | 5.870729  | -0.129346 | L |
| C-CA--0.125600 | 0  | 0.757031  | 5.020342  | -1.175793 | L |
| C-CA--0.125600 | 0  | 0.335911  | 5.382736  | 1.189451  | L |
| C-CA--0.170400 | 0  | 1.126195  | 3.691784  | -0.899007 | L |
| C-CA--0.170400 | 0  | 0.711330  | 4.057792  | 1.468542  | L |
| C-CA--0.107200 | 0  | 1.101032  | 3.210438  | 0.419697  | L |

|                |    |           |           |           |   |
|----------------|----|-----------|-----------|-----------|---|
| H-H-0.271900   | 0  | 1.175109  | 8.665837  | 1.523571  | L |
| H-H1-0.097800  | 0  | 1.667893  | 7.948132  | -1.343859 | L |
| H-HC-0.029500  | 0  | -0.689012 | 7.246095  | -1.360719 | L |
| H-HC-0.029500  | 0  | -0.814701 | 7.603317  | 0.354600  | L |
| H-HA-0.133000  | 0  | 0.749044  | 5.374900  | -2.195140 | L |
| H-HA-0.133000  | 0  | -0.022863 | 6.014807  | 1.982603  | L |
| H-HA-0.143000  | 0  | 1.394583  | 3.018839  | -1.697699 | L |
| H-HA-0.143000  | 0  | 0.647110  | 3.676706  | 2.476700  | L |
| H-HA-0.129700  | 0  | 1.343052  | 2.177778  | 0.618577  | L |
| N-N--0.415700  | 0  | -0.027627 | 10.532750 | -0.248211 | L |
| C-CT--0.149000 | -1 | -0.457366 | 11.863740 | -0.623661 | L |
| H-H-0.271900   | 0  | -0.027729 | 10.274225 | 0.733211  | L |
| H-H1-0.097600  | 0  | -0.833167 | 12.386767 | 0.256251  | L |
| H-H1-0.097600  | 0  | -1.247468 | 11.795571 | -1.373341 | L |
| H-H1-0.097600  | 0  | 0.387121  | 12.414076 | -1.041137 | L |
| C-CT--0.366200 | -1 | 7.996299  | 8.432729  | -0.147245 | L |
| C-C-0.597200   | 0  | 7.532259  | 7.639523  | -1.345183 | L |
| O-O--0.567900  | 0  | 8.354149  | 7.285855  | -2.187189 | L |
| H-HC-0.112300  | 0  | 7.562233  | 9.429433  | -0.182632 | L |
| H-HC-0.112300  | 0  | 9.081900  | 8.496717  | -0.158057 | L |
| H-HC-0.112300  | 0  | 7.675749  | 7.929314  | 0.765795  | L |
| N-N--0.415700  | 0  | 6.220629  | 7.404176  | -1.445693 | L |
| C-CT--0.051800 | -1 | 5.573190  | 6.861676  | -2.648296 | L |
| C-C-0.597300   | 0  | 4.899234  | 7.958262  | -3.473318 | L |
| O-O--0.567900  | 0  | 5.210167  | 8.162341  | -4.646838 | L |
| C-CT--0.110200 | 0  | 4.657429  | 5.662416  | -2.321070 | L |
| C-CT-0.353100  | 0  | 4.897859  | 4.483727  | -3.287002 | L |
| C-CT--0.412100 | 0  | 3.995011  | 3.306657  | -2.943849 | L |
| C-CT--0.412100 | 0  | 4.625863  | 4.823160  | -4.756585 | L |
| H-H-0.271900   | 0  | 5.615950  | 7.727884  | -0.697976 | L |
| H-H1-0.092200  | 0  | 6.372916  | 6.483393  | -3.285494 | L |
| H-HC-0.045700  | 0  | 3.609777  | 5.964721  | -2.356340 | L |
| H-HC-0.045700  | 0  | 4.867184  | 5.314901  | -1.308943 | L |
| H-HC--0.036100 | 0  | 5.933526  | 4.154691  | -3.189877 | L |
| H-HC-0.100000  | 0  | 2.963933  | 3.544940  | -3.200766 | L |
| H-HC-0.100000  | 0  | 4.053057  | 3.085383  | -1.879160 | L |
| H-HC-0.100000  | 0  | 4.314505  | 2.428700  | -3.501655 | L |
| H-HC-0.100000  | 0  | 3.625686  | 5.245245  | -4.859731 | L |
| H-HC-0.100000  | 0  | 4.701198  | 3.924411  | -5.366648 | L |
| H-HC-0.100000  | 0  | 5.355948  | 5.545607  | -5.118197 | L |
| N-N--0.415700  | 0  | 4.005500  | 8.687007  | -2.818604 | L |
| C-CT--0.149000 | -1 | 3.370319  | 9.895449  | -3.274452 | L |
| H-H-0.271900   | 0  | 3.848364  | 8.406391  | -1.858686 | L |
| H-H1-0.097600  | 0  | 4.072130  | 10.485998 | -3.864582 | L |
| H-H1-0.097600  | 0  | 3.035213  | 10.480896 | -2.417038 | L |
| H-H1-0.097600  | 0  | 2.506698  | 9.643147  | -3.891994 | L |
| C-CT--0.366200 | -1 | -8.723401 | 2.384392  | 8.131190  | L |
| C-C-0.597200   | 0  | -7.861133 | 1.167452  | 7.951734  | L |
| O-O--0.567900  | 0  | -7.553784 | 0.479054  | 8.918411  | L |
| H-HC-0.112300  | 0  | -9.639239 | 2.255469  | 7.557618  | L |
| H-HC-0.112300  | 0  | -8.182682 | 3.257605  | 7.769296  | L |
| H-HC-0.112300  | 0  | -8.957233 | 2.503181  | 9.186963  | L |
| N-N--0.415700  | 0  | -7.464829 | 0.919564  | 6.711718  | L |
| C-CT--0.038900 | -1 | -6.664560 | -0.234509 | 6.297963  | L |

|                |    |           |           |          |           |
|----------------|----|-----------|-----------|----------|-----------|
| C-C-0.597300   | 0  | -5.398762 | 0.250189  | 5.614689 | L         |
| O-O--0.567900  | 0  | -5.440597 | 0.681982  | 4.463925 | L         |
| C-CT-0.365400  | 0  | -7.472233 | -1.199439 | 5.416484 | L         |
| O-OH--0.676100 | 0  | -8.034757 | -0.532649 | 4.312453 | L         |
| C-CT--0.243800 | 0  | -8.615779 | -1.828320 | 6.218094 | L         |
| H-H-0.271900   | 0  | -7.784455 | 1.546283  | 5.976645 | L         |
| H-H1-0.100700  | 0  | -6.363320 | -0.798048 | 7.180596 | L         |
| H-H1-0.004300  | 0  | -6.812923 | -1.991254 | 5.058825 | L         |
| H-HC-0.064200  | 0  | -8.212240 | -2.363562 | 7.077206 | L         |
| H-HC-0.064200  | 0  | -9.170026 | -2.525444 | 5.595830 | L         |
| H-HC-0.064200  | 0  | -9.303594 | -1.056310 | 6.561379 | L         |
| H-HO-0.410200  | 0  | -7.342222 | 0.045565  | 3.960174 | L         |
| N-N--0.415700  | 0  | -4.305912 | 0.239313  | 6.382559 | L         |
| C-CT--0.059700 | -1 | -3.109610 | 1.056176  | 6.164584 | L         |
| C-C-0.597300   | 0  | -1.863797 | 0.178008  | 6.089070 | L         |
| O-O--0.567900  | 0  | -1.603485 | -0.619940 | 6.994949 | L         |
| C-CT-0.130300  | 0  | -2.988840 | 2.131688  | 7.269520 | L         |
| C-CT--0.043000 | 0  | -4.245157 | 3.025441  | 7.422328 | L         |
| C-CT--0.320400 | 0  | -1.748602 | 3.007410  | 7.037029 | L         |
| C-CT--0.066000 | 0  | -4.666243 | 3.813509  | 6.172730 | L         |
| H-H-0.271900   | 0  | -4.373550 | -0.200724 | 7.285472 | L         |
| H-H1-0.086900  | 0  | -3.211972 | 1.578134  | 5.215873 | L         |
| H-HC-0.018700  | 0  | -2.848841 | 1.618995  | 8.223070 | L         |
| H-HC-0.023600  | 0  | -4.065860 | 3.738980  | 8.227312 | L         |
| H-HC-0.023600  | 0  | -5.085941 | 2.407339  | 7.735976 | L         |
| H-HC-0.088200  | 0  | -1.742214 | 3.370613  | 6.008994 | L         |
| H-HC-0.088200  | 0  | -0.848169 | 2.414908  | 7.200417 | L         |
| H-HC-0.088200  | 0  | -1.739261 | 3.848869  | 7.728504 | L         |
| H-HC-0.018600  | 0  | -3.864397 | 4.475583  | 5.850306 | L         |
| H-HC-0.018600  | 0  | -5.544926 | 4.415000  | 6.405838 | L         |
| H-HC-0.018600  | 0  | -4.920185 | 3.134475  | 5.361721 | L         |
| N-N--0.516300  | 0  | -1.115910 | 0.349472  | 5.003019 | L         |
| C-CT-0.038100  | -1 | 0.185138  | -0.233179 | 4.729166 | L H-HC 17 |
| C-C-0.536600   | 0  | 1.118417  | -0.078321 | 5.936269 | L         |
| O-O--0.581900  | 0  | 1.326063  | 1.012883  | 6.462222 | L         |
| C-CT--0.520019 | 0  | 0.695706  | 0.410638  | 3.426239 | H         |
| C-C-0.636404   | 0  | 0.956521  | -0.550734 | 2.277143 | H         |
| O-O2--0.608036 | 0  | 0.320309  | -1.644744 | 2.184450 | H         |
| O-O2--0.608131 | 0  | 1.817626  | -0.132931 | 1.440583 | H         |
| H-H-0.293600   | 0  | -1.516388 | 0.930367  | 4.271015 | L         |
| H-H1-0.088000  | 0  | 0.033136  | -1.301441 | 4.567955 | L         |
| H-HC-0.132300  | 0  | 1.624854  | 0.947727  | 3.629362 | H         |
| H-HC-0.188993  | 0  | -0.019352 | 1.155372  | 3.062528 | H         |
| N-N--0.415700  | 0  | 1.666100  | -1.190693 | 6.394178 | L         |
| C-CT-0.033700  | -1 | 2.567110  | -1.241234 | 7.523002 | L         |
| C-C-0.597300   | 0  | 3.788602  | -2.061506 | 7.124034 | L         |
| O-O--0.567900  | 0  | 3.841499  | -3.285984 | 7.285776 | L         |
| C-CT--0.182500 | 0  | 1.810389  | -1.801173 | 8.735784 | L         |
| H-H-0.271900   | 0  | 1.363021  | -2.066929 | 5.983714 | L         |
| H-H1-0.082300  | 0  | 2.912245  | -0.236747 | 7.775663 | L         |
| H-HC-0.060300  | 0  | 0.970639  | -1.146482 | 8.972261 | L         |
| H-HC-0.060300  | 0  | 2.480982  | -1.853062 | 9.593172 | L         |
| H-HC-0.060300  | 0  | 1.433412  | -2.800055 | 8.510393 | L         |
| N-N--0.415700  | 0  | 4.756904  | -1.367716 | 6.537892 | L         |

|                |    |           |            |           |           |
|----------------|----|-----------|------------|-----------|-----------|
| C-CT-0.018800  | -1 | 5.962273  | -1.951947  | 5.994375  | L H-HC 20 |
| C-C-0.597300   | 0  | 7.158725  | -1.806308  | 6.944064  | L         |
| O-O--0.567900  | 0  | 7.207571  | -0.956626  | 7.835957  | L         |
| C-CT--0.517456 | 0  | 6.219195  | -1.317694  | 4.625451  | H         |
| C-CM-0.287351  | 0  | 5.350925  | -1.797942  | 3.521116  | H         |
| N-N2--0.586994 | 0  | 5.495261  | -3.052271  | 2.944196  | H         |
| C-CM--0.020338 | 0  | 4.373720  | -1.189690  | 2.783939  | H         |
| C-CM-0.242458  | 0  | 4.631266  | -3.142446  | 1.898279  | H         |
| N-N2--0.505070 | 0  | 3.942232  | -2.023344  | 1.772247  | H         |
| H-H-0.271900   | 0  | 4.649472  | -0.359071  | 6.473609  | L         |
| H-H1-0.088100  | 0  | 5.813959  | -3.017969  | 5.853913  | L         |
| H-HC-0.166355  | 0  | 7.274598  | -1.484394  | 4.364156  | H         |
| H-HC-0.174481  | 0  | 6.106363  | -0.238940  | 4.758845  | H         |
| H-H-0.335795   | 0  | 6.141623  | -3.769519  | 3.266072  | H         |
| H-H4-0.152777  | 0  | 3.973302  | -0.194581  | 2.905239  | H         |
| H-H5-0.209475  | 0  | 4.533419  | -4.008308  | 1.258196  | H         |
| N-N--0.415700  | 0  | 8.161921  | -2.646932  | 6.697759  | L         |
| C-CT--0.149000 | -1 | 9.432050  | -2.577583  | 7.387085  | L         |
| H-H-0.271900   | 0  | 8.008419  | -3.325163  | 5.958162  | L         |
| H-H1-0.097600  | 0  | 10.103072 | -3.348897  | 7.007957  | L         |
| H-H1-0.097600  | 0  | 9.275041  | -2.723730  | 8.457152  | L         |
| H-H1-0.097600  | 0  | 9.880623  | -1.595327  | 7.227790  | L         |
| C-CT--0.366200 | -1 | 8.348637  | -9.389873  | 0.921055  | L         |
| C-C-0.597200   | 0  | 8.729052  | -9.163669  | -0.529802 | L         |
| O-O--0.567900  | 0  | 9.765974  | -8.564895  | -0.788603 | L         |
| H-HC-0.112300  | 0  | 8.265072  | -10.455655 | 1.120017  | L         |
| H-HC-0.112300  | 0  | 7.410457  | -8.881081  | 1.135145  | L         |
| H-HC-0.112300  | 0  | 9.127758  | -8.962616  | 1.552207  | L         |
| N-N--0.254800  | 0  | 7.908530  | -9.617328  | -1.493998 | L         |
| C-CT--0.026600 | -1 | 8.150870  | -9.378200  | -2.919003 | L         |
| C-C-0.589600   | 0  | 8.006147  | -7.904211  | -3.297659 | L         |
| O-O--0.574800  | 0  | 8.721371  | -7.407836  | -4.164913 | L         |
| C-CT--0.007000 | 0  | 7.139661  | -10.266393 | -3.651630 | L         |
| C-CT-0.018900  | 0  | 5.979859  | -10.388318 | -2.661916 | L         |
| C-CT-0.019200  | 0  | 6.673059  | -10.364452 | -1.298778 | L         |
| H-H1-0.064100  | 0  | 9.161894  | -9.692172  | -3.181603 | L         |
| H-HC-0.025300  | 0  | 7.579172  | -11.251393 | -3.815857 | L         |
| H-HC-0.025300  | 0  | 6.819794  | -9.833307  | -4.600692 | L         |
| H-HC-0.021300  | 0  | 5.415454  | -11.309248 | -2.811248 | L         |
| H-HC-0.021300  | 0  | 5.324371  | -9.520968  | -2.754851 | L         |
| H-H1-0.039100  | 0  | 6.027786  | -9.887816  | -0.559451 | L         |
| H-H1-0.039100  | 0  | 6.912490  | -11.382601 | -0.989085 | L         |
| N-N--0.516300  | 0  | 7.082763  | -7.207580  | -2.634213 | L         |
| C-CT-0.039700  | -1 | 6.830922  | -5.780576  | -2.805257 | L         |
| C-C-0.536600   | 0  | 8.091666  | -4.917146  | -2.675369 | L         |
| O-O--0.581900  | 0  | 8.269889  | -3.934592  | -3.398836 | L         |
| C-CT-0.056000  | 0  | 5.733449  | -5.343116  | -1.831559 | L H-HC 24 |
| C-CT--0.515956 | 0  | 5.203428  | -3.960341  | -2.218790 | H         |
| C-C-0.587828   | 0  | 4.122210  | -3.415033  | -1.296973 | H         |
| O-O2--0.600319 | 0  | 4.076935  | -2.133558  | -1.260305 | H         |
| O-O2--0.589127 | 0  | 3.362768  | -4.197971  | -0.680055 | H         |
| H-H-0.293600   | 0  | 6.545421  | -7.684834  | -1.929735 | L         |
| H-H1-0.110500  | 0  | 6.455888  | -5.626607  | -3.817477 | L         |
| H-HC--0.017300 | 0  | 6.129320  | -5.318195  | -0.815095 | L         |



|                |    |           |           |           |   |
|----------------|----|-----------|-----------|-----------|---|
| H-HC--0.017300 | 0  | 4.911300  | -6.059382 | -1.875412 | L |
| H-HC-0.167759  | 0  | 4.790927  | -4.017934 | -3.233031 | H |
| H-HC-0.135230  | 0  | 6.027142  | -3.238871 | -2.244273 | H |
| N-N--0.415700  | 0  | 9.000082  | -5.323876 | -1.791245 | L |
| C-CT--0.024900 | -1 | 10.240462 | -4.625637 | -1.474889 | L |
| C-C-0.597300   | 0  | 11.263290 | -4.516405 | -2.598925 | L |
| O-O--0.567900  | 0  | 12.246981 | -3.788615 | -2.462801 | L |
| C-CT-0.211700  | 0  | 10.879665 | -5.265359 | -0.236109 | L |
| O-OH--0.654600 | 0  | 9.922766  | -5.460304 | 0.794854  | L |
| H-H-0.271900   | 0  | 8.787200  | -6.131331 | -1.222117 | L |
| H-H1-0.084300  | 0  | 9.975992  | -3.601480 | -1.207173 | L |
| H-H1-0.035200  | 0  | 11.678055 | -4.618186 | 0.129915  | L |
| H-H1-0.035200  | 0  | 11.306844 | -6.232154 | -0.506731 | L |
| H-HO-0.427500  | 0  | 9.370182  | -4.650987 | 0.876899  | L |
| N-N--0.415700  | 0  | 11.021927 | -5.197188 | -3.717391 | L |
| C-CT-0.033700  | -1 | 11.773268 | -5.033756 | -4.955072 | L |
| C-C-0.597300   | 0  | 10.943112 | -4.473733 | -6.114706 | L |
| O-O--0.567900  | 0  | 11.375815 | -4.487713 | -7.266377 | L |
| C-CT--0.182500 | 0  | 12.397809 | -6.395922 | -5.290791 | L |
| H-H-0.271900   | 0  | 10.205062 | -5.797646 | -3.727171 | L |
| H-H1-0.082300  | 0  | 12.590130 | -4.327828 | -4.799077 | L |
| H-HC-0.060300  | 0  | 13.012388 | -6.736364 | -4.456707 | L |
| H-HC-0.060300  | 0  | 13.025315 | -6.304757 | -6.178014 | L |
| H-HC-0.060300  | 0  | 11.610352 | -7.126573 | -5.482589 | L |
| N-N--0.415700  | 0  | 9.765812  | -3.951382 | -5.789130 | L |
| C-CT--0.025200 | -1 | 8.861061  | -3.271691 | -6.693119 | L |
| C-C-0.597300   | 0  | 8.805555  | -1.768610 | -6.469840 | L |
| O-O--0.567900  | 0  | 8.833646  | -0.993349 | -7.422983 | L |
| H-H-0.271900   | 0  | 9.487452  | -4.006872 | -4.815548 | L |
| H-H1-0.069800  | 0  | 7.856096  | -3.668572 | -6.552625 | L |
| H-H1-0.069800  | 0  | 9.154058  | -3.451307 | -7.727982 | L |
| N-N--0.415700  | 0  | 8.730345  | -1.365978 | -5.204626 | L |
| C-CT--0.002400 | -1 | 8.582707  | 0.021457  | -4.783274 | L |
| C-C-0.597300   | 0  | 9.714228  | 0.450618  | -3.840878 | L |
| O-O--0.567900  | 0  | 10.352417 | -0.403463 | -3.216888 | L |
| C-CT--0.034300 | 0  | 7.210505  | 0.161704  | -4.098100 | L |
| C-CA-0.011800  | 0  | 6.035807  | -0.012046 | -5.042060 | L |
| C-CA--0.125600 | 0  | 5.708552  | 1.011528  | -5.951807 | L |
| C-CA--0.125600 | 0  | 5.281365  | -1.200194 | -5.029759 | L |
| C-CA--0.170400 | 0  | 4.641489  | 0.843689  | -6.852533 | L |
| C-CA--0.170400 | 0  | 4.211322  | -1.365454 | -5.926868 | L |
| C-CA--0.107200 | 0  | 3.896064  | -0.348275 | -6.844051 | L |
| H-H-0.271900   | 0  | 8.721623  | -2.075520 | -4.481167 | L |
| H-H1-0.097800  | 0  | 8.605100  | 0.672022  | -5.657603 | L |
| H-HC-0.029500  | 0  | 7.125425  | 1.143005  | -3.632245 | L |
| H-HC-0.029500  | 0  | 7.143540  | -0.574662 | -3.295388 | L |
| H-HA-0.133000  | 0  | 6.280524  | 1.927633  | -5.965471 | L |
| H-HA-0.133000  | 0  | 5.521749  | -1.989158 | -4.332566 | L |
| H-HA-0.143000  | 0  | 4.392286  | 1.631576  | -7.549046 | L |
| H-HA-0.143000  | 0  | 3.625351  | -2.272754 | -5.908114 | L |
| H-HA-0.129700  | 0  | 3.070565  | -0.478281 | -7.529646 | L |
| N-N--0.254800  | 0  | 9.963727  | 1.764721  | -3.685007 | L |
| C-CT--0.026600 | -1 | 10.822665 | 2.256769  | -2.613518 | L |
| C-C-0.589600   | 0  | 10.188951 | 1.997922  | -1.237729 | L |

|                |    |           |           |           |           |
|----------------|----|-----------|-----------|-----------|-----------|
| O-O--0.574800  | 0  | 8.996890  | 1.683176  | -1.160667 | L         |
| C-CT--0.007000 | 0  | 10.975204 | 3.758955  | -2.886994 | L         |
| C-CT-0.018900  | 0  | 9.656191  | 4.125763  | -3.564664 | L         |
| C-CT-0.019200  | 0  | 9.353807  | 2.882313  | -4.400569 | L         |
| H-H1-0.064100  | 0  | 11.794869 | 1.768236  | -2.670439 | L         |
| H-HC-0.025300  | 0  | 11.798997 | 3.920304  | -3.583778 | L         |
| H-HC-0.025300  | 0  | 11.130750 | 4.338658  | -1.975800 | L         |
| H-HC-0.021300  | 0  | 9.749170  | 5.019507  | -4.182435 | L         |
| H-HC-0.021300  | 0  | 8.878715  | 4.261256  | -2.810097 | L         |
| H-H1-0.039100  | 0  | 8.276258  | 2.770289  | -4.510501 | L         |
| H-H1-0.039100  | 0  | 9.820137  | 2.977554  | -5.381968 | L         |
| N-N--0.254800  | 0  | 10.953022 | 2.115599  | -0.141141 | L         |
| C-CT--0.026600 | -1 | 10.398875 | 2.108706  | 1.206093  | L         |
| C-C-0.589600   | 0  | 9.347104  | 3.194733  | 1.433630  | L         |
| O-O--0.574800  | 0  | 9.609566  | 4.373658  | 1.206977  | L         |
| C-CT--0.007000 | 0  | 11.597875 | 2.296437  | 2.146502  | L         |
| C-CT-0.018900  | 0  | 12.785865 | 1.808799  | 1.320771  | L         |
| C-CT-0.019200  | 0  | 12.402560 | 2.221398  | -0.097485 | L         |
| H-H1-0.064100  | 0  | 9.957571  | 1.128070  | 1.389925  | L         |
| H-HC-0.025300  | 0  | 11.481077 | 1.719169  | 3.064239  | L         |
| H-HC-0.025300  | 0  | 11.739307 | 3.353202  | 2.380538  | L         |
| H-HC-0.021300  | 0  | 12.851691 | 0.720971  | 1.378711  | L         |
| H-HC-0.021300  | 0  | 13.720704 | 2.270817  | 1.639014  | L         |
| H-H1-0.039100  | 0  | 12.697946 | 3.255968  | -0.277329 | L         |
| H-H1-0.039100  | 0  | 12.880553 | 1.554504  | -0.815916 | L         |
| N-N--0.415700  | 0  | 8.178093  | 2.772225  | 1.904675  | L         |
| C-CT-0.018800  | -1 | 7.023299  | 3.601503  | 2.203927  | L H-HC 33 |
| C-C-0.597300   | 0  | 6.167906  | 3.013134  | 3.322558  | L         |
| O-O--0.567900  | 0  | 6.187750  | 1.804415  | 3.553551  | L         |
| C-CT--0.515368 | 0  | 6.195091  | 3.721888  | 0.896369  | H         |
| C-CM-0.287903  | 0  | 5.598482  | 2.444171  | 0.385904  | H         |
| N-N2--0.582625 | 0  | 6.238119  | 1.643978  | -0.547251 | H         |
| C-CM--0.036893 | 0  | 4.467363  | 1.731495  | 0.712891  | H         |
| C-CM-0.243454  | 0  | 5.505671  | 0.518072  | -0.740561 | H         |
| N-N2--0.523998 | 0  | 4.428549  | 0.535074  | 0.023099  | H         |
| H-H-0.271900   | 0  | 8.039469  | 1.775656  | 1.991922  | L         |
| H-H1-0.088100  | 0  | 7.360007  | 4.596131  | 2.511522  | L         |
| H-HC-0.162301  | 0  | 6.846642  | 4.178150  | 0.136673  | H         |
| H-HC-0.188340  | 0  | 5.401470  | 4.455814  | 1.082255  | H         |
| H-H-0.339448   | 0  | 7.149353  | 1.845749  | -0.958803 | H         |
| H-H4-0.185957  | 0  | 3.680232  | 2.002835  | 1.401698  | H         |
| H-H5-0.211295  | 0  | 5.785776  | -0.281898 | -1.410593 | H         |
| N-N--0.415700  | 0  | 5.398330  | 3.877706  | 3.972217  | L         |
| C-CT-0.014300  | -1 | 4.557936  | 3.588736  | 5.125011  | L         |
| C-C-0.597300   | 0  | 5.207375  | 2.638995  | 6.142921  | L         |
| O-O--0.567900  | 0  | 4.684246  | 1.586385  | 6.512473  | L         |
| C-CT--0.204100 | 0  | 3.106386  | 3.315005  | 4.706006  | L         |
| C-C-0.713000   | 0  | 2.176450  | 4.199153  | 5.516034  | L         |
| N-N--0.919100  | 0  | 1.579457  | 3.709606  | 6.567101  | L         |
| O-O--0.593100  | 0  | 2.010783  | 5.377248  | 5.251339  | L         |
| H-H-0.271900   | 0  | 5.533106  | 4.865176  | 3.747734  | L         |
| H-H1-0.104800  | 0  | 4.529243  | 4.543619  | 5.654885  | L         |
| H-HC-0.079700  | 0  | 2.867114  | 2.267300  | 4.855465  | L         |
| H-HC-0.079700  | 0  | 2.960011  | 3.559500  | 3.654159  | L         |

|                |    |           |           |           |           |
|----------------|----|-----------|-----------|-----------|-----------|
| H-H-0.419600   | 0  | 0.919930  | 4.292740  | 7.034890  | L         |
| H-H-0.419600   | 0  | 1.616053  | 2.698663  | 6.697426  | L         |
| N-N--0.415700  | 0  | 6.393890  | 3.069838  | 6.584492  | L         |
| C-CT--0.149000 | -1 | 7.300576  | 2.323207  | 7.435118  | L         |
| H-H-0.271900   | 0  | 6.706367  | 3.943176  | 6.183321  | L         |
| H-H1-0.097600  | 0  | 8.057187  | 2.985228  | 7.855683  | L         |
| H-H1-0.097600  | 0  | 7.784840  | 1.538330  | 6.850966  | L         |
| H-H1-0.097600  | 0  | 6.742491  | 1.846065  | 8.243842  | L         |
| C-CT--0.366200 | -1 | -2.253919 | -2.736796 | 9.540265  | L         |
| C-C-0.597200   | 0  | -2.371277 | -3.831125 | 8.515259  | L         |
| O-O--0.567900  | 0  | -2.894735 | -4.900873 | 8.815409  | L         |
| H-HC-0.112300  | 0  | -1.201456 | -2.508725 | 9.697442  | L         |
| H-HC-0.112300  | 0  | -2.704999 | -3.070894 | 10.472109 | L         |
| H-HC-0.112300  | 0  | -2.769876 | -1.850416 | 9.175798  | L         |
| N-N--0.347900  | 0  | -1.856072 | -3.566064 | 7.317959  | L         |
| C-CT--0.240000 | -1 | -1.749105 | -4.534127 | 6.220099  | L         |
| C-C-0.734100   | 0  | -0.336189 | -4.573539 | 5.649535  | L         |
| O-O--0.589400  | 0  | 0.487069  | -3.704178 | 5.921105  | L         |
| C-CT--0.009400 | 0  | -2.834628 | -4.242690 | 5.163294  | L         |
| C-CT-0.018700  | 0  | -2.597338 | -2.966136 | 4.345117  | L H-HC 37 |
| C-CT--0.464524 | 0  | -3.700318 | -2.778946 | 3.296459  | H         |
| C-CT--0.195159 | 0  | -3.599729 | -1.476625 | 2.512427  | H         |
| N-N3--0.748751 | 0  | -2.407829 | -1.426747 | 1.598557  | H         |
| H-H-0.274700   | 0  | -1.474145 | -2.633238 | 7.175219  | L         |
| H-H1-0.142600  | 0  | -1.942714 | -5.529064 | 6.621279  | L         |
| H-HC-0.036200  | 0  | -3.801454 | -4.168622 | 5.664163  | L         |
| H-HC-0.036200  | 0  | -2.893818 | -5.078310 | 4.473245  | L         |
| H-HC-0.010300  | 0  | -1.631451 | -3.020965 | 3.842520  | L         |
| H-HC-0.010300  | 0  | -2.606991 | -2.112350 | 5.014928  | L         |
| H-HC-0.173903  | 0  | -4.665767 | -2.777822 | 3.810990  | H         |
| H-HC-0.148535  | 0  | -3.699728 | -3.641722 | 2.615300  | H         |
| H-HP-0.236066  | 0  | -3.546199 | -0.592170 | 3.145347  | H         |
| H-HP-0.172509  | 0  | -4.471999 | -1.371195 | 1.855922  | H         |
| H-H-0.437293   | 0  | -2.282066 | -0.462655 | 1.183024  | H         |
| H-H-0.366736   | 0  | -2.559556 | -2.075526 | 0.817744  | H         |
| H-H-0.419451   | 0  | -1.486039 | -1.634302 | 2.045682  | H         |
| N-N--0.415700  | 0  | -0.043208 | -5.602682 | 4.867420  | L         |
| C-CT--0.025200 | -1 | 1.271217  | -5.804141 | 4.266847  | L         |
| C-C-0.597300   | 0  | 1.145152  | -6.519174 | 2.920815  | L         |
| O-O--0.567900  | 0  | 1.731561  | -7.574766 | 2.689644  | L         |
| H-H-0.271900   | 0  | -0.789738 | -6.250316 | 4.632920  | L         |
| H-H1-0.069800  | 0  | 1.890408  | -6.407398 | 4.930788  | L         |
| H-H1-0.069800  | 0  | 1.764796  | -4.846264 | 4.098878  | L         |
| N-N--0.415700  | 0  | 0.327818  | -5.933241 | 2.049933  | L         |
| C-CT--0.025200 | -1 | -0.239077 | -6.532848 | 0.845228  | L         |
| C-C-0.597300   | 0  | -1.384246 | -5.661515 | 0.399852  | L         |
| O-O--0.567900  | 0  | -2.293992 | -5.444716 | 1.191931  | L         |
| H-H-0.271900   | 0  | -0.111124 | -5.081625 | 2.374446  | L         |
| H-H1-0.069800  | 0  | -0.614262 | -7.530872 | 1.071510  | L         |
| H-H1-0.069800  | 0  | 0.524811  | -6.590533 | 0.069321  | L         |
| N-N--0.415700  | 0  | -1.318459 | -5.168813 | -0.836740 | L         |
| C-CT--0.001400 | -1 | -2.161661 | -4.096710 | -1.367035 | L         |
| C-C-0.597300   | 0  | -3.624918 | -4.172336 | -0.915920 | L         |
| O-O--0.567900  | 0  | -4.183011 | -3.214333 | -0.392665 | L         |

|                |    |           |            |           |   |
|----------------|----|-----------|------------|-----------|---|
| C-CT--0.015200 | 0  | -2.064817 | -4.084626  | -2.906626 | L |
| C-CA--0.001100 | 0  | -0.672757 | -4.258519  | -3.490048 | L |
| C-CA--0.190600 | 0  | 0.338337  | -3.320449  | -3.208545 | L |
| C-CA--0.190600 | 0  | -0.394772 | -5.357007  | -4.328310 | L |
| C-CA--0.234100 | 0  | 1.625510  | -3.480954  | -3.755614 | L |
| C-CA--0.234100 | 0  | 0.889812  | -5.520082  | -4.880952 | L |
| C-C-0.322600   | 0  | 1.903787  | -4.579885  | -4.593889 | L |
| O-OH--0.557900 | 0  | 3.137518  | -4.736383  | -5.143429 | L |
| H-H-0.271900   | 0  | -0.476897 | -5.348207  | -1.365766 | L |
| H-H1-0.087600  | 0  | -1.758521 | -3.153322  | -0.999075 | L |
| H-HC-0.029500  | 0  | -2.463151 | -3.142304  | -3.275995 | L |
| H-HC-0.029500  | 0  | -2.704167 | -4.872719  | -3.304855 | L |
| H-HA-0.169900  | 0  | 0.130665  | -2.464866  | -2.576187 | L |
| H-HA-0.169900  | 0  | -1.176499 | -6.063432  | -4.565933 | L |
| H-HA-0.165600  | 0  | 2.396818  | -2.757979  | -3.533603 | L |
| H-HA-0.165600  | 0  | 1.093867  | -6.354167  | -5.531829 | L |
| H-HO-0.399200  | 0  | 3.146838  | -5.467801  | -5.758243 | L |
| N-N--0.415700  | 0  | -4.228807 | -5.349983  | -1.088631 | L |
| C-CT--0.024900 | -1 | -5.564186 | -5.635334  | -0.584661 | L |
| C-C-0.597300   | 0  | -5.693030 | -5.565793  | 0.935361  | L |
| O-O--0.567900  | 0  | -5.082015 | -6.346719  | 1.674743  | L |
| C-CT-0.211700  | 0  | -6.034808 | -7.023855  | -1.020312 | L |
| O-OH--0.654600 | -1 | -7.286517 | -7.333550  | -0.422605 | L |
| H-H-0.271900   | 0  | -3.660544 | -6.086504  | -1.465681 | L |
| H-H1-0.084300  | 0  | -6.247781 | -4.906336  | -1.020250 | L |
| H-H1-0.035200  | 0  | -5.299823 | -7.766193  | -0.706898 | L |
| H-H1-0.035200  | 0  | -6.124713 | -7.052353  | -2.106250 | L |
| H-HO-0.427500  | -1 | -7.545053 | -8.205766  | -0.730330 | L |
| N-N--0.415700  | 0  | -6.656998 | -4.754954  | 1.364715  | L |
| C-CT-0.033700  | -1 | -7.161061 | -4.658386  | 2.723364  | L |
| C-C-0.597300   | 0  | -7.535241 | -5.979710  | 3.400002  | L |
| O-O--0.567900  | 0  | -7.513251 | -6.070963  | 4.625906  | L |
| C-CT--0.182500 | 0  | -8.340955 | -3.685933  | 2.718244  | L |
| H-H-0.271900   | 0  | -7.097082 | -4.157426  | 0.671329  | L |
| H-H1-0.082300  | 0  | -6.373312 | -4.217583  | 3.333606  | L |
| H-HC-0.060300  | 0  | -8.037104 | -2.724065  | 2.300804  | L |
| H-HC-0.060300  | 0  | -8.689835 | -3.537722  | 3.735525  | L |
| H-HC-0.060300  | 0  | -9.156256 | -4.099894  | 2.130831  | L |
| N-N--0.415700  | 0  | -7.894279 | -6.995914  | 2.615071  | L |
| C-CT--0.025200 | -1 | -8.290760 | -8.302537  | 3.124914  | L |
| C-C-0.597300   | 0  | -7.323011 | -9.439400  | 2.827600  | L |
| O-O--0.567900  | 0  | -7.721231 | -10.602162 | 2.863772  | L |
| H-H-0.271900   | 0  | -7.848029 | -6.837039  | 1.614793  | L |
| H-H1-0.069800  | 0  | -9.251502 | -8.564781  | 2.683154  | L |
| H-H1-0.069800  | 0  | -8.431278 | -8.265339  | 4.205409  | L |
| N-N--0.415700  | 0  | -6.054094 | -9.128039  | 2.569144  | L |
| C-CT--0.024900 | -1 | -4.976476 | -10.115162 | 2.602617  | L |
| C-C-0.597300   | 0  | -4.290159 | -10.076652 | 3.962253  | L |
| O-O--0.567900  | 0  | -3.979161 | -9.001319  | 4.483625  | L |
| C-CT-0.211700  | 0  | -3.970978 | -9.816324  | 1.485152  | L |
| O-OH--0.654600 | -1 | -3.098539 | -10.917630 | 1.284883  | L |
| H-H-0.271900   | 0  | -5.806217 | -8.142274  | 2.559723  | L |
| H-H1-0.084300  | 0  | -5.381980 | -11.112216 | 2.430374  | L |
| H-H1-0.035200  | 0  | -3.397147 | -8.920561  | 1.728443  | L |

|                |    |            |            |           |           |
|----------------|----|------------|------------|-----------|-----------|
| H-H1-0.035200  | 0  | -4.518705  | -9.637590  | 0.559017  | L         |
| H-HO-0.427500  | -1 | -2.557645  | -10.729735 | 0.514313  | L         |
| N-N--0.415700  | 0  | -4.084319  | -11.254983 | 4.549594  | L         |
| C-CT--0.149000 | -1 | -3.542009  | -11.403621 | 5.888767  | L         |
| H-H-0.271900   | 0  | -4.358451  | -12.073201 | 4.029616  | L         |
| H-H1-0.097600  | 0  | -3.318920  | -12.450623 | 6.093614  | L         |
| H-H1-0.097600  | 0  | -4.262565  | -11.037281 | 6.623326  | L         |
| H-H1-0.097600  | 0  | -2.625482  | -10.816720 | 5.986392  | L         |
| C-CT--0.366200 | -1 | -12.133249 | 5.103409   | -0.649345 | L         |
| C-C-0.597200   | 0  | -10.704997 | 5.290522   | -0.209327 | L         |
| O-O--0.567900  | 0  | -10.392614 | 5.027254   | 0.946428  | L         |
| H-HC-0.112300  | 0  | -12.526923 | 6.053012   | -1.004803 | L         |
| H-HC-0.112300  | 0  | -12.719679 | 4.756798   | 0.199905  | L         |
| H-HC-0.112300  | 0  | -12.164801 | 4.356854   | -1.440800 | L         |
| N-N--0.415700  | 0  | -9.854516  | 5.734507   | -1.131075 | L         |
| C-CT--0.025200 | -1 | -8.420578  | 5.890083   | -0.901309 | L         |
| C-C-0.597300   | 0  | -7.601641  | 5.827657   | -2.166009 | L         |
| O-O--0.567900  | 0  | -8.095525  | 6.195449   | -3.238876 | L         |
| H-H-0.271900   | 0  | -10.164347 | 5.897954   | -2.076507 | L         |
| H-H1-0.069800  | 0  | -8.105856  | 5.072295   | -0.262480 | L         |
| H-H1-0.069800  | 0  | -8.217842  | 6.832974   | -0.395462 | L         |
| N-N--0.415700  | 0  | -6.358708  | 5.371956   | -2.002996 | L H-H1 48 |
| C-CT--0.530209 | -1 | -5.336599  | 5.312371   | -3.045967 | H         |
| C-C-0.568093   | 0  | -4.654288  | 3.956753   | -2.954036 | H         |
| O-O--0.528105  | 0  | -4.691460  | 3.298090   | -1.911700 | H         |
| C-CT-0.298500  | 0  | -4.361903  | 6.508505   | -2.938984 | L H-H1 48 |
| C-CT--0.319200 | 0  | -5.075631  | 7.826161   | -3.250705 | L         |
| C-CT--0.319200 | 0  | -3.700123  | 6.607088   | -1.562263 | L         |
| H-H-0.271900   | 0  | -6.079290  | 5.027321   | -1.086622 | L         |
| H-H1-0.184096  | 0  | -5.845915  | 5.409680   | -4.012329 | H         |
| H-HC--0.029700 | 0  | -3.577453  | 6.384557   | -3.684065 | L         |
| H-HC-0.079100  | 0  | -5.813724  | 8.042266   | -2.480071 | L         |
| H-HC-0.079100  | 0  | -5.573196  | 7.749971   | -4.216244 | L         |
| H-HC-0.079100  | 0  | -4.344628  | 8.632853   | -3.284449 | L         |
| H-HC-0.079100  | 0  | -4.447243  | 6.737730   | -0.781392 | L         |
| H-HC-0.079100  | 0  | -3.013006  | 7.449726   | -1.542181 | L         |
| H-HC-0.079100  | 0  | -3.141662  | 5.692137   | -1.356859 | L         |
| N-N--0.610103  | 0  | -3.986307  | 3.550219   | -4.062143 | H         |
| C-CT--0.314060 | -1 | -4.225753  | 4.019736   | -5.423019 | H         |
| C-C-0.597300   | 0  | -5.339992  | 3.206554   | -6.069517 | L H-H1 50 |
| O-O--0.567900  | 0  | -5.465984  | 1.999971   | -5.863610 | L         |
| C-CT--0.110200 | 0  | -2.921115  | 3.887479   | -6.245173 | L H-H1 50 |
| C-CT-0.353100  | 0  | -1.835060  | 4.942701   | -5.927305 | L         |
| C-CT--0.412100 | 0  | -1.047569  | 4.681566   | -4.641092 | L         |
| C-CT--0.412100 | 0  | -0.816895  | 4.986235   | -7.071660 | L         |
| H-H-0.398207   | 0  | -3.541806  | 2.637828   | -3.972338 | H         |
| H-H1-0.165130  | 0  | -4.512462  | 5.069937   | -5.422537 | H         |
| H-HC-0.045700  | 0  | -3.188510  | 3.994063   | -7.296515 | L         |
| H-HC-0.045700  | 0  | -2.504540  | 2.888430   | -6.114772 | L         |
| H-HC--0.036100 | 0  | -2.302526  | 5.925925   | -5.863921 | L         |
| H-HC-0.100000  | 0  | -0.618072  | 3.681828   | -4.660769 | L         |
| H-HC-0.100000  | 0  | -1.711505  | 4.749443   | -3.779631 | L         |
| H-HC-0.100000  | 0  | -0.260236  | 5.423468   | -4.521670 | L         |
| H-HC-0.100000  | 0  | -0.320910  | 4.020698   | -7.158754 | L         |

|                |    |           |           |            |           |
|----------------|----|-----------|-----------|------------|-----------|
| H-HC-0.100000  | 0  | -0.072457 | 5.755709  | -6.868201  | L         |
| H-HC-0.100000  | 0  | -1.321415 | 5.224143  | -8.006401  | L         |
| N-N--0.415700  | 0  | -6.129116 | 3.857989  | -6.916515  | L         |
| C-CT--0.038900 | -1 | -7.317818 | 3.255981  | -7.532380  | L         |
| C-C-0.597300   | 0  | -7.075199 | 1.921025  | -8.226567  | L         |
| O-O--0.567900  | 0  | -7.959384 | 1.068084  | -8.275468  | L         |
| C-CT-0.365400  | -1 | -7.953857 | 4.181989  | -8.593478  | L         |
| O-OH--0.676100 | -1 | -7.890514 | 5.538783  | -8.144528  | L         |
| C-CT--0.243800 | 0  | -9.433129 | 3.895768  | -8.852225  | L         |
| H-H-0.271900   | 0  | -6.011585 | 4.857127  | -6.996537  | L         |
| H-H1-0.100700  | 0  | -8.056561 | 3.114549  | -6.750391  | L         |
| H-H1-0.004300  | 0  | -7.399139 | 4.105916  | -9.529704  | L         |
| H-HC-0.064200  | 0  | -9.551338 | 2.893140  | -9.262676  | L         |
| H-HC-0.064200  | 0  | -9.826205 | 4.612089  | -9.573420  | L         |
| H-HC-0.064200  | 0  | -9.995849 | 3.966015  | -7.920552  | L         |
| H-HO-0.410200  | -1 | -8.788295 | 5.875082  | -8.108880  | L         |
| N-N--0.415700  | 0  | -5.899220 | 1.784737  | -8.835839  | L         |
| C-CT--0.025200 | -1 | -5.513833 | 0.626016  | -9.627730  | L         |
| C-C-0.597300   | 0  | -4.606351 | -0.367876 | -8.934710  | L         |
| O-O--0.567900  | 0  | -4.113965 | -1.273270 | -9.608952  | L         |
| H-H-0.271900   | 0  | -5.210485 | 2.495730  | -8.640995  | L         |
| H-H1-0.069800  | 0  | -4.993668 | 0.971254  | -10.519985 | L         |
| H-H1-0.069800  | 0  | -6.401760 | 0.084132  | -9.953194  | L         |
| N-N--0.415700  | 0  | -4.382037 | -0.185141 | -7.628078  | L H-H1 54 |
| C-CT--0.539097 | -1 | -3.472826 | -0.989661 | -6.824700  | H         |
| C-C-0.572106   | 0  | -4.227082 | -1.439712 | -5.570220  | H         |
| O-O--0.533001  | 0  | -4.952311 | -2.429967 | -5.654263  | H         |
| C-CT-0.130300  | 0  | -2.095793 | -0.301082 | -6.644589  | L H-H1 54 |
| C-CT--0.043000 | 0  | -1.465696 | 0.131914  | -7.989578  | L         |
| C-CT--0.320400 | 0  | -1.183367 | -1.306347 | -5.919886  | L         |
| C-CT--0.066000 | 0  | -0.110786 | 0.839961  | -7.858243  | L         |
| H-H-0.271900   | 0  | -4.845181 | 0.584426  | -7.152262  | L         |
| H-H1-0.180646  | 0  | -3.293286 | -1.916415 | -7.381207  | H         |
| H-HC-0.018700  | 0  | -2.220644 | 0.586829  | -6.031654  | L         |
| H-HC-0.023600  | 0  | -2.136167 | 0.834961  | -8.482327  | L         |
| H-HC-0.023600  | 0  | -1.350915 | -0.739952 | -8.634754  | L         |
| H-HC-0.088200  | 0  | -1.078202 | -2.214877 | -6.511042  | L         |
| H-HC-0.088200  | 0  | -1.602396 | -1.560357 | -4.947647  | L         |
| H-HC-0.088200  | 0  | -0.201001 | -0.880221 | -5.737206  | L         |
| H-HC-0.018600  | 0  | -0.187919 | 1.653385  | -7.137777  | L         |
| H-HC-0.018600  | 0  | 0.177428  | 1.248288  | -8.826887  | L         |
| H-HC-0.018600  | 0  | 0.657584  | 0.138301  | -7.536876  | L         |
| N-N--0.611145  | 0  | -4.099277 | -0.681769 | -4.454080  | H         |
| C-CT--0.109296 | -1 | -4.637727 | -1.092524 | -3.162842  | H         |
| C-C-0.597300   | 0  | -6.166914 | -1.107965 | -3.145405  | L H-H1 56 |
| O-O--0.567900  | 0  | -6.797910 | -2.043413 | -2.638219  | L         |
| C-CT--0.388038 | 0  | -4.038126 | -0.267693 | -2.038529  | H         |
| H-H-0.369964   | 0  | -3.428522 | 0.083097  | -4.413494  | H         |
| H-H1-0.178541  | 0  | -4.377438 | -2.141632 | -2.987573  | H         |
| H-H1-0.157964  | 0  | -4.519722 | -0.581359 | -1.104892  | H         |
| H-H1-0.179833  | 0  | -4.202428 | 0.807176  | -2.150760  | H         |
| H-HS-0.319500  | 0  | -1.763347 | 1.639176  | -0.247085  | H         |
| N-N--0.415700  | 0  | -6.758265 | -0.113513 | -3.795299  | L         |
| C-CT--0.087500 | -1 | -8.193013 | -0.047355 | -4.058419  | L         |

|                |    |            |           |           |   |
|----------------|----|------------|-----------|-----------|---|
| C-C-0.597300   | 0  | -8.675810  | -1.198720 | -4.927032 | L |
| O-O--0.567900  | 0  | -9.624657  | -1.891347 | -4.558615 | L |
| C-CT-0.298500  | 0  | -8.577584  | 1.315570  | -4.653245 | L |
| C-CT--0.319200 | 0  | -10.091054 | 1.450250  | -4.870966 | L |
| C-CT--0.319200 | 0  | -8.138834  | 2.491755  | -3.766462 | L |
| H-H-0.271900   | 0  | -6.114606  | 0.567926  | -4.190035 | L |
| H-H1-0.096900  | 0  | -8.707204  | -0.141678 | -3.104673 | L |
| H-HC--0.029700 | 0  | -8.085427  | 1.397435  | -5.613842 | L |
| H-HC-0.079100  | 0  | -10.614940 | 1.305264  | -3.925909 | L |
| H-HC-0.079100  | 0  | -10.433971 | 0.708905  | -5.592424 | L |
| H-HC-0.079100  | 0  | -10.319020 | 2.440729  | -5.263604 | L |
| H-HC-0.079100  | 0  | -8.607143  | 2.429087  | -2.786120 | L |
| H-HC-0.079100  | 0  | -8.404343  | 3.439811  | -4.233254 | L |
| H-HC-0.079100  | 0  | -7.056567  | 2.485449  | -3.630942 | L |
| N-N--0.415700  | 0  | -8.037277  | -1.411904 | -6.076038 | L |
| C-CT--0.025200 | -1 | -8.405966  | -2.462073 | -7.022745 | L |
| C-C-0.597300   | 0  | -8.317350  | -3.867112 | -6.440129 | L |
| O-O--0.567900  | 0  | -9.212374  | -4.684250 | -6.646495 | L |
| H-H-0.271900   | 0  | -7.232232  | -0.829845 | -6.270877 | L |
| H-H1-0.069800  | 0  | -7.743121  | -2.408398 | -7.886068 | L |
| H-H1-0.069800  | 0  | -9.428188  | -2.294599 | -7.361426 | L |
| N-N--0.415700  | 0  | -7.238816  | -4.143184 | -5.709509 | L |
| C-CT--0.025200 | -1 | -7.015821  | -5.407805 | -5.020594 | L |
| C-C-0.597300   | 0  | -7.950299  | -5.668421 | -3.850497 | L |
| O-O--0.567900  | 0  | -8.292146  | -6.819652 | -3.584921 | L |
| H-H-0.271900   | 0  | -6.527061  | -3.417871 | -5.634464 | L |
| H-H1-0.069800  | 0  | -5.993319  | -5.424225 | -4.644889 | L |
| H-H1-0.069800  | 0  | -7.131642  | -6.224668 | -5.733007 | L |
| N-N--0.415700  | 0  | -8.332891  | -4.612129 | -3.136505 | L |
| C-CT--0.038900 | -1 | -9.385359  | -4.668905 | -2.119670 | L |
| C-C-0.597300   | 0  | -10.755380 | -4.960257 | -2.723131 | L |
| O-O--0.567900  | 0  | -11.498633 | -5.797891 | -2.211201 | L |
| C-CT-0.365400  | 0  | -9.421888  | -3.367478 | -1.304180 | L |
| O-OH--0.676100 | 0  | -8.187700  | -3.205767 | -0.643843 | L |
| C-CT--0.243800 | 0  | -10.511998 | -3.375669 | -0.232787 | L |
| H-H-0.271900   | 0  | -7.935985  | -3.709260 | -3.374346 | L |
| H-H1-0.100700  | 0  | -9.159477  | -5.484188 | -1.432510 | L |
| H-H1-0.004300  | 0  | -9.583352  | -2.515461 | -1.964741 | L |
| H-HC-0.064200  | 0  | -11.490472 | -3.266196 | -0.699061 | L |
| H-HC-0.064200  | 0  | -10.356902 | -2.545653 | 0.456075  | L |
| H-HC-0.064200  | 0  | -10.482691 | -4.315029 | 0.317624  | L |
| H-HO-0.410200  | 0  | -7.597106  | -2.738513 | -1.270222 | L |
| N-N--0.415700  | 0  | -11.105233 | -4.249994 | -3.796777 | L |
| C-CT--0.149000 | -1 | -12.337441 | -4.441403 | -4.533764 | L |
| H-H-0.271900   | 0  | -10.439026 | -3.564365 | -4.141966 | L |
| H-H1-0.097600  | 0  | -12.413843 | -3.686811 | -5.317567 | L |
| H-H1-0.097600  | 0  | -13.189669 | -4.358467 | -3.857945 | L |
| H-H1-0.097600  | 0  | -12.334220 | -5.433045 | -4.989297 | L |
| N-N2--0.511415 | 0  | 1.989543   | -0.067750 | -1.687943 | H |
| C-CA-0.057801  | 0  | 0.689001   | 0.232789  | -1.627240 | H |
| C-CA-0.063496  | 0  | -0.021897  | 0.740023  | -2.716390 | H |
| C-CA--0.109122 | 0  | 0.671522   | 0.999465  | -3.895331 | H |
| C-CA--0.164490 | 0  | 2.031666   | 0.712344  | -3.953544 | H |
| C-CA-0.098392  | 0  | 2.646264   | 0.157348  | -2.837619 | H |

|                |   |           |           |           |   |
|----------------|---|-----------|-----------|-----------|---|
| C-C-0.541263   | 0 | -1.523322 | 0.925119  | -2.694925 | H |
| O-O--0.574884  | 0 | -2.085243 | 1.395306  | -3.704080 | H |
| H-H4-0.220889  | 0 | 0.202194  | 0.064355  | -0.673692 | H |
| H-HA-0.160434  | 0 | 0.125797  | 1.399912  | -4.741942 | H |
| H-HA-0.142191  | 0 | 2.611014  | 0.908107  | -4.849361 | H |
| H-H4-0.174502  | 0 | 3.693216  | -0.124031 | -2.851844 | H |
| H-H-0.353801   | 0 | -1.166287 | 2.834457  | -1.462066 | H |
| Zn-ZN-0.974537 | 0 | 2.871618  | -1.109680 | -0.001980 | H |
| O-OW--0.834000 | 0 | -2.139358 | -7.240315 | 3.491682  | L |
| H-HW-0.417000  | 0 | -2.569235 | -6.655750 | 2.847279  | L |
| H-HW-0.417000  | 0 | -2.869676 | -7.778369 | 3.838344  | L |
| O-OW--0.783903 | 0 | 1.319983  | -2.575376 | -0.125144 | H |
| H-HW-0.401253  | 0 | 0.937552  | -2.471439 | 0.781483  | H |
| H-HW-0.424111  | 0 | 1.931991  | -3.354320 | -0.174701 | H |
| O-OW--0.834000 | 0 | -3.708768 | -8.445201 | 7.231759  | L |
| H-HW-0.417000  | 0 | -3.758467 | -7.500663 | 7.399731  | L |
| H-HW-0.417000  | 0 | -3.828457 | -8.519373 | 6.272700  | L |
| O-OW--0.834000 | 0 | 7.183747  | -0.013757 | 1.818749  | L |
| H-HW-0.417000  | 0 | 6.879282  | 0.390527  | 2.651429  | L |
| H-HW-0.417000  | 0 | 6.395808  | 0.086538  | 1.261279  | L |
| O-OW--0.834000 | 0 | 7.044992  | -4.961730 | 4.772212  | L |
| H-HW-0.417000  | 0 | 6.094311  | -5.013468 | 5.001083  | L |
| H-HW-0.417000  | 0 | 7.241453  | -5.842320 | 4.450383  | L |
| O-OW--0.834000 | 0 | 8.634622  | -0.931453 | -0.237265 | L |
| H-HW-0.417000  | 0 | 8.170506  | -0.560477 | 0.540765  | L |
| H-HW-0.417000  | 0 | 8.844442  | -0.140059 | -0.754097 | L |
| O-OW--0.834000 | 0 | 12.663366 | -1.084254 | -1.989766 | L |
| H-HW-0.417000  | 0 | 11.814883 | -0.830874 | -2.392330 | L |
| H-HW-0.417000  | 0 | 12.663216 | -2.047988 | -2.095847 | L |
| O-OW--0.834000 | 0 | 8.282143  | -3.305836 | 0.993525  | L |
| H-HW-0.417000  | 0 | 8.493061  | -2.534782 | 0.426750  | L |
| H-HW-0.417000  | 0 | 7.550154  | -2.972062 | 1.522635  | L |
| O-OW--0.834000 | 0 | 4.355104  | -4.906425 | 5.170371  | L |
| H-HW-0.417000  | 0 | 4.086391  | -4.523048 | 6.028220  | L |
| H-HW-0.417000  | 0 | 4.040607  | -4.245143 | 4.543355  | L |
| S-SH--0.326142 | 0 | -2.246507 | -0.607442 | -1.869454 | H |
| O-OW--0.834000 | 0 | -1.733625 | 2.049715  | -1.357269 | H |

**PC<sub>a</sub>**

|                |    |            |          |           |   |
|----------------|----|------------|----------|-----------|---|
| C-CT--0.3662   | -1 | -10.306290 | 3.912184 | 4.022624  | L |
| C-C-0.5972     | 0  | -8.979366  | 3.253767 | 3.780943  | L |
| O-O--0.5679    | 0  | -8.418707  | 2.662423 | 4.695814  | L |
| H-HC-0.1123    | 0  | -11.047659 | 3.464822 | 3.363534  | L |
| H-HC-0.1123    | 0  | -10.217308 | 4.976017 | 3.809510  | L |
| H-HC-0.1123    | 0  | -10.594269 | 3.763664 | 5.060919  | L |
| N-N--0.415700  | 0  | -8.504957  | 3.360360 | 2.547347  | L |
| C-CT--0.059700 | -1 | -7.339685  | 2.642009 | 2.023926  | L |
| C-C-0.597300   | 0  | -6.186208  | 3.617088 | 1.840365  | L |
| O-O--0.567900  | 0  | -6.323806  | 4.592316 | 1.107538  | L |
| C-CT-0.130300  | 0  | -7.716642  | 1.928899 | 0.701654  | L |
| C-CT--0.043000 | 0  | -8.845433  | 0.893797 | 0.936992  | L |
| C-CT--0.320400 | 0  | -6.491538  | 1.239196 | 0.080228  | L |
| C-CT--0.066000 | 0  | -9.428752  | 0.299040 | -0.349897 | L |
| H-H-0.271900   | 0  | -9.033422  | 3.937513 | 1.901741  | L |



|                |    |            |           |           |           |
|----------------|----|------------|-----------|-----------|-----------|
| H-H1-0.086900  | 0  | -7.028709  | 1.879676  | 2.737940  | L         |
| H-HC-0.018700  | 0  | -8.077195  | 2.679581  | -0.004086 | L         |
| H-HC-0.023600  | 0  | -9.673436  | 1.368413  | 1.462209  | L         |
| H-HC-0.023600  | 0  | -8.472404  | 0.083380  | 1.564685  | L         |
| H-HC-0.088200  | 0  | -6.083256  | 0.493824  | 0.763789  | L         |
| H-HC-0.088200  | 0  | -5.715428  | 1.971125  | -0.149842 | L         |
| H-HC-0.088200  | 0  | -6.760173  | 0.765350  | -0.861430 | L         |
| H-HC-0.018600  | 0  | -9.708003  | 1.097221  | -1.037183 | L         |
| H-HC-0.018600  | 0  | -10.318980 | -0.279467 | -0.106425 | L         |
| H-HC-0.018600  | 0  | -8.703408  | -0.361892 | -0.821734 | L         |
| N-N--0.516300  | 0  | -5.083745  | 3.357184  | 2.538492  | L         |
| C-CT-0.038100  | -1 | -3.773508  | 3.977631  | 2.382609  | L H-HC 30 |
| C-C-0.536600   | 0  | -3.706015  | 5.495448  | 2.113025  | L         |
| O-O--0.581900  | 0  | -2.738934  | 6.024171  | 1.566997  | L         |
| C-CT--0.547145 | 0  | -3.020636  | 3.137721  | 1.319361  | H         |
| C-C-0.532653   | 0  | -2.520053  | 1.828011  | 1.877301  | H         |
| O-O2--0.588507 | 0  | -2.589272  | 1.560474  | 3.062004  | H         |
| O-O2--0.625559 | 0  | -1.873102  | 0.971892  | 1.074761  | H         |
| H-H-0.293600   | 0  | -5.064112  | 2.496129  | 3.071411  | L         |
| H-H1-0.088000  | 0  | -3.241908  | 3.860071  | 3.327239  | L         |
| H-HC-0.128435  | 0  | -2.126139  | 3.687271  | 0.987886  | H         |
| H-HC-0.183556  | 0  | -3.628609  | 3.027439  | 0.416469  | H         |
| N-N--0.415700  | 0  | -4.670022  | 6.250623  | 2.623556  | L         |
| C-CT--0.025200 | -1 | -4.650727  | 7.695968  | 2.502133  | L         |
| C-C-0.597300   | 0  | -3.749515  | 8.334782  | 3.542135  | L         |
| O-O--0.567900  | 0  | -4.224017  | 9.004066  | 4.461516  | L         |
| H-H-0.271900   | 0  | -5.479119  | 5.751460  | 2.956880  | L         |
| H-H1-0.069800  | 0  | -5.661433  | 8.077794  | 2.637663  | L         |
| H-H1-0.069800  | 0  | -4.307764  | 7.984124  | 1.507094  | L         |
| N-N--0.415700  | 0  | -2.446650  | 8.115921  | 3.395647  | L         |
| C-CT--0.038900 | -1 | -1.426765  | 8.561336  | 4.338840  | L         |
| C-C-0.597300   | 0  | -0.520791  | 9.644478  | 3.741365  | L         |
| O-O--0.567900  | 0  | -0.624088  | 10.014572 | 2.570773  | L         |
| C-CT-0.365400  | 0  | -0.581016  | 7.411329  | 4.932150  | L         |
| O-OH--0.676100 | 0  | 0.615735   | 7.246885  | 4.213413  | L         |
| C-CT--0.243800 | 0  | -1.290316  | 6.064521  | 5.041654  | L         |
| H-H-0.271900   | 0  | -2.183545  | 7.518201  | 2.613839  | L         |
| H-H1-0.100700  | 0  | -1.935177  | 9.023751  | 5.182850  | L         |
| H-H1-0.004300  | 0  | -0.299433  | 7.710461  | 5.942323  | L         |
| H-HC-0.064200  | 0  | -2.229257  | 6.187260  | 5.579263  | L         |
| H-HC-0.064200  | 0  | -0.654844  | 5.367963  | 5.583528  | L         |
| H-HC-0.064200  | 0  | -1.488188  | 5.655400  | 4.051077  | L         |
| H-HO-0.410200  | 0  | 1.108953   | 6.489704  | 4.597470  | L         |
| N-N--0.415700  | 0  | 0.397772   | 10.156924 | 4.564457  | L         |
| C-CT--0.025200 | -1 | 1.440059   | 11.089011 | 4.148011  | L         |
| C-C-0.597300   | 0  | 2.339332   | 10.597240 | 3.023014  | L         |
| O-O--0.567900  | 0  | 2.673172   | 11.372594 | 2.131929  | L         |
| H-H-0.271900   | 0  | 0.464616   | 9.748297  | 5.481259  | L         |
| H-H1-0.069800  | 0  | 2.076152   | 11.321893 | 5.000793  | L         |
| H-H1-0.069800  | 0  | 0.969715   | 12.013618 | 3.812791  | L         |
| N-N--0.516300  | 0  | 2.735870   | 9.328216  | 3.080752  | L         |
| C-CT-0.038100  | -1 | 3.645268   | 8.730659  | 2.103866  | L         |
| C-C-0.536600   | 0  | 3.016368   | 8.443798  | 0.753964  | L         |
| O-O--0.581900  | 0  | 3.750786   | 8.160686  | -0.185959 | L         |

|                |    |           |           |           |   |
|----------------|----|-----------|-----------|-----------|---|
| C-CT--0.030300 | 0  | 4.231322  | 7.417423  | 2.653392  | L |
| C-C-0.799400   | -1 | 5.577159  | 7.620206  | 3.332003  | L |
| O-O2--0.801400 | -1 | 6.157024  | 8.724458  | 3.248168  | L |
| O-O2--0.801400 | -1 | 6.037865  | 6.667997  | 3.994022  | L |
| H-H-0.293600   | 0  | 2.362446  | 8.721921  | 3.797458  | L |
| H-H1-0.088000  | 0  | 4.447379  | 9.438178  | 1.891280  | L |
| H-HC--0.012200 | 0  | 4.389752  | 6.704937  | 1.842083  | L |
| H-HC--0.012200 | 0  | 3.528500  | 6.958379  | 3.351787  | L |
| N-N--0.415700  | 0  | 1.693749  | 8.519862  | 0.643010  | L |
| C-CT--0.002400 | -1 | 0.973328  | 8.315219  | -0.606581 | L |
| C-C-0.597300   | 0  | 0.383646  | 9.610304  | -1.166163 | L |
| O-O--0.567900  | 0  | 0.366493  | 9.819254  | -2.379380 | L |
| C-CT--0.034300 | 0  | -0.104061 | 7.238841  | -0.420738 | L |
| C-CA-0.011800  | 0  | 0.413199  | 5.915706  | 0.118778  | L |
| C-CA--0.125600 | 0  | 1.038881  | 4.982840  | -0.728201 | L |
| C-CA--0.125600 | 0  | 0.235196  | 5.602195  | 1.476188  | L |
| C-CA--0.170400 | 0  | 1.464711  | 3.744053  | -0.213460 | L |
| C-CA--0.170400 | 0  | 0.640351  | 4.360086  | 1.989098  | L |
| C-CA--0.107200 | 0  | 1.249328  | 3.427213  | 1.137451  | L |
| H-H-0.271900   | 0  | 1.173890  | 8.704616  | 1.488112  | L |
| H-H1-0.097800  | 0  | 1.658704  | 7.938279  | -1.364965 | L |
| H-HC-0.029500  | 0  | -0.581314 | 7.052174  | -1.383928 | L |
| H-HC-0.029500  | 0  | -0.873729 | 7.621166  | 0.251433  | L |
| H-HA-0.133000  | 0  | 1.151187  | 5.197661  | -1.779523 | L |
| H-HA-0.133000  | 0  | -0.274243 | 6.304846  | 2.109547  | L |
| H-HA-0.143000  | 0  | 1.907376  | 3.005043  | -0.861619 | L |
| H-HA-0.143000  | 0  | 0.438720  | 4.106042  | 3.018405  | L |
| H-HA-0.129700  | 0  | 1.512171  | 2.450826  | 1.509569  | L |
| N-N--0.4157    | 0  | -0.071113 | 10.506610 | -0.287891 | L |
| C-CT--0.1490   | -1 | -0.476354 | 11.848685 | -0.653537 | L |
| H-H-0.2719     | 0  | -0.064974 | 10.246263 | 0.693082  | L |
| H-H1-0.0976    | 0  | -0.864257 | 12.364300 | 0.225419  | L |
| H-H1-0.0976    | 0  | -1.250675 | 11.800448 | -1.420971 | L |
| H-H1-0.0976    | 0  | 0.383959  | 12.393414 | -1.045213 | L |
| C-CT--0.3662   | -1 | 7.983740  | 8.433337  | -0.178728 | L |
| C-C-0.5972     | 0  | 7.522531  | 7.637275  | -1.377057 | L |
| O-O--0.5679    | 0  | 8.343663  | 7.292844  | -2.223661 | L |
| H-HC-0.1123    | 0  | 7.516479  | 9.415537  | -0.194734 | L |
| H-HC-0.1123    | 0  | 9.066164  | 8.533095  | -0.208994 | L |
| H-HC-0.1123    | 0  | 7.696052  | 7.910094  | 0.734070  | L |
| N-N--0.415700  | 0  | 6.213528  | 7.386573  | -1.470647 | L |
| C-CT--0.051800 | -1 | 5.560604  | 6.852489  | -2.673573 | L |
| C-C-0.597300   | 0  | 4.920194  | 7.976640  | -3.488406 | L |
| O-O--0.567900  | 0  | 5.307088  | 8.245331  | -4.626210 | L |
| C-CT--0.110200 | 0  | 4.614093  | 5.679929  | -2.328400 | L |
| C-CT-0.353100  | 0  | 4.557642  | 4.616704  | -3.446500 | L |
| C-CT--0.412100 | 0  | 3.762197  | 3.393595  | -3.003596 | L |
| C-CT--0.412100 | 0  | 3.912802  | 5.112555  | -4.743302 | L |
| H-H-0.271900   | 0  | 5.609327  | 7.706959  | -0.720948 | L |
| H-H1-0.092200  | 0  | 6.346314  | 6.443673  | -3.310076 | L |
| H-HC-0.045700  | 0  | 3.611404  | 6.046930  | -2.106983 | L |
| H-HC-0.045700  | 0  | 4.990043  | 5.188900  | -1.430606 | L |
| H-HC--0.036100 | 0  | 5.573587  | 4.286016  | -3.667304 | L |
| H-HC-0.100000  | 0  | 2.704899  | 3.643013  | -2.919045 | L |

|                |    |           |           |           |            |
|----------------|----|-----------|-----------|-----------|------------|
| H-HC-0.100000  | 0  | 4.123157  | 3.038162  | -2.040054 | L          |
| H-HC-0.100000  | 0  | 3.881093  | 2.594906  | -3.732985 | L          |
| H-HC-0.100000  | 0  | 2.936747  | 5.549601  | -4.528839 | L          |
| H-HC-0.100000  | 0  | 3.788023  | 4.282383  | -5.437518 | L          |
| H-HC-0.100000  | 0  | 4.548790  | 5.857466  | -5.216729 | L          |
| N-N--0.4157    | 0  | 3.970424  | 8.658260  | -2.861938 | L          |
| C-CT--0.1490   | -1 | 3.351811  | 9.881040  | -3.304115 | L          |
| H-H-0.2719     | 0  | 3.770831  | 8.343273  | -1.919723 | L          |
| H-H1-0.0976    | 0  | 4.064709  | 10.476130 | -3.876227 | L          |
| H-H1-0.0976    | 0  | 3.013373  | 10.454027 | -2.439581 | L          |
| H-H1-0.0976    | 0  | 2.491361  | 9.647564  | -3.933341 | L          |
| C-CT--0.3662   | -1 | -8.716392 | 2.374803  | 8.131688  | L          |
| C-C-0.5972     | 0  | -7.869055 | 1.146969  | 7.954278  | L          |
| O-O--0.5679    | 0  | -7.577796 | 0.450254  | 8.919886  | L          |
| H-HC-0.1123    | 0  | -9.621064 | 2.268768  | 7.536055  | L          |
| H-HC-0.1123    | 0  | -8.153850 | 3.244195  | 7.794914  | L          |
| H-HC-0.1123    | 0  | -8.972059 | 2.482386  | 9.183602  | L          |
| N-N--0.415700  | 0  | -7.465811 | 0.901345  | 6.716344  | L          |
| C-CT--0.038900 | -1 | -6.655043 | -0.244659 | 6.302083  | L          |
| C-C-0.597300   | 0  | -5.398643 | 0.258150  | 5.614858  | L          |
| O-O--0.567900  | 0  | -5.459484 | 0.720352  | 4.476500  | L          |
| C-CT-0.365400  | 0  | -7.453642 | -1.220141 | 5.424189  | L          |
| O-OH--0.676100 | 0  | -8.015851 | -0.565738 | 4.312715  | L          |
| C-CT--0.243800 | 0  | -8.595761 | -1.851421 | 6.225879  | L          |
| H-H-0.271900   | 0  | -7.776809 | 1.533786  | 5.982817  | L          |
| H-H1-0.100700  | 0  | -6.344792 | -0.802236 | 7.185417  | L          |
| H-H1-0.004300  | 0  | -6.787943 | -2.010098 | 5.074767  | L          |
| H-HC-0.064200  | 0  | -8.191918 | -2.375468 | 7.091752  | L          |
| H-HC-0.064200  | 0  | -9.141535 | -2.558075 | 5.607366  | L          |
| H-HC-0.064200  | 0  | -9.291379 | -1.082025 | 6.559256  | L          |
| H-HO-0.410200  | 0  | -7.337237 | 0.041303  | 3.981759  | L          |
| N-N--0.415700  | 0  | -4.297730 | 0.231278  | 6.370581  | L          |
| C-CT--0.059700 | -1 | -3.102476 | 1.051852  | 6.161887  | L          |
| C-C-0.597300   | 0  | -1.858248 | 0.169923  | 6.088979  | L          |
| O-O--0.567900  | 0  | -1.609280 | -0.637496 | 6.990376  | L          |
| C-CT-0.130300  | 0  | -2.980872 | 2.112890  | 7.280869  | L          |
| C-CT--0.043000 | 0  | -4.239424 | 3.000254  | 7.452505  | L          |
| C-CT--0.320400 | 0  | -1.745205 | 2.996610  | 7.051841  | L          |
| C-CT--0.066000 | 0  | -4.666488 | 3.808986  | 6.218151  | L          |
| H-H-0.271900   | 0  | -4.350454 | -0.235536 | 7.260741  | L          |
| H-H1-0.086900  | 0  | -3.210217 | 1.590717  | 5.229059  | L          |
| H-HC-0.018700  | 0  | -2.833736 | 1.588570  | 8.226981  | L          |
| H-HC-0.023600  | 0  | -4.059412 | 3.700361  | 8.269033  | L          |
| H-HC-0.023600  | 0  | -5.077537 | 2.374626  | 7.758257  | L          |
| H-HC-0.088200  | 0  | -1.746339 | 3.371088  | 6.027745  | L          |
| H-HC-0.088200  | 0  | -0.840623 | 2.406765  | 7.201289  | L          |
| H-HC-0.088200  | 0  | -1.734726 | 3.830403  | 7.752386  | L          |
| H-HC-0.018600  | 0  | -3.868934 | 4.481792  | 5.908065  | L          |
| H-HC-0.018600  | 0  | -5.548675 | 4.400521  | 6.463088  | L          |
| H-HC-0.018600  | 0  | -4.915953 | 3.144375  | 5.394081  | L          |
| N-N--0.516300  | 0  | -1.099517 | 0.348546  | 5.013915  | L          |
| C-CT-0.038100  | -1 | 0.192911  | -0.235042 | 4.725743  | L H-HC 178 |
| C-C-0.536600   | 0  | 1.123865  | -0.083646 | 5.934424  | L          |
| O-O--0.581900  | 0  | 1.328762  | 1.006160  | 6.463846  | L          |

|                |    |           |            |           |            |
|----------------|----|-----------|------------|-----------|------------|
| C-CT--0.520019 | 0  | 0.713193  | 0.423815   | 3.434708  | H          |
| C-C-0.636404   | 0  | 0.940021  | -0.508747  | 2.253301  | H          |
| O-O2--0.608036 | 0  | 0.331217  | -1.615688  | 2.166330  | H          |
| O-O2--0.608131 | 0  | 1.768959  | -0.055941  | 1.398892  | H          |
| H-H-0.293600   | 0  | -1.484780 | 0.950704   | 4.292358  | L          |
| H-H1-0.088000  | 0  | 0.041522  | -1.301735  | 4.553924  | L          |
| H-HC-0.132300  | 0  | 1.666856  | 0.914504   | 3.645350  | H          |
| H-HC-0.188993  | 0  | 0.028333  | 1.211004   | 3.107079  | H          |
| N-N--0.415700  | 0  | 1.676441  | -1.193320  | 6.391558  | L          |
| C-CT-0.033700  | -1 | 2.579692  | -1.232703  | 7.519210  | L          |
| C-C-0.597300   | 0  | 3.802821  | -2.052646  | 7.124290  | L          |
| O-O--0.567900  | 0  | 3.858125  | -3.276528  | 7.290364  | L          |
| C-CT--0.182500 | 0  | 1.826823  | -1.786431  | 8.737234  | L          |
| H-H-0.271900   | 0  | 1.378100  | -2.070992  | 5.981041  | L          |
| H-H1-0.082300  | 0  | 2.923472  | -0.226050  | 7.764879  | L          |
| H-HC-0.060300  | 0  | 0.985975  | -1.132117  | 8.970836  | L          |
| H-HC-0.060300  | 0  | 2.499241  | -1.830808  | 9.593595  | L          |
| H-HC-0.060300  | 0  | 1.451861  | -2.787671  | 8.519131  | L          |
| N-N--0.4157    | 0  | 4.769777  | -1.359207  | 6.536071  | L          |
| C-CT-0.0188    | -1 | 5.974396  | -1.940996  | 5.988444  | L H-HC 200 |
| C-C-0.5973     | 0  | 7.172465  | -1.792326  | 6.935435  | L          |
| O-O--0.5679    | 0  | 7.218827  | -0.946114  | 7.830850  | L          |
| C-CT--0.517456 | 0  | 6.221795  | -1.299796  | 4.620195  | H          |
| C-CM-0.287351  | 0  | 5.331873  | -1.758176  | 3.522879  | H          |
| N-N2--0.586994 | 0  | 5.451505  | -3.013558  | 2.943499  | H          |
| C-CM--0.020338 | 0  | 4.357005  | -1.134207  | 2.793750  | H          |
| C-CM-0.242458  | 0  | 4.578614  | -3.088363  | 1.903899  | H          |
| N-N2--0.505070 | 0  | 3.904961  | -1.959301  | 1.783548  | H          |
| H-H-0.2719     | 0  | 4.658847  | -0.351234  | 6.466366  | L          |
| H-H1-0.0881    | 0  | 5.827692  | -3.006940  | 5.846348  | L          |
| H-HC-0.166355  | 0  | 7.271007  | -1.480204  | 4.343456  | H          |
| H-HC-0.174481  | 0  | 6.128012  | -0.220346  | 4.763837  | H          |
| H-H-0.335795   | 0  | 6.096645  | -3.737137  | 3.252498  | H          |
| H-H4-0.152777  | 0  | 3.973422  | -0.132933  | 2.920695  | H          |
| H-H5-0.209475  | 0  | 4.465101  | -3.951718  | 1.263037  | H          |
| N-N--0.4157    | 0  | 8.178807  | -2.627868  | 6.685462  | L          |
| C-CT--0.1490   | -1 | 9.446775  | -2.557514  | 7.378731  | L          |
| H-H-0.2719     | 0  | 8.028216  | -3.302995  | 5.942724  | L          |
| H-H1-0.0976    | 0  | 10.120979 | -3.325747  | 6.999038  | L          |
| H-H1-0.0976    | 0  | 9.287145  | -2.707388  | 8.447898  | L          |
| H-H1-0.0976    | 0  | 9.893125  | -1.573525  | 7.223820  | L          |
| C-CT--0.3662   | -1 | 8.368030  | -9.386184  | 0.929218  | L          |
| C-C-0.5972     | 0  | 8.745843  | -9.161433  | -0.522567 | L          |
| O-O--0.5679    | 0  | 9.779784  | -8.558777  | -0.784036 | L          |
| H-HC-0.1123    | 0  | 8.289607  | -10.451881 | 1.130680  | L          |
| H-HC-0.1123    | 0  | 7.427914  | -8.881048  | 1.143376  | L          |
| H-HC-0.1123    | 0  | 9.146003  | -8.954023  | 1.558495  | L          |
| N-N--0.254800  | 0  | 7.926160  | -9.620562  | -1.484869 | L          |
| C-CT--0.026600 | -1 | 8.166030  | -9.383485  | -2.910634 | L          |
| C-C-0.589600   | 0  | 8.013390  | -7.911208  | -3.292793 | L          |
| O-O--0.574800  | 0  | 8.721285  | -7.416065  | -4.166676 | L          |
| C-CT--0.007000 | 0  | 7.158548  | -10.278354 | -3.640190 | L          |
| C-CT-0.018900  | 0  | 6.000071  | -10.402714 | -2.649246 | L          |
| C-CT-0.019200  | 0  | 6.694382  | -10.372911 | -1.286804 | L          |

|                |    |           |            |           |            |
|----------------|----|-----------|------------|-----------|------------|
| H-H1-0.064100  | 0  | 9.178378  | -9.692972  | -3.173505 | L          |
| H-HC-0.025300  | 0  | 7.602491  | -11.261776 | -3.801951 | L          |
| H-HC-0.025300  | 0  | 6.836088  | -9.849368  | -4.590234 | L          |
| H-HC-0.021300  | 0  | 5.439285  | -11.326268 | -2.795982 | L          |
| H-HC-0.021300  | 0  | 5.341094  | -9.538165  | -2.743583 | L          |
| H-H1-0.039100  | 0  | 6.047716  | -9.897687  | -0.547797 | L          |
| H-H1-0.039100  | 0  | 6.938839  | -11.389305 | -0.975264 | L          |
| N-N--0.516300  | 0  | 7.091794  | -7.214267  | -2.626663 | L          |
| C-CT-0.039700  | -1 | 6.839994  | -5.787898  | -2.803516 | L          |
| C-C-0.536600   | 0  | 8.099473  | -4.922873  | -2.677656 | L          |
| O-O--0.581900  | 0  | 8.273963  | -3.942148  | -3.404418 | L          |
| C-CT-0.056000  | 0  | 5.739386  | -5.339474  | -1.832048 | L H-HC 244 |
| C-CT--0.515956 | 0  | 5.223724  | -3.939494  | -2.189274 | H          |
| C-C-0.587828   | 0  | 4.120134  | -3.405422  | -1.280138 | H          |
| O-O2--0.600319 | 0  | 4.046132  | -2.123381  | -1.252313 | H          |
| O-O2--0.589127 | 0  | 3.371715  | -4.198518  | -0.664354 | H          |
| H-H-0.293600   | 0  | 6.560834  | -7.688065  | -1.915099 | L          |
| H-H1-0.110500  | 0  | 6.465108  | -5.637208  | -3.816251 | L          |
| H-HC--0.017300 | 0  | 6.127678  | -5.339213  | -0.812387 | L          |
| H-HC--0.017300 | 0  | 4.908099  | -6.043830  | -1.892312 | L          |
| H-HC-0.167759  | 0  | 4.832749  | -3.966363  | -3.213642 | H          |
| H-HC-0.135230  | 0  | 6.053192  | -3.223611  | -2.179272 | H          |
| N-N--0.415700  | 0  | 9.009749  | -5.325669  | -1.793546 | L          |
| C-CT--0.024900 | -1 | 10.248993 | -4.624091  | -1.479504 | L          |
| C-C-0.597300   | 0  | 11.270584 | -4.515644  | -2.604767 | L          |
| O-O--0.567900  | 0  | 12.252969 | -3.785648  | -2.471703 | L          |
| C-CT-0.211700  | 0  | 10.890042 | -5.258975  | -0.239266 | L          |
| O-OH--0.654600 | 0  | 9.933616  | -5.450746  | 0.792651  | L          |
| H-H-0.271900   | 0  | 8.798602  | -6.130956  | -1.220727 | L          |
| H-H1-0.084300  | 0  | 9.982589  | -3.599706  | -1.214483 | L          |
| H-H1-0.035200  | 0  | 11.688087 | -4.609811  | 0.123989  | L          |
| H-H1-0.035200  | 0  | 11.317725 | -6.226376  | -0.506863 | L          |
| H-HO-0.427500  | 0  | 9.385710  | -4.638216  | 0.876131  | L          |
| N-N--0.415700  | 0  | 11.029199 | -5.199465  | -3.721410 | L          |
| C-CT-0.033700  | -1 | 11.778681 | -5.037391  | -4.960448 | L          |
| C-C-0.597300   | 0  | 10.945173 | -4.483908  | -6.120964 | L          |
| O-O--0.567900  | 0  | 11.377048 | -4.499039  | -7.272891 | L          |
| C-CT--0.182500 | 0  | 12.407717 | -6.398356  | -5.292581 | L          |
| H-H-0.271900   | 0  | 10.213164 | -5.800891  | -3.728716 | L          |
| H-H1-0.082300  | 0  | 12.593183 | -4.328030  | -4.807612 | L          |
| H-HC-0.060300  | 0  | 13.024513 | -6.733891  | -4.458142 | L          |
| H-HC-0.060300  | 0  | 13.033898 | -6.307667  | -6.180796 | L          |
| H-HC-0.060300  | 0  | 11.622705 | -7.132439  | -5.481208 | L          |
| N-N--0.415700  | 0  | 9.765994  | -3.965388  | -5.795871 | L          |
| C-CT--0.025200 | -1 | 8.861528  | -3.284263  | -6.699239 | L          |
| C-C-0.597300   | 0  | 8.813922  | -1.780085  | -6.480609 | L          |
| O-O--0.567900  | 0  | 8.832811  | -1.008569  | -7.436861 | L          |
| H-H-0.271900   | 0  | 9.488306  | -4.019898  | -4.822080 | L          |
| H-H1-0.069800  | 0  | 7.855011  | -3.675592  | -6.554423 | L          |
| H-H1-0.069800  | 0  | 9.150491  | -3.468595  | -7.734403 | L          |
| N-N--0.415700  | 0  | 8.751897  | -1.372955  | -5.215923 | L          |
| C-CT--0.002400 | -1 | 8.579584  | 0.012685   | -4.796493 | L          |
| C-C-0.597300   | 0  | 9.696198  | 0.447885   | -3.840572 | L          |
| O-O--0.567900  | 0  | 10.322461 | -0.402993  | -3.199824 | L          |

|                |    |           |           |           |            |
|----------------|----|-----------|-----------|-----------|------------|
| C-CT--0.034300 | 0  | 7.192734  | 0.135519  | -4.138855 | L          |
| C-CA-0.011800  | 0  | 6.046826  | -0.123186 | -5.099814 | L          |
| C-CA--0.125600 | 0  | 5.626391  | 0.888077  | -5.984635 | L          |
| C-CA--0.125600 | 0  | 5.431583  | -1.388473 | -5.145245 | L          |
| C-CA--0.170400 | 0  | 4.608976  | 0.629964  | -6.921251 | L          |
| C-CA--0.170400 | 0  | 4.410217  | -1.644593 | -6.077208 | L          |
| C-CA--0.107200 | 0  | 4.005151  | -0.639158 | -6.972538 | L          |
| H-H-0.271900   | 0  | 8.752876  | -2.079417 | -4.489657 | L          |
| H-H1-0.097800  | 0  | 8.607926  | 0.662428  | -5.671379 | L          |
| H-HC-0.029500  | 0  | 7.067718  | 1.131963  | -3.716049 | L          |
| H-HC-0.029500  | 0  | 7.134899  | -0.571801 | -3.309854 | L          |
| H-HA-0.133000  | 0  | 6.090674  | 1.863113  | -5.953612 | L          |
| H-HA-0.133000  | 0  | 5.752410  | -2.168667 | -4.470871 | L          |
| H-HA-0.143000  | 0  | 4.288375  | 1.408813  | -7.598505 | L          |
| H-HA-0.143000  | 0  | 3.934292  | -2.614005 | -6.104153 | L          |
| H-HA-0.129700  | 0  | 3.216047  | -0.836057 | -7.684856 | L          |
| N-N--0.254800  | 0  | 9.953267  | 1.761400  | -3.698615 | L          |
| C-CT--0.026600 | -1 | 10.818058 | 2.256730  | -2.634231 | L          |
| C-C-0.589600   | 0  | 10.183408 | 2.012381  | -1.256228 | L          |
| O-O--0.574800  | 0  | 8.989096  | 1.706501  | -1.176272 | L          |
| C-CT--0.007000 | 0  | 10.979016 | 3.755523  | -2.920739 | L          |
| C-CT-0.018900  | 0  | 9.660884  | 4.124664  | -3.599160 | L          |
| C-CT-0.019200  | 0  | 9.347244  | 2.875334  | -4.422276 | L          |
| H-H1-0.064100  | 0  | 11.786874 | 1.761387  | -2.689194 | L          |
| H-HC-0.025300  | 0  | 11.802440 | 3.905965  | -3.620383 | L          |
| H-HC-0.025300  | 0  | 11.139826 | 4.341763  | -2.014659 | L          |
| H-HC-0.021300  | 0  | 9.758587  | 5.011702  | -4.225803 | L          |
| H-HC-0.021300  | 0  | 8.886228  | 4.273052  | -2.844110 | L          |
| H-H1-0.039100  | 0  | 8.268459  | 2.767435  | -4.525343 | L          |
| H-H1-0.039100  | 0  | 9.809465  | 2.958459  | -5.406712 | L          |
| N-N--0.254800  | 0  | 10.950204 | 2.128733  | -0.161644 | L          |
| C-CT--0.026600 | -1 | 10.398719 | 2.116525  | 1.186167  | L          |
| C-C-0.589600   | 0  | 9.348121  | 3.201526  | 1.423237  | L          |
| O-O--0.574800  | 0  | 9.614276  | 4.382363  | 1.211135  | L          |
| C-CT--0.007000 | 0  | 11.599837 | 2.297599  | 2.125245  | L          |
| C-CT-0.018900  | 0  | 12.784964 | 1.809940  | 1.295578  | L          |
| C-CT-0.019200  | 0  | 12.400275 | 2.229262  | -0.120310 | L          |
| H-H1-0.064100  | 0  | 9.956903  | 1.135382  | 1.366057  | L          |
| H-HC-0.025300  | 0  | 11.483072 | 1.717162  | 3.040980  | L          |
| H-HC-0.025300  | 0  | 11.744690 | 3.353037  | 2.363090  | L          |
| H-HC-0.021300  | 0  | 12.847803 | 0.721709  | 1.349080  | L          |
| H-HC-0.021300  | 0  | 13.721638 | 2.268093  | 1.614001  | L          |
| H-H1-0.039100  | 0  | 12.698744 | 3.263522  | -0.296826 | L          |
| H-H1-0.039100  | 0  | 12.875081 | 1.563492  | -0.841808 | L          |
| N-N--0.4157    | 0  | 8.176879  | 2.776140  | 1.886901  | L          |
| C-CT-0.0188    | -1 | 7.021665  | 3.605737  | 2.184360  | L H-HC 334 |
| C-C-0.5973     | 0  | 6.156611  | 3.012907  | 3.294114  | L          |
| O-O--0.5679    | 0  | 6.179781  | 1.804282  | 3.525625  | L          |
| C-CT--0.515368 | 0  | 6.203063  | 3.729779  | 0.870827  | H          |
| C-CM-0.287903  | 0  | 5.599000  | 2.457228  | 0.354008  | H          |
| N-N2--0.582625 | 0  | 6.214174  | 1.669911  | -0.606757 | H          |
| C-CM--0.036893 | 0  | 4.471988  | 1.744477  | 0.692027  | H          |
| C-CM-0.243454  | 0  | 5.470639  | 0.550616  | -0.802368 | H          |
| N-N2--0.523998 | 0  | 4.408692  | 0.561079  | -0.017705 | H          |

|                |    |           |           |           |        |
|----------------|----|-----------|-----------|-----------|--------|
| H-H-0.2719     | 0  | 8.033993  | 1.779124  | 1.960846  | L      |
| H-H1-0.0881    | 0  | 7.356857  | 4.599071  | 2.497741  | L      |
| H-HC-0.162301  | 0  | 6.862940  | 4.181858  | 0.115838  | H      |
| H-HC-0.188340  | 0  | 5.413499  | 4.469771  | 1.051222  | H      |
| H-H-0.339448   | 0  | 7.125542  | 1.866118  | -1.020685 | H      |
| H-H4-0.185957  | 0  | 3.708065  | 2.005928  | 1.408192  | H      |
| H-H5-0.211295  | 0  | 5.732591  | -0.239352 | -1.490841 | H      |
| N-N--0.415700  | 0  | 5.379885  | 3.874753  | 3.938638  | L      |
| C-CT-0.014300  | -1 | 4.559537  | 3.595288  | 5.108181  | L      |
| C-C-0.597300   | 0  | 5.214396  | 2.645309  | 6.121436  | L      |
| O-O--0.567900  | 0  | 4.693386  | 1.592215  | 6.492921  | L      |
| C-CT--0.204100 | 0  | 3.091710  | 3.349882  | 4.734120  | L      |
| C-C-0.713000   | 0  | 2.199658  | 4.205309  | 5.616947  | L      |
| N-N--0.919100  | 0  | 1.652081  | 3.682548  | 6.678576  | L      |
| O-O--0.593100  | 0  | 2.019178  | 5.391231  | 5.402104  | L      |
| H-H-0.271900   | 0  | 5.510123  | 4.861284  | 3.708083  | L      |
| H-H1-0.104800  | 0  | 4.557706  | 4.553771  | 5.632476  | L      |
| H-HC-0.079700  | 0  | 2.849029  | 2.298547  | 4.847123  | L      |
| H-HC-0.079700  | 0  | 2.911654  | 3.642820  | 3.700456  | L      |
| H-H-0.419600   | 0  | 1.013046  | 4.251857  | 7.189536  | L      |
| H-H-0.419600   | 0  | 1.683880  | 2.667039  | 6.766605  | L      |
| N-N--0.4157    | 0  | 6.401275  | 3.078555  | 6.559622  | L      |
| C-CT--0.1490   | -1 | 7.306895  | 2.339688  | 7.418103  | L      |
| H-H-0.2719     | 0  | 6.711077  | 3.952168  | 6.156796  | L      |
| H-H1-0.0976    | 0  | 8.060475  | 3.006407  | 7.836670  | L      |
| H-H1-0.0976    | 0  | 7.794873  | 1.552206  | 6.840611  | L      |
| H-H1-0.0976    | 0  | 6.747165  | 1.866621  | 8.228057  | L      |
| C-CT--0.3662   | -1 | -2.236532 | -2.732040 | 9.545136  | L      |
| C-C-0.5972     | 0  | -2.345996 | -3.832204 | 8.525954  | L      |
| O-O--0.5679    | 0  | -2.867667 | -4.902206 | 8.829060  | L      |
| H-HC-0.1123    | 0  | -1.186385 | -2.486851 | 9.692110  | L      |
| H-HC-0.1123    | 0  | -2.674342 | -3.068610 | 10.482356 | L      |
| H-HC-0.1123    | 0  | -2.768819 | -1.855224 | 9.181045  | L      |
| N-N--0.347900  | 0  | -1.829461 | -3.570261 | 7.328801  | L      |
| C-CT--0.240000 | -1 | -1.732259 | -4.535956 | 6.228463  | L      |
| C-C-0.734100   | 0  | -0.321282 | -4.573902 | 5.651701  | L      |
| O-O--0.589400  | 0  | 0.507437  | -3.712940 | 5.932316  | L      |
| C-CT--0.009400 | 0  | -2.832271 | -4.234356 | 5.190096  | L      |
| C-CT-0.018700  | 0  | -2.563892 | -2.999769 | 4.318367  | L H-HC |
| C-CT--0.464524 | 0  | -3.724317 | -2.765828 | 3.341875  | H      |
| C-CT--0.195159 | 0  | -3.505156 | -1.638990 | 2.335975  | H      |
| N-N3--0.748751 | 0  | -2.379901 | -1.944576 | 1.391668  | H      |
| H-H-0.274700   | 0  | -1.451442 | -2.636071 | 7.182551  | L      |
| H-H1-0.142600  | 0  | -1.924663 | -5.530715 | 6.630305  | L      |
| H-HC-0.036200  | 0  | -3.781877 | -4.101792 | 5.711618  | L      |
| H-HC-0.036200  | 0  | -2.945291 | -5.092368 | 4.534820  | L      |
| H-HC-0.010300  | 0  | -1.641047 | -3.147210 | 3.757012  | L      |
| H-HC-0.010300  | 0  | -2.459826 | -2.126257 | 4.952426  | L      |
| H-HC-0.173903  | 0  | -4.626784 | -2.546963 | 3.919954  | H      |
| H-HC-0.148535  | 0  | -3.913919 | -3.701033 | 2.793400  | H      |
| H-HP-0.236066  | 0  | -3.296986 | -0.674223 | 2.797704  | H      |
| H-HP-0.172509  | 0  | -4.396481 | -1.540052 | 1.704449  | H      |
| H-H-0.437293   | 0  | -2.526343 | -1.453764 | 0.432388  | H      |
| H-H-0.366736   | 0  | -2.408134 | -2.950027 | 1.177419  | H      |

|                |    |           |           |           |   |
|----------------|----|-----------|-----------|-----------|---|
| H-H-0.419451   | 0  | -1.434969 | -1.704911 | 1.759570  | H |
| N-N--0.415700  | 0  | -0.031322 | -5.598130 | 4.862803  | L |
| C-CT--0.025200 | -1 | 1.288105  | -5.805149 | 4.274743  | L |
| C-C-0.597300   | 0  | 1.162703  | -6.551345 | 2.943998  | L |
| O-O--0.567900  | 0  | 1.706674  | -7.636496 | 2.749473  | L |
| H-H-0.271900   | 0  | -0.780492 | -6.238036 | 4.617873  | L |
| H-H1-0.069800  | 0  | 1.907340  | -6.391635 | 4.953502  | L |
| H-H1-0.069800  | 0  | 1.776783  | -4.848273 | 4.087275  | L |
| N-N--0.415700  | 0  | 0.382690  | -5.954478 | 2.047797  | L |
| C-CT--0.025200 | -1 | -0.224684 | -6.544152 | 0.856437  | L |
| C-C-0.597300   | 0  | -1.318388 | -5.589704 | 0.418897  | L |
| O-O--0.567900  | 0  | -2.120440 | -5.164415 | 1.246810  | L |
| H-H-0.271900   | 0  | -0.021746 | -5.079417 | 2.355728  | L |
| H-H1-0.069800  | 0  | -0.661639 | -7.512177 | 1.100953  | L |
| H-H1-0.069800  | 0  | 0.526761  | -6.653854 | 0.074184  | L |
| N-N--0.4157    | 0  | -1.333538 | -5.219725 | -0.858432 | L |
| C-CT--0.0014   | -1 | -2.153899 | -4.116313 | -1.359174 | L |
| C-C-0.5973     | 0  | -3.632621 | -4.205204 | -0.956842 | L |
| O-O--0.5679    | 0  | -4.244640 | -3.231421 | -0.536809 | L |
| C-CT--0.0152   | 0  | -2.029300 | -4.029643 | -2.892809 | L |
| C-CA--0.0011   | 0  | -0.640380 | -4.263145 | -3.461172 | L |
| C-CA--0.1906   | 0  | 0.387666  | -3.329280 | -3.230335 | L |
| C-CA--0.1906   | 0  | -0.381147 | -5.417941 | -4.227018 | L |
| C-CA--0.2341   | 0  | 1.673146  | -3.551342 | -3.760633 | L |
| C-CA--0.2341   | 0  | 0.902756  | -5.642058 | -4.759626 | L |
| C-C-0.3226     | 0  | 1.934069  | -4.705912 | -4.525809 | L |
| O-OH--0.5579   | 0  | 3.168761  | -4.920453 | -5.053580 | L |
| H-H-0.2719     | 0  | -0.569724 | -5.511199 | -1.451418 | L |
| H-H1-0.0876    | 0  | -1.748160 | -3.192346 | -0.949563 | L |
| H-HC-0.0295    | 0  | -2.357248 | -3.041156 | -3.209691 | L |
| H-HC-0.0295    | 0  | -2.712247 | -4.749673 | -3.344864 | L |
| H-HA-0.1699    | 0  | 0.196051  | -2.432365 | -2.649101 | L |
| H-HA-0.1699    | 0  | -1.176182 | -6.121897 | -4.424605 | L |
| H-HA-0.1656    | 0  | 2.460962  | -2.836170 | -3.580828 | L |
| H-HA-0.1656    | 0  | 1.093604  | -6.519265 | -5.355575 | L |
| H-HO-0.3992    | 0  | 3.176593  | -5.708079 | -5.594383 | L |
| N-N--0.415700  | 0  | -4.206403 | -5.402557 | -1.061856 | L |
| C-CT--0.024900 | -1 | -5.552900 | -5.659039 | -0.569599 | L |
| C-C-0.597300   | 0  | -5.673599 | -5.561208 | 0.948296  | L |
| O-O--0.567900  | 0  | -5.005212 | -6.285782 | 1.695428  | L |
| C-CT-0.211700  | 0  | -6.016556 | -7.055589 | -0.986195 | L |
| O-OH--0.654600 | -1 | -7.272118 | -7.359856 | -0.401829 | L |
| H-H-0.271900   | 0  | -3.618143 | -6.159132 | -1.361154 | L |
| H-H1-0.084300  | 0  | -6.229854 | -4.933743 | -1.021838 | L |
| H-H1-0.035200  | 0  | -5.284413 | -7.791544 | -0.651781 | L |
| H-H1-0.035200  | 0  | -6.093370 | -7.102411 | -2.072672 | L |
| H-HO-0.427500  | -1 | -7.529485 | -8.233205 | -0.707310 | L |
| N-N--0.415700  | 0  | -6.659894 | -4.775078 | 1.373394  | L |
| C-CT-0.033700  | -1 | -7.147828 | -4.677412 | 2.737981  | L |
| C-C-0.597300   | 0  | -7.468419 | -6.011710 | 3.417183  | L |
| O-O--0.567900  | 0  | -7.333075 | -6.136721 | 4.632242  | L |
| C-CT--0.182500 | 0  | -8.362158 | -3.748579 | 2.740788  | L |
| H-H-0.271900   | 0  | -7.130618 | -4.206821 | 0.675252  | L |
| H-H1-0.082300  | 0  | -6.367420 | -4.204875 | 3.335491  | L |



|                |    |            |            |           |   |      |     |
|----------------|----|------------|------------|-----------|---|------|-----|
| H-HC-0.060300  | 0  | -8.097852  | -2.778940  | 2.314461  | L |      |     |
| H-HC-0.060300  | 0  | -8.703702  | -3.607027  | 3.761535  | L |      |     |
| H-HC-0.060300  | 0  | -9.169423  | -4.195450  | 2.166444  | L |      |     |
| N-N--0.415700  | 0  | -7.906090  | -7.004740  | 2.641964  | L |      |     |
| C-CT--0.025200 | -1 | -8.270788  | -8.322593  | 3.148961  | L |      |     |
| C-C-0.597300   | 0  | -7.316797  | -9.438376  | 2.737973  | L |      |     |
| O-O--0.567900  | 0  | -7.742170  | -10.578995 | 2.568658  | L |      |     |
| H-H-0.271900   | 0  | -7.936723  | -6.824593  | 1.645010  | L |      |     |
| H-H1-0.069800  | 0  | -9.261411  | -8.575716  | 2.772351  | L |      |     |
| H-H1-0.069800  | 0  | -8.325840  | -8.314663  | 4.237838  | L |      |     |
| N-N--0.415700  | 0  | -6.024574  | -9.132493  | 2.628276  | L |      |     |
| C-CT--0.024900 | -1 | -4.953955  | -10.130670 | 2.627085  | L |      |     |
| C-C-0.597300   | 0  | -4.241271  | -10.091219 | 3.973361  | L |      |     |
| O-O--0.567900  | 0  | -3.922640  | -9.014088  | 4.486626  | L |      |     |
| C-CT-0.211700  | 0  | -3.973393  | -9.846951  | 1.484884  | L |      |     |
| O-OH--0.654600 | -1 | -3.076083  | -10.932859 | 1.309090  | L |      |     |
| H-H-0.271900   | 0  | -5.767930  | -8.160090  | 2.766786  | L |      |     |
| H-H1-0.084300  | 0  | -5.372155  | -11.125205 | 2.471627  | L |      |     |
| H-H1-0.035200  | 0  | -3.416906  | -8.931335  | 1.692416  | L |      |     |
| H-H1-0.035200  | 0  | -4.539234  | -9.710596  | 0.562468  | L |      |     |
| H-HO-0.427500  | -1 | -2.536361  | -10.745763 | 0.537504  | L |      |     |
| N-N--0.4157    | 0  | -4.038225  | -11.267103 | 4.566982  | L |      |     |
| C-CT--0.1490   | -1 | -3.513659  | -11.409260 | 5.914540  | L |      |     |
| H-H-0.2719     | 0  | -4.312443  | -12.088118 | 4.051352  | L |      |     |
| H-H1-0.0976    | 0  | -3.273119  | -12.452384 | 6.119732  | L |      |     |
| H-H1-0.0976    | 0  | -4.252158  | -11.059566 | 6.639317  | L |      |     |
| H-H1-0.0976    | 0  | -2.609990  | -10.805525 | 6.028196  | L |      |     |
| C-CT--0.3662   | -1 | -12.140566 | 5.068186   | -0.651171 | L |      |     |
| C-C-0.5972     | 0  | -10.714045 | 5.259523   | -0.207357 | L |      |     |
| O-O--0.5679    | 0  | -10.403783 | 5.012887   | 0.952870  | L |      |     |
| H-HC-0.1123    | 0  | -12.532487 | 6.014108   | -1.018317 | L |      |     |
| H-HC-0.1123    | 0  | -12.730518 | 4.731146   | 0.199476  | L |      |     |
| H-HC-0.1123    | 0  | -12.169655 | 4.313288   | -1.434804 | L |      |     |
| N-N--0.415700  | 0  | -9.862279  | 5.688893   | -1.133876 | L |      |     |
| C-CT--0.025200 | -1 | -8.429539  | 5.860694   | -0.908992 | L |      |     |
| C-C-0.597300   | 0  | -7.610806  | 5.690730   | -2.165280 | L |      |     |
| O-O--0.567900  | 0  | -8.129431  | 5.944687   | -3.259956 | L |      |     |
| H-H-0.271900   | 0  | -10.170012 | 5.826181   | -2.084380 | L |      |     |
| H-H1-0.069800  | 0  | -8.117978  | 5.103402   | -0.200469 | L |      |     |
| H-H1-0.069800  | 0  | -8.228060  | 6.844590   | -0.487936 | L |      |     |
| N-N--0.415700  | 0  | -6.343957  | 5.298981   | -1.986213 | L | H-H1 | 489 |
| C-CT--0.530209 | -1 | -5.346938  | 5.283488   | -3.055749 | H |      |     |
| C-C-0.568093   | 0  | -4.446850  | 4.065073   | -2.935940 | H |      |     |
| O-O--0.528105  | 0  | -4.128327  | 3.586310   | -1.827709 | H |      |     |
| C-CT-0.298500  | 0  | -4.519107  | 6.593449   | -3.062241 | L | H-H1 | 489 |
| C-CT--0.319200 | 0  | -5.378336  | 7.793869   | -3.466216 | L |      |     |
| C-CT--0.319200 | 0  | -3.843202  | 6.891291   | -1.719760 | L |      |     |
| H-H-0.271900   | 0  | -6.023234  | 5.057105   | -1.050242 | L |      |     |
| H-H1-0.184096  | 0  | -5.886291  | 5.243295   | -4.007660 | H |      |     |
| H-HC--0.029700 | 0  | -3.736862  | 6.497109   | -3.814387 | L |      |     |
| H-HC-0.079100  | 0  | -6.116098  | 8.002514   | -2.693581 | L |      |     |
| H-HC-0.079100  | 0  | -5.887804  | 7.576774   | -4.403827 | L |      |     |
| H-HC-0.079100  | 0  | -4.739667  | 8.666263   | -3.596883 | L |      |     |
| H-HC-0.079100  | 0  | -4.585532  | 7.025754   | -0.935090 | L |      |     |

|                |    |            |           |            |   |      |     |
|----------------|----|------------|-----------|------------|---|------|-----|
| H-HC-0.079100  | 0  | -3.233160  | 7.789206  | -1.801660  | L |      |     |
| H-HC-0.079100  | 0  | -3.192986  | 6.060137  | -1.441724  | L |      |     |
| N-N--0.610103  | 0  | -3.973457  | 3.548150  | -4.077767  | H |      |     |
| C-CT--0.314060 | -1 | -4.236450  | 3.987420  | -5.431093  | H |      |     |
| C-C-0.597300   | 0  | -5.353324  | 3.164070  | -6.062021  | L | H-H1 | 505 |
| O-O--0.567900  | 0  | -5.487276  | 1.960966  | -5.840192  | L |      |     |
| C-CT--0.110200 | 0  | -2.943832  | 3.892282  | -6.279237  | L | H-H1 | 505 |
| C-CT-0.353100  | 0  | -1.922686  | 5.031677  | -6.047956  | L |      |     |
| C-CT--0.412100 | 0  | -1.090020  | 4.902534  | -4.771989  | L |      |     |
| C-CT--0.412100 | 0  | -0.935730  | 5.078334  | -7.219272  | L |      |     |
| H-H-0.398207   | 0  | -3.390260  | 2.714993  | -3.988252  | H |      |     |
| H-H1-0.165130  | 0  | -4.547715  | 5.031672  | -5.438159  | H |      |     |
| H-HC-0.045700  | 0  | -3.242131  | 3.930739  | -7.326952  | L |      |     |
| H-HC-0.045700  | 0  | -2.461402  | 2.928488  | -6.120085  | L |      |     |
| H-HC--0.036100 | 0  | -2.455233  | 5.983196  | -6.026593  | L |      |     |
| H-HC-0.100000  | 0  | -0.537587  | 3.964666  | -4.776870  | L |      |     |
| H-HC-0.100000  | 0  | -1.740869  | 4.910165  | -3.897820  | L |      |     |
| H-HC-0.100000  | 0  | -0.396315  | 5.736849  | -4.683943  | L |      |     |
| H-HC-0.100000  | 0  | -0.383366  | 4.140713  | -7.269830  | L |      |     |
| H-HC-0.100000  | 0  | -0.235027  | 5.899925  | -7.072150  | L |      |     |
| H-HC-0.100000  | 0  | -1.474711  | 5.236575  | -8.151520  | L |      |     |
| N-N--0.415700  | 0  | -6.139642  | 3.811702  | -6.917238  | L |      |     |
| C-CT--0.038900 | -1 | -7.329512  | 3.213593  | -7.535338  | L |      |     |
| C-C-0.597300   | 0  | -7.084870  | 1.876284  | -8.223761  | L |      |     |
| O-O--0.567900  | 0  | -7.967785  | 1.021933  | -8.269131  | L |      |     |
| C-CT-0.365400  | -1 | -7.968313  | 4.136116  | -8.597814  | L |      |     |
| O-OH--0.676100 | -1 | -7.906820  | 5.494021  | -8.151983  | L |      |     |
| C-CT--0.243800 | 0  | -9.447170  | 3.846313  | -8.854803  | L |      |     |
| H-H-0.271900   | 0  | -6.012931  | 4.808782  | -7.007880  | L |      |     |
| H-H1-0.100700  | 0  | -8.068275  | 3.073789  | -6.753095  | L |      |     |
| H-H1-0.004300  | 0  | -7.414159  | 4.058766  | -9.534259  | L |      |     |
| H-HC-0.064200  | 0  | -9.563557  | 2.842346  | -9.262508  | L |      |     |
| H-HC-0.064200  | 0  | -9.842079  | 4.559962  | -9.577645  | L |      |     |
| H-HC-0.064200  | 0  | -10.009405 | 3.917945  | -7.922943  | L |      |     |
| H-HO-0.410200  | -1 | -8.805143  | 5.828852  | -8.116102  | L |      |     |
| N-N--0.415700  | 0  | -5.908337  | 1.739374  | -8.832103  | L |      |     |
| C-CT--0.025200 | -1 | -5.523289  | 0.582039  | -9.626760  | L |      |     |
| C-C-0.597300   | 0  | -4.627346  | -0.421814 | -8.931994  | L |      |     |
| O-O--0.567900  | 0  | -4.146155  | -1.336394 | -9.601863  | L |      |     |
| H-H-0.271900   | 0  | -5.220610  | 2.452370  | -8.640646  | L |      |     |
| H-H1-0.069800  | 0  | -4.993843  | 0.928554  | -10.513045 | L |      |     |
| H-H1-0.069800  | 0  | -6.412200  | 0.047734  | -9.961932  | L |      |     |
| N-N--0.415700  | 0  | -4.396953  | -0.233387 | -7.627880  | L | H-H1 | 545 |
| C-CT--0.539097 | -1 | -3.476419  | -1.023811 | -6.822361  | H |      |     |
| C-C-0.572106   | 0  | -4.234689  | -1.451256 | -5.567252  | H |      |     |
| O-O--0.533001  | 0  | -5.029880  | -2.382495 | -5.680235  | H |      |     |
| C-CT-0.130300  | 0  | -2.109914  | -0.308700 | -6.651245  | L | H-H1 | 545 |
| C-CT--0.043000 | 0  | -1.491057  | 0.128848  | -8.000897  | L |      |     |
| C-CT--0.320400 | 0  | -1.171513  | -1.288328 | -5.925221  | L |      |     |
| C-CT--0.066000 | 0  | -0.161503  | 0.885394  | -7.879397  | L |      |     |
| H-H-0.271900   | 0  | -4.855031  | 0.541979  | -7.157025  | L |      |     |
| H-H1-0.180646  | 0  | -3.286501  | -1.953369 | -7.370080  | H |      |     |
| H-HC-0.018700  | 0  | -2.251488  | 0.579236  | -6.040212  | L |      |     |
| H-HC-0.023600  | 0  | -2.182149  | 0.803024  | -8.504964  | L |      |     |

|                |    |            |           |           |            |
|----------------|----|------------|-----------|-----------|------------|
| H-HC-0.023600  | 0  | -1.346354  | -0.747001 | -8.634551 | L          |
| H-HC-0.088200  | 0  | -1.031115  | -2.188724 | -6.521496 | L          |
| H-HC-0.088200  | 0  | -1.584861  | -1.562520 | -4.956865 | L          |
| H-HC-0.088200  | 0  | -0.206484  | -0.827581 | -5.733051 | L          |
| H-HC-0.018600  | 0  | -0.276605  | 1.722432  | -7.191583 | L          |
| H-HC-0.018600  | 0  | 0.124093   | 1.269017  | -8.858859 | L          |
| H-HC-0.018600  | 0  | 0.627792   | 0.223537  | -7.524694 | L          |
| N-N--0.611145  | 0  | -4.053057  | -0.725705 | -4.433659 | H          |
| C-CT--0.109296 | -1 | -4.637112  | -1.120445 | -3.158988 | H          |
| C-C-0.597300   | 0  | -6.163693  | -1.169160 | -3.203033 | L H-H1 564 |
| O-O--0.567900  | 0  | -6.792455  | -2.117361 | -2.716553 | L          |
| C-CT--0.388038 | 0  | -4.175913  | -0.259157 | -1.986476 | H          |
| H-H-0.369964   | 0  | -3.273092  | -0.083391 | -4.360333 | H          |
| H-H1-0.178541  | 0  | -4.353724  | -2.153602 | -2.932026 | H          |
| H-H1-0.157964  | 0  | -4.845834  | -0.527497 | -1.161631 | H          |
| H-H1-0.179833  | 0  | -4.349557  | 0.800256  | -2.203744 | H          |
| H-HS-0.319500  | 0  | -2.147207  | 0.904677  | 0.102879  | H          |
| N-N--0.415700  | 0  | -6.755424  | -0.159874 | -3.828404 | L          |
| C-CT--0.087500 | -1 | -8.195185  | -0.083427 | -4.053003 | L          |
| C-C-0.597300   | 0  | -8.696173  | -1.224540 | -4.926543 | L          |
| O-O--0.567900  | 0  | -9.653842  | -1.906555 | -4.560752 | L          |
| C-CT-0.298500  | 0  | -8.589955  | 1.285646  | -4.623722 | L          |
| C-CT--0.319200 | 0  | -10.107733 | 1.425651  | -4.804539 | L          |
| C-CT--0.319200 | 0  | -8.128615  | 2.445838  | -3.728539 | L          |
| H-H-0.271900   | 0  | -6.118992  | 0.530827  | -4.220143 | L          |
| H-H1-0.096900  | 0  | -8.688453  | -0.188735 | -3.089342 | L          |
| H-HC--0.029700 | 0  | -8.119557  | 1.379271  | -5.594101 | L          |
| H-HC-0.079100  | 0  | -10.610310 | 1.270161  | -3.849644 | L          |
| H-HC-0.079100  | 0  | -10.468803 | 0.693857  | -5.526912 | L          |
| H-HC-0.079100  | 0  | -10.342534 | 2.421365  | -5.179721 | L          |
| H-HC-0.079100  | 0  | -8.572972  | 2.366014  | -2.737938 | L          |
| H-HC-0.079100  | 0  | -8.410049  | 3.398629  | -4.175335 | L          |
| H-HC-0.079100  | 0  | -7.042721  | 2.443201  | -3.622567 | L          |
| N-N--0.415700  | 0  | -8.052109  | -1.446713 | -6.070649 | L          |
| C-CT--0.025200 | -1 | -8.407222  | -2.505167 | -7.011660 | L          |
| C-C-0.597300   | 0  | -8.321705  | -3.905812 | -6.418496 | L          |
| O-O--0.567900  | 0  | -9.219915  | -4.722055 | -6.614016 | L          |
| H-H-0.271900   | 0  | -7.235728  | -0.877435 | -6.256868 | L          |
| H-H1-0.069800  | 0  | -7.735031  | -2.456057 | -7.868061 | L          |
| H-H1-0.069800  | 0  | -9.425930  | -2.342788 | -7.363126 | L          |
| N-N--0.415700  | 0  | -7.240098  | -4.179946 | -5.692333 | L          |
| C-CT--0.025200 | -1 | -7.009795  | -5.443989 | -5.004428 | L          |
| C-C-0.597300   | 0  | -7.938381  | -5.707341 | -3.830047 | L          |
| O-O--0.567900  | 0  | -8.267579  | -6.859759 | -3.554420 | L          |
| H-H-0.271900   | 0  | -6.531974  | -3.450635 | -5.623592 | L          |
| H-H1-0.069800  | 0  | -5.985610  | -5.457565 | -4.633421 | L          |
| H-H1-0.069800  | 0  | -7.126811  | -6.261162 | -5.716315 | L          |
| N-N--0.415700  | 0  | -8.328791  | -4.649645 | -3.123248 | L          |
| C-CT--0.038900 | -1 | -9.377419  | -4.702655 | -2.102566 | L          |
| C-C-0.597300   | 0  | -10.749405 | -4.993868 | -2.701247 | L          |
| O-O--0.567900  | 0  | -11.492547 | -5.827154 | -2.182381 | L          |
| C-CT-0.365400  | 0  | -9.409170  | -3.396363 | -1.294990 | L          |
| O-OH--0.676100 | 0  | -8.166536  | -3.223448 | -0.652397 | L          |
| C-CT--0.243800 | 0  | -10.486941 | -3.406033 | -0.211450 | L          |

|                |    |            |           |           |   |
|----------------|----|------------|-----------|-----------|---|
| H-H-0.271900   | 0  | -7.936784  | -3.747002 | -3.371222 | L |
| H-H1-0.100700  | 0  | -9.149787  | -5.515399 | -1.413033 | L |
| H-H1-0.004300  | 0  | -9.583398  | -2.549178 | -1.958640 | L |
| H-HC-0.064200  | 0  | -11.469919 | -3.291103 | -0.666969 | L |
| H-HC-0.064200  | 0  | -10.321743 | -2.580718 | 0.480512  | L |
| H-HC-0.064200  | 0  | -10.455917 | -4.348629 | 0.332941  | L |
| H-HO-0.410200  | 0  | -7.578430  | -2.783339 | -1.299148 | L |
| N-N--0.4157    | 0  | -11.100345 | -4.288931 | -3.778236 | L |
| C-CT--0.1490   | -1 | -12.332538 | -4.485671 | -4.513909 | L |
| H-H-0.2719     | 0  | -10.435824 | -3.604877 | -4.129611 | L |
| H-H1-0.0976    | 0  | -12.411190 | -3.733568 | -5.299934 | L |
| H-H1-0.0976    | 0  | -13.184744 | -4.402771 | -3.838053 | L |
| H-H1-0.0976    | 0  | -12.327157 | -5.478555 | -4.966714 | L |
| N-N2--0.511415 | 0  | 1.935025   | 0.045264  | -1.709328 | H |
| C-CA-0.057801  | 0  | 0.761748   | 0.692050  | -1.669526 | H |
| C-CA-0.063496  | 0  | 0.172197   | 1.235813  | -2.815549 | H |
| C-CA--0.109122 | 0  | 0.846387   | 1.123906  | -4.031056 | H |
| C-CA--0.164490 | 0  | 2.077076   | 0.483424  | -4.064017 | H |
| C-CA-0.098392  | 0  | 2.579339   | -0.051038 | -2.885751 | H |
| C-C-0.541263   | 0  | -1.184888  | 1.849651  | -2.847486 | H |
| O-O--0.574884  | 0  | -1.866666  | 1.754782  | -3.866964 | H |
| H-H4-0.220889  | 0  | 0.273306   | 0.762572  | -0.703839 | H |
| H-HA-0.160434  | 0  | 0.391535   | 1.529594  | -4.926752 | H |
| H-HA-0.142191  | 0  | 2.638562   | 0.393655  | -4.985175 | H |
| H-H4-0.174502  | 0  | 3.517421   | -0.594756 | -2.865613 | H |
| H-H-0.353801   | 0  | -2.467081  | 2.874081  | -1.844701 | H |
| Zn-ZN-0.974537 | 0  | 2.806776   | -1.058897 | -0.020609 | H |
| O-OW--0.834000 | 0  | -2.157943  | -7.210545 | 3.463264  | L |
| H-HW-0.417000  | 0  | -2.651863  | -6.596258 | 2.901014  | L |
| H-HW-0.417000  | 0  | -2.846310  | -7.781831 | 3.842181  | L |
| O-OW--0.783903 | 0  | 1.329919   | -2.561218 | -0.130807 | H |
| H-HW-0.401253  | 0  | 0.929992   | -2.440856 | 0.767715  | H |
| H-HW-0.424111  | 0  | 1.938939   | -3.342242 | -0.161591 | H |
| O-OW--0.834000 | 0  | -3.811182  | -8.461474 | 7.252830  | L |
| H-HW-0.417000  | 0  | -3.819937  | -7.516169 | 7.424248  | L |
| H-HW-0.417000  | 0  | -3.873135  | -8.525399 | 6.288070  | L |
| O-OW--0.834000 | 0  | 7.144788   | -0.007909 | 1.769668  | L |
| H-HW-0.417000  | 0  | 6.843005   | 0.410191  | 2.596878  | L |
| H-HW-0.417000  | 0  | 6.351997   | 0.075309  | 1.215906  | L |
| O-OW--0.834000 | 0  | 7.036436   | -4.943712 | 4.740652  | L |
| H-HW-0.417000  | 0  | 6.087686   | -4.994735 | 4.976571  | L |
| H-HW-0.417000  | 0  | 7.226213   | -5.819143 | 4.401436  | L |
| O-OW--0.834000 | 0  | 8.646113   | -0.915050 | -0.250545 | L |
| H-HW-0.417000  | 0  | 8.153076   | -0.545055 | 0.510411  | L |
| H-HW-0.417000  | 0  | 8.846339   | -0.125851 | -0.774253 | L |
| O-OW--0.834000 | 0  | 12.658699  | -1.076639 | -2.013454 | L |
| H-HW-0.417000  | 0  | 11.800146  | -0.826867 | -2.396396 | L |
| H-HW-0.417000  | 0  | 12.659697  | -2.040571 | -2.117296 | L |
| O-OW--0.834000 | 0  | 8.308704   | -3.285199 | 0.989799  | L |
| H-HW-0.417000  | 0  | 8.519486   | -2.514069 | 0.422719  | L |
| H-HW-0.417000  | 0  | 7.574188   | -2.952090 | 1.515579  | L |
| O-OW--0.834000 | 0  | 4.347378   | -4.876065 | 5.153395  | L |
| H-HW-0.417000  | 0  | 4.085831   | -4.502642 | 6.017819  | L |
| H-HW-0.417000  | 0  | 4.046532   | -4.196837 | 4.538426  | L |

|                |   |           |           |           |   |
|----------------|---|-----------|-----------|-----------|---|
| S-SH--0.326142 | 0 | -2.439684 | -0.557031 | -1.448185 | H |
| O-OW--0.834000 | 0 | -1.511792 | 2.577632  | -1.789161 | H |

**TS4**

|                |    |            |           |           |           |
|----------------|----|------------|-----------|-----------|-----------|
| C-CT--0.366200 | -1 | -10.305510 | 3.904795  | 4.028475  | L         |
| C-C-0.597200   | 0  | -8.980705  | 3.243119  | 3.785691  | L         |
| O-O--0.567900  | 0  | -8.421942  | 2.648792  | 4.699668  | L         |
| H-HC-0.112300  | 0  | -11.048066 | 3.460994  | 3.368331  | L         |
| H-HC-0.112300  | 0  | -10.213265 | 4.968789  | 3.817553  | L         |
| H-HC-0.112300  | 0  | -10.594056 | 3.755014  | 5.066420  | L         |
| N-N--0.415700  | 0  | -8.506506  | 3.351183  | 2.552289  | L         |
| C-CT--0.059700 | -1 | -7.338927  | 2.637417  | 2.027970  | L         |
| C-C-0.597300   | 0  | -6.188774  | 3.617652  | 1.848734  | L         |
| O-O--0.567900  | 0  | -6.333100  | 4.601347  | 1.128386  | L         |
| C-CT-0.130300  | 0  | -7.712748  | 1.928927  | 0.702964  | L         |
| C-CT--0.043000 | 0  | -8.837726  | 0.888907  | 0.934659  | L         |
| C-CT--0.320400 | 0  | -6.484930  | 1.246614  | 0.079622  | L         |
| C-CT--0.066000 | 0  | -9.415915  | 0.293210  | -0.353946 | L         |
| H-H-0.271900   | 0  | -9.033798  | 3.931055  | 1.908249  | L         |
| H-H1-0.086900  | 0  | -7.026122  | 1.873691  | 2.739675  | L         |
| H-HC-0.018700  | 0  | -8.075749  | 2.681165  | 0.000163  | L         |
| H-HC-0.023600  | 0  | -9.668649  | 1.359506  | 1.458903  | L         |
| H-HC-0.023600  | 0  | -8.462524  | 0.079254  | 1.562067  | L         |
| H-HC-0.088200  | 0  | -6.078145  | 0.495685  | 0.758046  | L         |
| H-HC-0.088200  | 0  | -5.707540  | 1.980673  | -0.140378 | L         |
| H-HC-0.088200  | 0  | -6.750961  | 0.781718  | -0.867155 | L         |
| H-HC-0.018600  | 0  | -9.697297  | 1.091002  | -1.040761 | L         |
| H-HC-0.018600  | 0  | -10.304128 | -0.289348 | -0.112932 | L         |
| H-HC-0.018600  | 0  | -8.686543  | -0.363962 | -0.824847 | L         |
| N-N--0.516300  | 0  | -5.083394  | 3.354180  | 2.539928  | L         |
| C-CT-0.038100  | -1 | -3.772911  | 3.973140  | 2.387861  | L H-HC 30 |
| C-C-0.536600   | 0  | -3.701146  | 5.490695  | 2.121597  | L         |
| O-O--0.581900  | 0  | -2.734688  | 6.016700  | 1.572385  | L         |
| C-CT--0.547145 | 0  | -3.013072  | 3.121581  | 1.334415  | H         |
| C-C-0.532653   | 0  | -2.592093  | 1.727493  | 1.803663  | H         |
| O-O2--0.588507 | 0  | -2.713450  | 1.417273  | 2.995653  | H         |
| O-O2--0.625559 | 0  | -2.023870  | 0.932307  | 0.941241  | H         |
| H-H-0.293600   | 0  | -5.057356  | 2.481102  | 3.053328  | L         |
| H-H1-0.088000  | 0  | -3.243810  | 3.841722  | 3.332109  | L         |
| H-HC-0.128435  | 0  | -2.081422  | 3.643447  | 1.065052  | H         |
| H-HC-0.183556  | 0  | -3.588984  | 3.087020  | 0.405385  | H         |
| N-N--0.415700  | 0  | -4.664434  | 6.245960  | 2.633659  | L         |
| C-CT--0.025200 | -1 | -4.650660  | 7.691202  | 2.511863  | L         |
| C-C-0.597300   | 0  | -3.748634  | 8.332280  | 3.549704  | L         |
| O-O--0.567900  | 0  | -4.222219  | 9.006446  | 4.466014  | L         |
| H-H-0.271900   | 0  | -5.474488  | 5.743826  | 2.960616  | L         |
| H-H1-0.069800  | 0  | -5.662284  | 8.069793  | 2.649629  | L         |
| H-H1-0.069800  | 0  | -4.310274  | 7.979794  | 1.516089  | L         |
| N-N--0.415700  | 0  | -2.446098  | 8.109307  | 3.405483  | L         |
| C-CT--0.038900 | -1 | -1.426634  | 8.554875  | 4.349256  | L         |
| C-C-0.597300   | 0  | -0.520474  | 9.638202  | 3.752417  | L         |
| O-O--0.567900  | 0  | -0.623349  | 10.008868 | 2.581990  | L         |
| C-CT-0.365400  | 0  | -0.581377  | 7.405602  | 4.944254  | L         |
| O-OH--0.676100 | 0  | 0.616300   | 7.241161  | 4.227202  | L         |

|                |    |           |           |           |   |
|----------------|----|-----------|-----------|-----------|---|
| C-CT--0.243800 | 0  | -1.290884 | 6.059027  | 5.054190  | L |
| H-H-0.271900   | 0  | -2.183763 | 7.508623  | 2.625658  | L |
| H-H1-0.100700  | 0  | -1.935736 | 9.017570  | 5.192694  | L |
| H-H1-0.004300  | 0  | -0.301052 | 7.705549  | 5.954538  | L |
| H-HC-0.064200  | 0  | -2.230122 | 6.182587  | 5.591066  | L |
| H-HC-0.064200  | 0  | -0.655900 | 5.362929  | 5.597267  | L |
| H-HC-0.064200  | 0  | -1.488277 | 5.649340  | 4.063756  | L |
| H-HO-0.410200  | 0  | 1.108044  | 6.482832  | 4.610923  | L |
| N-N--0.415700  | 0  | 0.397373  | 10.150742 | 4.576210  | L |
| C-CT--0.025200 | -1 | 1.439799  | 11.083195 | 4.161113  | L |
| C-C-0.597300   | 0  | 2.339579  | 10.593010 | 3.035878  | L |
| O-O--0.567900  | 0  | 2.674520  | 11.369955 | 2.146585  | L |
| H-H-0.271900   | 0  | 0.464250  | 9.739894  | 5.492015  | L |
| H-H1-0.069800  | 0  | 2.075559  | 11.315142 | 5.014394  | L |
| H-H1-0.069800  | 0  | 0.969517  | 12.008176 | 3.826842  | L |
| N-N--0.516300  | 0  | 2.735539  | 9.323715  | 3.091555  | L |
| C-CT-0.038100  | -1 | 3.645142  | 8.727581  | 2.113955  | L |
| C-C-0.536600   | 0  | 3.016550  | 8.443279  | 0.763346  | L |
| O-O--0.581900  | 0  | 3.750926  | 8.160876  | -0.176884 | L |
| C-CT--0.030300 | 0  | 4.231228  | 7.413764  | 2.662084  | L |
| C-C-0.799400   | -1 | 5.577323  | 7.615963  | 3.340580  | L |
| O-O2--0.801400 | -1 | 6.157018  | 8.720399  | 3.257988  | L |
| O-O2--0.801400 | -1 | 6.038238  | 6.663041  | 4.001426  | L |
| H-H-0.293600   | 0  | 2.361126  | 8.716228  | 3.806761  | L |
| H-H1-0.088000  | 0  | 4.447229  | 9.435495  | 1.902638  | L |
| H-HC--0.012200 | 0  | 4.389382  | 6.702134  | 1.849966  | L |
| H-HC--0.012200 | 0  | 3.528579  | 6.954022  | 3.360223  | L |
| N-N--0.415700  | 0  | 1.694086  | 8.521586  | 0.652115  | L |
| C-CT--0.002400 | -1 | 0.972980  | 8.314948  | -0.596703 | L |
| C-C-0.597300   | 0  | 0.379097  | 9.608721  | -1.155223 | L |
| O-O--0.567900  | 0  | 0.361460  | 9.818509  | -2.368306 | L |
| C-CT--0.034300 | 0  | -0.098366 | 7.232704  | -0.410626 | L |
| C-CA-0.011800  | 0  | 0.425598  | 5.915175  | 0.136791  | L |
| C-CA--0.125600 | 0  | 1.067137  | 4.985316  | -0.701663 | L |
| C-CA--0.125600 | 0  | 0.239679  | 5.604502  | 1.493730  | L |
| C-CA--0.170400 | 0  | 1.499377  | 3.751732  | -0.179408 | L |
| C-CA--0.170400 | 0  | 0.649673  | 4.366920  | 2.013621  | L |
| C-CA--0.107200 | 0  | 1.272610  | 3.436077  | 1.169940  | L |
| H-H-0.271900   | 0  | 1.174406  | 8.705976  | 1.497406  | L |
| H-H1-0.097800  | 0  | 1.659357  | 7.941452  | -1.355830 | L |
| H-HC-0.029500  | 0  | -0.570967 | 7.039053  | -1.374736 | L |
| H-HC-0.029500  | 0  | -0.872747 | 7.613121  | 0.257173  | L |
| H-HA-0.133000  | 0  | 1.186778  | 5.198516  | -1.752459 | L |
| H-HA-0.133000  | 0  | -0.279838 | 6.305375  | 2.120865  | L |
| H-HA-0.143000  | 0  | 1.955801  | 3.015069  | -0.820747 | L |
| H-HA-0.143000  | 0  | 0.441114  | 4.114736  | 3.041927  | L |
| H-HA-0.129700  | 0  | 1.537836  | 2.462089  | 1.546774  | L |
| N-N--0.415700  | 0  | -0.076091 | 10.504115 | -0.276125 | L |
| C-CT--0.149000 | -1 | -0.477226 | 11.848254 | -0.639336 | L |
| H-H-0.271900   | 0  | -0.069165 | 10.242632 | 0.704549  | L |
| H-H1-0.097600  | 0  | -0.865972 | 12.362566 | 0.240010  | L |
| H-H1-0.097600  | 0  | -1.249828 | 11.803826 | -1.408727 | L |
| H-H1-0.097600  | 0  | 0.385348  | 12.391873 | -1.027564 | L |
| C-CT--0.366200 | -1 | 7.983419  | 8.433592  | -0.169439 | L |

|                |    |           |           |           |   |
|----------------|----|-----------|-----------|-----------|---|
| C-C-0.597200   | 0  | 7.522121  | 7.637049  | -1.367594 | L |
| O-O--0.567900  | 0  | 8.343301  | 7.294252  | -2.214823 | L |
| H-HC-0.112300  | 0  | 7.515183  | 9.415332  | -0.185173 | L |
| H-HC-0.112300  | 0  | 9.065725  | 8.534389  | -0.200394 | L |
| H-HC-0.112300  | 0  | 7.696747  | 7.910063  | 0.743512  | L |
| N-N--0.415700  | 0  | 6.213293  | 7.384694  | -1.460907 | L |
| C-CT--0.051800 | -1 | 5.560255  | 6.855334  | -2.665896 | L |
| C-C-0.597300   | 0  | 4.923315  | 7.983851  | -3.476929 | L |
| O-O--0.567900  | 0  | 5.317504  | 8.259794  | -4.610534 | L |
| C-CT--0.110200 | 0  | 4.613658  | 5.681920  | -2.325243 | L |
| C-CT-0.353100  | 0  | 4.514804  | 4.650381  | -3.470035 | L |
| C-CT--0.412100 | 0  | 3.767265  | 3.399099  | -3.022223 | L |
| C-CT--0.412100 | 0  | 3.790763  | 5.170098  | -4.714802 | L |
| H-H-0.271900   | 0  | 5.609296  | 7.704663  | -0.710855 | L |
| H-H1-0.092200  | 0  | 6.345791  | 6.447690  | -3.303332 | L |
| H-HC-0.045700  | 0  | 3.621602  | 6.049957  | -2.062014 | L |
| H-HC-0.045700  | 0  | 5.014738  | 5.164557  | -1.453522 | L |
| H-HC--0.036100 | 0  | 5.522566  | 4.344621  | -3.754834 | L |
| H-HC-0.100000  | 0  | 2.709861  | 3.622127  | -2.884321 | L |
| H-HC-0.100000  | 0  | 4.179086  | 3.027292  | -2.085639 | L |
| H-HC-0.100000  | 0  | 3.869601  | 2.622396  | -3.777324 | L |
| H-HC-0.100000  | 0  | 2.821541  | 5.584730  | -4.434684 | L |
| H-HC-0.100000  | 0  | 3.639452  | 4.356741  | -5.423538 | L |
| H-HC-0.100000  | 0  | 4.387388  | 5.937175  | -5.203291 | L |
| N-N--0.415700  | 0  | 3.966989  | 8.658977  | -2.853487 | L |
| C-CT--0.149000 | -1 | 3.350952  | 9.884303  | -3.292633 | L |
| H-H-0.271900   | 0  | 3.764462  | 8.339965  | -1.913161 | L |
| H-H1-0.097600  | 0  | 4.065498  | 10.480372 | -3.861681 | L |
| H-H1-0.097600  | 0  | 3.012093  | 10.454853 | -2.426643 | L |
| H-H1-0.097600  | 0  | 2.490931  | 9.654230  | -3.923697 | L |
| C-CT--0.366200 | -1 | -8.714958 | 2.362798  | 8.135556  | L |
| C-C-0.597200   | 0  | -7.869698 | 1.133692  | 7.956901  | L |
| O-O--0.567900  | 0  | -7.579792 | 0.435198  | 8.921673  | L |
| H-HC-0.112300  | 0  | -9.618979 | 2.259628  | 7.538419  | L |
| H-HC-0.112300  | 0  | -8.150301 | 3.231717  | 7.801104  | L |
| H-HC-0.112300  | 0  | -8.971848 | 2.468882  | 9.187310  | L |
| N-N--0.415700  | 0  | -7.466280 | 0.889503  | 6.718838  | L |
| C-CT--0.038900 | -1 | -6.653415 | -0.254200 | 6.302645  | L |
| C-C-0.597300   | 0  | -5.399293 | 0.253427  | 5.616300  | L |
| O-O--0.567900  | 0  | -5.466904 | 0.726319  | 4.483386  | L |
| C-CT-0.365400  | 0  | -7.450407 | -1.229790 | 5.423454  | L |
| O-OH--0.676100 | 0  | -8.014922 | -0.575181 | 4.313317  | L |
| C-CT--0.243800 | 0  | -8.590358 | -1.865022 | 6.225106  | L |
| H-H-0.271900   | 0  | -7.776106 | 1.523372  | 5.986008  | L |
| H-H1-0.100700  | 0  | -6.341616 | -0.812270 | 7.185083  | L |
| H-H1-0.004300  | 0  | -6.783468 | -2.017854 | 5.072508  | L |
| H-HC-0.064200  | 0  | -8.184505 | -2.389751 | 7.089623  | L |
| H-HC-0.064200  | 0  | -9.135151 | -2.571682 | 5.605804  | L |
| H-HC-0.064200  | 0  | -9.287295 | -1.097731 | 6.560571  | L |
| H-HO-0.410200  | 0  | -7.339354 | 0.037155  | 3.985326  | L |
| N-N--0.415700  | 0  | -4.295423 | 0.220082  | 6.367751  | L |
| C-CT--0.059700 | -1 | -3.101053 | 1.042998  | 6.163611  | L |
| C-C-0.597300   | 0  | -1.854051 | 0.165173  | 6.097484  | L |
| O-O--0.567900  | 0  | -1.592967 | -0.626264 | 7.009584  | L |

|                |    |           |           |          |           |
|----------------|----|-----------|-----------|----------|-----------|
| C-CT-0.130300  | 0  | -2.984792 | 2.105273  | 7.282276 | L         |
| C-CT--0.043000 | 0  | -4.244549 | 2.991385  | 7.450215 | L         |
| C-CT--0.320400 | 0  | -1.748536 | 2.989765  | 7.057680 | L         |
| C-CT--0.066000 | 0  | -4.665426 | 3.803812  | 6.216357 | L         |
| H-H-0.271900   | 0  | -4.347073 | -0.253831 | 7.254159 | L         |
| H-H1-0.086900  | 0  | -3.200892 | 1.579500  | 5.225962 | L         |
| H-HC-0.018700  | 0  | -2.840665 | 1.581434  | 8.229125 | L         |
| H-HC-0.023600  | 0  | -4.069091 | 3.688994  | 8.269866 | L         |
| H-HC-0.023600  | 0  | -5.083856 | 2.364392  | 7.749680 | L         |
| H-HC-0.088200  | 0  | -1.747689 | 3.366472  | 6.034519 | L         |
| H-HC-0.088200  | 0  | -0.843450 | 2.400637  | 7.208058 | L         |
| H-HC-0.088200  | 0  | -1.740361 | 3.822264  | 7.759837 | L         |
| H-HC-0.018600  | 0  | -3.868605 | 4.481831  | 5.916065 | L         |
| H-HC-0.018600  | 0  | -5.552384 | 4.390018  | 6.456846 | L         |
| H-HC-0.018600  | 0  | -4.904720 | 3.141899  | 5.387234 | L         |
| N-N--0.516300  | 0  | -1.107262 | 0.330982  | 5.012359 | L         |
| C-CT-0.038100  | -1 | 0.194376  | -0.241716 | 4.725606 | L H-HC 17 |
| C-C-0.536600   | 0  | 1.133006  | -0.086360 | 5.927302 | L         |
| O-O--0.581900  | 0  | 1.341201  | 1.004224  | 6.452647 | L         |
| C-CT--0.520019 | 0  | 0.676818  | 0.428194  | 3.423487 | H         |
| C-C-0.636404   | 0  | 0.951447  | -0.508142 | 2.259977 | H         |
| O-O2--0.608036 | 0  | 0.339673  | -1.614242 | 2.155639 | H         |
| O-O2--0.608131 | 0  | 1.805027  | -0.063567 | 1.426017 | H         |
| H-H-0.293600   | 0  | -1.516495 | 0.905646  | 4.279873 | L         |
| H-H1-0.088000  | 0  | 0.049658  | -1.309007 | 4.551637 | L         |
| H-HC-0.132300  | 0  | 1.589422  | 0.993070  | 3.625837 | H         |
| H-HC-0.188993  | 0  | -0.068061 | 1.149484  | 3.069945 | H         |
| N-N--0.415700  | 0  | 1.682483  | -1.196900 | 6.386695 | L         |
| C-CT-0.033700  | -1 | 2.581591  | -1.242323 | 7.517645 | L         |
| C-C-0.597300   | 0  | 3.804582  | -2.061498 | 7.120818 | L         |
| O-O--0.567900  | 0  | 3.859635  | -3.285663 | 7.285016 | L         |
| C-CT--0.182500 | 0  | 1.824117  | -1.801499 | 8.730281 | L         |
| H-H-0.271900   | 0  | 1.379273  | -2.073351 | 5.977116 | L         |
| H-H1-0.082300  | 0  | 2.925028  | -0.236879 | 7.768732 | L         |
| H-HC-0.060300  | 0  | 0.983030  | -1.147611 | 8.964275 | L         |
| H-HC-0.060300  | 0  | 2.493582  | -1.850755 | 9.588693 | L         |
| H-HC-0.060300  | 0  | 1.449009  | -2.801295 | 8.505910 | L         |
| N-N--0.415700  | 0  | 4.771378  | -1.367117 | 6.533375 | L         |
| C-CT-0.018800  | -1 | 5.976241  | -1.948310 | 5.985691 | L H-HC 20 |
| C-C-0.597300   | 0  | 7.174020  | -1.800777 | 6.933312 | L         |
| O-O--0.567900  | 0  | 7.219353  | -0.956781 | 7.830846 | L         |
| C-CT--0.517456 | 0  | 6.225495  | -1.307255 | 4.618002 | H         |
| C-CM-0.287351  | 0  | 5.342471  | -1.771628 | 3.517944 | H         |
| N-N2--0.586994 | 0  | 5.475683  | -3.023259 | 2.933113 | H         |
| C-CM--0.020338 | 0  | 4.361741  | -1.154406 | 2.791469 | H         |
| C-CM-0.242458  | 0  | 4.603500  | -3.102509 | 1.893081 | H         |
| N-N2--0.505070 | 0  | 3.918759  | -1.979845 | 1.777499 | H         |
| H-H-0.271900   | 0  | 4.660535  | -0.358996 | 6.465351 | L         |
| H-H1-0.088100  | 0  | 5.829854  | -3.014222 | 5.843026 | L         |
| H-HC-0.166355  | 0  | 7.276744  | -1.481829 | 4.345327 | H         |
| H-HC-0.174481  | 0  | 6.124737  | -0.228310 | 4.760094 | H         |
| H-H-0.335795   | 0  | 6.123728  | -3.743865 | 3.243296 | H         |
| H-H4-0.152777  | 0  | 3.965067  | -0.159016 | 2.923928 | H         |
| H-H5-0.209475  | 0  | 4.497194  | -3.965676 | 1.250979 | H         |



|                |    |           |            |           |           |
|----------------|----|-----------|------------|-----------|-----------|
| N-N--0.415700  | 0  | 8.180506  | -2.635899  | 6.682342  | L         |
| C-CT--0.149000 | -1 | 9.448854  | -2.565958  | 7.374888  | L         |
| H-H-0.271900   | 0  | 8.030282  | -3.309538  | 5.938182  | L         |
| H-H1-0.097600  | 0  | 10.124238 | -3.331331  | 6.991524  | L         |
| H-H1-0.097600  | 0  | 9.290299  | -2.720531  | 8.443539  | L         |
| H-H1-0.097600  | 0  | 9.893242  | -1.580494  | 7.223712  | L         |
| C-CT--0.366200 | -1 | 8.370440  | -9.387169  | 0.917430  | L         |
| C-C-0.597200   | 0  | 8.747983  | -9.160524  | -0.534124 | L         |
| O-O--0.567900  | 0  | 9.781475  | -8.556823  | -0.794944 | L         |
| H-HC-0.112300  | 0  | 8.292493  | -10.453143 | 1.117615  | L         |
| H-HC-0.112300  | 0  | 7.430137  | -8.882693  | 1.132299  | L         |
| H-HC-0.112300  | 0  | 9.148315  | -8.955447  | 1.547129  | L         |
| N-N--0.254800  | 0  | 7.928392  | -9.618846  | -1.496893 | L         |
| C-CT--0.026600 | -1 | 8.168040  | -9.379966  | -2.922395 | L         |
| C-C-0.589600   | 0  | 8.015059  | -7.907221  | -3.302587 | L         |
| O-O--0.574800  | 0  | 8.722744  | -7.410852  | -4.175941 | L         |
| C-CT--0.007000 | 0  | 7.160695  | -10.274135 | -3.653004 | L         |
| C-CT-0.018900  | 0  | 6.002507  | -10.400357 | -2.661963 | L         |
| C-CT-0.019200  | 0  | 6.697158  | -10.372291 | -1.299660 | L         |
| H-H1-0.064100  | 0  | 9.180433  | -9.688889  | -3.185757 | L         |
| H-HC-0.025300  | 0  | 7.604951  | -11.257160 | -3.816310 | L         |
| H-HC-0.025300  | 0  | 6.837845  | -9.843880  | -4.602341 | L         |
| H-HC-0.021300  | 0  | 5.442012  | -11.323895 | -2.809908 | L         |
| H-HC-0.021300  | 0  | 5.343208  | -9.535899  | -2.754875 | L         |
| H-H1-0.039100  | 0  | 6.050387  | -9.898659  | -0.559726 | L         |
| H-H1-0.039100  | 0  | 6.942353  | -11.389024 | -0.989811 | L         |
| N-N--0.516300  | 0  | 7.093446  | -7.211227  | -2.635434 | L         |
| C-CT-0.039700  | -1 | 6.841487  | -5.784704  | -2.810895 | L         |
| C-C-0.536600   | 0  | 8.100738  | -4.919571  | -2.683952 | L         |
| O-O--0.581900  | 0  | 8.274381  | -3.937469  | -3.409036 | L         |
| C-CT-0.056000  | 0  | 5.739785  | -5.336821  | -1.839432 | L H-HC 24 |
| C-CT--0.515956 | 0  | 5.220698  | -3.937727  | -2.196963 | H         |
| C-C-0.587828   | 0  | 4.114296  | -3.403861  | -1.289608 | H         |
| O-O2--0.600319 | 0  | 4.045044  | -2.121335  | -1.256109 | H         |
| O-O2--0.589127 | 0  | 3.359093  | -4.196237  | -0.682061 | H         |
| H-H-0.293600   | 0  | 6.562700  | -7.685992  | -1.924365 | L         |
| H-H1-0.110500  | 0  | 6.467061  | -5.633234  | -3.823688 | L         |
| H-HC--0.017300 | 0  | 6.128011  | -5.335322  | -0.819752 | L         |
| H-HC--0.017300 | 0  | 4.909684  | -6.042620  | -1.898951 | L         |
| H-HC-0.167759  | 0  | 4.830535  | -3.966296  | -3.221658 | H         |
| H-HC-0.135230  | 0  | 6.048982  | -3.220569  | -2.187045 | H         |
| N-N--0.415700  | 0  | 9.011343  | -5.323397  | -1.800654 | L         |
| C-CT--0.024900 | -1 | 10.250453 | -4.621960  | -1.485864 | L         |
| C-C-0.597300   | 0  | 11.272019 | -4.512249  | -2.611013 | L         |
| O-O--0.567900  | 0  | 12.254243 | -3.782204  | -2.477059 | L         |
| C-CT-0.211700  | 0  | 10.891360 | -5.257730  | -0.246015 | L         |
| O-OH--0.654600 | 0  | 9.934733  | -5.450652  | 0.785563  | L         |
| H-H-0.271900   | 0  | 8.800371  | -6.129599  | -1.229056 | L         |
| H-H1-0.084300  | 0  | 9.983821  | -3.597857  | -1.219956 | L         |
| H-H1-0.035200  | 0  | 11.689176 | -4.608688  | 0.117961  | L         |
| H-H1-0.035200  | 0  | 11.319349 | -6.224791  | -0.514358 | L         |
| H-HO-0.427500  | 0  | 9.386567  | -4.638442  | 0.869921  | L         |
| N-N--0.415700  | 0  | 11.030699 | -5.194817  | -3.728439 | L         |
| C-CT-0.033700  | -1 | 11.779839 | -5.030925  | -4.967453 | L         |

|                |    |           |           |           |   |
|----------------|----|-----------|-----------|-----------|---|
| C-C-0.597300   | 0  | 10.946105 | -4.475804 | -6.127009 | L |
| O-O--0.567900  | 0  | 11.378335 | -4.488581 | -7.278828 | L |
| C-CT--0.182500 | 0  | 12.408816 | -6.391398 | -5.301712 | L |
| H-H-0.271900   | 0  | 10.214414 | -5.795891 | -3.736368 | L |
| H-H1-0.082300  | 0  | 12.594373 | -4.321780 | -4.813777 | L |
| H-HC-0.060300  | 0  | 13.025813 | -6.728141 | -4.467909 | L |
| H-HC-0.060300  | 0  | 13.034786 | -6.299411 | -6.189942 | L |
| H-HC-0.060300  | 0  | 11.623768 | -7.125214 | -5.491224 | L |
| N-N--0.415700  | 0  | 9.766272  | -3.959071 | -5.801378 | L |
| C-CT--0.025200 | -1 | 8.862248  | -3.276174 | -6.703869 | L |
| C-C-0.597300   | 0  | 8.815809  | -1.772239 | -6.483284 | L |
| O-O--0.567900  | 0  | 8.836338  | -0.999486 | -7.438510 | L |
| H-H-0.271900   | 0  | 9.488402  | -4.015047 | -4.827728 | L |
| H-H1-0.069800  | 0  | 7.855438  | -3.666915 | -6.559481 | L |
| H-H1-0.069800  | 0  | 9.150999  | -3.459425 | -7.739285 | L |
| N-N--0.415700  | 0  | 8.752925  | -1.366676 | -5.218109 | L |
| C-CT--0.002400 | -1 | 8.580018  | 0.018484  | -4.797204 | L |
| C-C-0.597300   | 0  | 9.695602  | 0.452663  | -3.839774 | L |
| O-O--0.567900  | 0  | 10.320975 | -0.398895 | -3.199031 | L |
| C-CT--0.034300 | 0  | 7.192029  | 0.140648  | -4.141975 | L |
| C-CA-0.011800  | 0  | 6.048050  | -0.119151 | -5.105057 | L |
| C-CA--0.125600 | 0  | 5.630860  | 0.890351  | -5.993429 | L |
| C-CA--0.125600 | 0  | 5.431591  | -1.383906 | -5.149027 | L |
| C-CA--0.170400 | 0  | 4.615090  | 0.631224  | -6.931582 | L |
| C-CA--0.170400 | 0  | 4.412063  | -1.641135 | -6.082721 | L |
| C-CA--0.107200 | 0  | 4.009721  | -0.637230 | -6.981016 | L |
| H-H-0.271900   | 0  | 8.752299  | -2.074181 | -4.492857 | L |
| H-H1-0.097800  | 0  | 8.609629  | 0.669059  | -5.671419 | L |
| H-HC-0.029500  | 0  | 7.065665  | 1.137163  | -3.719723 | L |
| H-HC-0.029500  | 0  | 7.133251  | -0.566568 | -3.312985 | L |
| H-HA-0.133000  | 0  | 6.096282  | 1.864870  | -5.963773 | L |
| H-HA-0.133000  | 0  | 5.749968  | -2.162848 | -4.472091 | L |
| H-HA-0.143000  | 0  | 4.296886  | 1.408809  | -7.611391 | L |
| H-HA-0.143000  | 0  | 3.935137  | -2.610082 | -6.108436 | L |
| H-HA-0.129700  | 0  | 3.221726  | -0.834845 | -7.694366 | L |
| N-N--0.254800  | 0  | 9.952824  | 1.766000  | -3.696663 | L |
| C-CT--0.026600 | -1 | 10.818388 | 2.260304  | -2.632526 | L |
| C-C-0.589600   | 0  | 10.184540 | 2.014265  | -1.254519 | L |
| O-O--0.574800  | 0  | 8.990641  | 1.707200  | -1.174470 | L |
| C-CT--0.007000 | 0  | 10.979482 | 3.759355  | -2.917642 | L |
| C-CT-0.018900  | 0  | 9.661819  | 4.129211  | -3.596574 | L |
| C-CT-0.019200  | 0  | 9.348391  | 2.880495  | -4.420687 | L |
| H-H1-0.064100  | 0  | 11.787097 | 1.764853  | -2.688513 | L |
| H-HC-0.025300  | 0  | 11.803343 | 3.910383  | -3.616643 | L |
| H-HC-0.025300  | 0  | 11.139761 | 4.344803  | -2.010955 | L |
| H-HC-0.021300  | 0  | 9.760060  | 5.016649  | -4.222567 | L |
| H-HC-0.021300  | 0  | 8.886786  | 4.277233  | -2.841843 | L |
| H-H1-0.039100  | 0  | 8.269660  | 2.773232  | -4.525045 | L |
| H-H1-0.039100  | 0  | 9.811879  | 2.963741  | -5.404520 | L |
| N-N--0.254800  | 0  | 10.951306 | 2.129662  | -0.159910 | L |
| C-CT--0.026600 | -1 | 10.399468 | 2.115527  | 1.187746  | L |
| C-C-0.589600   | 0  | 9.349081  | 3.200465  | 1.426095  | L |
| O-O--0.574800  | 0  | 9.615033  | 4.381414  | 1.214433  | L |
| C-CT--0.007000 | 0  | 11.600468 | 2.295334  | 2.127257  | L |

|                |    |           |           |           |           |
|----------------|----|-----------|-----------|-----------|-----------|
| C-CT-0.018900  | 0  | 12.786078 | 1.810112  | 1.296793  | L         |
| C-CT-0.019200  | 0  | 12.401214 | 2.231663  | -0.118381 | L         |
| H-H1-0.064100  | 0  | 9.957530  | 1.134185  | 1.366230  | L         |
| H-HC-0.025300  | 0  | 11.483957 | 1.712972  | 3.041801  | L         |
| H-HC-0.025300  | 0  | 11.744670 | 3.350364  | 2.367305  | L         |
| H-HC-0.021300  | 0  | 12.849772 | 0.721836  | 1.348336  | L         |
| H-HC-0.021300  | 0  | 13.722362 | 2.268425  | 1.616131  | L         |
| H-H1-0.039100  | 0  | 12.698588 | 3.266572  | -0.292940 | L         |
| H-H1-0.039100  | 0  | 12.876736 | 1.567728  | -0.841099 | L         |
| N-N--0.415700  | 0  | 8.178259  | 2.774659  | 1.890247  | L         |
| C-CT-0.018800  | -1 | 7.022299  | 3.603063  | 2.188048  | L H-HC 33 |
| C-C-0.597300   | 0  | 6.158368  | 3.008519  | 3.297749  | L         |
| O-O--0.567900  | 0  | 6.185116  | 1.800158  | 3.530171  | L         |
| C-CT--0.515368 | 0  | 6.203535  | 3.726522  | 0.874575  | H         |
| C-CM-0.287903  | 0  | 5.601948  | 2.453130  | 0.357079  | H         |
| N-N2--0.582625 | 0  | 6.219684  | 1.666421  | -0.602591 | H         |
| C-CM--0.036893 | 0  | 4.475702  | 1.738942  | 0.694062  | H         |
| C-CM-0.243454  | 0  | 5.478483  | 0.545966  | -0.799066 | H         |
| N-N2--0.523998 | 0  | 4.415085  | 0.555655  | -0.016200 | H         |
| H-H-0.271900   | 0  | 8.036073  | 1.777502  | 1.963489  | L         |
| H-H1-0.088100  | 0  | 7.356482  | 4.596626  | 2.501781  | L         |
| H-HC-0.162301  | 0  | 6.862714  | 4.180143  | 0.119892  | H         |
| H-HC-0.188340  | 0  | 5.412413  | 4.464718  | 1.055243  | H         |
| H-H-0.339448   | 0  | 7.131319  | 1.864047  | -1.015295 | H         |
| H-H4-0.185957  | 0  | 3.710987  | 1.998328  | 1.409847  | H         |
| H-H5-0.211295  | 0  | 5.742977  | -0.244529 | -1.485882 | H         |
| N-N--0.415700  | 0  | 5.379199  | 3.868602  | 3.941562  | L         |
| C-CT-0.014300  | -1 | 4.560477  | 3.588801  | 5.112111  | L         |
| C-C-0.597300   | 0  | 5.215333  | 2.637957  | 6.124593  | L         |
| O-O--0.567900  | 0  | 4.694465  | 1.584359  | 6.494904  | L         |
| C-CT--0.204100 | 0  | 3.092007  | 3.346461  | 4.740959  | L         |
| C-C-0.713000   | 0  | 2.203964  | 4.197651  | 5.632199  | L         |
| N-N--0.919100  | 0  | 1.671476  | 3.674293  | 6.701284  | L         |
| O-O--0.593100  | 0  | 2.012938  | 5.381577  | 5.415988  | L         |
| H-H-0.271900   | 0  | 5.509214  | 4.855100  | 3.710840  | L         |
| H-H1-0.104800  | 0  | 4.560870  | 4.547171  | 5.636660  | L         |
| H-HC-0.079700  | 0  | 2.850090  | 2.294179  | 4.846718  | L         |
| H-HC-0.079700  | 0  | 2.909818  | 3.646948  | 3.709950  | L         |
| H-H-0.419600   | 0  | 1.031531  | 4.239591  | 7.215601  | L         |
| H-H-0.419600   | 0  | 1.707339  | 2.658480  | 6.783952  | L         |
| N-N--0.415700  | 0  | 6.401881  | 3.071143  | 6.563747  | L         |
| C-CT--0.149000 | -1 | 7.308260  | 2.330879  | 7.420264  | L         |
| H-H-0.271900   | 0  | 6.711839  | 3.944605  | 6.160702  | L         |
| H-H1-0.097600  | 0  | 8.063187  | 2.996628  | 7.837954  | L         |
| H-H1-0.097600  | 0  | 7.794507  | 1.543302  | 6.841436  | L         |
| H-H1-0.097600  | 0  | 6.749419  | 1.857850  | 8.230844  | L         |
| C-CT--0.366200 | -1 | -2.234201 | -2.744758 | 9.542300  | L         |
| C-C-0.597200   | 0  | -2.341535 | -3.844955 | 8.523169  | L         |
| O-O--0.567900  | 0  | -2.864263 | -4.914887 | 8.824520  | L         |
| H-HC-0.112300  | 0  | -1.184313 | -2.500984 | 9.693307  | L         |
| H-HC-0.112300  | 0  | -2.676079 | -3.080427 | 10.477941 | L         |
| H-HC-0.112300  | 0  | -2.763931 | -1.867205 | 9.176203  | L         |
| N-N--0.347900  | 0  | -1.822754 | -3.582260 | 7.327350  | L         |
| C-CT--0.240000 | -1 | -1.730009 | -4.544683 | 6.223448  | L         |

|                |    |           |           |           |           |
|----------------|----|-----------|-----------|-----------|-----------|
| C-C-0.734100   | 0  | -0.323345 | -4.574441 | 5.635858  | L         |
| O-O--0.589400  | 0  | 0.500000  | -3.704696 | 5.904802  | L         |
| C-CT--0.009400 | 0  | -2.840372 | -4.246841 | 5.198087  | L         |
| C-CT-0.018700  | 0  | -2.604170 | -2.974094 | 4.377252  | L H-HC 37 |
| C-CT--0.464524 | 0  | -3.753043 | -2.750444 | 3.386902  | H         |
| C-CT--0.195159 | 0  | -3.518722 | -1.625417 | 2.385856  | H         |
| N-N3--0.748751 | 0  | -2.363865 | -1.950620 | 1.474613  | H         |
| H-H-0.274700   | 0  | -1.442356 | -2.648785 | 7.183522  | L         |
| H-H1-0.142600  | 0  | -1.913583 | -5.541538 | 6.624309  | L         |
| H-HC-0.036200  | 0  | -3.793594 | -4.160867 | 5.722779  | L         |
| H-HC-0.036200  | 0  | -2.923830 | -5.083542 | 4.511685  | L         |
| H-HC-0.010300  | 0  | -1.664257 | -3.067811 | 3.833281  | L         |
| H-HC-0.010300  | 0  | -2.548624 | -2.120239 | 5.042705  | L         |
| H-HC-0.173903  | 0  | -4.663512 | -2.535737 | 3.952677  | H         |
| H-HC-0.148535  | 0  | -3.930130 | -3.687790 | 2.836514  | H         |
| H-HP-0.236066  | 0  | -3.314131 | -0.646528 | 2.827015  | H         |
| H-HP-0.172509  | 0  | -4.391370 | -1.539882 | 1.727085  | H         |
| H-H-0.437293   | 0  | -2.508169 | -1.498922 | 0.536202  | H         |
| H-H-0.366736   | 0  | -2.362385 | -2.964676 | 1.296840  | H         |
| H-H-0.419451   | 0  | -1.425444 | -1.668818 | 1.839984  | H         |
| N-N--0.415700  | 0  | -0.029956 | -5.602778 | 4.853655  | L         |
| C-CT--0.025200 | -1 | 1.290338  | -5.811125 | 4.267916  | L         |
| C-C-0.597300   | 0  | 1.164602  | -6.561776 | 2.939300  | L         |
| O-O--0.567900  | 0  | 1.699070  | -7.652827 | 2.751752  | L         |
| H-H-0.271900   | 0  | -0.776579 | -6.247916 | 4.615010  | L         |
| H-H1-0.069800  | 0  | 1.908853  | -6.395860 | 4.948837  | L         |
| H-H1-0.069800  | 0  | 1.779390  | -4.854948 | 4.077832  | L         |
| N-N--0.415700  | 0  | 0.395179  | -5.960365 | 2.037112  | L         |
| C-CT--0.025200 | -1 | -0.222698 | -6.546315 | 0.848898  | L         |
| C-C-0.597300   | 0  | -1.307022 | -5.577887 | 0.416216  | L         |
| O-O--0.567900  | 0  | -2.089060 | -5.127355 | 1.250972  | L         |
| H-H-0.271900   | 0  | -0.001497 | -5.081390 | 2.343925  | L         |
| H-H1-0.069800  | 0  | -0.669891 | -7.508844 | 1.096527  | L         |
| H-H1-0.069800  | 0  | 0.524284  | -6.664702 | 0.063676  | L         |
| N-N--0.415700  | 0  | -1.334428 | -5.221804 | -0.864829 | L         |
| C-CT--0.001400 | -1 | -2.152501 | -4.116146 | -1.363645 | L         |
| C-C-0.597300   | 0  | -3.628168 | -4.202602 | -0.952231 | L         |
| O-O--0.567900  | 0  | -4.231104 | -3.230425 | -0.514420 | L         |
| C-CT--0.015200 | 0  | -2.031793 | -4.026878 | -2.897470 | L         |
| C-CA--0.001100 | 0  | -0.643695 | -4.259738 | -3.468143 | L         |
| C-CA--0.190600 | 0  | 0.383597  | -3.324138 | -3.240705 | L         |
| C-CA--0.190600 | 0  | -0.384216 | -5.415682 | -4.232138 | L         |
| C-CA--0.234100 | 0  | 1.668696  | -3.545703 | -3.772153 | L         |
| C-CA--0.234100 | 0  | 0.899331  | -5.639402 | -4.765857 | L         |
| C-C-0.322600   | 0  | 1.929941  | -4.701660 | -4.535110 | L         |
| O-OH--0.557900 | 0  | 3.164283  | -4.916062 | -5.063818 | L         |
| H-H-0.271900   | 0  | -0.581923 | -5.529000 | -1.464073 | L         |
| H-H1-0.087600  | 0  | -1.745543 | -3.192408 | -0.952637 | L         |
| H-HC-0.029500  | 0  | -2.359141 | -3.037282 | -3.211835 | L         |
| H-HC-0.029500  | 0  | -2.715995 | -4.745608 | -3.349652 | L         |
| H-HA-0.169900  | 0  | 0.191765  | -2.426304 | -2.660954 | L         |
| H-HA-0.169900  | 0  | -1.178856 | -6.120686 | -4.427486 | L         |
| H-HA-0.165600  | 0  | 2.455840  | -2.829153 | -3.594696 | L         |
| H-HA-0.165600  | 0  | 1.090415  | -6.517531 | -5.360339 | L         |

|                |    |            |            |           |   |
|----------------|----|------------|------------|-----------|---|
| H-HO-0.399200  | 0  | 3.172049   | -5.704643  | -5.603197 | L |
| N-N--0.415700  | 0  | -4.206199  | -5.397473  | -1.068944 | L |
| C-CT--0.024900 | -1 | -5.551194  | -5.660302  | -0.575538 | L |
| C-C-0.597300   | 0  | -5.670691  | -5.561615  | 0.942346  | L |
| O-O--0.567900  | 0  | -4.994776  | -6.281302  | 1.687548  | L |
| C-CT-0.211700  | 0  | -6.013401  | -7.057333  | -0.992255 | L |
| O-OH--0.654600 | -1 | -7.270144  | -7.361569  | -0.409598 | L |
| H-H-0.271900   | 0  | -3.621570  | -6.149663  | -1.385880 | L |
| H-H1-0.084300  | 0  | -6.230145  | -4.936248  | -1.026677 | L |
| H-H1-0.035200  | 0  | -5.281365  | -7.792758  | -0.656482 | L |
| H-H1-0.035200  | 0  | -6.088798  | -7.104498  | -2.078841 | L |
| H-HO-0.427500  | -1 | -7.527415  | -8.234594  | -0.716083 | L |
| N-N--0.415700  | 0  | -6.658494  | -4.778000  | 1.368630  | L |
| C-CT-0.033700  | -1 | -7.145921  | -4.682814  | 2.733364  | L |
| C-C-0.597300   | 0  | -7.459236  | -6.020002  | 3.410374  | L |
| O-O--0.567900  | 0  | -7.309221  | -6.151474  | 4.623004  | L |
| C-CT--0.182500 | 0  | -8.364882  | -3.760094  | 2.737699  | L |
| H-H-0.271900   | 0  | -7.131683  | -4.211084  | 0.671079  | L |
| H-H1-0.082300  | 0  | -6.367536  | -4.207068  | 3.330857  | L |
| H-HC-0.060300  | 0  | -8.105348  | -2.788539  | 2.312751  | L |
| H-HC-0.060300  | 0  | -8.706948  | -3.621654  | 3.758704  | L |
| H-HC-0.060300  | 0  | -9.170044  | -4.210130  | 2.162886  | L |
| N-N--0.415700  | 0  | -7.906823  | -7.008907  | 2.635476  | L |
| C-CT--0.025200 | -1 | -8.268303  | -8.328643  | 3.140157  | L |
| C-C-0.597300   | 0  | -7.314801  | -9.441397  | 2.719446  | L |
| O-O--0.567900  | 0  | -7.741627  | -10.578821 | 2.533361  | L |
| H-H-0.271900   | 0  | -7.947002  | -6.824370  | 1.639704  | L |
| H-H1-0.069800  | 0  | -9.260640  | -8.581359  | 2.767783  | L |
| H-H1-0.069800  | 0  | -8.317395  | -8.324332  | 4.229348  | L |
| N-N--0.415700  | 0  | -6.021375  | -9.136775  | 2.621073  | L |
| C-CT--0.024900 | -1 | -4.951259  | -10.135615 | 2.615803  | L |
| C-C-0.597300   | 0  | -4.236767  | -10.098286 | 3.961224  | L |
| O-O--0.567900  | 0  | -3.917359  | -9.021817  | 4.475391  | L |
| C-CT-0.211700  | 0  | -3.972531  | -9.851449  | 1.472188  | L |
| O-OH--0.654600 | -1 | -3.073407  | -10.935972 | 1.296666  | L |
| H-H-0.271900   | 0  | -5.765570  | -8.166489  | 2.774379  | L |
| H-H1-0.084300  | 0  | -5.370533  | -11.129661 | 2.460094  | L |
| H-H1-0.035200  | 0  | -3.417343  | -8.934733  | 1.678326  | L |
| H-H1-0.035200  | 0  | -4.539657  | -9.716922  | 0.550296  | L |
| H-HO-0.427500  | -1 | -2.533792  | -10.747886 | 0.525245  | L |
| N-N--0.415700  | 0  | -4.033746  | -11.274780 | 4.553612  | L |
| C-CT--0.149000 | -1 | -3.510433  | -11.417874 | 5.901596  | L |
| H-H-0.271900   | 0  | -4.308381  | -12.095302 | 4.037411  | L |
| H-H1-0.097600  | 0  | -3.271486  | -12.461363 | 6.106810  | L |
| H-H1-0.097600  | 0  | -4.248959  | -11.067264 | 6.625904  | L |
| H-H1-0.097600  | 0  | -2.605997  | -10.815433 | 6.016031  | L |
| C-CT--0.366200 | -1 | -12.140442 | 5.066045   | -0.643762 | L |
| C-C-0.597200   | 0  | -10.714095 | 5.257937   | -0.199689 | L |
| O-O--0.567900  | 0  | -10.404038 | 5.010751   | 0.960442  | L |
| H-HC-0.112300  | 0  | -12.532659 | 6.011809   | -1.010984 | L |
| H-HC-0.112300  | 0  | -12.730384 | 4.728798   | 0.206812  | L |
| H-HC-0.112300  | 0  | -12.169066 | 4.311094   | -1.427352 | L |
| N-N--0.415700  | 0  | -9.862379  | 5.688129   | -1.125922 | L |
| C-CT--0.025200 | -1 | -8.429558  | 5.859401   | -0.901033 | L |

|                |    |            |          |           |           |
|----------------|----|------------|----------|-----------|-----------|
| C-C-0.597300   | 0  | -7.610569  | 5.689122 | -2.157101 | L         |
| O-O--0.567900  | 0  | -8.129602  | 5.942471 | -3.251783 | L         |
| H-H-0.271900   | 0  | -10.170261 | 5.825730 | -2.076304 | L         |
| H-H1-0.069800  | 0  | -8.118594  | 5.101315 | -0.193209 | L         |
| H-H1-0.069800  | 0  | -8.227502  | 6.842903 | -0.479330 | L         |
| N-N--0.415700  | 0  | -6.343168  | 5.298514 | -1.978273 | L H-H1 48 |
| C-CT--0.530209 | -1 | -5.347094  | 5.285182 | -3.048790 | H         |
| C-C-0.568093   | 0  | -4.445865  | 4.066332 | -2.932583 | H         |
| O-O--0.528105  | 0  | -4.129941  | 3.577972 | -1.829806 | H         |
| C-CT-0.298500  | 0  | -4.521604  | 6.596439 | -3.056015 | L H-H1 48 |
| C-CT--0.319200 | 0  | -5.383078  | 7.795667 | -3.458743 | L         |
| C-CT--0.319200 | 0  | -3.845334  | 6.893973 | -1.713709 | L         |
| H-H-0.271900   | 0  | -6.021691  | 5.057271 | -1.042461 | L         |
| H-H1-0.184096  | 0  | -5.887665  | 5.245397 | -4.000195 | H         |
| H-HC--0.029700 | 0  | -3.739749  | 6.501530 | -3.808692 | L         |
| H-HC-0.079100  | 0  | -6.120667  | 8.002621 | -2.685482 | L         |
| H-HC-0.079100  | 0  | -5.892834  | 7.578222 | -4.396112 | L         |
| H-HC-0.079100  | 0  | -4.745956  | 8.669203 | -3.589281 | L         |
| H-HC-0.079100  | 0  | -4.587497  | 7.029296 | -0.929025 | L         |
| H-HC-0.079100  | 0  | -3.234570  | 7.791384 | -1.795865 | L         |
| H-HC-0.079100  | 0  | -3.195948  | 6.062132 | -1.435534 | L         |
| N-N--0.610103  | 0  | -3.966003  | 3.555520 | -4.076110 | H         |
| C-CT--0.314060 | -1 | -4.236666  | 3.992083 | -5.425780 | H         |
| C-C-0.597300   | 0  | -5.353239  | 3.167525 | -6.056358 | L H-H1 50 |
| O-O--0.567900  | 0  | -5.485894  | 1.964102 | -5.834998 | L         |
| C-CT--0.110200 | 0  | -2.949001  | 3.907946 | -6.282998 | L H-H1 50 |
| C-CT-0.353100  | 0  | -1.936065  | 5.055681 | -6.056422 | L         |
| C-CT--0.412100 | 0  | -1.091080  | 4.928146 | -4.788501 | L         |
| C-CT--0.412100 | 0  | -0.960114  | 5.116978 | -7.236257 | L         |
| H-H-0.398207   | 0  | -3.371891  | 2.731074 | -3.986871 | H         |
| H-H1-0.165130  | 0  | -4.553182  | 5.034833 | -5.430586 | H         |
| H-HC-0.045700  | 0  | -3.254191  | 3.945442 | -7.328799 | L         |
| H-HC-0.045700  | 0  | -2.457703  | 2.948100 | -6.128092 | L         |
| H-HC--0.036100 | 0  | -2.476860  | 6.002276 | -6.025987 | L         |
| H-HC-0.100000  | 0  | -0.528783  | 3.996273 | -4.803759 | L         |
| H-HC-0.100000  | 0  | -1.734593  | 4.924111 | -3.908792 | L         |
| H-HC-0.100000  | 0  | -0.405494  | 5.769314 | -4.701710 | L         |
| H-HC-0.100000  | 0  | -0.399556  | 4.184815 | -7.296390 | L         |
| H-HC-0.100000  | 0  | -0.265721  | 5.944307 | -7.091322 | L         |
| H-HC-0.100000  | 0  | -1.508898  | 5.274854 | -8.162828 | L         |
| N-N--0.415700  | 0  | -6.140294  | 3.816415 | -6.910342 | L         |
| C-CT--0.038900 | -1 | -7.329833  | 3.220287 | -7.530614 | L         |
| C-C-0.597300   | 0  | -7.084249  | 1.883697 | -8.220040 | L         |
| O-O--0.567900  | 0  | -7.966050  | 1.028133 | -8.263874 | L         |
| C-CT-0.365400  | -1 | -7.968879  | 4.143969 | -8.591934 | L         |
| O-OH--0.676100 | -1 | -7.907539  | 5.501356 | -8.144506 | L         |
| C-CT--0.243800 | 0  | -9.447574  | 3.853703 | -8.849194 | L         |
| H-H-0.271900   | 0  | -6.013171  | 4.813705 | -6.997991 | L         |
| H-H1-0.100700  | 0  | -8.068993  | 3.079233 | -6.748953 | L         |
| H-H1-0.004300  | 0  | -7.414718  | 4.067795 | -9.528468 | L         |
| H-HC-0.064200  | 0  | -9.563461  | 2.849903 | -9.257478 | L         |
| H-HC-0.064200  | 0  | -9.842719  | 4.567650 | -9.571615 | L         |
| H-HC-0.064200  | 0  | -10.009918 | 3.924558 | -7.917338 | L         |
| H-HO-0.410200  | -1 | -8.805908  | 5.836012 | -8.108137 | L         |

|                |    |            |           |            |           |
|----------------|----|------------|-----------|------------|-----------|
| N-N--0.415700  | 0  | -5.907997  | 1.747851  | -8.829129  | L         |
| C-CT--0.025200 | -1 | -5.523441  | 0.591468  | -9.625329  | L         |
| C-C-0.597300   | 0  | -4.639370  | -0.421458 | -8.927641  | L         |
| O-O--0.567900  | 0  | -4.163741  | -1.339229 | -9.597004  | L         |
| H-H-0.271900   | 0  | -5.220624  | 2.461266  | -8.637891  | L         |
| H-H1-0.069800  | 0  | -4.984417  | 0.938397  | -10.505671 | L         |
| H-H1-0.069800  | 0  | -6.413030  | 0.064504  | -9.970207  | L         |
| N-N--0.415700  | 0  | -4.409088  | -0.235382 | -7.622942  | L H-H1 54 |
| C-CT--0.539097 | -1 | -3.476043  | -1.017391 | -6.823040  | H         |
| C-C-0.572106   | 0  | -4.217472  | -1.459712 | -5.563007  | H         |
| O-O--0.533001  | 0  | -4.982538  | -2.416952 | -5.656560  | H         |
| C-CT-0.130300  | 0  | -2.119133  | -0.284640 | -6.652811  | L H-H1 54 |
| C-CT--0.043000 | 0  | -1.510069  | 0.166844  | -8.002296  | L         |
| C-CT--0.320400 | 0  | -1.164928  | -1.252695 | -5.931830  | L         |
| C-CT--0.066000 | 0  | -0.189278  | 0.938574  | -7.880791  | L         |
| H-H-0.271900   | 0  | -4.862881  | 0.542852  | -7.152760  | L         |
| H-H1-0.180646  | 0  | -3.275954  | -1.942679 | -7.374070  | H         |
| H-HC-0.018700  | 0  | -2.272071  | 0.599337  | -6.038951  | L         |
| H-HC-0.023600  | 0  | -2.210808  | 0.835377  | -8.500545  | L         |
| H-HC-0.023600  | 0  | -1.356969  | -0.703970 | -8.640902  | L         |
| H-HC-0.088200  | 0  | -1.011812  | -2.148757 | -6.531459  | L         |
| H-HC-0.088200  | 0  | -1.572516  | -1.536507 | -4.963592  | L         |
| H-HC-0.088200  | 0  | -0.207055  | -0.777551 | -5.739079  | L         |
| H-HC-0.018600  | 0  | -0.310989  | 1.767951  | -7.184828  | L         |
| H-HC-0.018600  | 0  | 0.086779   | 1.334171  | -8.858211  | L         |
| H-HC-0.018600  | 0  | 0.609646   | 0.283164  | -7.535697  | L         |
| N-N--0.611145  | 0  | -4.048402  | -0.723787 | -4.431738  | H         |
| C-CT--0.109296 | -1 | -4.636342  | -1.118521 | -3.159665  | H         |
| C-C-0.597300   | 0  | -6.162210  | -1.171247 | -3.207408  | L H-H1 56 |
| O-O--0.567900  | 0  | -6.790018  | -2.121721 | -2.724153  | L         |
| C-CT--0.388038 | 0  | -4.200772  | -0.243311 | -1.988424  | H         |
| H-H-0.369964   | 0  | -3.319460  | -0.022263 | -4.378101  | H         |
| H-H1-0.178541  | 0  | -4.351965  | -2.150562 | -2.928506  | H         |
| H-H1-0.157964  | 0  | -4.858282  | -0.520534 | -1.158765  | H         |
| H-H1-0.179833  | 0  | -4.371477  | 0.815189  | -2.202627  | H         |
| H-HS-0.319500  | 0  | -2.377872  | 0.485605  | -0.286897  | H         |
| N-N--0.415700  | 0  | -6.754736  | -0.159785 | -3.829029  | L         |
| C-CT--0.087500 | -1 | -8.194659  | -0.080969 | -4.052083  | L         |
| C-C-0.597300   | 0  | -8.695682  | -1.220832 | -4.927245  | L         |
| O-O--0.567900  | 0  | -9.651858  | -1.904768 | -4.561351  | L         |
| C-CT-0.298500  | 0  | -8.588122  | 1.289180  | -4.620993  | L         |
| C-CT--0.319200 | 0  | -10.105625 | 1.430548  | -4.802629  | L         |
| C-CT--0.319200 | 0  | -8.126105  | 2.447776  | -3.724205  | L         |
| H-H-0.271900   | 0  | -6.119046  | 0.533908  | -4.216409  | L         |
| H-H1-0.096900  | 0  | -8.687653  | -0.187423 | -3.088475  | L         |
| H-HC--0.029700 | 0  | -8.117043  | 1.383718  | -5.590936  | L         |
| H-HC-0.079100  | 0  | -10.608947 | 1.274097  | -3.848276  | L         |
| H-HC-0.079100  | 0  | -10.466769 | 0.700066  | -5.526291  | L         |
| H-HC-0.079100  | 0  | -10.339418 | 2.427017  | -5.176458  | L         |
| H-HC-0.079100  | 0  | -8.572083  | 2.368092  | -2.734342  | L         |
| H-HC-0.079100  | 0  | -8.405421  | 3.401320  | -4.170700  | L         |
| H-HC-0.079100  | 0  | -7.040394  | 2.443386  | -3.616495  | L         |
| N-N--0.415700  | 0  | -8.052267  | -1.440549 | -6.072411  | L         |
| C-CT--0.025200 | -1 | -8.406649  | -2.499246 | -7.013575  | L         |

|                |    |            |           |           |   |
|----------------|----|------------|-----------|-----------|---|
| C-C-0.597300   | 0  | -8.319222  | -3.899756 | -6.420654 | L |
| O-O--0.567900  | 0  | -9.217767  | -4.715877 | -6.615193 | L |
| H-H-0.271900   | 0  | -7.240633  | -0.865714 | -6.261546 | L |
| H-H1-0.069800  | 0  | -7.735192  | -2.449292 | -7.870509 | L |
| H-H1-0.069800  | 0  | -9.425811  | -2.337983 | -7.364280 | L |
| N-N--0.415700  | 0  | -7.236609  | -4.174432 | -5.695818 | L |
| C-CT--0.025200 | -1 | -7.008581  | -5.440231 | -5.009959 | L |
| C-C-0.597300   | 0  | -7.937164  | -5.705129 | -3.835957 | L |
| O-O--0.567900  | 0  | -8.265990  | -6.857967 | -3.561615 | L |
| H-H-0.271900   | 0  | -6.525423  | -3.448010 | -5.626594 | L |
| H-H1-0.069800  | 0  | -5.984376  | -5.455855 | -4.639035 | L |
| H-H1-0.069800  | 0  | -7.126418  | -6.255945 | -5.723380 | L |
| N-N--0.415700  | 0  | -8.327726  | -4.648438 | -3.127882 | L |
| C-CT--0.038900 | -1 | -9.376012  | -4.702671 | -2.106978 | L |
| C-C-0.597300   | 0  | -10.748226 | -4.993061 | -2.705528 | L |
| O-O--0.567900  | 0  | -11.491337 | -5.826712 | -2.187200 | L |
| C-CT-0.365400  | 0  | -9.407428  | -3.397422 | -1.297804 | L |
| O-OH--0.676100 | 0  | -8.164273  | -3.225299 | -0.656106 | L |
| C-CT--0.243800 | 0  | -10.484481 | -3.408868 | -0.213573 | L |
| H-H-0.271900   | 0  | -7.935678  | -3.745599 | -3.375157 | L |
| H-H1-0.100700  | 0  | -9.148167  | -5.516303 | -1.418568 | L |
| H-H1-0.004300  | 0  | -9.582215  | -2.549374 | -1.960196 | L |
| H-HC-0.064200  | 0  | -11.467605 | -3.291791 | -0.668223 | L |
| H-HC-0.064200  | 0  | -10.318075 | -2.585598 | 0.480538  | L |
| H-HC-0.064200  | 0  | -10.454119 | -4.352934 | 0.328265  | L |
| H-HO-0.410200  | 0  | -7.576688  | -2.784759 | -1.302867 | L |
| N-N--0.415700  | 0  | -11.099278 | -4.287170 | -3.781840 | L |
| C-CT--0.149000 | -1 | -12.331414 | -4.483275 | -4.517756 | L |
| H-H-0.271900   | 0  | -10.434390 | -3.603310 | -4.132877 | L |
| H-H1-0.097600  | 0  | -12.410188 | -3.730304 | -5.302932 | L |
| H-H1-0.097600  | 0  | -13.183637 | -4.401273 | -3.841808 | L |
| H-H1-0.097600  | 0  | -12.325867 | -5.475655 | -4.971658 | L |
| N-N2--0.511415 | 0  | 1.931669   | 0.070874  | -1.697308 | H |
| C-CA-0.057801  | 0  | 0.768648   | 0.739407  | -1.668797 | H |
| C-CA-0.063496  | 0  | 0.200458   | 1.285562  | -2.825657 | H |
| C-CA--0.109122 | 0  | 0.880701   | 1.155609  | -4.036246 | H |
| C-CA--0.164490 | 0  | 2.100770   | 0.496445  | -4.054633 | H |
| C-CA-0.098392  | 0  | 2.583078   | -0.039866 | -2.867837 | H |
| C-C-0.541263   | 0  | -1.156071  | 1.898170  | -2.866561 | H |
| O-O--0.574884  | 0  | -1.844490  | 1.774697  | -3.880583 | H |
| H-H4-0.220889  | 0  | 0.267557   | 0.827502  | -0.708611 | H |
| H-HA-0.160434  | 0  | 0.439187   | 1.562846  | -4.938083 | H |
| H-HA-0.142191  | 0  | 2.670159   | 0.392411  | -4.969412 | H |
| H-H4-0.174502  | 0  | 3.511444   | -0.599681 | -2.838013 | H |
| H-H-0.353801   | 0  | -2.450585  | 2.886530  | -1.830047 | H |
| Zn-ZN-0.974537 | 0  | 2.817029   | -1.055780 | -0.010349 | H |
| O-OW--0.834000 | 0  | -2.159989  | -7.215046 | 3.451881  | L |
| H-HW-0.417000  | 0  | -2.662445  | -6.598878 | 2.899801  | L |
| H-HW-0.417000  | 0  | -2.842143  | -7.791688 | 3.834134  | L |
| O-OW--0.783903 | 0  | 1.321112   | -2.544029 | -0.145562 | H |
| H-HW-0.401253  | 0  | 0.927685   | -2.422449 | 0.757365  | H |
| H-HW-0.424111  | 0  | 1.926855   | -3.327564 | -0.178771 | H |
| O-OW--0.834000 | 0  | -3.802961  | -8.470074 | 7.242135  | L |
| H-HW-0.417000  | 0  | -3.815601  | -7.525060 | 7.414990  | L |



|                |   |           |           |           |   |
|----------------|---|-----------|-----------|-----------|---|
| H-HW-0.417000  | 0 | -3.866866 | -8.532902 | 6.277471  | L |
| O-OW--0.834000 | 0 | 7.150419  | -0.010100 | 1.772723  | L |
| H-HW-0.417000  | 0 | 6.848811  | 0.406384  | 2.600816  | L |
| H-HW-0.417000  | 0 | 6.357836  | 0.075161  | 1.218977  | L |
| O-OW--0.834000 | 0 | 7.041937  | -4.951895 | 4.737730  | L |
| H-HW-0.417000  | 0 | 6.092149  | -5.000335 | 4.970004  | L |
| H-HW-0.417000  | 0 | 7.232102  | -5.829852 | 4.405340  | L |
| O-OW--0.834000 | 0 | 8.647501  | -0.915887 | -0.252023 | L |
| H-HW-0.417000  | 0 | 8.156910  | -0.545768 | 0.510409  | L |
| H-HW-0.417000  | 0 | 8.848641  | -0.126513 | -0.775126 | L |
| O-OW--0.834000 | 0 | 12.656862 | -1.073583 | -2.012462 | L |
| H-HW-0.417000  | 0 | 11.798296 | -0.823677 | -2.395288 | L |
| H-HW-0.417000  | 0 | 12.658934 | -2.037233 | -2.118806 | L |
| O-OW--0.834000 | 0 | 8.307280  | -3.286308 | 0.986463  | L |
| H-HW-0.417000  | 0 | 8.519210  | -2.515482 | 0.419394  | L |
| H-HW-0.417000  | 0 | 7.574561  | -2.951241 | 1.513659  | L |
| O-OW--0.834000 | 0 | 4.351492  | -4.880643 | 5.143516  | L |
| H-HW-0.417000  | 0 | 4.088683  | -4.507058 | 6.007450  | L |
| H-HW-0.417000  | 0 | 4.054415  | -4.200374 | 4.527850  | L |
| S-SH--0.326142 | 0 | -2.461620 | -0.526087 | -1.457262 | H |
| O-OW--0.834000 | 0 | -1.492129 | 2.596162  | -1.800287 | H |

**PC<sub>b</sub>**

|                |    |            |           |           |        |
|----------------|----|------------|-----------|-----------|--------|
| C-CT--0.3662   | -1 | -10.314404 | 3.908782  | 4.022547  | L      |
| C-C-0.5972     | 0  | -8.983992  | 3.258714  | 3.777156  | L      |
| O-O--0.5679    | 0  | -8.409130  | 2.685477  | 4.695695  | L      |
| H-HC-0.1123    | 0  | -11.056943 | 3.448919  | 3.373447  | L      |
| H-HC-0.1123    | 0  | -10.235308 | 4.970974  | 3.797574  | L      |
| H-HC-0.1123    | 0  | -10.593383 | 3.768736  | 5.064438  | L      |
| N-N--0.415700  | 0  | -8.521259  | 3.351551  | 2.537621  | L      |
| C-CT--0.059700 | -1 | -7.347460  | 2.641875  | 2.022276  | L      |
| C-C-0.597300   | 0  | -6.201878  | 3.624877  | 1.840792  | L      |
| O-O--0.567900  | 0  | -6.366102  | 4.635909  | 1.164093  | L      |
| C-CT-0.130300  | 0  | -7.696623  | 1.900481  | 0.707623  | L      |
| C-CT--0.043000 | 0  | -8.898156  | 0.940372  | 0.904593  | L      |
| C-CT--0.320400 | 0  | -6.478442  | 1.108011  | 0.204028  | L      |
| C-CT--0.066000 | 0  | -9.415284  | 0.301131  | -0.388999 | L      |
| H-H-0.271900   | 0  | -9.055042  | 3.918476  | 1.887086  | L      |
| H-H1-0.086900  | 0  | -7.036414  | 1.891734  | 2.749254  | L      |
| H-HC-0.018700  | 0  | -7.963420  | 2.641449  | -0.048214 | L      |
| H-HC-0.023600  | 0  | -9.737763  | 1.486288  | 1.333053  | L      |
| H-HC-0.023600  | 0  | -8.621349  | 0.149795  | 1.603258  | L      |
| H-HC-0.088200  | 0  | -6.204172  | 0.328206  | 0.914698  | L      |
| H-HC-0.088200  | 0  | -5.623486  | 1.769624  | 0.057537  | L      |
| H-HC-0.088200  | 0  | -6.693831  | 0.662725  | -0.765232 | L      |
| H-HC-0.018600  | 0  | -9.634728  | 1.075017  | -1.123364 | L      |
| H-HC-0.018600  | 0  | -10.331808 | -0.248043 | -0.176374 | L      |
| H-HC-0.018600  | 0  | -8.678817  | -0.393663 | -0.789654 | L      |
| N-N--0.516300  | 0  | -5.082633  | 3.333980  | 2.499206  | L      |
| C-CT-0.038100  | -1 | -3.781436  | 3.977237  | 2.383375  | L H-HC |
| C-C-0.536600   | 0  | -3.710131  | 5.502225  | 2.167944  | L      |
| O-O--0.581900  | 0  | -2.722608  | 6.038106  | 1.665980  | L      |
| C-CT--0.547145 | 0  | -3.006864  | 3.225842  | 1.273849  | H      |
| C-C-0.532653   | 0  | -2.420997  | 1.890147  | 1.681079  | H      |

30

|                |    |           |           |           |   |
|----------------|----|-----------|-----------|-----------|---|
| O-O2--0.588507 | 0  | -2.571917 | 1.432468  | 2.823406  | H |
| O-O2--0.625559 | 0  | -1.726058 | 1.266354  | 0.761861  | H |
| H-H-0.293600   | 0  | -5.054716 | 2.445742  | 2.982045  | L |
| H-H1-0.088000  | 0  | -3.246582 | 3.807371  | 3.318083  | L |
| H-HC-0.128435  | 0  | -2.144840 | 3.832070  | 0.954947  | H |
| H-HC-0.183556  | 0  | -3.619735 | 3.139675  | 0.369367  | H |
| N-N--0.415700  | 0  | -4.690855 | 6.252709  | 2.647435  | L |
| C-CT--0.025200 | -1 | -4.658975 | 7.695325  | 2.508444  | L |
| C-C-0.597300   | 0  | -3.763624 | 8.339707  | 3.552686  | L |
| O-O--0.567900  | 0  | -4.241536 | 9.002235  | 4.475124  | L |
| H-H-0.271900   | 0  | -5.528725 | 5.757038  | 2.909033  | L |
| H-H1-0.069800  | 0  | -5.668158 | 8.085905  | 2.629677  | L |
| H-H1-0.069800  | 0  | -4.305198 | 7.970302  | 1.513332  | L |
| N-N--0.415700  | 0  | -2.459716 | 8.129662  | 3.406005  | L |
| C-CT--0.038900 | -1 | -1.435299 | 8.558179  | 4.346835  | L |
| C-C-0.597300   | 0  | -0.524790 | 9.637949  | 3.750532  | L |
| O-O--0.567900  | 0  | -0.621262 | 10.004380 | 2.578168  | L |
| C-CT-0.365400  | 0  | -0.592866 | 7.403184  | 4.932462  | L |
| O-OH--0.676100 | 0  | 0.598220  | 7.230530  | 4.206415  | L |
| C-CT--0.243800 | 0  | -1.307748 | 6.060959  | 5.047701  | L |
| H-H-0.271900   | 0  | -2.196717 | 7.534277  | 2.622759  | L |
| H-H1-0.100700  | 0  | -1.939418 | 9.020098  | 5.193758  | L |
| H-H1-0.004300  | 0  | -0.302740 | 7.700703  | 5.940703  | L |
| H-HC-0.064200  | 0  | -2.249255 | 6.190206  | 5.579523  | L |
| H-HC-0.064200  | 0  | -0.675967 | 5.367907  | 5.598012  | L |
| H-HC-0.064200  | 0  | -1.499740 | 5.646239  | 4.058676  | L |
| H-HO-0.410200  | 0  | 1.089303  | 6.473978  | 4.593958  | L |
| N-N--0.415700  | 0  | 0.391286  | 10.151190 | 4.575684  | L |
| C-CT--0.025200 | -1 | 1.431340  | 11.086375 | 4.160166  | L |
| C-C-0.597300   | 0  | 2.332739  | 10.598125 | 3.035187  | L |
| O-O--0.567900  | 0  | 2.668717  | 11.375550 | 2.146815  | L |
| H-H-0.271900   | 0  | 0.452465  | 9.749010  | 5.495667  | L |
| H-H1-0.069800  | 0  | 2.066322  | 11.320667 | 5.013391  | L |
| H-H1-0.069800  | 0  | 0.958603  | 12.009903 | 3.825280  | L |
| N-N--0.516300  | 0  | 2.728131  | 9.328792  | 3.090001  | L |
| C-CT-0.038100  | -1 | 3.636982  | 8.731299  | 2.112714  | L |
| C-C-0.536600   | 0  | 3.006096  | 8.439068  | 0.764560  | L |
| O-O--0.581900  | 0  | 3.738719  | 8.141514  | -0.172617 | L |
| C-CT--0.030300 | 0  | 4.221513  | 7.418016  | 2.664271  | L |
| C-C-0.799400   | -1 | 5.568820  | 7.619149  | 3.339396  | L |
| O-O2--0.801400 | -1 | 6.148604  | 8.723573  | 3.257300  | L |
| O-O2--0.801400 | -1 | 6.029527  | 6.665977  | 4.000027  | L |
| H-H-0.293600   | 0  | 2.352885  | 8.722003  | 3.805095  | L |
| H-H1-0.088000  | 0  | 4.439174  | 9.438163  | 1.898081  | L |
| H-HC--0.012200 | 0  | 4.376740  | 6.702155  | 1.855319  | L |
| H-HC--0.012200 | 0  | 3.519356  | 6.962273  | 3.365596  | L |
| N-N--0.415700  | 0  | 1.684076  | 8.525067  | 0.651740  | L |
| C-CT--0.002400 | -1 | 0.965393  | 8.319742  | -0.598671 | L |
| C-C-0.597300   | 0  | 0.368630  | 9.612966  | -1.155657 | L |
| O-O--0.567900  | 0  | 0.353629  | 9.824532  | -2.368321 | L |
| C-CT--0.034300 | 0  | -0.098707 | 7.228445  | -0.422380 | L |
| C-CA-0.011800  | 0  | 0.428314  | 5.901245  | 0.099925  | L |
| C-CA--0.125600 | 0  | 1.057800  | 4.982703  | -0.760325 | L |
| C-CA--0.125600 | 0  | 0.252004  | 5.566298  | 1.452661  | L |

|                |    |           |           |           |   |
|----------------|----|-----------|-----------|-----------|---|
| C-CA--0.170400 | 0  | 1.490217  | 3.738677  | -0.263473 | L |
| C-CA--0.170400 | 0  | 0.660972  | 4.317434  | 1.946628  | L |
| C-CA--0.107200 | 0  | 1.274878  | 3.399253  | 1.082186  | L |
| H-H-0.271900   | 0  | 1.163941  | 8.724306  | 1.493523  | L |
| H-H1-0.097800  | 0  | 1.655247  | 7.953938  | -1.358399 | L |
| H-HC-0.029500  | 0  | -0.570559 | 7.047873  | -1.389001 | L |
| H-HC-0.029500  | 0  | -0.873324 | 7.595066  | 0.252876  | L |
| H-HA-0.133000  | 0  | 1.173277  | 5.216183  | -1.807735 | L |
| H-HA-0.133000  | 0  | -0.256601 | 6.258608  | 2.098535  | L |
| H-HA-0.143000  | 0  | 1.947622  | 3.017697  | -0.920980 | L |
| H-HA-0.143000  | 0  | 0.462367  | 4.051257  | 2.973582  | L |
| H-HA-0.129700  | 0  | 1.547389  | 2.420495  | 1.442306  | L |
| N-N--0.4157    | 0  | -0.087623 | 10.507743 | -0.276564 | L |
| C-CT--0.1490   | -1 | -0.484574 | 11.853155 | -0.640451 | L |
| H-H-0.2719     | 0  | -0.083605 | 10.246018 | 0.704035  | L |
| H-H1-0.0976    | 0  | -0.872723 | 12.368940 | 0.238280  | L |
| H-H1-0.0976    | 0  | -1.256644 | 11.810743 | -1.410551 | L |
| H-H1-0.0976    | 0  | 0.379774  | 12.394286 | -1.028228 | L |
| C-CT--0.3662   | -1 | 7.975745  | 8.437787  | -0.169819 | L |
| C-C-0.5972     | 0  | 7.514306  | 7.640000  | -1.366707 | L |
| O-O--0.5679    | 0  | 8.336335  | 7.289723  | -2.209992 | L |
| H-HC-0.1123    | 0  | 7.530846  | 9.429816  | -0.202818 | L |
| H-HC-0.1123    | 0  | 9.060493  | 8.513253  | -0.185603 | L |
| H-HC-0.1123    | 0  | 7.664194  | 7.930602  | 0.744234  | L |
| N-N--0.415700  | 0  | 6.204294  | 7.395511  | -1.463722 | L |
| C-CT--0.051800 | -1 | 5.553032  | 6.860517  | -2.667337 | L |
| C-C-0.597300   | 0  | 4.902544  | 7.979150  | -3.481649 | L |
| O-O--0.567900  | 0  | 5.272158  | 8.236694  | -4.627607 | L |
| C-CT--0.110200 | 0  | 4.618280  | 5.677752  | -2.329332 | L |
| C-CT-0.353100  | 0  | 4.651124  | 4.581290  | -3.415092 | L |
| C-CT--0.412100 | 0  | 3.834114  | 3.366403  | -2.992512 | L |
| C-CT--0.412100 | 0  | 4.098447  | 5.033024  | -4.769239 | L |
| H-H-0.271900   | 0  | 5.599364  | 7.717481  | -0.715346 | L |
| H-H1-0.092200  | 0  | 6.342860  | 6.462892  | -3.305815 | L |
| H-HC-0.045700  | 0  | 3.596653  | 6.027791  | -2.178307 | L |
| H-HC-0.045700  | 0  | 4.953460  | 5.225229  | -1.395806 | L |
| H-HC--0.036100 | 0  | 5.682779  | 4.253810  | -3.552157 | L |
| H-HC-0.100000  | 0  | 2.772557  | 3.612855  | -2.983732 | L |
| H-HC-0.100000  | 0  | 4.134877  | 3.039841  | -1.998755 | L |
| H-HC-0.100000  | 0  | 4.006272  | 2.549942  | -3.690836 | L |
| H-HC-0.100000  | 0  | 3.103324  | 5.460467  | -4.640021 | L |
| H-HC-0.100000  | 0  | 4.037892  | 4.183625  | -5.448561 | L |
| H-HC-0.100000  | 0  | 4.757274  | 5.776896  | -5.212808 | L |
| N-N--0.4157    | 0  | 3.966311  | 8.670836  | -2.845874 | L |
| C-CT--0.1490   | -1 | 3.344063  | 9.889837  | -3.293555 | L |
| H-H-0.2719     | 0  | 3.775230  | 8.362377  | -1.899882 | L |
| H-H1-0.0976    | 0  | 4.055276  | 10.484476 | -3.868229 | L |
| H-H1-0.0976    | 0  | 3.003013  | 10.465657 | -2.431950 | L |
| H-H1-0.0976    | 0  | 2.484624  | 9.650881  | -3.922231 | L |
| C-CT--0.3662   | -1 | -8.724860 | 2.365316  | 8.129466  | L |
| C-C-0.5972     | 0  | -7.850212 | 1.157049  | 7.950234  | L |
| O-O--0.5679    | 0  | -7.529272 | 0.476627  | 8.918070  | L |
| H-HC-0.1123    | 0  | -9.642589 | 2.224086  | 7.561834  | L |
| H-HC-0.1123    | 0  | -8.195867 | 3.242984  | 7.761091  | L |

|                |    |           |           |          |            |
|----------------|----|-----------|-----------|----------|------------|
| H-HC-0.1123    | 0  | -8.954060 | 2.486013  | 9.186076 | L          |
| N-N--0.415700  | 0  | -7.459609 | 0.905780  | 6.708875 | L          |
| C-CT--0.038900 | -1 | -6.663081 | -0.251206 | 6.296140 | L          |
| C-C-0.597300   | 0  | -5.392255 | 0.223156  | 5.614185 | L          |
| O-O--0.567900  | 0  | -5.419457 | 0.624606  | 4.451313 | L          |
| C-CT-0.365400  | 0  | -7.474072 | -1.216047 | 5.417281 | L          |
| O-OH--0.676100 | 0  | -8.029625 | -0.551983 | 4.308225 | L          |
| C-CT--0.243800 | 0  | -8.623670 | -1.835445 | 6.217512 | L          |
| H-H-0.271900   | 0  | -7.790507 | 1.525729  | 5.973177 | L          |
| H-H1-0.100700  | 0  | -6.365319 | -0.815131 | 7.179772 | L          |
| H-H1-0.004300  | 0  | -6.817884 | -2.013033 | 5.065265 | L          |
| H-HC-0.064200  | 0  | -8.226081 | -2.368666 | 7.080662 | L          |
| H-HC-0.064200  | 0  | -9.178981 | -2.532719 | 5.596181 | L          |
| H-HC-0.064200  | 0  | -9.309046 | -1.058492 | 6.554523 | L          |
| H-HO-0.410200  | 0  | -7.333338 | 0.020469  | 3.954888 | L          |
| N-N--0.415700  | 0  | -4.306986 | 0.234148  | 6.392541 | L          |
| C-CT--0.059700 | -1 | -3.110605 | 1.045808  | 6.158323 | L          |
| C-C-0.597300   | 0  | -1.862185 | 0.170643  | 6.087969 | L          |
| O-O--0.567900  | 0  | -1.601486 | -0.628294 | 6.992250 | L          |
| C-CT-0.130300  | 0  | -2.982897 | 2.141237  | 7.242336 | L          |
| C-CT--0.043000 | 0  | -4.242696 | 3.029844  | 7.396284 | L          |
| C-CT--0.320400 | 0  | -1.751235 | 3.019031  | 6.974623 | L          |
| C-CT--0.066000 | 0  | -4.688418 | 3.789441  | 6.137675 | L          |
| H-H-0.271900   | 0  | -4.384081 | -0.177521 | 7.308274 | L          |
| H-H1-0.086900  | 0  | -3.214817 | 1.548499  | 5.196681 | L          |
| H-HC-0.018700  | 0  | -2.826266 | 1.646746  | 8.202874 | L          |
| H-HC-0.023600  | 0  | -4.055792 | 3.760851  | 8.183696 | L          |
| H-HC-0.023600  | 0  | -5.074397 | 2.412745  | 7.735409 | L          |
| H-HC-0.088200  | 0  | -1.762854 | 3.362692  | 5.939972 | L          |
| H-HC-0.088200  | 0  | -0.843108 | 2.437141  | 7.134073 | L          |
| H-HC-0.088200  | 0  | -1.736535 | 3.874104  | 7.649160 | L          |
| H-HC-0.018600  | 0  | -3.895594 | 4.448628  | 5.788267 | L          |
| H-HC-0.018600  | 0  | -5.566321 | 4.391353  | 6.372670 | L          |
| H-HC-0.018600  | 0  | -4.952068 | 3.092359  | 5.345370 | L          |
| N-N--0.516300  | 0  | -1.114793 | 0.344961  | 5.001859 | L          |
| C-CT-0.038100  | -1 | 0.185053  | -0.238641 | 4.720621 | L H-HC 178 |
| C-C-0.536600   | 0  | 1.124946  | -0.083125 | 5.921459 | L          |
| O-O--0.581900  | 0  | 1.335203  | 1.008751  | 6.442800 | L          |
| C-CT--0.520019 | 0  | 0.678975  | 0.410451  | 3.415405 | H          |
| C-C-0.636404   | 0  | 1.000038  | -0.557125 | 2.292703 | H          |
| O-O2--0.608036 | 0  | 0.411858  | -1.678066 | 2.215861 | H          |
| O-O2--0.608131 | 0  | 1.844742  | -0.113594 | 1.449940 | H          |
| H-H-0.293600   | 0  | -1.505264 | 0.943460  | 4.279247 | L          |
| H-H1-0.088000  | 0  | 0.030957  | -1.306657 | 4.562244 | L          |
| H-HC-0.132300  | 0  | 1.568063  | 1.009865  | 3.621250 | H          |
| H-HC-0.188993  | 0  | -0.077939 | 1.097474  | 3.021790 | H          |
| N-N--0.415700  | 0  | 1.671560  | -1.194370 | 6.382867 | L          |
| C-CT-0.033700  | -1 | 2.571592  | -1.240332 | 7.512853 | L          |
| C-C-0.597300   | 0  | 3.795465  | -2.057481 | 7.114865 | L          |
| O-O--0.567900  | 0  | 3.852693  | -3.281087 | 7.281500 | L          |
| C-CT--0.182500 | 0  | 1.815570  | -1.800851 | 8.725799 | L          |
| H-H-0.271900   | 0  | 1.368776  | -2.072544 | 5.976435 | L          |
| H-H1-0.082300  | 0  | 2.914369  | -0.234887 | 7.764764 | L          |
| H-HC-0.060300  | 0  | 0.973779  | -1.148311 | 8.960914 | L          |

|                |    |           |            |           |   |      |     |
|----------------|----|-----------|------------|-----------|---|------|-----|
| H-HC-0.060300  | 0  | 2.485754  | -1.849641  | 9.583716  | L |      |     |
| H-HC-0.060300  | 0  | 1.441781  | -2.801191  | 8.501606  | L |      |     |
| N-N--0.4157    | 0  | 4.759429  | -1.362926  | 6.522219  | L |      |     |
| C-CT-0.0188    | -1 | 5.966532  | -1.946028  | 5.981410  | L | H-HC | 200 |
| C-C-0.5973     | 0  | 7.161479  | -1.799833  | 6.933119  | L |      |     |
| O-O--0.5679    | 0  | 7.207180  | -0.952190  | 7.827082  | L |      |     |
| C-CT--0.517456 | 0  | 6.227477  | -1.314896  | 4.612766  | H |      |     |
| C-CM-0.287351  | 0  | 5.359994  | -1.802851  | 3.512422  | H |      |     |
| N-N2--0.586994 | 0  | 5.507448  | -3.058195  | 2.938680  | H |      |     |
| C-CM--0.020338 | 0  | 4.371729  | -1.203655  | 2.784032  | H |      |     |
| C-CM-0.242458  | 0  | 4.633655  | -3.157949  | 1.902145  | H |      |     |
| N-N2--0.505070 | 0  | 3.936196  | -2.043774  | 1.779823  | H |      |     |
| H-H-0.2719     | 0  | 4.649604  | -0.354771  | 6.454324  | L |      |     |
| H-H1-0.0881    | 0  | 5.819343  | -3.012358  | 5.841980  | L |      |     |
| H-HC-0.166355  | 0  | 7.283401  | -1.480614  | 4.353386  | H |      |     |
| H-HC-0.174481  | 0  | 6.112071  | -0.236040  | 4.742050  | H |      |     |
| H-H-0.335795   | 0  | 6.159478  | -3.771307  | 3.258446  | H |      |     |
| H-H4-0.152777  | 0  | 3.964829  | -0.211680  | 2.907402  | H |      |     |
| H-H5-0.209475  | 0  | 4.536008  | -4.026984  | 1.266546  | H |      |     |
| N-N--0.4157    | 0  | 8.166904  | -2.637560  | 6.685491  | L |      |     |
| C-CT--0.1490   | -1 | 9.438800  | -2.564364  | 7.371175  | L |      |     |
| H-H-0.2719     | 0  | 8.014745  | -3.315074  | 5.945008  | L |      |     |
| H-H1-0.0976    | 0  | 10.111506 | -3.332873  | 6.989334  | L |      |     |
| H-H1-0.0976    | 0  | 9.285486  | -2.712000  | 8.441565  | L |      |     |
| H-H1-0.0976    | 0  | 9.883394  | -1.580356  | 7.211451  | L |      |     |
| C-CT--0.3662   | -1 | 8.361372  | -9.383358  | 0.911212  | L |      |     |
| C-C-0.5972     | 0  | 8.739326  | -9.156511  | -0.540167 | L |      |     |
| O-O--0.5679    | 0  | 9.774172  | -8.554866  | -0.800493 | L |      |     |
| H-HC-0.1123    | 0  | 8.280869  | -10.449309 | 1.110537  | L |      |     |
| H-HC-0.1123    | 0  | 7.422206  | -8.876893  | 1.126441  | L |      |     |
| H-HC-0.1123    | 0  | 9.140259  | -8.953961  | 1.541216  | L |      |     |
| N-N--0.254800  | 0  | 7.918888  | -9.612747  | -1.503204 | L |      |     |
| C-CT--0.026600 | -1 | 8.159822  | -9.374866  | -2.928656 | L |      |     |
| C-C-0.589600   | 0  | 8.013316  | -7.901470  | -3.309307 | L |      |     |
| O-O--0.574800  | 0  | 8.727326  | -7.404639  | -4.177225 | L |      |     |
| C-CT--0.007000 | 0  | 7.149405  | -10.265325 | -3.659642 | L |      |     |
| C-CT-0.018900  | 0  | 5.990862  | -10.388759 | -2.668645 | L |      |     |
| C-CT-0.019200  | 0  | 6.685445  | -10.362711 | -1.306269 | L |      |     |
| H-H1-0.064100  | 0  | 9.171068  | -9.687930  | -3.191516 | L |      |     |
| H-HC-0.025300  | 0  | 7.590526  | -11.249629 | -3.823738 | L |      |     |
| H-HC-0.025300  | 0  | 6.827767  | -9.833418  | -4.608641 | L |      |     |
| H-HC-0.021300  | 0  | 5.428024  | -11.310842 | -2.816784 | L |      |     |
| H-HC-0.021300  | 0  | 5.333690  | -9.522672  | -2.761446 | L |      |     |
| H-H1-0.039100  | 0  | 6.039876  | -9.887306  | -0.566412 | L |      |     |
| H-H1-0.039100  | 0  | 6.927668  | -11.380162 | -0.996441 | L |      |     |
| N-N--0.516300  | 0  | 7.089064  | -7.205974  | -2.646343 | L |      |     |
| C-CT-0.039700  | -1 | 6.833478  | -5.779554  | -2.816254 | L |      |     |
| C-C-0.536600   | 0  | 8.091607  | -4.912572  | -2.687755 | L |      |     |
| O-O--0.581900  | 0  | 8.265061  | -3.929377  | -3.411495 | L |      |     |
| C-CT-0.056000  | 0  | 5.736461  | -5.349085  | -1.838661 | L | H-HC | 244 |
| C-CT--0.515956 | 0  | 5.199522  | -3.965973  | -2.214173 | H |      |     |
| C-C-0.587828   | 0  | 4.113126  | -3.438193  | -1.287716 | H |      |     |
| O-O2--0.600319 | 0  | 4.062400  | -2.156370  | -1.233411 | H |      |     |
| O-O2--0.589127 | 0  | 3.355112  | -4.230355  | -0.683483 | H |      |     |

|                |    |           |           |           |   |
|----------------|----|-----------|-----------|-----------|---|
| H-H-0.293600   | 0  | 6.553924  | -7.684240 | -1.940887 | L |
| H-H1-0.110500  | 0  | 6.455397  | -5.625435 | -3.827311 | L |
| H-HC--0.017300 | 0  | 6.133808  | -5.329589 | -0.822626 | L |
| H-HC--0.017300 | 0  | 4.916541  | -6.067768 | -1.885237 | L |
| H-HC-0.167759  | 0  | 4.787475  | -4.017159 | -3.229206 | H |
| H-HC-0.135230  | 0  | 6.019104  | -3.239627 | -2.231758 | H |
| N-N--0.415700  | 0  | 9.002461  | -5.317477 | -1.805158 | L |
| C-CT--0.024900 | -1 | 10.242226 | -4.617471 | -1.490083 | L |
| C-C-0.597300   | 0  | 11.263234 | -4.506369 | -2.615515 | L |
| O-O--0.567900  | 0  | 12.244234 | -3.774603 | -2.481863 | L |
| C-CT-0.211700  | 0  | 10.883351 | -5.255252 | -0.251404 | L |
| O-OH--0.654600 | 0  | 9.927274  | -5.448871 | 0.780614  | L |
| H-H-0.271900   | 0  | 8.792286  | -6.125655 | -1.236049 | L |
| H-H1-0.084300  | 0  | 9.976320  | -3.593622 | -1.222526 | L |
| H-H1-0.035200  | 0  | 11.681791 | -4.607159 | 0.112888  | L |
| H-H1-0.035200  | 0  | 11.310625 | -6.222231 | -0.521193 | L |
| H-HO-0.427500  | 0  | 9.375601  | -4.638958 | 0.862711  | L |
| N-N--0.415700  | 0  | 11.022877 | -5.189685 | -3.732681 | L |
| C-CT-0.033700  | -1 | 11.772354 | -5.025379 | -4.971469 | L |
| C-C-0.597300   | 0  | 10.939942 | -4.466876 | -6.130227 | L |
| O-O--0.567900  | 0  | 11.374319 | -4.474807 | -7.281264 | L |
| C-CT--0.182500 | 0  | 12.398305 | -6.386685 | -5.307963 | L |
| H-H-0.271900   | 0  | 10.208591 | -5.793620 | -3.740509 | L |
| H-H1-0.082300  | 0  | 12.588482 | -4.318307 | -4.816748 | L |
| H-HC-0.060300  | 0  | 13.014726 | -6.726093 | -4.474819 | L |
| H-HC-0.060300  | 0  | 13.024272 | -6.294698 | -6.196198 | L |
| H-HC-0.060300  | 0  | 11.611631 | -7.118517 | -5.498439 | L |
| N-N--0.415700  | 0  | 9.758915  | -3.952576 | -5.804919 | L |
| C-CT--0.025200 | -1 | 8.855261  | -3.269861 | -6.707948 | L |
| C-C-0.597300   | 0  | 8.806986  | -1.766016 | -6.487075 | L |
| O-O--0.567900  | 0  | 8.826222  | -0.992841 | -7.441939 | L |
| H-H-0.271900   | 0  | 9.479305  | -4.011792 | -4.831963 | L |
| H-H1-0.069800  | 0  | 7.848676  | -3.661627 | -6.564798 | L |
| H-H1-0.069800  | 0  | 9.145079  | -3.452466 | -7.743188 | L |
| N-N--0.415700  | 0  | 8.743943  | -1.360907 | -5.221856 | L |
| C-CT--0.002400 | -1 | 8.572824  | 0.024180  | -4.800249 | L |
| C-C-0.597300   | 0  | 9.690740  | 0.457925  | -3.845169 | L |
| O-O--0.567900  | 0  | 10.318049 | -0.393889 | -3.206731 | L |
| C-CT--0.034300 | 0  | 7.187609  | 0.145515  | -4.138999 | L |
| C-CA-0.011800  | 0  | 6.038010  | -0.103402 | -5.098031 | L |
| C-CA--0.125600 | 0  | 5.623689  | 0.912908  | -5.980069 | L |
| C-CA--0.125600 | 0  | 5.409897  | -1.362602 | -5.141678 | L |
| C-CA--0.170400 | 0  | 4.597899  | 0.666814  | -6.910743 | L |
| C-CA--0.170400 | 0  | 4.380495  | -1.606556 | -6.068146 | L |
| C-CA--0.107200 | 0  | 3.979648  | -0.595415 | -6.958986 | L |
| H-H-0.271900   | 0  | 8.744982  | -2.068790 | -4.496963 | L |
| H-H1-0.097800  | 0  | 8.599484  | 0.675449  | -5.674068 | L |
| H-HC-0.029500  | 0  | 7.065814  | 1.139286  | -3.708992 | L |
| H-HC-0.029500  | 0  | 7.130301  | -0.567169 | -3.314640 | L |
| H-HA-0.133000  | 0  | 6.097950  | 1.883167  | -5.950697 | L |
| H-HA-0.133000  | 0  | 5.724645  | -2.147413 | -4.469557 | L |
| H-HA-0.143000  | 0  | 4.280935  | 1.449683  | -7.585140 | L |
| H-HA-0.143000  | 0  | 3.893669  | -2.570541 | -6.093678 | L |
| H-HA-0.129700  | 0  | 3.183201  | -0.782729 | -7.665813 | L |

|                |    |           |           |           |            |
|----------------|----|-----------|-----------|-----------|------------|
| N-N--0.254800  | 0  | 9.946367  | 1.771397  | -3.699850 | L          |
| C-CT--0.026600 | -1 | 10.810859 | 2.265136  | -2.634333 | L          |
| C-C-0.589600   | 0  | 10.178458 | 2.014908  | -1.256575 | L          |
| O-O--0.574800  | 0  | 8.985887  | 1.703425  | -1.176915 | L          |
| C-CT--0.007000 | 0  | 10.968361 | 3.765238  | -2.916122 | L          |
| C-CT-0.018900  | 0  | 9.649221  | 4.133702  | -3.592950 | L          |
| C-CT-0.019200  | 0  | 9.338367  | 2.886451  | -4.420201 | L          |
| H-H1-0.064100  | 0  | 11.780792 | 1.772166  | -2.691454 | L          |
| H-HC-0.025300  | 0  | 11.791217 | 3.919740  | -3.615553 | L          |
| H-HC-0.025300  | 0  | 11.128181 | 4.349032  | -2.008291 | L          |
| H-HC-0.021300  | 0  | 9.744737  | 5.023077  | -4.216613 | L          |
| H-HC-0.021300  | 0  | 8.874385  | 4.277708  | -2.837240 | L          |
| H-H1-0.039100  | 0  | 8.259841  | 2.776881  | -4.524199 | L          |
| H-H1-0.039100  | 0  | 9.800868  | 2.973659  | -5.404160 | L          |
| N-N--0.254800  | 0  | 10.944140 | 2.132630  | -0.161494 | L          |
| C-CT--0.026600 | -1 | 10.391084 | 2.119116  | 1.185800  | L          |
| C-C-0.589600   | 0  | 9.340411  | 3.204362  | 1.421762  | L          |
| O-O--0.574800  | 0  | 9.604040  | 4.384625  | 1.203806  | L          |
| C-CT--0.007000 | 0  | 11.591257 | 2.300778  | 2.126017  | L          |
| C-CT-0.018900  | 0  | 12.778351 | 1.817413  | 1.296483  | L          |
| C-CT-0.019200  | 0  | 12.393733 | 2.237725  | -0.119123 | L          |
| H-H1-0.064100  | 0  | 9.949406  | 1.137763  | 1.364819  | L          |
| H-HC-0.025300  | 0  | 11.475068 | 1.718310  | 3.040534  | L          |
| H-HC-0.025300  | 0  | 11.733542 | 3.356072  | 2.366091  | L          |
| H-HC-0.021300  | 0  | 12.844012 | 0.729275  | 1.348455  | L          |
| H-HC-0.021300  | 0  | 13.713586 | 2.277537  | 1.616301  | L          |
| H-H1-0.039100  | 0  | 12.689070 | 3.273207  | -0.293759 | L          |
| H-H1-0.039100  | 0  | 12.871010 | 1.574604  | -0.841451 | L          |
| N-N--0.4157    | 0  | 8.171356  | 2.779341  | 1.890702  | L          |
| C-CT-0.0188    | -1 | 7.013790  | 3.606538  | 2.185849  | L H-HC 334 |
| C-C-0.5973     | 0  | 6.152111  | 3.012879  | 3.297917  | L          |
| O-O--0.5679    | 0  | 6.179183  | 1.804796  | 3.532152  | L          |
| C-CT--0.515368 | 0  | 6.194596  | 3.723299  | 0.872799  | H          |
| C-CM-0.287903  | 0  | 5.605443  | 2.441558  | 0.363329  | H          |
| N-N2--0.582625 | 0  | 6.224363  | 1.661895  | -0.600374 | H          |
| C-CM--0.036893 | 0  | 4.498609  | 1.707034  | 0.720803  | H          |
| C-CM-0.243454  | 0  | 5.503254  | 0.525048  | -0.778110 | H          |
| N-N2--0.523998 | 0  | 4.451918  | 0.517604  | 0.020503  | H          |
| H-H-0.2719     | 0  | 8.032327  | 1.782218  | 1.969870  | L          |
| H-H1-0.0881    | 0  | 7.345954  | 4.601856  | 2.496225  | L          |
| H-HC-0.162301  | 0  | 6.850397  | 4.179068  | 0.116635  | H          |
| H-HC-0.188340  | 0  | 5.398207  | 4.456219  | 1.051984  | H          |
| H-H-0.339448   | 0  | 7.128865  | 1.871287  | -1.022818 | H          |
| H-H4-0.185957  | 0  | 3.739911  | 1.956988  | 1.446788  | H          |
| H-H5-0.211295  | 0  | 5.775464  | -0.262838 | -1.465035 | H          |
| N-N--0.415700  | 0  | 5.371558  | 3.872617  | 3.940240  | L          |
| C-CT-0.014300  | -1 | 4.551323  | 3.591465  | 5.109363  | L          |
| C-C-0.597300   | 0  | 5.204860  | 2.640682  | 6.122628  | L          |
| O-O--0.567900  | 0  | 4.681221  | 1.588628  | 6.493674  | L          |
| C-CT--0.204100 | 0  | 3.083681  | 3.348854  | 4.736485  | L          |
| C-C-0.713000   | 0  | 2.197208  | 4.191372  | 5.636887  | L          |
| N-N--0.919100  | 0  | 1.703028  | 3.669110  | 6.724895  | L          |
| O-O--0.593100  | 0  | 1.978447  | 5.368747  | 5.412507  | L          |
| H-H-0.271900   | 0  | 5.500950  | 4.859368  | 3.709879  | L          |

|                |    |           |           |           |        |
|----------------|----|-----------|-----------|-----------|--------|
| H-H1-0.104800  | 0  | 4.550868  | 4.549707  | 5.634279  | L      |
| H-HC-0.079700  | 0  | 2.844372  | 2.295368  | 4.834859  | L      |
| H-HC-0.079700  | 0  | 2.900021  | 3.657962  | 3.708181  | L      |
| H-H-0.419600   | 0  | 1.068941  | 4.231297  | 7.250110  | L      |
| H-H-0.419600   | 0  | 1.751646  | 2.654241  | 6.813391  | L      |
| N-N--0.4157    | 0  | 6.392273  | 3.072477  | 6.560837  | L      |
| C-CT--0.1490   | -1 | 7.298513  | 2.332596  | 7.417705  | L      |
| H-H-0.2719     | 0  | 6.703253  | 3.945857  | 6.158365  | L      |
| H-H1-0.0976    | 0  | 8.052702  | 2.998728  | 7.836183  | L      |
| H-H1-0.0976    | 0  | 7.785899  | 1.545601  | 6.839028  | L      |
| H-H1-0.0976    | 0  | 6.739598  | 1.858871  | 8.227828  | L      |
| C-CT--0.3662   | -1 | -2.244745 | -2.743127 | 9.535945  | L      |
| C-C-0.5972     | 0  | -2.366394 | -3.837326 | 8.511083  | L      |
| O-O--0.5679    | 0  | -2.896293 | -4.904268 | 8.809513  | L      |
| H-HC-0.1123    | 0  | -1.191613 | -2.516516 | 9.690817  | L      |
| H-HC-0.1123    | 0  | -2.693866 | -3.076868 | 10.468891 | L      |
| H-HC-0.1123    | 0  | -2.760618 | -1.856037 | 9.173162  | L      |
| N-N--0.347900  | 0  | -1.847066 | -3.574781 | 7.315237  | L      |
| C-CT--0.240000 | -1 | -1.739936 | -4.541982 | 6.216605  | L      |
| C-C-0.734100   | 0  | -0.326335 | -4.581860 | 5.647990  | L      |
| O-O--0.589400  | 0  | 0.494147  | -3.708772 | 5.915720  | L      |
| C-CT--0.009400 | 0  | -2.820310 | -4.245671 | 5.154994  | L      |
| C-CT-0.018700  | 0  | -2.591745 | -2.946952 | 4.370754  | L H-HC |
| C-CT--0.464524 | 0  | -3.654506 | -2.760450 | 3.281151  | H      |
| C-CT--0.195159 | 0  | -3.544850 | -1.433879 | 2.538816  | H      |
| N-N3--0.748751 | 0  | -2.304848 | -1.326132 | 1.698564  | H      |
| H-H-0.274700   | 0  | -1.461009 | -2.643393 | 7.175015  | L      |
| H-H1-0.142600  | 0  | -1.936443 | -5.537432 | 6.615278  | L      |
| H-HC-0.036200  | 0  | -3.793830 | -4.196970 | 5.645798  | L      |
| H-HC-0.036200  | 0  | -2.857404 | -5.065544 | 4.444826  | L      |
| H-HC-0.010300  | 0  | -1.605860 | -2.963760 | 3.906286  | L      |
| H-HC-0.010300  | 0  | -2.652870 | -2.109423 | 5.057835  | L      |
| H-HC-0.173903  | 0  | -4.640582 | -2.792397 | 3.754071  | H      |
| H-HC-0.148535  | 0  | -3.605984 | -3.604606 | 2.579720  | H      |
| H-HP-0.236066  | 0  | -3.553555 | -0.567892 | 3.198684  | H      |
| H-HP-0.172509  | 0  | -4.382501 | -1.330681 | 1.838556  | H      |
| H-H-0.437293   | 0  | -2.125474 | -0.330533 | 1.393975  | H      |
| H-H-0.366736   | 0  | -2.429879 | -1.871506 | 0.834277  | H      |
| H-H-0.419451   | 0  | -1.415956 | -1.619727 | 2.157245  | H      |
| N-N--0.415700  | 0  | -0.032105 | -5.611288 | 4.866703  | L      |
| C-CT--0.025200 | -1 | 1.280762  | -5.807970 | 4.261321  | L      |
| C-C-0.597300   | 0  | 1.153740  | -6.524538 | 2.916339  | L      |
| O-O--0.567900  | 0  | 1.742378  | -7.578674 | 2.684636  | L      |
| H-H-0.271900   | 0  | -0.776915 | -6.261853 | 4.634802  | L      |
| H-H1-0.069800  | 0  | 1.904691  | -6.408222 | 4.923585  | L      |
| H-H1-0.069800  | 0  | 1.770314  | -4.848377 | 4.091143  | L      |
| N-N--0.415700  | 0  | 0.333099  | -5.941368 | 2.046858  | L      |
| C-CT--0.025200 | -1 | -0.231567 | -6.541924 | 0.841723  | L      |
| C-C-0.597300   | 0  | -1.379710 | -5.673928 | 0.393970  | L      |
| O-O--0.567900  | 0  | -2.279403 | -5.440822 | 1.192964  | L      |
| H-H-0.271900   | 0  | -0.109308 | -5.092153 | 2.372327  | L      |
| H-H1-0.069800  | 0  | -0.603818 | -7.541167 | 1.067470  | L      |
| H-H1-0.069800  | 0  | 0.533148  | -6.597113 | 0.066419  | L      |
| N-N--0.4157    | 0  | -1.328260 | -5.198048 | -0.850478 | L      |



|                |    |           |            |           |   |
|----------------|----|-----------|------------|-----------|---|
| C-CT--0.0014   | -1 | -2.160722 | -4.110895  | -1.370437 | L |
| C-C-0.5973     | 0  | -3.625389 | -4.184848  | -0.919085 | L |
| O-O--0.5679    | 0  | -4.186276 | -3.227795  | -0.395072 | L |
| C-CT--0.0152   | 0  | -2.057025 | -4.076913  | -2.909476 | L |
| C-CA--0.0011   | 0  | -0.667248 | -4.290448  | -3.485221 | L |
| C-CA--0.1906   | 0  | 0.355812  | -3.353615  | -3.242780 | L |
| C-CA--0.1906   | 0  | -0.401928 | -5.431228  | -4.269678 | L |
| C-CA--0.2341   | 0  | 1.641746  | -3.559226  | -3.778826 | L |
| C-CA--0.2341   | 0  | 0.881603  | -5.638363  | -4.809650 | L |
| C-C-0.3226     | 0  | 1.907410  | -4.699590  | -4.563682 | L |
| O-OH--0.5579   | 0  | 3.141378  | -4.898036  | -5.099209 | L |
| H-H-0.2719     | 0  | -0.495763 | -5.390640  | -1.389243 | L |
| H-H1-0.0876    | 0  | -1.742362 | -3.185997  | -0.979952 | L |
| H-HC-0.0295    | 0  | -2.422316 | -3.117020  | -3.267826 | L |
| H-HC-0.0295    | 0  | -2.720061 | -4.836960  | -3.323349 | L |
| H-HA-0.1699    | 0  | 0.159334  | -2.466201  | -2.649695 | L |
| H-HA-0.1699    | 0  | -1.192533 | -6.137826  | -4.475371 | L |
| H-HA-0.1656    | 0  | 2.425225  | -2.841295  | -3.590862 | L |
| H-HA-0.1656    | 0  | 1.075845  | -6.505078  | -5.419652 | L |
| H-HO-0.3992    | 0  | 3.146325  | -5.667186  | -5.666186 | L |
| N-N--0.415700  | 0  | -4.226640 | -5.364185  | -1.090686 | L |
| C-CT--0.024900 | -1 | -5.559689 | -5.655093  | -0.583596 | L |
| C-C-0.597300   | 0  | -5.687082 | -5.581710  | 0.936265  | L |
| O-O--0.567900  | 0  | -5.069317 | -6.355833  | 1.677080  | L |
| C-CT-0.211700  | 0  | -6.026475 | -7.046236  | -1.015367 | L |
| O-OH--0.654600 | -1 | -7.278786 | -7.356302  | -0.418600 | L |
| H-H-0.271900   | 0  | -3.656645 | -6.098711  | -1.469225 | L |
| H-H1-0.084300  | 0  | -6.246986 | -4.930212  | -1.020063 | L |
| H-H1-0.035200  | 0  | -5.290373 | -7.785951  | -0.698435 | L |
| H-H1-0.035200  | 0  | -6.114759 | -7.078455  | -2.101357 | L |
| H-HO-0.427500  | -1 | -7.536045 | -8.229209  | -0.725433 | L |
| N-N--0.415700  | 0  | -6.655010 | -4.774870  | 1.364952  | L |
| C-CT-0.033700  | -1 | -7.155084 | -4.678601  | 2.725279  | L |
| C-C-0.597300   | 0  | -7.522854 | -6.001086  | 3.403169  | L |
| O-O--0.567900  | 0  | -7.492196 | -6.093279  | 4.628735  | L |
| C-CT--0.182500 | 0  | -8.337730 | -3.709522  | 2.724805  | L |
| H-H-0.271900   | 0  | -7.100743 | -4.182582  | 0.670668  | L |
| H-H1-0.082300  | 0  | -6.366235 | -4.235595  | 3.332665  | L |
| H-HC-0.060300  | 0  | -8.040082 | -2.748464  | 2.301156  | L |
| H-HC-0.060300  | 0  | -8.679044 | -3.558265  | 3.744311  | L |
| H-HC-0.060300  | 0  | -9.156429 | -4.128475  | 2.145770  | L |
| N-N--0.415700  | 0  | -7.885491 | -7.017047  | 2.619543  | L |
| C-CT--0.025200 | -1 | -8.277793 | -8.324493  | 3.130613  | L |
| C-C-0.597300   | 0  | -7.309378 | -9.459203  | 2.826738  | L |
| O-O--0.567900  | 0  | -7.707466 | -10.622179 | 2.852831  | L |
| H-H-0.271900   | 0  | -7.845626 | -6.857927  | 1.619059  | L |
| H-H1-0.069800  | 0  | -9.240451 | -8.587879  | 2.693679  | L |
| H-H1-0.069800  | 0  | -8.412478 | -8.288381  | 4.211896  | L |
| N-N--0.415700  | 0  | -6.039631 | -9.145479  | 2.574975  | L |
| C-CT--0.024900 | -1 | -4.960750 | -10.131506 | 2.606390  | L |
| C-C-0.597300   | 0  | -4.272079 | -10.091134 | 3.964744  | L |
| O-O--0.567900  | 0  | -3.962246 | -9.014812  | 4.484827  | L |
| C-CT-0.211700  | 0  | -3.958092 | -9.832489  | 1.486515  | L |
| O-OH--0.654600 | -1 | -3.082657 | -10.931545 | 1.287403  | L |

|                |    |            |            |           |   |      |     |
|----------------|----|------------|------------|-----------|---|------|-----|
| H-H-0.271900   | 0  | -5.792748  | -8.159575  | 2.572878  | L |      |     |
| H-H1-0.084300  | 0  | -5.365385  | -11.129227 | 2.435902  | L |      |     |
| H-H1-0.035200  | 0  | -3.386465  | -8.934505  | 1.726841  | L |      |     |
| H-H1-0.035200  | 0  | -4.507951  | -9.657592  | 0.560919  | L |      |     |
| H-HO-0.427500  | -1 | -2.542860  | -10.743237 | 0.516164  | L |      |     |
| N-N--0.4157    | 0  | -4.063619  | -11.268578 | 4.552868  | L |      |     |
| C-CT--0.1490   | -1 | -3.520733  | -11.414950 | 5.892075  | L |      |     |
| H-H-0.2719     | 0  | -4.336536  | -12.087919 | 4.033952  | L |      |     |
| H-H1-0.0976    | 0  | -3.295508  | -12.461352 | 6.097749  | L |      |     |
| H-H1-0.0976    | 0  | -4.241854  | -11.049539 | 6.626543  | L |      |     |
| H-H1-0.0976    | 0  | -2.605312  | -10.826232 | 5.989079  | L |      |     |
| C-CT--0.3662   | -1 | -12.148229 | 5.071702   | -0.649710 | L |      |     |
| C-C-0.5972     | 0  | -10.719272 | 5.257430   | -0.211502 | L |      |     |
| O-O--0.5679    | 0  | -10.404908 | 4.992137   | 0.943399  | L |      |     |
| H-HC-0.1123    | 0  | -12.542128 | 6.022359   | -1.002163 | L |      |     |
| H-HC-0.1123    | 0  | -12.733478 | 4.723175   | 0.199543  | L |      |     |
| H-HC-0.1123    | 0  | -12.181219 | 4.327339   | -1.443164 | L |      |     |
| N-N--0.415700  | 0  | -9.870606  | 5.702796   | -1.134067 | L |      |     |
| C-CT--0.025200 | -1 | -8.437235  | 5.864905   | -0.905897 | L |      |     |
| C-C-0.597300   | 0  | -7.617976  | 5.793471   | -2.169984 | L |      |     |
| O-O--0.567900  | 0  | -8.118735  | 6.142715   | -3.246078 | L |      |     |
| H-H-0.271900   | 0  | -10.181264 | 5.865985   | -2.079339 | L |      |     |
| H-H1-0.069800  | 0  | -8.118819  | 5.055356   | -0.258784 | L |      |     |
| H-H1-0.069800  | 0  | -8.237721  | 6.813708   | -0.409930 | L |      |     |
| N-N--0.415700  | 0  | -6.369764  | 5.351398   | -2.004525 | L | H-H1 | 489 |
| C-CT--0.530209 | -1 | -5.354334  | 5.291208   | -3.053168 | H |      |     |
| C-C-0.568093   | 0  | -4.662006  | 3.940441   | -2.965834 | H |      |     |
| O-O--0.528105  | 0  | -4.694036  | 3.270275   | -1.931463 | H |      |     |
| C-CT-0.298500  | 0  | -4.383413  | 6.491661   | -2.958037 | L | H-H1 | 489 |
| C-CT--0.319200 | 0  | -5.111926  | 7.811542   | -3.224115 | L |      |     |
| C-CT--0.319200 | 0  | -3.675029  | 6.569841   | -1.603436 | L |      |     |
| H-H-0.271900   | 0  | -6.079961  | 5.022822   | -1.085731 | L |      |     |
| H-H1-0.184096  | 0  | -5.870969  | 5.384009   | -4.016116 | H |      |     |
| H-HC--0.029700 | 0  | -3.624284  | 6.385203   | -3.731060 | L |      |     |
| H-HC-0.079100  | 0  | -5.819566  | 8.015705   | -2.422427 | L |      |     |
| H-HC-0.079100  | 0  | -5.645826  | 7.746510   | -4.170844 | L |      |     |
| H-HC-0.079100  | 0  | -4.383945  | 8.620022   | -3.274966 | L |      |     |
| H-HC-0.079100  | 0  | -4.395276  | 6.685757   | -0.795580 | L |      |     |
| H-HC-0.079100  | 0  | -2.984042  | 7.410051   | -1.594409 | L |      |     |
| H-HC-0.079100  | 0  | -3.108524  | 5.651950   | -1.433020 | L |      |     |
| N-N--0.610103  | 0  | -3.979962  | 3.556392   | -4.073217 | H |      |     |
| C-CT--0.314060 | -1 | -4.243468  | 3.998804   | -5.430312 | H |      |     |
| C-C-0.597300   | 0  | -5.356751  | 3.173837   | -6.068160 | L | H-H1 | 505 |
| O-O--0.567900  | 0  | -5.482491  | 1.967577   | -5.855602 | L |      |     |
| C-CT--0.110200 | 0  | -2.951010  | 3.914577   | -6.280246 | L | H-H1 | 505 |
| C-CT-0.353100  | 0  | -1.957395  | 5.081325   | -6.064764 | L |      |     |
| C-CT--0.412100 | 0  | -1.080788  | 4.960330   | -4.818068 | L |      |     |
| C-CT--0.412100 | 0  | -1.009853  | 5.179797   | -7.265411 | L |      |     |
| H-H-0.398207   | 0  | -3.436247  | 2.706300   | -3.971572 | H |      |     |
| H-H1-0.165130  | 0  | -4.559187  | 5.041636   | -5.431586 | H |      |     |
| H-HC-0.045700  | 0  | -3.250958  | 3.929517   | -7.328013 | L |      |     |
| H-HC-0.045700  | 0  | -2.448027  | 2.964580   | -6.104698 | L |      |     |
| H-HC--0.036100 | 0  | -2.517559  | 6.015591   | -6.012000 | L |      |     |
| H-HC-0.100000  | 0  | -0.462761  | 4.066457   | -4.878965 | L |      |     |

|                |    |            |           |            |   |      |     |
|----------------|----|------------|-----------|------------|---|------|-----|
| H-HC-0.100000  | 0  | -1.707840  | 4.875992  | -3.929622  | L |      |     |
| H-HC-0.100000  | 0  | -0.449196  | 5.840133  | -4.710244  | L |      |     |
| H-HC-0.100000  | 0  | -0.436491  | 4.257847  | -7.355412  | L |      |     |
| H-HC-0.100000  | 0  | -0.326008  | 6.015805  | -7.120837  | L |      |     |
| H-HC-0.100000  | 0  | -1.583107  | 5.345027  | -8.175688  | L |      |     |
| N-N--0.415700  | 0  | -6.146920  | 3.824739  | -6.916997  | L |      |     |
| C-CT--0.038900 | -1 | -7.336216  | 3.227923  | -7.536112  | L |      |     |
| C-C-0.597300   | 0  | -7.090985  | 1.891686  | -8.226757  | L |      |     |
| O-O--0.567900  | 0  | -7.972867  | 1.036089  | -8.272429  | L |      |     |
| C-CT-0.365400  | -1 | -7.974968  | 4.151999  | -8.597264  | L |      |     |
| O-OH--0.676100 | -1 | -7.913640  | 5.509233  | -8.149373  | L |      |     |
| C-CT--0.243800 | 0  | -9.453708  | 3.862059  | -8.854814  | L |      |     |
| H-H-0.271900   | 0  | -6.023418  | 4.823089  | -6.998468  | L |      |     |
| H-H1-0.100700  | 0  | -8.074892  | 3.086488  | -6.754108  | L |      |     |
| H-H1-0.004300  | 0  | -7.420678  | 4.076108  | -9.533749  | L |      |     |
| H-HC-0.064200  | 0  | -9.569735  | 2.858526  | -9.263670  | L |      |     |
| H-HC-0.064200  | 0  | -9.848639  | 4.576495  | -9.576866  | L |      |     |
| H-HC-0.064200  | 0  | -10.016078 | 3.932562  | -7.922956  | L |      |     |
| H-HO-0.410200  | -1 | -8.811994  | 5.843935  | -8.113091  | L |      |     |
| N-N--0.415700  | 0  | -5.914207  | 1.755483  | -8.834722  | L |      |     |
| C-CT--0.025200 | -1 | -5.529531  | 0.599683  | -9.631301  | L |      |     |
| C-C-0.597300   | 0  | -4.637027  | -0.408976 | -8.937344  | L |      |     |
| O-O--0.567900  | 0  | -4.141440  | -1.311511 | -9.612896  | L |      |     |
| H-H-0.271900   | 0  | -5.226214  | 2.467873  | -8.641219  | L |      |     |
| H-H1-0.069800  | 0  | -4.996777  | 0.947930  | -10.514953 | L |      |     |
| H-H1-0.069800  | 0  | -6.418603  | 0.068523  | -9.970945  | L |      |     |
| N-N--0.415700  | 0  | -4.425344  | -0.238071 | -7.627524  | L | H-H1 | 545 |
| C-CT--0.539097 | -1 | -3.482857  | -1.010239 | -6.829082  | H |      |     |
| C-C-0.572106   | 0  | -4.212923  | -1.475975 | -5.569499  | H |      |     |
| O-O--0.533001  | 0  | -4.924405  | -2.474844 | -5.636640  | H |      |     |
| C-CT-0.130300  | 0  | -2.146908  | -0.243746 | -6.626128  | L | H-H1 | 545 |
| C-CT--0.043000 | 0  | -1.543774  | 0.277288  | -7.952591  | L |      |     |
| C-CT--0.320400 | 0  | -1.168560  | -1.208252 | -5.933168  | L |      |     |
| C-CT--0.066000 | 0  | -0.230928  | 1.055905  | -7.792162  | L |      |     |
| H-H-0.271900   | 0  | -4.889173  | 0.533535  | -7.155994  | L |      |     |
| H-H1-0.180646  | 0  | -3.254900  | -1.924429 | -7.387139  | H |      |     |
| H-HC-0.018700  | 0  | -2.324018  | 0.612482  | -5.976890  | L |      |     |
| H-HC-0.023600  | 0  | -2.253591  | 0.960012  | -8.418137  | L |      |     |
| H-HC-0.023600  | 0  | -1.380283  | -0.560698 | -8.631268  | L |      |     |
| H-HC-0.088200  | 0  | -0.963576  | -2.064069 | -6.574538  | L |      |     |
| H-HC-0.088200  | 0  | -1.585449  | -1.559949 | -4.991109  | L |      |     |
| H-HC-0.088200  | 0  | -0.237919  | -0.701057 | -5.691858  | L |      |     |
| H-HC-0.018600  | 0  | -0.356050  | 1.839650  | -7.045464  | L |      |     |
| H-HC-0.018600  | 0  | 0.035154   | 1.512828  | -8.745306  | L |      |     |
| H-HC-0.018600  | 0  | 0.576474   | 0.388948  | -7.491359  | L |      |     |
| N-N--0.611145  | 0  | -4.075608  | -0.718882 | -4.446630  | H |      |     |
| C-CT--0.109296 | -1 | -4.643963  | -1.112497 | -3.166014  | H |      |     |
| C-C-0.597300   | 0  | -6.171156  | -1.142131 | -3.181817  | L | H-H1 | 564 |
| O-O--0.567900  | 0  | -6.800349  | -2.084188 | -2.684255  | L |      |     |
| C-CT--0.388038 | 0  | -4.127217  | -0.289846 | -2.006450  | H |      |     |
| H-H-0.369964   | 0  | -3.450558  | 0.076434  | -4.431266  | H |      |     |
| H-H1-0.178541  | 0  | -4.384480  | -2.159977 | -2.977167  | H |      |     |
| H-H1-0.157964  | 0  | -4.728321  | -0.569904 | -1.136116  | H |      |     |
| H-H1-0.179833  | 0  | -4.231096  | 0.787428  | -2.160685  | H |      |     |

|                |    |            |           |           |   |
|----------------|----|------------|-----------|-----------|---|
| H-HS-0.319500  | 0  | -2.234797  | 0.182342  | -0.682205 | H |
| N-N--0.415700  | 0  | -6.763724  | -0.140597 | -3.818899 | L |
| C-CT--0.087500 | -1 | -8.202025  | -0.074434 | -4.058870 | L |
| C-C-0.597300   | 0  | -8.690924  | -1.222612 | -4.928919 | L |
| O-O--0.567900  | 0  | -9.637157  | -1.916995 | -4.557323 | L |
| C-CT-0.298500  | 0  | -8.598580  | 1.290494  | -4.641156 | L |
| C-CT--0.319200 | 0  | -10.115522 | 1.422001  | -4.834820 | L |
| C-CT--0.319200 | 0  | -8.149397  | 2.462596  | -3.754523 | L |
| H-H-0.271900   | 0  | -6.129873  | 0.555394  | -4.204482 | L |
| H-H1-0.096900  | 0  | -8.702750  | -0.175922 | -3.098541 | L |
| H-HC--0.029700 | 0  | -8.121466  | 1.378701  | -5.608805 | L |
| H-HC-0.079100  | 0  | -10.624478 | 1.271934  | -3.882431 | L |
| H-HC-0.079100  | 0  | -10.467819 | 0.682802  | -5.553945 | L |
| H-HC-0.079100  | 0  | -10.351893 | 2.413611  | -5.219688 | L |
| H-HC-0.079100  | 0  | -8.602996  | 2.394005  | -2.767698 | L |
| H-HC-0.079100  | 0  | -8.424111  | 3.412329  | -4.212623 | L |
| H-HC-0.079100  | 0  | -7.065244  | 2.459126  | -3.635059 | L |
| N-N--0.415700  | 0  | -8.053868  | -1.434837 | -6.079093 | L |
| C-CT--0.025200 | -1 | -8.413516  | -2.491713 | -7.021212 | L |
| C-C-0.597300   | 0  | -8.322402  | -3.893362 | -6.431441 | L |
| O-O--0.567900  | 0  | -9.219693  | -4.710384 | -6.628099 | L |
| H-H-0.271900   | 0  | -7.255336  | -0.845709 | -6.278855 | L |
| H-H1-0.069800  | 0  | -7.747018  | -2.439897 | -7.881874 | L |
| H-H1-0.069800  | 0  | -9.434743  | -2.330006 | -7.365687 | L |
| N-N--0.415700  | 0  | -7.239812  | -4.167816 | -5.705934 | L |
| C-CT--0.025200 | -1 | -7.016082  | -5.433453 | -5.018265 | L |
| C-C-0.597300   | 0  | -7.948117  | -5.696593 | -3.846735 | L |
| O-O--0.567900  | 0  | -8.283397  | -6.848727 | -3.576926 | L |
| H-H-0.271900   | 0  | -6.524931  | -3.444974 | -5.636363 | L |
| H-H1-0.069800  | 0  | -5.992878  | -5.450310 | -4.644505 | L |
| H-H1-0.069800  | 0  | -7.132785  | -6.249513 | -5.731473 | L |
| N-N--0.415700  | 0  | -8.334763  | -4.640329 | -3.135496 | L |
| C-CT--0.038900 | -1 | -9.384107  | -4.696705 | -2.115562 | L |
| C-C-0.597300   | 0  | -10.755498 | -4.989092 | -2.715289 | L |
| O-O--0.567900  | 0  | -11.498251 | -5.824116 | -2.198553 | L |
| C-CT-0.365400  | 0  | -9.418486  | -3.392315 | -1.304575 | L |
| O-OH--0.676100 | 0  | -8.178964  | -3.222026 | -0.655517 | L |
| C-CT--0.243800 | 0  | -10.500579 | -3.400205 | -0.225358 | L |
| H-H-0.271900   | 0  | -7.942282  | -3.737037 | -3.379406 | L |
| H-H1-0.100700  | 0  | -9.155807  | -5.510305 | -1.427228 | L |
| H-H1-0.004300  | 0  | -9.588540  | -2.543635 | -1.967266 | L |
| H-HC-0.064200  | 0  | -11.482562 | -3.294188 | -0.685080 | L |
| H-HC-0.064200  | 0  | -10.342532 | -2.568013 | 0.460214  | L |
| H-HC-0.064200  | 0  | -10.465607 | -4.338358 | 0.326647  | L |
| H-HO-0.410200  | 0  | -7.592349  | -2.768225 | -1.294570 | L |
| N-N--0.4157    | 0  | -11.106494 | -4.282598 | -3.791100 | L |
| C-CT--0.1490   | -1 | -12.338961 | -4.476316 | -4.526921 | L |
| H-H-0.2719     | 0  | -10.440702 | -3.598609 | -4.140222 | L |
| H-H1-0.0976    | 0  | -12.416405 | -3.723233 | -5.312095 | L |
| H-H1-0.0976    | 0  | -13.190906 | -4.392744 | -3.850820 | L |
| H-H1-0.0976    | 0  | -12.335294 | -5.468754 | -4.980708 | L |
| N-N2--0.511415 | 0  | 1.999821   | -0.010339 | -1.634197 | H |
| C-CA-0.057801  | 0  | 0.836701   | 0.654112  | -1.573357 | H |
| C-CA-0.063496  | 0  | 0.259271   | 1.246339  | -2.698806 | H |

|                |   |           |           |           |   |
|----------------|---|-----------|-----------|-----------|---|
| C-CA--0.109122 | 0 | 0.942766  | 1.167904  | -3.915969 | H |
| C-CA--0.164490 | 0 | 2.159168  | 0.508186  | -3.968805 | H |
| C-CA-0.098392  | 0 | 2.646649  | -0.078441 | -2.807933 | H |
| C-C-0.541263   | 0 | -1.095190 | 1.886025  | -2.744997 | H |
| O-O--0.574884  | 0 | -1.655363 | 1.947078  | -3.834845 | H |
| H-H4-0.220889  | 0 | 0.366610  | 0.702587  | -0.594352 | H |
| H-HA-0.160434  | 0 | 0.496155  | 1.617695  | -4.793836 | H |
| H-HA-0.142191  | 0 | 2.724912  | 0.445432  | -4.889793 | H |
| H-H4-0.174502  | 0 | 3.574285  | -0.639220 | -2.801309 | H |
| H-H-0.353801   | 0 | -1.413473 | 2.073061  | -0.760589 | H |
| Zn-ZN-0.974537 | 0 | 2.854607  | -1.136707 | 0.034459  | H |
| O-OW--0.834000 | 0 | -2.130435 | -7.249891 | 3.494314  | L |
| H-HW-0.417000  | 0 | -2.567627 | -6.669346 | 2.851603  | L |
| H-HW-0.417000  | 0 | -2.854761 | -7.794894 | 3.843129  | L |
| O-OW--0.783903 | 0 | 1.315433  | -2.601686 | -0.121103 | H |
| H-HW-0.401253  | 0 | 0.948882  | -2.498552 | 0.793489  | H |
| H-HW-0.424111  | 0 | 1.924207  | -3.382277 | -0.176565 | H |
| O-OW--0.834000 | 0 | -3.693900 | -8.455165 | 7.232887  | L |
| H-HW-0.417000  | 0 | -3.750604 | -7.511029 | 7.400780  | L |
| H-HW-0.417000  | 0 | -3.814038 | -8.530614 | 6.274051  | L |
| O-OW--0.834000 | 0 | 7.162768  | -0.009489 | 1.787711  | L |
| H-HW-0.417000  | 0 | 6.859343  | 0.404991  | 2.615873  | L |
| H-HW-0.417000  | 0 | 6.371991  | 0.078065  | 1.231502  | L |
| O-OW--0.834000 | 0 | 7.053622  | -4.962412 | 4.772815  | L |
| H-HW-0.417000  | 0 | 6.102698  | -5.014210 | 5.000249  | L |
| H-HW-0.417000  | 0 | 7.253695  | -5.846488 | 4.463057  | L |
| O-OW--0.834000 | 0 | 8.634580  | -0.919635 | -0.256030 | L |
| H-HW-0.417000  | 0 | 8.159449  | -0.547219 | 0.514715  | L |
| H-HW-0.417000  | 0 | 8.841579  | -0.130118 | -0.776754 | L |
| O-OW--0.834000 | 0 | 12.643642 | -1.068486 | -2.001739 | L |
| H-HW-0.417000  | 0 | 11.788840 | -0.818318 | -2.392728 | L |
| H-HW-0.417000  | 0 | 12.648603 | -2.031583 | -2.112997 | L |
| O-OW--0.834000 | 0 | 8.287255  | -3.292341 | 0.978875  | L |
| H-HW-0.417000  | 0 | 8.499184  | -2.521284 | 0.412278  | L |
| H-HW-0.417000  | 0 | 7.554529  | -2.957938 | 1.506618  | L |
| O-OW--0.834000 | 0 | 4.362781  | -4.906888 | 5.169246  | L |
| H-HW-0.417000  | 0 | 4.095841  | -4.521460 | 6.026686  | L |
| H-HW-0.417000  | 0 | 4.054785  | -4.243133 | 4.541631  | L |
| S-SH--0.326142 | 0 | -2.375790 | -0.736484 | -1.666862 | H |
| O-OW--0.834000 | 0 | -1.638684 | 2.435323  | -1.672633 | H |

**TS5**

|                |    |            |          |          |   |
|----------------|----|------------|----------|----------|---|
| C-CT--0.366200 | -1 | -10.309951 | 3.920915 | 4.014481 | L |
| C-C-0.597200   | 0  | -8.979827  | 3.269528 | 3.770742 | L |
| O-O--0.567900  | 0  | -8.404572  | 2.698437 | 4.690405 | L |
| H-HC-0.112300  | 0  | -11.052743 | 3.459970 | 3.366426 | L |
| H-HC-0.112300  | 0  | -10.230279 | 4.982544 | 3.787033 | L |
| H-HC-0.112300  | 0  | -10.589093 | 3.783489 | 5.056679 | L |
| N-N--0.415700  | 0  | -8.517555  | 3.358780 | 2.530906 | L |
| C-CT--0.059700 | -1 | -7.343712  | 2.648442 | 2.016700 | L |
| C-C-0.597300   | 0  | -6.197799  | 3.631492 | 1.838846 | L |
| O-O--0.567900  | 0  | -6.362490  | 4.644334 | 1.164895 | L |
| C-CT-0.130300  | 0  | -7.693531  | 1.908272 | 0.701473 | L |
| C-CT--0.043000 | 0  | -8.895761  | 0.948954 | 0.898909 | L |

|                |    |            |           |           |           |
|----------------|----|------------|-----------|-----------|-----------|
| C-CT--0.320400 | 0  | -6.476722  | 1.114856  | 0.196792  | L         |
| C-CT--0.066000 | 0  | -9.411883  | 0.306467  | -0.393452 | L         |
| H-H-0.271900   | 0  | -9.051539  | 3.924315  | 1.879272  | L         |
| H-H1-0.086900  | 0  | -7.034384  | 1.897520  | 2.743584  | L         |
| H-HC-0.018700  | 0  | -7.960084  | 2.649770  | -0.053908 | L         |
| H-HC-0.023600  | 0  | -9.735708  | 1.496185  | 1.325037  | L         |
| H-HC-0.023600  | 0  | -8.620133  | 0.159940  | 1.599821  | L         |
| H-HC-0.088200  | 0  | -6.203221  | 0.333780  | 0.906313  | L         |
| H-HC-0.088200  | 0  | -5.621410  | 1.775606  | 0.050360  | L         |
| H-HC-0.088200  | 0  | -6.693025  | 0.671205  | -0.773058 | L         |
| H-HC-0.018600  | 0  | -9.629814  | 1.078440  | -1.130270 | L         |
| H-HC-0.018600  | 0  | -10.329067 | -0.241435 | -0.180347 | L         |
| H-HC-0.018600  | 0  | -8.675528  | -0.390156 | -0.791142 | L         |
| N-N--0.516300  | 0  | -5.077790  | 3.338272  | 2.495936  | L         |
| C-CT-0.038100  | -1 | -3.776896  | 3.982324  | 2.375400  | L H-HC 30 |
| C-C-0.536600   | 0  | -3.703797  | 5.509368  | 2.180213  | L         |
| O-O--0.581900  | 0  | -2.710827  | 6.046327  | 1.690615  | L         |
| C-CT--0.547145 | 0  | -3.027303  | 3.265739  | 1.227948  | H         |
| C-C-0.532653   | 0  | -2.377907  | 1.964722  | 1.605542  | H         |
| O-O2--0.588507 | 0  | -2.527579  | 1.413479  | 2.699350  | H         |
| O-O2--0.625559 | 0  | -1.602075  | 1.418167  | 0.681544  | H         |
| H-H-0.293600   | 0  | -5.051621  | 2.449304  | 2.976888  | L         |
| H-H1-0.088000  | 0  | -3.222978  | 3.790884  | 3.294838  | L         |
| H-HC-0.128435  | 0  | -2.204392  | 3.897021  | 0.861849  | H         |
| H-HC-0.183556  | 0  | -3.670952  | 3.155100  | 0.346847  | H         |
| N-N--0.415700  | 0  | -4.690154  | 6.260086  | 2.645949  | L         |
| C-CT--0.025200 | -1 | -4.652183  | 7.701171  | 2.493424  | L         |
| C-C-0.597300   | 0  | -3.758532  | 8.351223  | 3.536694  | L         |
| O-O--0.567900  | 0  | -4.237516  | 9.017178  | 4.456088  | L         |
| H-H-0.271900   | 0  | -5.535465  | 5.767119  | 2.888368  | L         |
| H-H1-0.069800  | 0  | -5.660323  | 8.096574  | 2.607379  | L         |
| H-H1-0.069800  | 0  | -4.293790  | 7.966436  | 1.497288  | L         |
| N-N--0.415700  | 0  | -2.454489  | 8.140728  | 3.392480  | L         |
| C-CT--0.038900 | -1 | -1.428043  | 8.565539  | 4.330290  | L         |
| C-C-0.597300   | 0  | -0.513492  | 9.639566  | 3.730028  | L         |
| O-O--0.567900  | 0  | -0.605163  | 9.998381  | 2.554911  | L         |
| C-CT-0.365400  | 0  | -0.591254  | 7.411699  | 4.926587  | L         |
| O-OH--0.676100 | 0  | 0.608006   | 7.237365  | 4.214327  | L         |
| C-CT--0.243800 | 0  | -1.306009  | 6.069757  | 5.041381  | L         |
| H-H-0.271900   | 0  | -2.191877  | 7.542606  | 2.611415  | L         |
| H-H1-0.100700  | 0  | -1.931279  | 9.034732  | 5.173746  | L         |
| H-H1-0.004300  | 0  | -0.311105  | 7.712904  | 5.936558  | L         |
| H-HC-0.064200  | 0  | -2.252390  | 6.200693  | 5.564026  | L         |
| H-HC-0.064200  | 0  | -0.678162  | 5.380231  | 5.600603  | L         |
| H-HC-0.064200  | 0  | -1.488426  | 5.650544  | 4.052672  | L         |
| H-HO-0.410200  | 0  | 1.094496   | 6.480656  | 4.607077  | L         |
| N-N--0.415700  | 0  | 0.399397   | 10.157811 | 4.555510  | L         |
| C-CT--0.025200 | -1 | 1.440132   | 11.091642 | 4.138946  | L         |
| C-C-0.597300   | 0  | 2.342559   | 10.600678 | 3.016013  | L         |
| O-O--0.567900  | 0  | 2.680813   | 11.376849 | 2.127375  | L         |
| H-H-0.271900   | 0  | 0.457458   | 9.760362  | 5.477753  | L         |
| H-H1-0.069800  | 0  | 2.074334   | 11.327587 | 4.992291  | L         |
| H-H1-0.069800  | 0  | 0.968024   | 12.014561 | 3.801532  | L         |
| N-N--0.516300  | 0  | 2.735886   | 9.330706  | 3.072512  | L         |

|                |    |           |           |           |   |
|----------------|----|-----------|-----------|-----------|---|
| C-CT-0.038100  | -1 | 3.644412  | 8.731374  | 2.096010  | L |
| C-C-0.536600   | 0  | 3.014130  | 8.439879  | 0.747426  | L |
| O-O--0.581900  | 0  | 3.746749  | 8.142056  | -0.189702 | L |
| C-CT--0.030300 | 0  | 4.228534  | 7.418482  | 2.648877  | L |
| C-C-0.799400   | -1 | 5.575538  | 7.620370  | 3.324851  | L |
| O-O2--0.801400 | -1 | 6.155993  | 8.724286  | 3.240691  | L |
| O-O2--0.801400 | -1 | 6.035647  | 6.668167  | 3.987293  | L |
| H-H-0.293600   | 0  | 2.359133  | 8.725038  | 3.787875  | L |
| H-H1-0.088000  | 0  | 4.447110  | 9.437593  | 1.881204  | L |
| H-HC--0.012200 | 0  | 4.384314  | 6.702340  | 1.840289  | L |
| H-HC--0.012200 | 0  | 3.525851  | 6.963145  | 3.349987  | L |
| N-N--0.415700  | 0  | 1.692323  | 8.527588  | 0.634143  | L |
| C-CT--0.002400 | -1 | 0.972659  | 8.316322  | -0.614681 | L |
| C-C-0.597300   | 0  | 0.373720  | 9.607068  | -1.175318 | L |
| O-O--0.567900  | 0  | 0.356949  | 9.814844  | -2.388644 | L |
| C-CT--0.034300 | 0  | -0.088470 | 7.223340  | -0.432743 | L |
| C-CA-0.011800  | 0  | 0.442373  | 5.905649  | 0.108834  | L |
| C-CA--0.125600 | 0  | 1.084081  | 4.980708  | -0.735114 | L |
| C-CA--0.125600 | 0  | 0.260357  | 5.587769  | 1.464669  | L |
| C-CA--0.170400 | 0  | 1.522020  | 3.746339  | -0.219193 | L |
| C-CA--0.170400 | 0  | 0.672479  | 4.347683  | 1.977164  | L |
| C-CA--0.107200 | 0  | 1.298033  | 3.422480  | 1.128796  | L |
| H-H-0.271900   | 0  | 1.172323  | 8.728262  | 1.475702  | L |
| H-H1-0.097800  | 0  | 1.662504  | 7.948909  | -1.373583 | L |
| H-HC-0.029500  | 0  | -0.554194 | 7.029530  | -1.399802 | L |
| H-HC-0.029500  | 0  | -0.868305 | 7.594247  | 0.234151  | L |
| H-HA-0.133000  | 0  | 1.203569  | 5.201183  | -1.784664 | L |
| H-HA-0.133000  | 0  | -0.254448 | 6.286495  | 2.098406  | L |
| H-HA-0.143000  | 0  | 1.986498  | 3.018262  | -0.863993 | L |
| H-HA-0.143000  | 0  | 0.467921  | 4.093496  | 3.005743  | L |
| H-HA-0.129700  | 0  | 1.570881  | 2.448726  | 1.501767  | L |
| N-N--0.415700  | 0  | -0.080873 | 10.504596 | -0.298070 | L |
| C-CT--0.149000 | -1 | -0.475166 | 11.850526 | -0.663171 | L |
| H-H-0.271900   | 0  | -0.074873 | 10.244682 | 0.683032  | L |
| H-H1-0.097600  | 0  | -0.863083 | 12.367606 | 0.214897  | L |
| H-H1-0.097600  | 0  | -1.246656 | 11.808951 | -1.433887 | L |
| H-H1-0.097600  | 0  | 0.390489  | 12.389818 | -1.050593 | L |
| C-CT--0.366200 | -1 | 7.983068  | 8.430931  | -0.185824 | L |
| C-C-0.597200   | 0  | 7.521318  | 7.629893  | -1.380801 | L |
| O-O--0.567900  | 0  | 8.342894  | 7.280017  | -2.224696 | L |
| H-HC-0.112300  | 0  | 7.530834  | 9.419742  | -0.216378 | L |
| H-HC-0.112300  | 0  | 9.067136  | 8.514230  | -0.206904 | L |
| H-HC-0.112300  | 0  | 7.679411  | 7.921335  | 0.729527  | L |
| N-N--0.415700  | 0  | 6.211709  | 7.381782  | -1.475688 | L |
| C-CT--0.051800 | -1 | 5.559479  | 6.850421  | -2.680441 | L |
| C-C-0.597300   | 0  | 4.919167  | 7.975826  | -3.493036 | L |
| O-O--0.567900  | 0  | 5.305606  | 8.244714  | -4.630904 | L |
| C-CT--0.110200 | 0  | 4.617310  | 5.673311  | -2.342010 | L |
| C-CT-0.353100  | 0  | 4.565772  | 4.619474  | -3.469213 | L |
| C-CT--0.412100 | 0  | 3.796791  | 3.378987  | -3.029007 | L |
| C-CT--0.412100 | 0  | 3.897335  | 5.115899  | -4.753768 | L |
| H-H-0.271900   | 0  | 5.606955  | 7.704555  | -0.727495 | L |
| H-H1-0.092200  | 0  | 6.346885  | 6.446462  | -3.317926 | L |
| H-HC-0.045700  | 0  | 3.613745  | 6.035748  | -2.117628 | L |

|                |    |           |           |           |   |
|----------------|----|-----------|-----------|-----------|---|
| H-HC-0.045700  | 0  | 4.996491  | 5.177658  | -1.448138 | L |
| H-HC--0.036100 | 0  | 5.584239  | 4.307060  | -3.704493 | L |
| H-HC-0.100000  | 0  | 2.735648  | 3.608474  | -2.937223 | L |
| H-HC-0.100000  | 0  | 4.171266  | 3.023554  | -2.070674 | L |
| H-HC-0.100000  | 0  | 3.926841  | 2.588561  | -3.765453 | L |
| H-HC-0.100000  | 0  | 2.917019  | 5.535532  | -4.524268 | L |
| H-HC-0.100000  | 0  | 3.777257  | 4.289968  | -5.453881 | L |
| H-HC-0.100000  | 0  | 4.515306  | 5.874794  | -5.228663 | L |
| N-N--0.415700  | 0  | 3.971229  | 8.658868  | -2.865396 | L |
| C-CT--0.149000 | -1 | 3.352364  | 9.879891  | -3.312443 | L |
| H-H-0.271900   | 0  | 3.770829  | 8.344789  | -1.923018 | L |
| H-H1-0.097600  | 0  | 4.065747  | 10.474300 | -3.884699 | L |
| H-H1-0.097600  | 0  | 3.011006  | 10.454923 | -2.450420 | L |
| H-H1-0.097600  | 0  | 2.493433  | 9.643754  | -3.942845 | L |
| C-CT--0.366200 | -1 | -8.721471 | 2.384235  | 8.124356  | L |
| C-C-0.597200   | 0  | -7.843359 | 1.178030  | 7.947823  | L |
| O-O--0.567900  | 0  | -7.517213 | 0.502882  | 8.917577  | L |
| H-HC-0.112300  | 0  | -9.641646 | 2.236291  | 7.562439  | L |
| H-HC-0.112300  | 0  | -8.197639 | 3.261654  | 7.748068  | L |
| H-HC-0.112300  | 0  | -8.945621 | 2.510429  | 9.181419  | L |
| N-N--0.415700  | 0  | -7.455996 | 0.922103  | 6.706379  | L |
| C-CT--0.038900 | -1 | -6.661219 | -0.236988 | 6.296034  | L |
| C-C-0.597300   | 0  | -5.388648 | 0.233503  | 5.614524  | L |
| O-O--0.567900  | 0  | -5.410729 | 0.627245  | 4.448659  | L |
| C-CT-0.365400  | 0  | -7.473682 | -1.201792 | 5.418476  | L |
| O-OH--0.676100 | 0  | -8.028636 | -0.538138 | 4.308842  | L |
| C-CT--0.243800 | 0  | -8.624032 | -1.818424 | 6.219764  | L |
| H-H-0.271900   | 0  | -7.790633 | 1.538338  | 5.969271  | L |
| H-H1-0.100700  | 0  | -6.365240 | -0.800177 | 7.180766  | L |
| H-H1-0.004300  | 0  | -6.818754 | -2.000165 | 5.067244  | L |
| H-HC-0.064200  | 0  | -8.226992 | -2.352092 | 7.082896  | L |
| H-HC-0.064200  | 0  | -9.181210 | -2.514890 | 5.599148  | L |
| H-HC-0.064200  | 0  | -9.307656 | -1.039960 | 6.556850  | L |
| H-HO-0.410200  | 0  | -7.331519 | 0.031517  | 3.953129  | L |
| N-N--0.415700  | 0  | -4.305586 | 0.249630  | 6.395496  | L |
| C-CT--0.059700 | -1 | -3.107954 | 1.057613  | 6.155887  | L |
| C-C-0.597300   | 0  | -1.863866 | 0.178527  | 6.071676  | L |
| O-O--0.567900  | 0  | -1.601227 | -0.620376 | 6.975429  | L |
| C-CT-0.130300  | 0  | -2.971857 | 2.153432  | 7.238151  | L |
| C-CT--0.043000 | 0  | -4.229406 | 3.044578  | 7.396342  | L |
| C-CT--0.320400 | 0  | -1.740331 | 3.028467  | 6.962603  | L |
| C-CT--0.066000 | 0  | -4.681688 | 3.799933  | 6.137372  | L |
| H-H-0.271900   | 0  | -4.385244 | -0.154568 | 7.314442  | L |
| H-H1-0.086900  | 0  | -3.214148 | 1.558828  | 5.192145  | L |
| H-HC-0.018700  | 0  | -2.811267 | 1.659764  | 8.198452  | L |
| H-HC-0.023600  | 0  | -4.036661 | 3.778314  | 8.179809  | L |
| H-HC-0.023600  | 0  | -5.060038 | 2.430014  | 7.742796  | L |
| H-HC-0.088200  | 0  | -1.755499 | 3.369850  | 5.927303  | L |
| H-HC-0.088200  | 0  | -0.832865 | 2.445323  | 7.119729  | L |
| H-HC-0.088200  | 0  | -1.720840 | 3.884994  | 7.635192  | L |
| H-HC-0.018600  | 0  | -3.888817 | 4.453872  | 5.778358  | L |
| H-HC-0.018600  | 0  | -5.555039 | 4.406904  | 6.376303  | L |
| H-HC-0.018600  | 0  | -4.954846 | 3.100238  | 5.350534  | L |
| N-N--0.516300  | 0  | -1.121214 | 0.347229  | 4.978998  | L |



|                |    |           |            |           |           |
|----------------|----|-----------|------------|-----------|-----------|
| C-CT-0.038100  | -1 | 0.186972  | -0.231541  | 4.720715  | L H-HC 17 |
| C-C-0.536600   | 0  | 1.111186  | -0.074767  | 5.934426  | L         |
| O-O--0.581900  | 0  | 1.312361  | 1.016772   | 6.460522  | L         |
| C-CT--0.520019 | 0  | 0.716746  | 0.414418   | 3.428570  | H         |
| C-C-0.636404   | 0  | 0.962004  | -0.538280  | 2.269564  | H         |
| O-O2--0.608036 | 0  | 0.333517  | -1.638060  | 2.181665  | H         |
| O-O2--0.608131 | 0  | 1.808314  | -0.109335  | 1.425263  | H         |
| H-H-0.293600   | 0  | -1.505568 | 0.937839   | 4.246530  | L         |
| H-H1-0.088000  | 0  | 0.043107  | -1.300647  | 4.558430  | L         |
| H-HC-0.132300  | 0  | 1.661984  | 0.918021   | 3.643140  | H         |
| H-HC-0.188993  | 0  | 0.027884  | 1.188300   | 3.075883  | H         |
| N-N--0.415700  | 0  | 1.665028  | -1.184160  | 6.391673  | L         |
| C-CT-0.033700  | -1 | 2.572815  | -1.229408  | 7.514911  | L         |
| C-C-0.597300   | 0  | 3.792407  | -2.050238  | 7.111631  | L         |
| O-O--0.567900  | 0  | 3.841826  | -3.275586  | 7.267352  | L         |
| C-CT--0.182500 | 0  | 1.824293  | -1.785997  | 8.734301  | L         |
| H-H-0.271900   | 0  | 1.369656  | -2.062364  | 5.979858  | L         |
| H-H1-0.082300  | 0  | 2.918440  | -0.223650  | 7.761718  | L         |
| H-HC-0.060300  | 0  | 0.985398  | -1.131440  | 8.974094  | L         |
| H-HC-0.060300  | 0  | 2.500427  | -1.834401  | 9.587563  | L         |
| H-HC-0.060300  | 0  | 1.447035  | -2.786061  | 8.514632  | L         |
| N-N--0.415700  | 0  | 4.762583  | -1.355823  | 6.529425  | L         |
| C-CT-0.018800  | -1 | 5.967376  | -1.940046  | 5.984914  | L H-HC 20 |
| C-C-0.597300   | 0  | 7.165411  | -1.789328  | 6.931583  | L         |
| O-O--0.567900  | 0  | 7.212460  | -0.939337  | 7.823290  | L         |
| C-CT--0.517456 | 0  | 6.219073  | -1.311261  | 4.612389  | H         |
| C-CM-0.287351  | 0  | 5.341002  | -1.790657  | 3.515394  | H         |
| N-N2--0.586994 | 0  | 5.479224  | -3.045461  | 2.938386  | H         |
| C-CM--0.020338 | 0  | 4.356463  | -1.183159  | 2.787176  | H         |
| C-CM-0.242458  | 0  | 4.605352  | -3.135793  | 1.900621  | H         |
| N-N2--0.505070 | 0  | 3.914800  | -2.017118  | 1.780140  | H         |
| H-H-0.271900   | 0  | 4.658027  | -0.346716  | 6.468020  | L         |
| H-H1-0.088100  | 0  | 5.820607  | -3.006939  | 5.849119  | L         |
| H-HC-0.166355  | 0  | 7.271862  | -1.483999  | 4.344782  | H         |
| H-HC-0.174481  | 0  | 6.112964  | -0.231482  | 4.742984  | H         |
| H-H-0.335795   | 0  | 6.132430  | -3.760339  | 3.251098  | H         |
| H-H4-0.152777  | 0  | 3.959853  | -0.186956  | 2.911353  | H         |
| H-H5-0.209475  | 0  | 4.502866  | -4.002321  | 1.262180  | H         |
| N-N--0.415700  | 0  | 8.170117  | -2.627972  | 6.685071  | L         |
| C-CT--0.149000 | -1 | 9.439225  | -2.557862  | 7.375954  | L         |
| H-H-0.271900   | 0  | 8.017809  | -3.306870  | 5.945788  | L         |
| H-H1-0.097600  | 0  | 10.111951 | -3.327360  | 6.996140  | L         |
| H-H1-0.097600  | 0  | 9.281346  | -2.706149  | 8.445590  | L         |
| H-H1-0.097600  | 0  | 9.886431  | -1.574613  | 7.218853  | L         |
| C-CT--0.366200 | -1 | 8.357870  | -9.388373  | 0.928827  | L         |
| C-C-0.597200   | 0  | 8.735846  | -9.164159  | -0.522947 | L         |
| O-O--0.567900  | 0  | 9.770493  | -8.562616  | -0.784299 | L         |
| H-HC-0.112300  | 0  | 8.277427  | -10.453968 | 1.130083  | L         |
| H-HC-0.112300  | 0  | 7.418645  | -8.881615  | 1.143108  | L         |
| H-HC-0.112300  | 0  | 9.136716  | -8.957816  | 1.558086  | L         |
| N-N--0.254800  | 0  | 7.915593  | -9.622426  | -1.485183 | L         |
| C-CT--0.026600 | -1 | 8.156446  | -9.387001  | -2.911057 | L         |
| C-C-0.589600   | 0  | 8.009600  | -7.914290  | -3.294107 | L         |
| O-O--0.574800  | 0  | 8.722801  | -7.419489  | -4.163855 | L         |

|                |    |           |            |           |           |
|----------------|----|-----------|------------|-----------|-----------|
| C-CT--0.007000 | 0  | 7.146100  | -10.278834 | -3.640446 | L         |
| C-CT-0.018900  | 0  | 5.987549  | -10.400427 | -2.649236 | L         |
| C-CT-0.019200  | 0  | 6.682158  | -10.372053 | -1.286920 | L         |
| H-H1-0.064100  | 0  | 9.167734  | -9.700328  | -3.173441 | L         |
| H-HC-0.025300  | 0  | 7.587243  | -11.263434 | -3.802697 | L         |
| H-HC-0.025300  | 0  | 6.824483  | -9.848685  | -4.590250 | L         |
| H-HC-0.021300  | 0  | 5.424618  | -11.322712 | -2.795752 | L         |
| H-HC-0.021300  | 0  | 5.330473  | -9.534429  | -2.743548 | L         |
| H-H1-0.039100  | 0  | 6.036601  | -9.895369  | -0.547876 | L         |
| H-H1-0.039100  | 0  | 6.924382  | -11.388969 | -0.975343 | L         |
| N-N--0.516300  | 0  | 7.086265  | -7.216931  | -2.631581 | L         |
| C-CT-0.039700  | -1 | 6.832276  | -5.790681  | -2.805478 | L         |
| C-C-0.536600   | 0  | 8.091184  | -4.924591  | -2.678710 | L         |
| O-O--0.581900  | 0  | 8.265683  | -3.943238  | -3.404690 | L         |
| C-CT-0.056000  | 0  | 5.734078  | -5.354118  | -1.830618 | L H-HC 24 |
| C-CT--0.515956 | 0  | 5.200520  | -3.970007  | -2.209997 | H         |
| C-C-0.587828   | 0  | 4.112040  | -3.433901  | -1.289629 | H         |
| O-O2--0.600319 | 0  | 4.065967  | -2.152299  | -1.240837 | H         |
| O-O2--0.589127 | 0  | 3.348265  | -4.221356  | -0.685078 | H         |
| H-H-0.293600   | 0  | 6.551318  | -7.692912  | -1.924435 | L         |
| H-H1-0.110500  | 0  | 6.455489  | -5.639108  | -3.817398 | L         |
| H-HC--0.017300 | 0  | 6.129902  | -5.332977  | -0.814058 | L         |
| H-HC--0.017300 | 0  | 4.912432  | -6.070883  | -1.876331 | L         |
| H-HC-0.167759  | 0  | 4.791215  | -4.022630  | -3.226068 | H         |
| H-HC-0.135230  | 0  | 6.021958  | -3.245804  | -2.227538 | H         |
| N-N--0.415700  | 0  | 9.001565  | -5.328197  | -1.795044 | L         |
| C-CT--0.024900 | -1 | 10.241686 | -4.628163  | -1.481390 | L         |
| C-C-0.597300   | 0  | 11.263249 | -4.520696  | -2.606705 | L         |
| O-O--0.567900  | 0  | 12.245564 | -3.790540  | -2.473912 | L         |
| C-CT-0.211700  | 0  | 10.881959 | -5.263172  | -0.240825 | L         |
| O-OH--0.654600 | 0  | 9.925543  | -5.452280  | 0.791701  | L         |
| H-H-0.271900   | 0  | 8.790713  | -6.134852  | -1.224035 | L         |
| H-H1-0.084300  | 0  | 9.976413  | -3.603427  | -1.216629 | L         |
| H-H1-0.035200  | 0  | 11.681289 | -4.615119  | 0.121587  | L         |
| H-H1-0.035200  | 0  | 11.307872 | -6.231546  | -0.507736 | L         |
| H-HO-0.427500  | 0  | 9.376997  | -4.640101  | 0.872885  | L         |
| N-N--0.415700  | 0  | 11.021919 | -5.205138  | -3.722967 | L         |
| C-CT-0.033700  | -1 | 11.771676 | -5.043563  | -4.961951 | L         |
| C-C-0.597300   | 0  | 10.939370 | -4.487631  | -6.122043 | L         |
| O-O--0.567900  | 0  | 11.372815 | -4.500081  | -7.273399 | L         |
| C-CT--0.182500 | 0  | 12.397854 | -6.405562  | -5.295226 | L         |
| H-H-0.271900   | 0  | 10.206491 | -5.807519  | -3.730095 | L         |
| H-H1-0.082300  | 0  | 12.587681 | -4.336041  | -4.808643 | L         |
| H-HC-0.060300  | 0  | 13.014088 | -6.743027  | -4.461154 | L         |
| H-HC-0.060300  | 0  | 13.024054 | -6.315506  | -6.183493 | L         |
| H-HC-0.060300  | 0  | 11.611300 | -7.137893  | -5.484267 | L         |
| N-N--0.415700  | 0  | 9.759477  | -3.970313  | -5.797461 | L         |
| C-CT--0.025200 | -1 | 8.855701  | -3.289557  | -6.701832 | L         |
| C-C-0.597300   | 0  | 8.807161  | -1.785276  | -6.484028 | L         |
| O-O--0.567900  | 0  | 8.825913  | -1.014015  | -7.440450 | L         |
| H-H-0.271900   | 0  | 9.480513  | -4.026294  | -4.824125 | L         |
| H-H1-0.069800  | 0  | 7.849191  | -3.681222  | -6.557876 | L         |
| H-H1-0.069800  | 0  | 9.145543  | -3.474188  | -7.736705 | L         |
| N-N--0.415700  | 0  | 8.744664  | -1.377702  | -5.219619 | L         |

|                |    |           |           |           |           |
|----------------|----|-----------|-----------|-----------|-----------|
| C-CT--0.002400 | -1 | 8.575198  | 0.008246  | -4.800359 | L         |
| C-C-0.597300   | 0  | 9.695190  | 0.443114  | -3.847959 | L         |
| O-O--0.567900  | 0  | 10.323840 | -0.407890 | -3.209780 | L         |
| C-CT--0.034300 | 0  | 7.192364  | 0.131345  | -4.134464 | L         |
| C-CA-0.011800  | 0  | 6.038487  | -0.118161 | -5.088050 | L         |
| C-CA--0.125600 | 0  | 5.616332  | 0.899266  | -5.964992 | L         |
| C-CA--0.125600 | 0  | 5.413196  | -1.378703 | -5.130905 | L         |
| C-CA--0.170400 | 0  | 4.586137  | 0.652566  | -6.890561 | L         |
| C-CA--0.170400 | 0  | 4.378879  | -1.623050 | -6.051673 | L         |
| C-CA--0.107200 | 0  | 3.971089  | -0.611218 | -6.938408 | L         |
| H-H-0.271900   | 0  | 8.745842  | -2.084169 | -4.493354 | L         |
| H-H1-0.097800  | 0  | 8.599605  | 0.658126  | -5.675280 | L         |
| H-HC-0.029500  | 0  | 7.072942  | 1.125824  | -3.705437 | L         |
| H-HC-0.029500  | 0  | 7.137799  | -0.579952 | -3.308684 | L         |
| H-HA-0.133000  | 0  | 6.087948  | 1.870817  | -5.935703 | L         |
| H-HA-0.133000  | 0  | 5.734073  | -2.164104 | -4.462464 | L         |
| H-HA-0.143000  | 0  | 4.263543  | 1.436162  | -7.561425 | L         |
| H-HA-0.143000  | 0  | 3.894472  | -2.588262 | -6.076786 | L         |
| H-HA-0.129700  | 0  | 3.171605  | -0.799253 | -7.641604 | L         |
| N-N--0.254800  | 0  | 9.950532  | 1.756760  | -3.703888 | L         |
| C-CT--0.026600 | -1 | 10.814521 | 2.251927  | -2.638600 | L         |
| C-C-0.589600   | 0  | 10.180601 | 2.006656  | -1.260759 | L         |
| O-O--0.574800  | 0  | 8.986892  | 1.699258  | -1.181214 | L         |
| C-CT--0.007000 | 0  | 10.974442 | 3.751032  | -2.924206 | L         |
| C-CT-0.018900  | 0  | 9.655986  | 4.119721  | -3.602245 | L         |
| C-CT-0.019200  | 0  | 9.343282  | 2.870828  | -4.426367 | L         |
| H-H1-0.064100  | 0  | 11.783795 | 1.757472  | -2.693684 | L         |
| H-HC-0.025300  | 0  | 11.797673 | 3.902454  | -3.623870 | L         |
| H-HC-0.025300  | 0  | 11.134992 | 4.336898  | -2.017837 | L         |
| H-HC-0.021300  | 0  | 9.752988  | 5.007344  | -4.228172 | L         |
| H-HC-0.021300  | 0  | 8.881263  | 4.266903  | -2.847038 | L         |
| H-H1-0.039100  | 0  | 8.264576  | 2.762052  | -4.529425 | L         |
| H-H1-0.039100  | 0  | 9.805237  | 2.955261  | -5.410824 | L         |
| N-N--0.254800  | 0  | 10.946687 | 2.124497  | -0.165856 | L         |
| C-CT--0.026600 | -1 | 10.394538 | 2.113367  | 1.181788  | L         |
| C-C-0.589600   | 0  | 9.344679  | 3.199290  | 1.417867  | L         |
| O-O--0.574800  | 0  | 9.610105  | 4.379517  | 1.201832  | L         |
| C-CT--0.007000 | 0  | 11.595408 | 2.294590  | 2.121177  | L         |
| C-CT-0.018900  | 0  | 12.780980 | 1.807076  | 1.292016  | L         |
| C-CT-0.019200  | 0  | 12.396647 | 2.226020  | -0.124062 | L         |
| H-H1-0.064100  | 0  | 9.952172  | 1.132564  | 1.362124  | L         |
| H-HC-0.025300  | 0  | 11.478450 | 1.714202  | 3.036919  | L         |
| H-HC-0.025300  | 0  | 11.740002 | 3.350073  | 2.359006  | L         |
| H-HC-0.021300  | 0  | 12.844104 | 0.718870  | 1.345728  | L         |
| H-HC-0.021300  | 0  | 13.717427 | 2.265542  | 1.610662  | L         |
| H-H1-0.039100  | 0  | 12.694506 | 3.260464  | -0.300549 | L         |
| H-H1-0.039100  | 0  | 12.872139 | 1.560509  | -0.845353 | L         |
| N-N--0.415700  | 0  | 8.174435  | 2.775198  | 1.885073  | L         |
| C-CT-0.018800  | -1 | 7.018115  | 3.604717  | 2.178920  | L H-HC 33 |
| C-C-0.597300   | 0  | 6.152526  | 3.012527  | 3.289023  | L         |
| O-O--0.567900  | 0  | 6.177581  | 1.804608  | 3.524324  | L         |
| C-CT--0.515368 | 0  | 6.202300  | 3.723782  | 0.863812  | H         |
| C-CM-0.287903  | 0  | 5.607928  | 2.444563  | 0.353795  | H         |
| N-N2--0.582625 | 0  | 6.219491  | 1.664504  | -0.614401 | H         |

|                |    |           |           |           |           |
|----------------|----|-----------|-----------|-----------|-----------|
| C-CM--0.036893 | 0  | 4.500270  | 1.713407  | 0.714729  | H         |
| C-CM-0.243454  | 0  | 5.493027  | 0.530941  | -0.791527 | H         |
| N-N2--0.523998 | 0  | 4.445873  | 0.525685  | 0.012637  | H         |
| H-H-0.271900   | 0  | 8.033103  | 1.778226  | 1.962184  | L         |
| H-H1-0.088100  | 0  | 7.351829  | 4.599182  | 2.490365  | L         |
| H-HC-0.162301  | 0  | 6.861788  | 4.175975  | 0.108735  | H         |
| H-HC-0.188340  | 0  | 5.408977  | 4.460795  | 1.040151  | H         |
| H-H-0.339448   | 0  | 7.123233  | 1.871091  | -1.039689 | H         |
| H-H4-0.185957  | 0  | 3.746151  | 1.965849  | 1.444409  | H         |
| H-H5-0.211295  | 0  | 5.755957  | -0.255588 | -1.483506 | H         |
| N-N--0.415700  | 0  | 5.371721  | 3.873560  | 3.929331  | L         |
| C-CT-0.014300  | -1 | 4.555547  | 3.596648  | 5.102377  | L         |
| C-C-0.597300   | 0  | 5.209283  | 2.646871  | 6.116243  | L         |
| O-O--0.567900  | 0  | 4.683874  | 1.596721  | 6.490599  | L         |
| C-CT--0.204100 | 0  | 3.084462  | 3.358296  | 4.739337  | L         |
| C-C-0.713000   | 0  | 2.205584  | 4.197516  | 5.650257  | L         |
| N-N--0.919100  | 0  | 1.723636  | 3.671705  | 6.742095  | L         |
| O-O--0.593100  | 0  | 1.981193  | 5.374752  | 5.430570  | L         |
| H-H-0.271900   | 0  | 5.502112  | 4.859699  | 3.696996  | L         |
| H-H1-0.104800  | 0  | 4.560396  | 4.556356  | 5.624629  | L         |
| H-HC-0.079700  | 0  | 2.842323  | 2.305251  | 4.835719  | L         |
| H-HC-0.079700  | 0  | 2.894705  | 3.672619  | 3.713897  | L         |
| H-H-0.419600   | 0  | 1.094450  | 4.233059  | 7.274082  | L         |
| H-H-0.419600   | 0  | 1.769846  | 2.656359  | 6.826526  | L         |
| N-N--0.415700  | 0  | 6.397631  | 3.078003  | 6.552334  | L         |
| C-CT--0.149000 | -1 | 7.301901  | 2.340471  | 7.413178  | L         |
| H-H-0.271900   | 0  | 6.709817  | 3.949850  | 6.147425  | L         |
| H-H1-0.097600  | 0  | 8.054024  | 3.008132  | 7.832946  | L         |
| H-H1-0.097600  | 0  | 7.792077  | 1.553207  | 6.837247  | L         |
| H-H1-0.097600  | 0  | 6.741082  | 1.867421  | 8.222376  | L         |
| C-CT--0.366200 | -1 | -2.244495 | -2.725469 | 9.540677  | L         |
| C-C-0.597200   | 0  | -2.368274 | -3.819757 | 8.516120  | L         |
| O-O--0.567900  | 0  | -2.899334 | -4.885719 | 8.816019  | L         |
| H-HC-0.112300  | 0  | -1.190445 | -2.508717 | 9.703198  | L         |
| H-HC-0.112300  | 0  | -2.703781 | -3.053951 | 10.470549 | L         |
| H-HC-0.112300  | 0  | -2.749205 | -1.833956 | 9.173020  | L         |
| N-N--0.347900  | 0  | -1.849334 | -3.559333 | 7.319401  | L         |
| C-CT--0.240000 | -1 | -1.740671 | -4.530886 | 6.224752  | L         |
| C-C-0.734100   | 0  | -0.327870 | -4.571440 | 5.654426  | L         |
| O-O--0.589400  | 0  | 0.491791  | -3.696354 | 5.917581  | L         |
| C-CT--0.009400 | 0  | -2.823504 | -4.246078 | 5.164158  | L         |
| C-CT-0.018700  | 0  | -2.592160 | -2.961426 | 4.358564  | L H-HC 37 |
| C-CT--0.464524 | 0  | -3.669686 | -2.789520 | 3.282263  | H         |
| C-CT--0.195159 | 0  | -3.593816 | -1.459721 | 2.545150  | H         |
| N-N3--0.748751 | 0  | -2.362729 | -1.315421 | 1.695421  | H         |
| H-H-0.274700   | 0  | -1.462338 | -2.628732 | 7.176349  | L         |
| H-H1-0.142600  | 0  | -1.933321 | -5.524730 | 6.629279  | L         |
| H-HC-0.036200  | 0  | -3.794221 | -4.185240 | 5.659232  | L         |
| H-HC-0.036200  | 0  | -2.868520 | -5.077067 | 4.467595  | L         |
| H-HC-0.010300  | 0  | -1.612640 | -2.991302 | 3.881162  | L         |
| H-HC-0.010300  | 0  | -2.639377 | -2.113106 | 5.033702  | L         |
| H-HC-0.173903  | 0  | -4.649329 | -2.836021 | 3.766493  | H         |
| H-HC-0.148535  | 0  | -3.616864 | -3.630193 | 2.577839  | H         |
| H-HP-0.236066  | 0  | -3.617648 | -0.601086 | 3.214715  | H         |

|                |    |           |           |           |   |
|----------------|----|-----------|-----------|-----------|---|
| H-HP-0.172509  | 0  | -4.439195 | -1.369000 | 1.853029  | H |
| H-H-0.437293   | 0  | -2.207470 | -0.318958 | 1.462533  | H |
| H-H-0.366736   | 0  | -2.494197 | -1.803116 | 0.794377  | H |
| H-H-0.419451   | 0  | -1.455606 | -1.616875 | 2.123901  | H |
| N-N--0.415700  | 0  | -0.033259 | -5.604060 | 4.877443  | L |
| C-CT--0.025200 | -1 | 1.279322  | -5.802388 | 4.271957  | L |
| C-C-0.597300   | 0  | 1.151443  | -6.519267 | 2.927300  | L |
| O-O--0.567900  | 0  | 1.741426  | -7.572664 | 2.695471  | L |
| H-H-0.271900   | 0  | -0.777602 | -6.256204 | 4.648558  | L |
| H-H1-0.069800  | 0  | 1.902721  | -6.403041 | 4.934347  | L |
| H-H1-0.069800  | 0  | 1.770057  | -4.843505 | 4.101311  | L |
| N-N--0.415700  | 0  | 0.328980  | -5.937882 | 2.058129  | L |
| C-CT--0.025200 | -1 | -0.233344 | -6.541874 | 0.853700  | L |
| C-C-0.597300   | 0  | -1.385576 | -5.681578 | 0.402616  | L |
| O-O--0.567900  | 0  | -2.290806 | -5.459463 | 1.198187  | L |
| H-H-0.271900   | 0  | -0.114706 | -5.088766 | 2.382088  | L |
| H-H1-0.069800  | 0  | -0.600628 | -7.542695 | 1.080611  | L |
| H-H1-0.069800  | 0  | 0.531965  | -6.595074 | 0.078837  | L |
| N-N--0.415700  | 0  | -1.331493 | -5.202668 | -0.840824 | L |
| C-CT--0.001400 | -1 | -2.160958 | -4.113854 | -1.363104 | L |
| C-C-0.597300   | 0  | -3.625863 | -4.185380 | -0.909669 | L |
| O-O--0.567900  | 0  | -4.186518 | -3.229571 | -0.382851 | L |
| C-CT--0.015200 | 0  | -2.057975 | -4.090658 | -2.903003 | L |
| C-CA--0.001100 | 0  | -0.667825 | -4.304790 | -3.477834 | L |
| C-CA--0.190600 | 0  | 0.352977  | -3.363677 | -3.242802 | L |
| C-CA--0.190600 | 0  | -0.399700 | -5.451054 | -4.253359 | L |
| C-CA--0.234100 | 0  | 1.639502  | -3.570539 | -3.776984 | L |
| C-CA--0.234100 | 0  | 0.884321  | -5.659371 | -4.791695 | L |
| C-C-0.322600   | 0  | 1.907912  | -4.716354 | -4.552906 | L |
| O-OH--0.557900 | 0  | 3.142383  | -4.916174 | -5.086781 | L |
| H-H-0.271900   | 0  | -0.494961 | -5.390254 | -1.375095 | L |
| H-H1-0.087600  | 0  | -1.734424 | -3.195029 | -0.970876 | L |
| H-HC-0.029500  | 0  | -2.428195 | -3.136648 | -3.271166 | L |
| H-HC-0.029500  | 0  | -2.717933 | -4.857012 | -3.310031 | L |
| H-HA-0.169900  | 0  | 0.154234  | -2.472323 | -2.656321 | L |
| H-HA-0.169900  | 0  | -1.188455 | -6.161370 | -4.453142 | L |
| H-HA-0.165600  | 0  | 2.421475  | -2.849821 | -3.593662 | L |
| H-HA-0.165600  | 0  | 1.080701  | -6.530434 | -5.394755 | L |
| H-HO-0.399200  | 0  | 3.150292  | -5.692353 | -5.644023 | L |
| N-N--0.415700  | 0  | -4.228464 | -5.363987 | -1.082056 | L |
| C-CT--0.024900 | -1 | -5.560883 | -5.654507 | -0.573462 | L |
| C-C-0.597300   | 0  | -5.688826 | -5.579659 | 0.946394  | L |
| O-O--0.567900  | 0  | -5.075410 | -6.355954 | 1.688505  | L |
| C-CT-0.211700  | 0  | -6.028732 | -7.045867 | -1.003382 | L |
| O-OH--0.654600 | -1 | -7.281016 | -7.354361 | -0.405313 | L |
| H-H-0.271900   | 0  | -3.658938 | -6.098452 | -1.461363 | L |
| H-H1-0.084300  | 0  | -6.248247 | -4.930048 | -1.010514 | L |
| H-H1-0.035200  | 0  | -5.292863 | -7.785628 | -0.686007 | L |
| H-H1-0.035200  | 0  | -6.117665 | -7.079323 | -2.089269 | L |
| H-HO-0.427500  | -1 | -7.538794 | -8.227689 | -0.710508 | L |
| N-N--0.415700  | 0  | -6.654845 | -4.769882 | 1.373711  | L |
| C-CT-0.033700  | -1 | -7.155791 | -4.670810 | 2.733513  | L |
| C-C-0.597300   | 0  | -7.529433 | -5.990453 | 3.413595  | L |
| O-O--0.567900  | 0  | -7.507860 | -6.077362 | 4.639784  | L |

|                |    |            |            |           |           |
|----------------|----|------------|------------|-----------|-----------|
| C-CT--0.182500 | 0  | -8.334323  | -3.696720  | 2.730952  | L         |
| H-H-0.271900   | 0  | -7.098457  | -4.177333  | 0.678321  | L         |
| H-H1-0.082300  | 0  | -6.366199  | -4.230811  | 3.341389  | L         |
| H-HC-0.060300  | 0  | -8.032271  | -2.737382  | 2.306558  | L         |
| H-HC-0.060300  | 0  | -8.676038  | -3.543039  | 3.749952  | L         |
| H-HC-0.060300  | 0  | -9.154180  | -4.112789  | 2.151478  | L         |
| N-N--0.415700  | 0  | -7.886613  | -7.009578  | 2.631694  | L         |
| C-CT--0.025200 | -1 | -8.280719  | -8.315251  | 3.145686  | L         |
| C-C-0.597300   | 0  | -7.312023  | -9.451615  | 2.849455  | L         |
| O-O--0.567900  | 0  | -7.709087  | -10.614642 | 2.887296  | L         |
| H-H-0.271900   | 0  | -7.840362  | -6.854480  | 1.630826  | L         |
| H-H1-0.069800  | 0  | -9.241923  | -8.579845  | 2.706303  | L         |
| H-H1-0.069800  | 0  | -8.419349  | -8.275572  | 4.226339  | L         |
| N-N--0.415700  | 0  | -6.043442  | -9.139293  | 2.590362  | L         |
| C-CT--0.024900 | -1 | -4.964755  | -10.125258 | 2.624980  | L         |
| C-C-0.597300   | 0  | -4.276927  | -10.082585 | 3.983689  | L         |
| O-O--0.567900  | 0  | -3.966584  | -9.005485  | 4.501855  | L         |
| C-CT-0.211700  | 0  | -3.961155  | -9.828512  | 1.505283  | L         |
| O-OH--0.654600 | -1 | -3.087105  | -10.928920 | 1.307566  | L         |
| H-H-0.271900   | 0  | -5.796550  | -8.153375  | 2.579493  | L         |
| H-H1-0.084300  | 0  | -5.369463  | -11.123198 | 2.455931  | L         |
| H-H1-0.035200  | 0  | -3.388530  | -8.930988  | 1.744877  | L         |
| H-H1-0.035200  | 0  | -4.510344  | -9.653835  | 0.579245  | L         |
| H-HO-0.427500  | -1 | -2.547170  | -10.742393 | 0.535990  | L         |
| N-N--0.415700  | 0  | -4.069200  | -11.259060 | 4.574001  | L         |
| C-CT--0.149000 | -1 | -3.525618  | -11.403375 | 5.913126  | L         |
| H-H-0.271900   | 0  | -4.342742  | -12.079142 | 4.056593  | L         |
| H-H1-0.097600  | 0  | -3.302657  | -12.449781 | 6.121220  | L         |
| H-H1-0.097600  | 0  | -4.245326  | -11.034463 | 6.647230  | L         |
| H-H1-0.097600  | 0  | -2.608781  | -10.816505 | 6.007922  | L         |
| C-CT--0.366200 | -1 | -12.142925 | 5.076131   | -0.660020 | L         |
| C-C-0.597200   | 0  | -10.713639 | 5.260173   | -0.222269 | L         |
| O-O--0.567900  | 0  | -10.399285 | 4.995557   | 0.932786  | L         |
| H-HC-0.112300  | 0  | -12.535643 | 6.027132   | -1.012875 | L         |
| H-HC-0.112300  | 0  | -12.728440 | 4.728855   | 0.189561  | L         |
| H-HC-0.112300  | 0  | -12.177151 | 4.331398   | -1.453078 | L         |
| N-N--0.415700  | 0  | -9.864728  | 5.703639   | -1.145446 | L         |
| C-CT--0.025200 | -1 | -8.431443  | 5.866603   | -0.917582 | L         |
| C-C-0.597300   | 0  | -7.612622  | 5.793250   | -2.181824 | L         |
| O-O--0.567900  | 0  | -8.113229  | 6.141159   | -3.258379 | L         |
| H-H-0.271900   | 0  | -10.175576 | 5.866155   | -2.090784 | L         |
| H-H1-0.069800  | 0  | -8.111903  | 5.058925   | -0.268488 | L         |
| H-H1-0.069800  | 0  | -8.232454  | 6.816711   | -0.423901 | L         |
| N-N--0.415700  | 0  | -6.364716  | 5.350987   | -2.015628 | L H-H1 48 |
| C-CT--0.530209 | -1 | -5.348815  | 5.286983   | -3.063668 | H         |
| C-C-0.568093   | 0  | -4.652401  | 3.939586   | -2.969479 | H         |
| O-O--0.528105  | 0  | -4.671957  | 3.285030   | -1.922310 | H         |
| C-CT-0.298500  | 0  | -4.377620  | 6.487915   | -2.971506 | L H-H1 48 |
| C-CT--0.319200 | 0  | -5.105529  | 7.806832   | -3.243755 | L         |
| C-CT--0.319200 | 0  | -3.670164  | 6.571933   | -1.616443 | L         |
| H-H-0.271900   | 0  | -6.074705  | 5.024099   | -1.096360 | L         |
| H-H1-0.184096  | 0  | -5.864416  | 5.376796   | -4.027486 | H         |
| H-HC--0.029700 | 0  | -3.617595  | 6.378145   | -3.743237 | L         |
| H-HC-0.079100  | 0  | -5.814636  | 8.013910   | -2.444121 | L         |

|                |    |            |           |            |           |
|----------------|----|------------|-----------|------------|-----------|
| H-HC-0.079100  | 0  | -5.637739  | 7.738374  | -4.191185  | L         |
| H-HC-0.079100  | 0  | -4.377453  | 8.615123  | -3.296188  | L         |
| H-HC-0.079100  | 0  | -4.391059  | 6.691753  | -0.809722  | L         |
| H-HC-0.079100  | 0  | -2.978566  | 7.411757  | -1.610659  | L         |
| H-HC-0.079100  | 0  | -3.103998  | 5.654776  | -1.440940  | L         |
| N-N--0.610103  | 0  | -3.985505  | 3.543508  | -4.077772  | H         |
| C-CT--0.314060 | -1 | -4.238673  | 3.989440  | -5.438339  | H         |
| C-C-0.597300   | 0  | -5.350597  | 3.165314  | -6.079558  | L H-H1 50 |
| O-O--0.567900  | 0  | -5.476149  | 1.958680  | -5.869277  | L         |
| C-CT--0.110200 | 0  | -2.938036  | 3.887910  | -6.273237  | L H-H1 50 |
| C-CT-0.353100  | 0  | -1.930601  | 5.040143  | -6.043704  | L         |
| C-CT--0.412100 | 0  | -1.072729  | 4.901921  | -4.785537  | L         |
| C-CT--0.412100 | 0  | -0.965729  | 5.126237  | -7.231338  | L         |
| H-H-0.398207   | 0  | -3.385830  | 2.728105  | -3.952816  | H         |
| H-H1-0.165130  | 0  | -4.547329  | 5.034741  | -5.447657  | H         |
| H-HC-0.045700  | 0  | -3.225275  | 3.907101  | -7.324525  | L         |
| H-HC-0.045700  | 0  | -2.449824  | 2.931212  | -6.089576  | L         |
| H-HC--0.036100 | 0  | -2.477126  | 5.982734  | -5.996473  | L         |
| H-HC-0.100000  | 0  | -0.482115  | 3.989017  | -4.831778  | L         |
| H-HC-0.100000  | 0  | -1.711466  | 4.845604  | -3.903381  | L         |
| H-HC-0.100000  | 0  | -0.415219  | 5.762481  | -4.676624  | L         |
| H-HC-0.100000  | 0  | -0.401455  | 4.198137  | -7.312939  | L         |
| H-HC-0.100000  | 0  | -0.274342  | 5.954560  | -7.078311  | L         |
| H-HC-0.100000  | 0  | -1.524441  | 5.297328  | -8.149570  | L         |
| N-N--0.415700  | 0  | -6.141683  | 3.815611  | -6.927356  | L         |
| C-CT--0.038900 | -1 | -7.331813  | 3.216455  | -7.542776  | L         |
| C-C-0.597300   | 0  | -7.088156  | 1.879052  | -8.231963  | L         |
| O-O--0.567900  | 0  | -7.971083  | 1.024476  | -8.276970  | L         |
| C-CT-0.365400  | -1 | -7.969973  | 4.138915  | -8.605690  | L         |
| O-OH--0.676100 | -1 | -7.907836  | 5.496953  | -8.160357  | L         |
| C-CT--0.243800 | 0  | -9.449010  | 3.849788  | -8.862544  | L         |
| H-H-0.271900   | 0  | -6.020839  | 4.814311  | -7.008169  | L         |
| H-H1-0.100700  | 0  | -8.069761  | 3.077145  | -6.759720  | L         |
| H-H1-0.004300  | 0  | -7.415844  | 4.060948  | -9.542104  | L         |
| H-HC-0.064200  | 0  | -9.565975  | 2.845786  | -9.269962  | L         |
| H-HC-0.064200  | 0  | -9.843527  | 4.563481  | -9.585556  | L         |
| H-HC-0.064200  | 0  | -10.011130 | 3.922065  | -7.930671  | L         |
| H-HO-0.410200  | -1 | -8.805989  | 5.832267  | -8.124735  | L         |
| N-N--0.415700  | 0  | -5.911502  | 1.741057  | -8.839753  | L         |
| C-CT--0.025200 | -1 | -5.526655  | 0.583175  | -9.632946  | L         |
| C-C-0.597300   | 0  | -4.631316  | -0.421721 | -8.937508  | L         |
| O-O--0.567900  | 0  | -4.134475  | -1.324641 | -9.611631  | L         |
| H-H-0.271900   | 0  | -5.222999  | 2.452889  | -8.646193  | L         |
| H-H1-0.069800  | 0  | -4.996347  | 0.929166  | -10.518947 | L         |
| H-H1-0.069800  | 0  | -6.415585  | 0.049446  | -9.968909  | L         |
| N-N--0.415700  | 0  | -4.419307  | -0.247927 | -7.628110  | L H-H1 54 |
| C-CT--0.539097 | -1 | -3.481041  | -1.022699 | -6.827632  | H         |
| C-C-0.572106   | 0  | -4.213314  | -1.478635 | -5.565172  | H         |
| O-O--0.533001  | 0  | -4.932816  | -2.472652 | -5.630452  | H         |
| C-CT-0.130300  | 0  | -2.139645  | -0.264766 | -6.626450  | L H-H1 54 |
| C-CT--0.043000 | 0  | -1.535644  | 0.250327  | -7.954830  | L         |
| C-CT--0.320400 | 0  | -1.167634  | -1.236799 | -5.935208  | L         |
| C-CT--0.066000 | 0  | -0.214429  | 1.015519  | -7.799776  | L         |
| H-H-0.271900   | 0  | -4.883708  | 0.523824  | -7.157108  | L         |

|                |    |            |           |           |           |
|----------------|----|------------|-----------|-----------|-----------|
| H-H1-0.180646  | 0  | -3.259758  | -1.940828 | -7.381912 | H         |
| H-HC-0.018700  | 0  | -2.307816  | 0.592743  | -5.975778 | L         |
| H-HC-0.023600  | 0  | -2.240436  | 0.939809  | -8.418121 | L         |
| H-HC-0.023600  | 0  | -1.382820  | -0.589442 | -8.633781 | L         |
| H-HC-0.088200  | 0  | -0.971525  | -2.094822 | -6.576415 | L         |
| H-HC-0.088200  | 0  | -1.585621  | -1.584317 | -4.992018 | L         |
| H-HC-0.088200  | 0  | -0.231968  | -0.737793 | -5.696209 | L         |
| H-HC-0.018600  | 0  | -0.329597  | 1.801578  | -7.054208 | L         |
| H-HC-0.018600  | 0  | 0.053398   | 1.468138  | -8.754478 | L         |
| H-HC-0.018600  | 0  | 0.587021   | 0.340877  | -7.500237 | L         |
| N-N--0.611145  | 0  | -4.071275  | -0.721380 | -4.443083 | H         |
| C-CT--0.109296 | -1 | -4.642328  | -1.117342 | -3.164407 | H         |
| C-C-0.597300   | 0  | -6.169666  | -1.141901 | -3.176638 | L H-H1 56 |
| O-O--0.567900  | 0  | -6.800440  | -2.079834 | -2.673180 | L         |
| C-CT--0.388038 | 0  | -4.114851  | -0.301501 | -2.003464 | H         |
| H-H-0.369964   | 0  | -3.433024  | 0.064876  | -4.419522 | H         |
| H-H1-0.178541  | 0  | -4.389645  | -2.168085 | -2.980189 | H         |
| H-H1-0.157964  | 0  | -4.732685  | -0.554859 | -1.136687 | H         |
| H-H1-0.179833  | 0  | -4.175224  | 0.777164  | -2.169036 | H         |
| H-HS-0.319500  | 0  | -2.152932  | 0.187439  | -0.788331 | H         |
| N-N--0.415700  | 0  | -6.761244  | -0.143447 | -3.819044 | L         |
| C-CT--0.087500 | -1 | -8.199731  | -0.078813 | -4.059341 | L         |
| C-C-0.597300   | 0  | -8.688457  | -1.229006 | -4.926745 | L         |
| O-O--0.567900  | 0  | -9.634900  | -1.922364 | -4.553730 | L         |
| C-CT-0.298500  | 0  | -8.596433  | 1.284604  | -4.645174 | L         |
| C-CT--0.319200 | 0  | -10.113769 | 1.416249  | -4.835717 | L         |
| C-CT--0.319200 | 0  | -8.144456  | 2.459531  | -3.763576 | L         |
| H-H-0.271900   | 0  | -6.126201  | 0.549222  | -4.208956 | L         |
| H-H1-0.096900  | 0  | -8.700526  | -0.177995 | -3.098850 | L         |
| H-HC--0.029700 | 0  | -8.121457  | 1.369371  | -5.614229 | L         |
| H-HC-0.079100  | 0  | -10.620514 | 1.270308  | -3.881512 | L         |
| H-HC-0.079100  | 0  | -10.468235 | 0.674343  | -5.550976 | L         |
| H-HC-0.079100  | 0  | -10.350491 | 2.406429  | -5.224018 | L         |
| H-HC-0.079100  | 0  | -8.594228  | 2.393484  | -2.774833 | L         |
| H-HC-0.079100  | 0  | -8.421379  | 3.407846  | -4.223258 | L         |
| H-HC-0.079100  | 0  | -7.059776  | 2.456969  | -3.648329 | L         |
| N-N--0.415700  | 0  | -8.051667  | -1.443677 | -6.076582 | L         |
| C-CT--0.025200 | -1 | -8.412593  | -2.501546 | -7.017126 | L         |
| C-C-0.597300   | 0  | -8.322060  | -3.902441 | -6.425444 | L         |
| O-O--0.567900  | 0  | -9.219297  | -4.719642 | -6.621607 | L         |
| H-H-0.271900   | 0  | -7.252001  | -0.856183 | -6.276828 | L         |
| H-H1-0.069800  | 0  | -7.746510  | -2.451335 | -7.878199 | L         |
| H-H1-0.069800  | 0  | -9.433900  | -2.339621 | -7.361251 | L         |
| N-N--0.415700  | 0  | -7.240031  | -4.175946 | -5.698749 | L         |
| C-CT--0.025200 | -1 | -7.017002  | -5.440349 | -5.008588 | L         |
| C-C-0.597300   | 0  | -7.949227  | -5.700400 | -3.836520 | L         |
| O-O--0.567900  | 0  | -8.285622  | -6.851742 | -3.564713 | L         |
| H-H-0.271900   | 0  | -6.525609  | -3.452579 | -5.629619 | L         |
| H-H1-0.069800  | 0  | -5.993808  | -5.457113 | -4.634793 | L         |
| H-H1-0.069800  | 0  | -7.134268  | -6.257785 | -5.720128 | L         |
| N-N--0.415700  | 0  | -8.335015  | -4.642508 | -3.127139 | L         |
| C-CT--0.038900 | -1 | -9.384673  | -4.696694 | -2.107357 | L         |
| C-C-0.597300   | 0  | -10.756054 | -4.989685 | -2.706826 | L         |
| O-O--0.567900  | 0  | -11.499286 | -5.823417 | -2.188690 | L         |



|                |    |            |           |           |   |
|----------------|----|------------|-----------|-----------|---|
| C-CT-0.365400  | 0  | -9.418892  | -3.390855 | -1.298571 | L |
| O-OH--0.676100 | 0  | -8.179909  | -3.219911 | -0.648625 | L |
| C-CT--0.243800 | 0  | -10.501744 | -3.395985 | -0.220076 | L |
| H-H-0.271900   | 0  | -7.942291  | -3.739821 | -3.372722 | L |
| H-H1-0.100700  | 0  | -9.156827  | -5.509140 | -1.417505 | L |
| H-H1-0.004300  | 0  | -9.587981  | -2.543260 | -1.962886 | L |
| H-HC-0.064200  | 0  | -11.483466 | -3.291530 | -0.680707 | L |
| H-HC-0.064200  | 0  | -10.344374 | -2.561746 | 0.463166  | L |
| H-HC-0.064200  | 0  | -10.466816 | -4.332542 | 0.334671  | L |
| H-HO-0.410200  | 0  | -7.592923  | -2.766121 | -1.287492 | L |
| N-N--0.415700  | 0  | -11.106611 | -4.284941 | -3.783918 | L |
| C-CT--0.149000 | -1 | -12.339316 | -4.479065 | -4.519224 | L |
| H-H-0.271900   | 0  | -10.440416 | -3.601914 | -4.134160 | L |
| H-H1-0.097600  | 0  | -12.416000 | -3.727745 | -5.306159 | L |
| H-H1-0.097600  | 0  | -13.191131 | -4.393008 | -3.843274 | L |
| H-H1-0.097600  | 0  | -12.336735 | -5.472571 | -4.970682 | L |
| N-N2--0.511415 | 0  | 2.009814   | 0.005678  | -1.668114 | H |
| C-CA-0.057801  | 0  | 0.852721   | 0.678971  | -1.573849 | H |
| C-CA-0.063496  | 0  | 0.232767   | 1.268640  | -2.675571 | H |
| C-CA--0.109122 | 0  | 0.872741   | 1.180485  | -3.913742 | H |
| C-CA--0.164490 | 0  | 2.089214   | 0.520737  | -4.005945 | H |
| C-CA-0.098392  | 0  | 2.617811   | -0.065810 | -2.862648 | H |
| C-C-0.541263   | 0  | -1.139631  | 1.897826  | -2.632519 | H |
| O-O--0.574884  | 0  | -1.752690  | 1.899129  | -3.713989 | H |
| H-H4-0.220889  | 0  | 0.418517   | 0.738153  | -0.580894 | H |
| H-HA-0.160434  | 0  | 0.391040   | 1.620460  | -4.778154 | H |
| H-HA-0.142191  | 0  | 2.621711   | 0.453176  | -4.946599 | H |
| H-H4-0.174502  | 0  | 3.545731   | -0.626441 | -2.887537 | H |
| H-H-0.353801   | 0  | -1.493707  | 1.973623  | -0.399163 | H |
| Zn-ZN-0.974537 | 0  | 2.843295   | -1.105754 | -0.010546 | H |
| O-OW--0.834000 | 0  | -2.127490  | -7.250029 | 3.506267  | L |
| H-HW-0.417000  | 0  | -2.560481  | -6.671440 | 2.858747  | L |
| H-HW-0.417000  | 0  | -2.854821  | -7.790818 | 3.855253  | L |
| O-OW--0.783903 | 0  | 1.312872   | -2.584515 | -0.136233 | H |
| H-HW-0.401253  | 0  | 0.929464   | -2.477829 | 0.768936  | H |
| H-HW-0.424111  | 0  | 1.923851   | -3.364638 | -0.181093 | H |
| O-OW--0.834000 | 0  | -3.689329  | -8.439219 | 7.246963  | L |
| H-HW-0.417000  | 0  | -3.747179  | -7.494679 | 7.412077  | L |
| H-HW-0.417000  | 0  | -3.812002  | -8.517858 | 6.288665  | L |
| O-OW--0.834000 | 0  | 7.150639   | -0.013483 | 1.778573  | L |
| H-HW-0.417000  | 0  | 6.848588   | 0.407860  | 2.603845  | L |
| H-HW-0.417000  | 0  | 6.357825   | 0.066349  | 1.224060  | L |
| O-OW--0.834000 | 0  | 7.059743   | -4.944573 | 4.764192  | L |
| H-HW-0.417000  | 0  | 6.109752   | -5.004555 | 4.992968  | L |
| H-HW-0.417000  | 0  | 7.261762   | -5.820138 | 4.432173  | L |
| O-OW--0.834000 | 0  | 8.638001   | -0.919135 | -0.254848 | L |
| H-HW-0.417000  | 0  | 8.153855   | -0.548423 | 0.511173  | L |
| H-HW-0.417000  | 0  | 8.840709   | -0.129414 | -0.776990 | L |
| O-OW--0.834000 | 0  | 12.649258  | -1.083193 | -2.004184 | L |
| H-HW-0.417000  | 0  | 11.794612  | -0.832580 | -2.395239 | L |
| H-HW-0.417000  | 0  | 12.652002  | -2.046712 | -2.111778 | L |
| O-OW--0.834000 | 0  | 8.295706   | -3.288593 | 0.986870  | L |
| H-HW-0.417000  | 0  | 8.508143   | -2.519695 | 0.417496  | L |
| H-HW-0.417000  | 0  | 7.562681   | -2.951897 | 1.512550  | L |

|                |   |           |           |           |   |
|----------------|---|-----------|-----------|-----------|---|
| O-OW--0.834000 | 0 | 4.367125  | -4.899308 | 5.157620  | L |
| H-HW-0.417000  | 0 | 4.094675  | -4.514794 | 6.013727  | L |
| H-HW-0.417000  | 0 | 4.066518  | -4.232884 | 4.529038  | L |
| S-SH--0.326142 | 0 | -2.380829 | -0.807949 | -1.657839 | H |
| O-OW--0.834000 | 0 | -1.590852 | 2.398068  | -1.534032 | H |

**PC<sub>e</sub>**

|                |    |            |           |           |           |
|----------------|----|------------|-----------|-----------|-----------|
| C-CT--0.366200 | -1 | -10.314696 | 3.925855  | 4.004262  | L         |
| C-C-0.597200   | 0  | -8.984570  | 3.273910  | 3.762220  | L         |
| O-O--0.567900  | 0  | -8.411929  | 2.701503  | 4.682570  | L         |
| H-HC-0.112300  | 0  | -11.056666 | 3.465756  | 3.354682  | L         |
| H-HC-0.112300  | 0  | -10.234093 | 4.987619  | 3.777846  | L         |
| H-HC-0.112300  | 0  | -10.595598 | 3.787701  | 5.045900  | L         |
| N-N--0.415700  | 0  | -8.519635  | 3.364285  | 2.523318  | L         |
| C-CT--0.059700 | -1 | -7.346516  | 2.651521  | 2.010554  | L         |
| C-C-0.597300   | 0  | -6.198729  | 3.631529  | 1.827865  | L         |
| O-O--0.567900  | 0  | -6.358893  | 4.638785  | 1.144625  | L         |
| C-CT-0.130300  | 0  | -7.697079  | 1.909489  | 0.696418  | L         |
| C-CT--0.043000 | 0  | -8.890821  | 0.941171  | 0.899451  | L         |
| C-CT--0.320400 | 0  | -6.476809  | 1.126772  | 0.182323  | L         |
| C-CT--0.066000 | 0  | -9.415267  | 0.305674  | -0.393095 | L         |
| H-H-0.271900   | 0  | -9.052241  | 3.930491  | 1.871236  | L         |
| H-H1-0.086900  | 0  | -7.037281  | 1.901710  | 2.738629  | L         |
| H-HC-0.018700  | 0  | -7.973997  | 2.649897  | -0.056325 | L         |
| H-HC-0.023600  | 0  | -9.729718  | 1.479789  | 1.338403  | L         |
| H-HC-0.023600  | 0  | -8.603016  | 0.148705  | 1.591507  | L         |
| H-HC-0.088200  | 0  | -6.185629  | 0.354516  | 0.894596  | L         |
| H-HC-0.088200  | 0  | -5.631147  | 1.796726  | 0.021711  | L         |
| H-HC-0.088200  | 0  | -6.698102  | 0.672480  | -0.781367 | L         |
| H-HC-0.018600  | 0  | -9.640789  | 1.081625  | -1.123543 | L         |
| H-HC-0.018600  | 0  | -10.329354 | -0.245958 | -0.176475 | L         |
| H-HC-0.018600  | 0  | -8.680127  | -0.386467 | -0.800683 | L         |
| N-N--0.516300  | 0  | -5.080986  | 3.341544  | 2.489219  | L         |
| C-CT-0.038100  | -1 | -3.779822  | 3.984909  | 2.372298  | L H-HC 30 |
| C-C-0.536600   | 0  | -3.710707  | 5.509867  | 2.152819  | L         |
| O-O--0.581900  | 0  | -2.726157  | 6.045514  | 1.644767  | L         |
| C-CT--0.547145 | 0  | -3.006901  | 3.238743  | 1.265443  | H         |
| C-C-0.532653   | 0  | -2.405048  | 1.951394  | 1.733620  | H         |
| O-O2--0.588507 | 0  | -2.599088  | 1.431412  | 2.820036  | H         |
| O-O2--0.625559 | 0  | -1.568256  | 1.347463  | 0.868982  | H         |
| H-H-0.293600   | 0  | -5.054975  | 2.456347  | 2.978475  | L         |
| H-H1-0.088000  | 0  | -3.245600  | 3.819762  | 3.308530  | L         |
| H-HC-0.128435  | 0  | -2.163649  | 3.851511  | 0.913970  | H         |
| H-HC-0.183556  | 0  | -3.621811  | 3.110157  | 0.365286  | H         |
| N-N--0.415700  | 0  | -4.689461  | 6.262044  | 2.633203  | L         |
| C-CT--0.025200 | -1 | -4.654516  | 7.704026  | 2.487000  | L         |
| C-C-0.597300   | 0  | -3.759086  | 8.351479  | 3.529132  | L         |
| O-O--0.567900  | 0  | -4.236979  | 9.021007  | 4.446487  | L         |
| H-H-0.271900   | 0  | -5.526003  | 5.768961  | 2.903441  | L         |
| H-H1-0.069800  | 0  | -5.663057  | 8.096986  | 2.605877  | L         |
| H-H1-0.069800  | 0  | -4.299955  | 7.974414  | 1.490915  | L         |
| N-N--0.415700  | 0  | -2.455502  | 8.136185  | 3.386609  | L         |
| C-CT--0.038900 | -1 | -1.432224  | 8.568936  | 4.326851  | L         |
| C-C-0.597300   | 0  | -0.517667  | 9.642804  | 3.726413  | L         |

|                |    |           |           |           |   |
|----------------|----|-----------|-----------|-----------|---|
| O-O--0.567900  | 0  | -0.608121 | 9.999850  | 2.550696  | L |
| C-CT-0.365400  | 0  | -0.595293 | 7.416847  | 4.926937  | L |
| O-OH--0.676100 | 0  | 0.604434  | 7.242143  | 4.215589  | L |
| C-CT--0.243800 | 0  | -1.310331 | 6.074541  | 5.041126  | L |
| H-H-0.271900   | 0  | -2.192577 | 7.536849  | 2.606398  | L |
| H-H1-0.100700  | 0  | -1.938017 | 9.039012  | 5.168269  | L |
| H-H1-0.004300  | 0  | -0.316537 | 7.719323  | 5.936909  | L |
| H-HC-0.064200  | 0  | -2.254252 | 6.204854  | 5.568335  | L |
| H-HC-0.064200  | 0  | -0.681020 | 5.382591  | 5.595815  | L |
| H-HC-0.064200  | 0  | -1.498232 | 5.657947  | 4.052107  | L |
| H-HO-0.410200  | 0  | 1.091930  | 6.486591  | 4.609506  | L |
| N-N--0.415700  | 0  | 0.393978  | 10.162233 | 4.552617  | L |
| C-CT--0.025200 | -1 | 1.436657  | 11.094353 | 4.137041  | L |
| C-C-0.597300   | 0  | 2.338875  | 10.602130 | 3.014493  | L |
| O-O--0.567900  | 0  | 2.676014  | 11.376888 | 2.124192  | L |
| H-H-0.271900   | 0  | 0.450381  | 9.765784  | 5.475406  | L |
| H-H1-0.069800  | 0  | 2.070749  | 11.328860 | 4.990873  | L |
| H-H1-0.069800  | 0  | 0.966385  | 12.018215 | 3.799663  | L |
| N-N--0.516300  | 0  | 2.733200  | 9.332578  | 3.073099  | L |
| C-CT-0.038100  | -1 | 3.642714  | 8.732345  | 2.098039  | L |
| C-C-0.536600   | 0  | 3.014087  | 8.439802  | 0.748915  | L |
| O-O--0.581900  | 0  | 3.747584  | 8.140537  | -0.187035 | L |
| C-CT--0.030300 | 0  | 4.225879  | 7.419753  | 2.652598  | L |
| C-C-0.799400   | -1 | 5.572270  | 7.621749  | 3.329710  | L |
| O-O2--0.801400 | -1 | 6.153035  | 8.725497  | 3.245481  | L |
| O-O2--0.801400 | -1 | 6.031464  | 6.669880  | 3.993266  | L |
| H-H-0.293600   | 0  | 2.357475  | 8.727921  | 3.789867  | L |
| H-H1-0.088000  | 0  | 4.445788  | 9.438265  | 1.883678  | L |
| H-HC--0.012200 | 0  | 4.382183  | 6.702831  | 1.844816  | L |
| H-HC--0.012200 | 0  | 3.522369  | 6.965266  | 3.353412  | L |
| N-N--0.415700  | 0  | 1.692538  | 8.528059  | 0.633958  | L |
| C-CT--0.002400 | -1 | 0.973857  | 8.316082  | -0.615318 | L |
| C-C-0.597300   | 0  | 0.377670  | 9.607251  | -1.177799 | L |
| O-O--0.567900  | 0  | 0.361932  | 9.813898  | -2.391325 | L |
| C-CT--0.034300 | 0  | -0.091479 | 7.227712  | -0.431446 | L |
| C-CA-0.011800  | 0  | 0.435552  | 5.911661  | 0.116796  | L |
| C-CA--0.125600 | 0  | 1.083019  | 4.984942  | -0.720608 | L |
| C-CA--0.125600 | 0  | 0.247132  | 5.598854  | 1.472873  | L |
| C-CA--0.170400 | 0  | 1.520139  | 3.753298  | -0.197895 | L |
| C-CA--0.170400 | 0  | 0.659394  | 4.361806  | 1.992302  | L |
| C-CA--0.107200 | 0  | 1.290426  | 3.434611  | 1.150315  | L |
| H-H-0.271900   | 0  | 1.171997  | 8.729992  | 1.474881  | L |
| H-H1-0.097800  | 0  | 1.663303  | 7.945333  | -1.372996 | L |
| H-HC-0.029500  | 0  | -0.556902 | 7.031394  | -1.398219 | L |
| H-HC-0.029500  | 0  | -0.870974 | 7.603873  | 0.232881  | L |
| H-HA-0.133000  | 0  | 1.208344  | 5.202106  | -1.770155 | L |
| H-HA-0.133000  | 0  | -0.271896 | 6.299373  | 2.101200  | L |
| H-HA-0.143000  | 0  | 1.988909  | 3.023784  | -0.837702 | L |
| H-HA-0.143000  | 0  | 0.451483  | 4.111163  | 3.021142  | L |
| H-HA-0.129700  | 0  | 1.563662  | 2.463194  | 1.528780  | L |
| N-N--0.415700  | 0  | -0.077573 | 10.505419 | -0.301558 | L |
| C-CT--0.149000 | -1 | -0.473218 | 11.850540 | -0.667661 | L |
| H-H-0.271900   | 0  | -0.072411 | 10.246124 | 0.679710  | L |
| H-H1-0.097600  | 0  | -0.862369 | 12.367631 | 0.209860  | L |

|                |    |           |           |           |   |
|----------------|----|-----------|-----------|-----------|---|
| H-H1-0.097600  | 0  | -1.244106 | 11.807640 | -1.438900 | L |
| H-H1-0.097600  | 0  | 0.392075  | 12.390668 | -1.054726 | L |
| C-CT--0.366200 | -1 | 7.983813  | 8.429589  | -0.178837 | L |
| C-C-0.597200   | 0  | 7.523528  | 7.630818  | -1.375743 | L |
| O-O--0.567900  | 0  | 8.345620  | 7.283186  | -2.220042 | L |
| H-HC-0.112300  | 0  | 7.526662  | 9.416295  | -0.204551 | L |
| H-HC-0.112300  | 0  | 9.067403  | 8.518364  | -0.201842 | L |
| H-HC-0.112300  | 0  | 7.684575  | 7.915029  | 0.735187  | L |
| N-N--0.415700  | 0  | 6.214295  | 7.381665  | -1.471171 | L |
| C-CT--0.051800 | -1 | 5.562653  | 6.847958  | -2.675102 | L |
| C-C-0.597300   | 0  | 4.922469  | 7.971849  | -3.489995 | L |
| O-O--0.567900  | 0  | 5.306926  | 8.236971  | -4.629399 | L |
| C-CT--0.110200 | 0  | 4.618890  | 5.673738  | -2.332676 | L |
| C-CT-0.353100  | 0  | 4.572740  | 4.613393  | -3.453280 | L |
| C-CT--0.412100 | 0  | 3.798219  | 3.378447  | -3.008726 | L |
| C-CT--0.412100 | 0  | 3.913791  | 5.102795  | -4.745387 | L |
| H-H-0.271900   | 0  | 5.609292  | 7.703050  | -0.722598 | L |
| H-H1-0.092200  | 0  | 6.349970  | 6.441759  | -3.311295 | L |
| H-HC-0.045700  | 0  | 3.614291  | 6.037704  | -2.115522 | L |
| H-HC-0.045700  | 0  | 4.993709  | 5.183720  | -1.433869 | L |
| H-HC--0.036100 | 0  | 5.592042  | 4.297180  | -3.679722 | L |
| H-HC-0.100000  | 0  | 2.737029  | 3.610596  | -2.924491 | L |
| H-HC-0.100000  | 0  | 4.166367  | 3.028725  | -2.046019 | L |
| H-HC-0.100000  | 0  | 3.932346  | 2.583274  | -3.738867 | L |
| H-HC-0.100000  | 0  | 2.932635  | 5.525392  | -4.525199 | L |
| H-HC-0.100000  | 0  | 3.797330  | 4.272631  | -5.441091 | L |
| H-HC-0.100000  | 0  | 4.536263  | 5.857848  | -5.220619 | L |
| N-N--0.415700  | 0  | 3.976494  | 8.657697  | -2.862379 | L |
| C-CT--0.149000 | -1 | 3.356831  | 9.877457  | -3.311466 | L |
| H-H-0.271900   | 0  | 3.777254  | 8.345857  | -1.919049 | L |
| H-H1-0.097600  | 0  | 4.070049  | 10.471463 | -3.884341 | L |
| H-H1-0.097600  | 0  | 3.014700  | 10.453579 | -2.450480 | L |
| H-H1-0.097600  | 0  | 2.498420  | 9.639688  | -3.941953 | L |
| C-CT--0.366200 | -1 | -8.731032 | 2.391495  | 8.116861  | L |
| C-C-0.597200   | 0  | -7.860282 | 1.179798  | 7.941998  | L |
| O-O--0.567900  | 0  | -7.544583 | 0.499550  | 8.911652  | L |
| H-HC-0.112300  | 0  | -9.647749 | 2.252576  | 7.547035  | L |
| H-HC-0.112300  | 0  | -8.197876 | 3.266633  | 7.748485  | L |
| H-HC-0.112300  | 0  | -8.962568 | 2.514735  | 9.172666  | L |
| N-N--0.415700  | 0  | -7.467044 | 0.925943  | 6.702092  | L |
| C-CT--0.038900 | -1 | -6.669290 | -0.231302 | 6.292482  | L |
| C-C-0.597300   | 0  | -5.399518 | 0.245032  | 5.610471  | L |
| O-O--0.567900  | 0  | -5.430091 | 0.653226  | 4.450007  | L |
| C-CT-0.365400  | 0  | -7.478876 | -1.198188 | 5.414737  | L |
| O-OH--0.676100 | 0  | -8.033506 | -0.536140 | 4.303959  | L |
| C-CT--0.243800 | 0  | -8.628836 | -1.816370 | 6.215482  | L |
| H-H-0.271900   | 0  | -7.794187 | 1.546050  | 5.964894  | L |
| H-H1-0.100700  | 0  | -6.371304 | -0.792974 | 7.177480  | L |
| H-H1-0.004300  | 0  | -6.822048 | -1.995535 | 5.064876  | L |
| H-HC-0.064200  | 0  | -8.231579 | -2.347538 | 7.080055  | L |
| H-HC-0.064200  | 0  | -9.183552 | -2.515246 | 5.595497  | L |
| H-HC-0.064200  | 0  | -9.314767 | -1.039018 | 6.550411  | L |
| H-HO-0.410200  | 0  | -7.338506 | 0.040146  | 3.954203  | L |
| N-N--0.415700  | 0  | -4.313199 | 0.251997  | 6.387384  | L |

|                |    |           |           |          |           |
|----------------|----|-----------|-----------|----------|-----------|
| C-CT--0.059700 | -1 | -3.115619 | 1.062511  | 6.155408 | L         |
| C-C-0.597300   | 0  | -1.871737 | 0.182897  | 6.071249 | L         |
| O-O--0.567900  | 0  | -1.609686 | -0.612974 | 6.978427 | L         |
| C-CT-0.130300  | 0  | -2.983074 | 2.151848  | 7.244640 | L         |
| C-CT--0.043000 | 0  | -4.241131 | 3.042114  | 7.403965 | L         |
| C-CT--0.320400 | 0  | -1.750872 | 3.028852  | 6.978229 | L         |
| C-CT--0.066000 | 0  | -4.687036 | 3.808067  | 6.149068 | L         |
| H-H-0.271900   | 0  | -4.387678 | -0.166083 | 7.300334 | L         |
| H-H1-0.086900  | 0  | -3.221129 | 1.570863  | 5.196962 | L         |
| H-HC-0.018700  | 0  | -2.825616 | 1.652562  | 8.202545 | L         |
| H-HC-0.023600  | 0  | -4.051873 | 3.769340  | 8.194307 | L         |
| H-HC-0.023600  | 0  | -5.073589 | 2.425104  | 7.741468 | L         |
| H-HC-0.088200  | 0  | -1.762414 | 3.375048  | 5.944462 | L         |
| H-HC-0.088200  | 0  | -0.844272 | 2.444521  | 7.135489 | L         |
| H-HC-0.088200  | 0  | -1.733930 | 3.881860  | 7.655262 | L         |
| H-HC-0.018600  | 0  | -3.893194 | 4.466843  | 5.801319 | L         |
| H-HC-0.018600  | 0  | -5.563131 | 4.411044  | 6.388018 | L         |
| H-HC-0.018600  | 0  | -4.953481 | 3.115301  | 5.353825 | L         |
| N-N--0.516300  | 0  | -1.127843 | 0.347773  | 4.978746 | L         |
| C-CT-0.038100  | -1 | 0.180615  | -0.228206 | 4.724692 | L H-HC 17 |
| C-C-0.536600   | 0  | 1.096586  | -0.072818 | 5.945257 | L         |
| O-O--0.581900  | 0  | 1.294265  | 1.018069  | 6.474726 | L         |
| C-CT--0.520019 | 0  | 0.733809  | 0.419458  | 3.441941 | H         |
| C-C-0.636404   | 0  | 0.912159  | -0.506728 | 2.244978 | H         |
| O-O2--0.608036 | 0  | 0.256294  | -1.590468 | 2.150141 | H         |
| O-O2--0.608131 | 0  | 1.751692  | -0.083893 | 1.392272 | H         |
| H-H-0.293600   | 0  | -1.518048 | 0.926276  | 4.239272 | L         |
| H-H1-0.088000  | 0  | 0.042117  | -1.297207 | 4.556308 | L         |
| H-HC-0.132300  | 0  | 1.718801  | 0.841005  | 3.659487 | H         |
| H-HC-0.188993  | 0  | 0.105044  | 1.260293  | 3.135078 | H         |
| N-N--0.415700  | 0  | 1.654280  | -1.181297 | 6.399900 | L         |
| C-CT-0.033700  | -1 | 2.563204  | -1.224755 | 7.522133 | L         |
| C-C-0.597300   | 0  | 3.782959  | -2.046612 | 7.121546 | L         |
| O-O--0.567900  | 0  | 3.831472  | -3.271918 | 7.277993 | L         |
| C-CT--0.182500 | 0  | 1.815207  | -1.778453 | 8.743188 | L         |
| H-H-0.271900   | 0  | 1.361862  | -2.059128 | 5.985283 | L         |
| H-H1-0.082300  | 0  | 2.908976  | -0.218509 | 7.766719 | L         |
| H-HC-0.060300  | 0  | 0.976617  | -1.123095 | 8.981925 | L         |
| H-HC-0.060300  | 0  | 2.491726  | -1.825187 | 9.596222 | L         |
| H-HC-0.060300  | 0  | 1.437423  | -2.778819 | 8.525792 | L         |
| N-N--0.415700  | 0  | 4.755382  | -1.352702 | 6.542666 | L         |
| C-CT-0.018800  | -1 | 5.959299  | -1.937039 | 5.996311 | L H-HC 20 |
| C-C-0.597300   | 0  | 7.158798  | -1.783227 | 6.940355 | L         |
| O-O--0.567900  | 0  | 7.206841  | -0.930851 | 7.829765 | L         |
| C-CT--0.517456 | 0  | 6.204910  | -1.308400 | 4.622279 | H         |
| C-CM-0.287351  | 0  | 5.311747  | -1.774684 | 3.531149 | H         |
| N-N2--0.586994 | 0  | 5.428686  | -3.032075 | 2.955300 | H         |
| C-CM--0.020338 | 0  | 4.331775  | -1.154521 | 2.806259 | H         |
| C-CM-0.242458  | 0  | 4.549682  | -3.110341 | 1.920729 | H         |
| N-N2--0.505070 | 0  | 3.873738  | -1.982739 | 1.801696 | H         |
| H-H-0.271900   | 0  | 4.651010  | -0.343622 | 6.480652 | L         |
| H-H1-0.088100  | 0  | 5.812741  | -3.004153 | 5.862071 | L         |
| H-HC-0.166355  | 0  | 7.253364  | -1.492575 | 4.345324 | H         |
| H-HC-0.174481  | 0  | 6.112490  | -0.227688 | 4.756454 | H         |

|                |    |           |            |           |           |
|----------------|----|-----------|------------|-----------|-----------|
| H-H-0.335795   | 0  | 6.080263  | -3.751744  | 3.259542  | H         |
| H-H4-0.152777  | 0  | 3.952423  | -0.151411  | 2.930724  | H         |
| H-H5-0.209475  | 0  | 4.434626  | -3.974926  | 1.281578  | H         |
| N-N--0.415700  | 0  | 8.162877  | -2.623064  | 6.696011  | L         |
| C-CT--0.149000 | -1 | 9.429500  | -2.554646  | 7.391566  | L         |
| H-H-0.271900   | 0  | 8.010718  | -3.303232  | 5.957885  | L         |
| H-H1-0.097600  | 0  | 10.102435 | -3.325326  | 7.014546  | L         |
| H-H1-0.097600  | 0  | 9.267447  | -2.702244  | 8.460676  | L         |
| H-H1-0.097600  | 0  | 9.878795  | -1.572150  | 7.235711  | L         |
| C-CT--0.366200 | -1 | 8.353880  | -9.389071  | 0.947629  | L         |
| C-C-0.597200   | 0  | 8.734023  | -9.166893  | -0.503912 | L         |
| O-O--0.567900  | 0  | 9.770227  | -8.567777  | -0.764670 | L         |
| H-HC-0.112300  | 0  | 8.271533  | -10.454330 | 1.149884  | L         |
| H-HC-0.112300  | 0  | 7.415176  | -8.880644  | 1.160250  | L         |
| H-HC-0.112300  | 0  | 9.132589  | -8.959068  | 1.577440  | L         |
| N-N--0.254800  | 0  | 7.913994  | -9.624362  | -1.466711 | L         |
| C-CT--0.026600 | -1 | 8.156673  | -9.390118  | -2.892474 | L         |
| C-C-0.589600   | 0  | 8.011646  | -7.917509  | -3.276733 | L         |
| O-O--0.574800  | 0  | 8.726594  | -7.423460  | -4.145489 | L         |
| C-CT--0.007000 | 0  | 7.146199  | -10.281457 | -3.622303 | L         |
| C-CT-0.018900  | 0  | 5.986328  | -10.401000 | -2.632369 | L         |
| C-CT-0.019200  | 0  | 6.679293  | -10.372117 | -1.269223 | L         |
| H-H1-0.064100  | 0  | 9.167929  | -9.704628  | -3.153556 | L         |
| H-HC-0.025300  | 0  | 7.586469  | -11.266666 | -3.783220 | L         |
| H-HC-0.025300  | 0  | 6.826176  | -9.851749  | -4.572843 | L         |
| H-HC-0.021300  | 0  | 5.422653  | -11.322853 | -2.778744 | L         |
| H-HC-0.021300  | 0  | 5.330213  | -9.534448  | -2.728240 | L         |
| H-H1-0.039100  | 0  | 6.033472  | -9.893791  | -0.531468 | L         |
| H-H1-0.039100  | 0  | 6.919750  | -11.389031 | -0.956272 | L         |
| N-N--0.516300  | 0  | 7.087448  | -7.219547  | -2.616234 | L         |
| C-CT-0.039700  | -1 | 6.833096  | -5.793471  | -2.790651 | L         |
| C-C-0.536600   | 0  | 8.091472  | -4.926928  | -2.662883 | L         |
| O-O--0.581900  | 0  | 8.266424  | -3.946178  | -3.389508 | L         |
| C-CT-0.056000  | 0  | 5.733879  | -5.358374  | -1.814922 | L H-HC 24 |
| C-CT--0.515956 | 0  | 5.193972  | -3.977300  | -2.196162 | H         |
| C-C-0.587828   | 0  | 4.112897  | -3.435668  | -1.269160 | H         |
| O-O2--0.600319 | 0  | 4.088710  | -2.154965  | -1.203282 | H         |
| O-O2--0.589127 | 0  | 3.333676  | -4.217878  | -0.676648 | H         |
| H-H-0.293600   | 0  | 6.551592  | -7.695267  | -1.909577 | L         |
| H-H1-0.110500  | 0  | 6.456348  | -5.641972  | -3.802592 | L         |
| H-HC--0.017300 | 0  | 6.131101  | -5.333465  | -0.799036 | L         |
| H-HC--0.017300 | 0  | 4.914467  | -6.077926  | -1.857186 | L         |
| H-HC-0.167759  | 0  | 4.775258  | -4.037461  | -3.208050 | H         |
| H-HC-0.135230  | 0  | 6.014314  | -3.252460  | -2.224790 | H         |
| N-N--0.415700  | 0  | 9.000909  | -5.330015  | -1.777975 | L         |
| C-CT--0.024900 | -1 | 10.241278 | -4.630775  | -1.463564 | L         |
| C-C-0.597300   | 0  | 11.262452 | -4.521578  | -2.588956 | L         |
| O-O--0.567900  | 0  | 12.242167 | -3.787739  | -2.457356 | L         |
| C-CT-0.211700  | 0  | 10.882025 | -5.267877  | -0.224375 | L         |
| O-OH--0.654600 | 0  | 9.926154  | -5.456137  | 0.808661  | L         |
| H-H-0.271900   | 0  | 8.788942  | -6.135859  | -1.206254 | L         |
| H-H1-0.084300  | 0  | 9.976299  | -3.606402  | -1.197146 | L         |
| H-H1-0.035200  | 0  | 11.682658 | -4.621329  | 0.137851  | L         |
| H-H1-0.035200  | 0  | 11.306130 | -6.236695  | -0.492543 | L         |

|                |    |           |           |           |   |
|----------------|----|-----------|-----------|-----------|---|
| H-HO-0.427500  | 0  | 9.380587  | -4.642018 | 0.891619  | L |
| N-N--0.415700  | 0  | 11.024011 | -5.209280 | -3.703816 | L |
| C-CT-0.033700  | -1 | 11.775007 | -5.048703 | -4.942176 | L |
| C-C-0.597300   | 0  | 10.945634 | -4.489446 | -6.102724 | L |
| O-O--0.567900  | 0  | 11.384858 | -4.493252 | -7.251929 | L |
| C-CT--0.182500 | 0  | 12.397027 | -6.412310 | -5.276549 | L |
| H-H-0.271900   | 0  | 10.210539 | -5.814314 | -3.710205 | L |
| H-H1-0.082300  | 0  | 12.593228 | -4.344006 | -4.787671 | L |
| H-HC-0.060300  | 0  | 13.011885 | -6.752536 | -4.442583 | L |
| H-HC-0.060300  | 0  | 13.023821 | -6.323326 | -6.164508 | L |
| H-HC-0.060300  | 0  | 11.608270 | -7.142012 | -5.466598 | L |
| N-N--0.415700  | 0  | 9.761688  | -3.979455 | -5.781289 | L |
| C-CT--0.025200 | -1 | 8.861290  | -3.295239 | -6.686381 | L |
| C-C-0.597300   | 0  | 8.818699  | -1.790673 | -6.468867 | L |
| O-O--0.567900  | 0  | 8.837769  | -1.020002 | -7.425823 | L |
| H-H-0.271900   | 0  | 9.478338  | -4.040622 | -4.809537 | L |
| H-H1-0.069800  | 0  | 7.853039  | -3.682614 | -6.542946 | L |
| H-H1-0.069800  | 0  | 9.151031  | -3.481401 | -7.721004 | L |
| N-N--0.415700  | 0  | 8.758696  | -1.381831 | -5.204484 | L |
| C-CT--0.002400 | -1 | 8.579350  | 0.003836  | -4.787327 | L |
| C-C-0.597300   | 0  | 9.686402  | 0.439670  | -3.821453 | L |
| O-O--0.567900  | 0  | 10.301381 | -0.410438 | -3.168916 | L |
| C-CT--0.034300 | 0  | 7.183767  | 0.124760  | -4.148991 | L |
| C-CA-0.011800  | 0  | 6.055322  | -0.160967 | -5.123180 | L |
| C-CA--0.125600 | 0  | 5.652750  | 0.824976  | -6.044152 | L |
| C-CA--0.125600 | 0  | 5.444445  | -1.429123 | -5.148884 | L |
| C-CA--0.170400 | 0  | 4.655868  | 0.539748  | -6.994902 | L |
| C-CA--0.170400 | 0  | 4.442306  | -1.711559 | -6.094003 | L |
| C-CA--0.107200 | 0  | 4.053551  | -0.730825 | -7.023337 | L |
| H-H-0.271900   | 0  | 8.759858  | -2.087422 | -4.477345 | L |
| H-H1-0.097800  | 0  | 8.617502  | 0.652275  | -5.662775 | L |
| H-HC-0.029500  | 0  | 7.044336  | 1.126910  | -3.744538 | L |
| H-HC-0.029500  | 0  | 7.121161  | -0.570538 | -3.310277 | L |
| H-HA-0.133000  | 0  | 6.116520  | 1.800652  | -6.030988 | L |
| H-HA-0.133000  | 0  | 5.753656  | -2.191941 | -4.449490 | L |
| H-HA-0.143000  | 0  | 4.349426  | 1.298991  | -7.700377 | L |
| H-HA-0.143000  | 0  | 3.968887  | -2.682453 | -6.105587 | L |
| H-HA-0.129700  | 0  | 3.279143  | -0.947980 | -7.745860 | L |
| N-N--0.254800  | 0  | 9.950240  | 1.752455  | -3.686898 | L |
| C-CT--0.026600 | -1 | 10.816741 | 2.248461  | -2.624547 | L |
| C-C-0.589600   | 0  | 10.179743 | 2.011530  | -1.246497 | L |
| O-O--0.574800  | 0  | 8.983907  | 1.711750  | -1.167003 | L |
| C-CT--0.007000 | 0  | 10.984335 | 3.745354  | -2.916934 | L |
| C-CT-0.018900  | 0  | 9.669046  | 4.117231  | -3.599447 | L |
| C-CT-0.019200  | 0  | 9.350948  | 2.865503  | -4.417208 | L |
| H-H1-0.064100  | 0  | 11.783378 | 1.748612  | -2.677057 | L |
| H-HC-0.025300  | 0  | 11.809712 | 3.889484  | -3.615604 | L |
| H-HC-0.025300  | 0  | 11.145902 | 4.334550  | -2.012908 | L |
| H-HC-0.021300  | 0  | 9.771864  | 5.000840  | -4.230099 | L |
| H-HC-0.021300  | 0  | 8.893808  | 4.272711  | -2.846432 | L |
| H-H1-0.039100  | 0  | 8.271806  | 2.761817  | -4.521211 | L |
| H-H1-0.039100  | 0  | 9.815225  | 2.941625  | -5.401253 | L |
| N-N--0.254800  | 0  | 10.945829 | 2.125921  | -0.151415 | L |
| C-CT--0.026600 | -1 | 10.392535 | 2.112428  | 1.195465  | L |

|                |    |           |           |           |           |
|----------------|----|-----------|-----------|-----------|-----------|
| C-C-0.589600   | 0  | 9.343347  | 3.198620  | 1.433393  | L         |
| O-O--0.574800  | 0  | 9.611272  | 4.379507  | 1.223948  | L         |
| C-CT--0.007000 | 0  | 11.592829 | 2.290022  | 2.136262  | L         |
| C-CT-0.018900  | 0  | 12.777957 | 1.800606  | 1.307617  | L         |
| C-CT-0.019200  | 0  | 12.396120 | 2.222496  | -0.108278 | L         |
| H-H1-0.064100  | 0  | 9.949137  | 1.131645  | 1.373295  | L         |
| H-HC-0.025300  | 0  | 11.473666 | 1.708954  | 3.051288  | L         |
| H-HC-0.025300  | 0  | 11.739652 | 3.344923  | 2.375284  | L         |
| H-HC-0.021300  | 0  | 12.838208 | 0.712167  | 1.359895  | L         |
| H-HC-0.021300  | 0  | 13.715261 | 2.256216  | 1.627832  | L         |
| H-H1-0.039100  | 0  | 12.697505 | 3.256161  | -0.283312 | L         |
| H-H1-0.039100  | 0  | 12.870180 | 1.556307  | -0.829845 | L         |
| N-N--0.415700  | 0  | 8.170748  | 2.774141  | 1.894573  | L         |
| C-CT-0.018800  | -1 | 7.015308  | 3.605076  | 2.187931  | L H-HC 33 |
| C-C-0.597300   | 0  | 6.147366  | 3.013821  | 3.296743  | L         |
| O-O--0.567900  | 0  | 6.169775  | 1.805757  | 3.531368  | L         |
| C-CT--0.515368 | 0  | 6.201881  | 3.728136  | 0.872130  | H         |
| C-CM-0.287903  | 0  | 5.602968  | 2.451145  | 0.362952  | H         |
| N-N2--0.582625 | 0  | 6.213573  | 1.665446  | -0.601147 | H         |
| C-CM--0.036893 | 0  | 4.490794  | 1.726673  | 0.722747  | H         |
| C-CM-0.243454  | 0  | 5.482198  | 0.535409  | -0.777912 | H         |
| N-N2--0.523998 | 0  | 4.432820  | 0.537572  | 0.023734  | H         |
| H-H-0.271900   | 0  | 8.026963  | 1.777123  | 1.966612  | L         |
| H-H1-0.088100  | 0  | 7.350561  | 4.598481  | 2.501098  | L         |
| H-HC-0.162301  | 0  | 6.864077  | 4.177287  | 0.117647  | H         |
| H-HC-0.188340  | 0  | 5.411464  | 4.468459  | 1.047481  | H         |
| H-H-0.339448   | 0  | 7.118288  | 1.868386  | -1.026167 | H         |
| H-H4-0.185957  | 0  | 3.736133  | 1.985184  | 1.449630  | H         |
| H-H5-0.211295  | 0  | 5.742950  | -0.254475 | -1.466719 | H         |
| N-N--0.415700  | 0  | 5.367492  | 3.875907  | 3.936782  | L         |
| C-CT-0.014300  | -1 | 4.549535  | 3.599366  | 5.108690  | L         |
| C-C-0.597300   | 0  | 5.202052  | 2.649744  | 6.123417  | L         |
| O-O--0.567900  | 0  | 4.676622  | 1.599268  | 6.496634  | L         |
| C-CT--0.204100 | 0  | 3.078639  | 3.360152  | 4.742737  | L         |
| C-C-0.713000   | 0  | 2.197196  | 4.202653  | 5.648141  | L         |
| N-N--0.919100  | 0  | 1.700851  | 3.677022  | 6.733492  | L         |
| O-O--0.593100  | 0  | 1.982279  | 5.381948  | 5.429517  | L         |
| H-H-0.271900   | 0  | 5.499473  | 4.862007  | 3.705143  | L         |
| H-H1-0.104800  | 0  | 4.553154  | 4.559082  | 5.630901  | L         |
| H-HC-0.079700  | 0  | 2.833903  | 2.307614  | 4.841009  | L         |
| H-HC-0.079700  | 0  | 2.891650  | 3.671606  | 3.715948  | L         |
| H-H-0.419600   | 0  | 1.069880  | 4.240291  | 7.261265  | L         |
| H-H-0.419600   | 0  | 1.742226  | 2.661503  | 6.818899  | L         |
| N-N--0.415700  | 0  | 6.389626  | 3.081301  | 6.561268  | L         |
| C-CT--0.149000 | -1 | 7.293103  | 2.344130  | 7.423309  | L         |
| H-H-0.271900   | 0  | 6.701946  | 3.953343  | 6.156921  | L         |
| H-H1-0.097600  | 0  | 8.041736  | 3.012886  | 7.847524  | L         |
| H-H1-0.097600  | 0  | 7.787619  | 1.559869  | 6.847012  | L         |
| H-H1-0.097600  | 0  | 6.730879  | 1.867253  | 8.229298  | L         |
| C-CT--0.366200 | -1 | -2.256622 | -2.718573 | 9.543564  | L         |
| C-C-0.597200   | 0  | -2.375810 | -3.815000 | 8.520905  | L         |
| O-O--0.567900  | 0  | -2.903254 | -4.882372 | 8.822480  | L         |
| H-HC-0.112300  | 0  | -1.203358 | -2.499290 | 9.707793  | L         |
| H-HC-0.112300  | 0  | -2.717314 | -3.046077 | 10.473059 | L         |



|                |    |           |           |           |           |
|----------------|----|-----------|-----------|-----------|-----------|
| H-HC-0.112300  | 0  | -2.762177 | -1.828756 | 9.172909  | L         |
| N-N--0.347900  | 0  | -1.857532 | -3.554613 | 7.323929  | L         |
| C-CT--0.240000 | -1 | -1.749513 | -4.526211 | 6.229351  | L         |
| C-C-0.734100   | 0  | -0.337186 | -4.565698 | 5.657762  | L         |
| O-O--0.589400  | 0  | 0.483783  | -3.692623 | 5.923168  | L         |
| C-CT--0.009400 | 0  | -2.835245 | -4.240569 | 5.171214  | L         |
| C-CT-0.018700  | 0  | -2.610381 | -2.956322 | 4.361755  | L H-HC 37 |
| C-CT--0.464524 | 0  | -3.707939 | -2.778659 | 3.306438  | H         |
| C-CT--0.195159 | 0  | -3.627373 | -1.468348 | 2.533966  | H         |
| N-N3--0.748751 | 0  | -2.434192 | -1.398132 | 1.622916  | H         |
| H-H-0.274700   | 0  | -1.473521 | -2.622970 | 7.178950  | L         |
| H-H1-0.142600  | 0  | -1.941198 | -5.520114 | 6.634046  | L         |
| H-HC-0.036200  | 0  | -3.804080 | -4.180343 | 5.670014  | L         |
| H-HC-0.036200  | 0  | -2.882869 | -5.072404 | 4.475745  | L         |
| H-HC-0.010300  | 0  | -1.639907 | -2.993437 | 3.866553  | L         |
| H-HC-0.010300  | 0  | -2.639122 | -2.107221 | 5.036424  | L         |
| H-HC-0.173903  | 0  | -4.676813 | -2.796946 | 3.813634  | H         |
| H-HC-0.148535  | 0  | -3.688894 | -3.634411 | 2.617476  | H         |
| H-HP-0.236066  | 0  | -3.592752 | -0.592070 | 3.178426  | H         |
| H-HP-0.172509  | 0  | -4.498874 | -1.372704 | 1.875527  | H         |
| H-H-0.437293   | 0  | -2.345659 | -0.468827 | 1.183337  | H         |
| H-H-0.366736   | 0  | -2.571504 | -2.039160 | 0.829171  | H         |
| H-H-0.419451   | 0  | -1.493062 | -1.574217 | 2.059670  | H         |
| N-N--0.415700  | 0  | -0.042222 | -5.598398 | 4.881107  | L         |
| C-CT--0.025200 | -1 | 1.272371  | -5.799556 | 4.280688  | L         |
| C-C-0.597300   | 0  | 1.147053  | -6.518543 | 2.936758  | L         |
| O-O--0.567900  | 0  | 1.735752  | -7.573325 | 2.707855  | L         |
| H-H-0.271900   | 0  | -0.786955 | -6.249506 | 4.650776  | L         |
| H-H1-0.069800  | 0  | 1.892660  | -6.400061 | 4.946110  | L         |
| H-H1-0.069800  | 0  | 1.764825  | -4.841590 | 4.109936  | L         |
| N-N--0.415700  | 0  | 0.327411  | -5.937134 | 2.065020  | L         |
| C-CT--0.025200 | -1 | -0.236686 | -6.540933 | 0.861246  | L         |
| C-C-0.597300   | 0  | -1.385078 | -5.674472 | 0.411065  | L         |
| O-O--0.567900  | 0  | -2.287120 | -5.442008 | 1.207692  | L         |
| H-H-0.271900   | 0  | -0.114943 | -5.086611 | 2.387607  | L         |
| H-H1-0.069800  | 0  | -0.608550 | -7.539775 | 1.089364  | L         |
| H-H1-0.069800  | 0  | 0.528341  | -6.597695 | 0.086366  | L         |
| N-N--0.415700  | 0  | -1.331128 | -5.200233 | -0.833879 | L         |
| C-CT--0.001400 | -1 | -2.161385 | -4.113954 | -1.359227 | L         |
| C-C-0.597300   | 0  | -3.625408 | -4.186286 | -0.905840 | L         |
| O-O--0.567900  | 0  | -4.182560 | -3.231075 | -0.375065 | L         |
| C-CT--0.015200 | 0  | -2.059071 | -4.094833 | -2.899321 | L         |
| C-CA--0.001100 | 0  | -0.670564 | -4.319332 | -3.474077 | L         |
| C-CA--0.190600 | 0  | 0.356188  | -3.384373 | -3.241030 | L         |
| C-CA--0.190600 | 0  | -0.409180 | -5.470152 | -4.245184 | L         |
| C-CA--0.234100 | 0  | 1.642035  | -3.602099 | -3.772299 | L         |
| C-CA--0.234100 | 0  | 0.874322  | -5.689365 | -4.780521 | L         |
| C-C-0.322600   | 0  | 1.904091  | -4.752688 | -4.543205 | L         |
| O-OH--0.557900 | 0  | 3.138709  | -4.963610 | -5.072476 | L         |
| H-H-0.271900   | 0  | -0.496558 | -5.393163 | -1.369341 | L         |
| H-H1-0.087600  | 0  | -1.737545 | -3.191043 | -0.972103 | L         |
| H-HC-0.029500  | 0  | -2.423071 | -3.138858 | -3.268753 | L         |
| H-HC-0.029500  | 0  | -2.723996 | -4.857614 | -3.304955 | L         |
| H-HA-0.169900  | 0  | 0.162994  | -2.490226 | -2.657039 | L         |

|                |    |            |            |           |   |
|----------------|----|------------|------------|-----------|---|
| H-HA-0.169900  | 0  | -1.202316  | -6.176115  | -4.443131 | L |
| H-HA-0.165600  | 0  | 2.428653   | -2.886553  | -3.589589 | L |
| H-HA-0.165600  | 0  | 1.065747   | -6.564192  | -5.379739 | L |
| H-HO-0.399200  | 0  | 3.144273   | -5.746197  | -5.620730 | L |
| N-N--0.415700  | 0  | -4.229367  | -5.363886  | -1.079847 | L |
| C-CT--0.024900 | -1 | -5.562480  | -5.653434  | -0.572334 | L |
| C-C-0.597300   | 0  | -5.691657  | -5.577253  | 0.947333  | L |
| O-O--0.567900  | 0  | -5.077012  | -6.351563  | 1.690452  | L |
| C-CT-0.211700  | 0  | -6.030025  | -7.045141  | -1.001507 | L |
| O-OH--0.654600 | -1 | -7.283130  | -7.352842  | -0.404987 | L |
| H-H-0.271900   | 0  | -3.661689  | -6.098262  | -1.462159 | L |
| H-H1-0.084300  | 0  | -6.249247  | -4.929140  | -1.010607 | L |
| H-H1-0.035200  | 0  | -5.294764  | -7.784745  | -0.682354 | L |
| H-H1-0.035200  | 0  | -6.117440  | -7.079686  | -2.087481 | L |
| H-HO-0.427500  | -1 | -7.540745  | -8.226315  | -0.709906 | L |
| N-N--0.415700  | 0  | -6.658827  | -4.768013  | 1.373015  | L |
| C-CT-0.033700  | -1 | -7.160824  | -4.667308  | 2.732258  | L |
| C-C-0.597300   | 0  | -7.535358  | -5.986373  | 3.412970  | L |
| O-O--0.567900  | 0  | -7.514351  | -6.072943  | 4.639158  | L |
| C-CT--0.182500 | 0  | -8.339351  | -3.693283  | 2.727185  | L |
| H-H-0.271900   | 0  | -7.102657  | -4.176514  | 0.676919  | L |
| H-H1-0.082300  | 0  | -6.371595  | -4.226509  | 3.340283  | L |
| H-HC-0.060300  | 0  | -8.036422  | -2.734043  | 2.303188  | L |
| H-HC-0.060300  | 0  | -8.682968  | -3.539317  | 3.745438  | L |
| H-HC-0.060300  | 0  | -9.158136  | -4.109495  | 2.146330  | L |
| N-N--0.415700  | 0  | -7.892747  | -7.005652  | 2.631332  | L |
| C-CT--0.025200 | -1 | -8.286923  | -8.311263  | 3.145527  | L |
| C-C-0.597300   | 0  | -7.319194  | -9.447637  | 2.845577  | L |
| O-O--0.567900  | 0  | -7.718287  | -10.610216 | 2.874371  | L |
| H-H-0.271900   | 0  | -7.846058  | -6.850887  | 1.630458  | L |
| H-H1-0.069800  | 0  | -9.249380  | -8.574865  | 2.708293  | L |
| H-H1-0.069800  | 0  | -8.422619  | -8.272364  | 4.226582  | L |
| N-N--0.415700  | 0  | -6.048963  | -9.135649  | 2.594051  | L |
| C-CT--0.024900 | -1 | -4.970745  | -10.122253 | 2.629621  | L |
| C-C-0.597300   | 0  | -4.284035  | -10.078746 | 3.988899  | L |
| O-O--0.567900  | 0  | -3.975416  | -9.001217  | 4.507208  | L |
| C-CT-0.211700  | 0  | -3.966241  | -9.826658  | 1.510476  | L |
| O-OH--0.654600 | -1 | -3.091808  | -10.927127 | 1.314784  | L |
| H-H-0.271900   | 0  | -5.801163  | -8.149950  | 2.589369  | L |
| H-H1-0.084300  | 0  | -5.375791  | -11.120142 | 2.461125  | L |
| H-H1-0.035200  | 0  | -3.393941  | -8.928810  | 1.749643  | L |
| H-H1-0.035200  | 0  | -4.514662  | -9.653064  | 0.583786  | L |
| H-HO-0.427500  | -1 | -2.550990  | -10.741201 | 0.543683  | L |
| N-N--0.415700  | 0  | -4.076060  | -11.254942 | 4.579723  | L |
| C-CT--0.149000 | -1 | -3.535472  | -11.398547 | 5.920163  | L |
| H-H-0.271900   | 0  | -4.347711  | -12.075377 | 4.061896  | L |
| H-H1-0.097600  | 0  | -3.309779  | -12.444398 | 6.128091  | L |
| H-H1-0.097600  | 0  | -4.258194  | -11.032377 | 6.652679  | L |
| H-H1-0.097600  | 0  | -2.620699  | -10.808915 | 6.017749  | L |
| C-CT--0.366200 | -1 | -12.142308 | 5.078439   | -0.672988 | L |
| C-C-0.597200   | 0  | -10.714084 | 5.264755   | -0.232679 | L |
| O-O--0.567900  | 0  | -10.401738 | 5.004063   | 0.923804  | L |
| H-HC-0.112300  | 0  | -12.534972 | 6.028121   | -1.029430 | L |
| H-HC-0.112300  | 0  | -12.729374 | 4.733240   | 0.176379  | L |

|                |    |            |          |           |           |
|----------------|----|------------|----------|-----------|-----------|
| H-HC-0.112300  | 0  | -12.174377 | 4.331338 | -1.463908 | L         |
| N-N--0.415700  | 0  | -9.863617  | 5.705422 | -1.155702 | L         |
| C-CT--0.025200 | -1 | -8.430390  | 5.868016 | -0.926979 | L         |
| C-C-0.597300   | 0  | -7.610688  | 5.778445 | -2.189636 | L         |
| O-O--0.567900  | 0  | -8.112988  | 6.110663 | -3.270442 | L         |
| H-H-0.271900   | 0  | -10.172832 | 5.863305 | -2.102379 | L         |
| H-H1-0.069800  | 0  | -8.114229  | 5.066790 | -0.268786 | L         |
| H-H1-0.069800  | 0  | -8.230020  | 6.823183 | -0.443742 | L         |
| N-N--0.415700  | 0  | -6.360069  | 5.343972 | -2.019282 | L H-H1 48 |
| C-CT--0.530209 | -1 | -5.345526  | 5.286422 | -3.069307 | H         |
| C-C-0.568093   | 0  | -4.613106  | 3.954761 | -2.965912 | H         |
| O-O--0.528105  | 0  | -4.593720  | 3.325255 | -1.902309 | H         |
| C-CT-0.298500  | 0  | -4.396546  | 6.506743 | -2.995830 | L H-H1 48 |
| C-CT--0.319200 | 0  | -5.147519  | 7.808114 | -3.288659 | L         |
| C-CT--0.319200 | 0  | -3.689196  | 6.625983 | -1.643252 | L         |
| H-H-0.271900   | 0  | -6.066277  | 5.030122 | -1.096500 | L         |
| H-H1-0.184096  | 0  | -5.865554  | 5.354613 | -4.032310 | H         |
| H-HC--0.029700 | 0  | -3.634916  | 6.398446 | -3.766268 | L         |
| H-HC-0.079100  | 0  | -5.858918  | 8.016262 | -2.491342 | L         |
| H-HC-0.079100  | 0  | -5.680049  | 7.714769 | -4.233813 | L         |
| H-HC-0.079100  | 0  | -4.433764  | 8.627980 | -3.355932 | L         |
| H-HC-0.079100  | 0  | -4.411585  | 6.750891 | -0.838593 | L         |
| H-HC-0.079100  | 0  | -3.008696  | 7.475042 | -1.653783 | L         |
| H-HC-0.079100  | 0  | -3.110477  | 5.720436 | -1.450567 | L         |
| N-N--0.610103  | 0  | -3.961185  | 3.548813 | -4.080066 | H         |
| C-CT--0.314060 | -1 | -4.233033  | 3.987138 | -5.441930 | H         |
| C-C-0.597300   | 0  | -5.348529  | 3.161647 | -6.075417 | L H-H1 50 |
| O-O--0.567900  | 0  | -5.477007  | 1.956315 | -5.860303 | L         |
| C-CT--0.110200 | 0  | -2.942030  | 3.894687 | -6.293077 | L H-H1 50 |
| C-CT-0.353100  | 0  | -1.949404  | 5.065128 | -6.092976 | L         |
| C-CT--0.412100 | 0  | -1.077971  | 4.964304 | -4.840709 | L         |
| C-CT--0.412100 | 0  | -0.997017  | 5.144253 | -7.291053 | L         |
| H-H-0.398207   | 0  | -3.313277  | 2.766968 | -3.952380 | H         |
| H-H1-0.165130  | 0  | -4.547373  | 5.031143 | -5.450255 | H         |
| H-HC-0.045700  | 0  | -3.243357  | 3.897619 | -7.340576 | L         |
| H-HC-0.045700  | 0  | -2.437353  | 2.947183 | -6.107720 | L         |
| H-HC--0.036100 | 0  | -2.509939  | 6.000008 | -6.057216 | L         |
| H-HC-0.100000  | 0  | -0.463655  | 4.066654 | -4.881866 | L         |
| H-HC-0.100000  | 0  | -1.707661  | 4.903202 | -3.952639 | L         |
| H-HC-0.100000  | 0  | -0.441370  | 5.842470 | -4.749058 | L         |
| H-HC-0.100000  | 0  | -0.421230  | 4.222253 | -7.362510 | L         |
| H-HC-0.100000  | 0  | -0.315292  | 5.984017 | -7.158564 | L         |
| H-HC-0.100000  | 0  | -1.566534  | 5.292183 | -8.206670 | L         |
| N-N--0.415700  | 0  | -6.136010  | 3.810937 | -6.928237 | L         |
| C-CT--0.038900 | -1 | -7.324008  | 3.213412 | -7.549265 | L         |
| C-C-0.597300   | 0  | -7.078607  | 1.875249 | -8.236027 | L         |
| O-O--0.567900  | 0  | -7.960889  | 1.020016 | -8.280364 | L         |
| C-CT-0.365400  | -1 | -7.960818  | 4.135316 | -8.613468 | L         |
| O-OH--0.676100 | -1 | -7.898903  | 5.493628 | -8.168937 | L         |
| C-CT--0.243800 | 0  | -9.439441  | 3.845788 | -8.872084 | L         |
| H-H-0.271900   | 0  | -6.011124  | 4.808780 | -7.013360 | L         |
| H-H1-0.100700  | 0  | -8.064382  | 3.074048 | -6.768479 | L         |
| H-H1-0.004300  | 0  | -7.405457  | 4.056631 | -9.549086 | L         |
| H-HC-0.064200  | 0  | -9.555699  | 2.841220 | -9.278337 | L         |

|                |    |            |           |            |           |
|----------------|----|------------|-----------|------------|-----------|
| H-HC-0.064200  | 0  | -9.832940  | 4.558542  | -9.596577  | L         |
| H-HC-0.064200  | 0  | -10.002950 | 3.919243  | -7.941139  | L         |
| H-HO-0.410200  | -1 | -8.797028  | 5.829141  | -8.134517  | L         |
| N-N--0.415700  | 0  | -5.901350  | 1.736780  | -8.842498  | L         |
| C-CT--0.025200 | -1 | -5.517074  | 0.578440  | -9.635765  | L         |
| C-C-0.597300   | 0  | -4.628206  | -0.430311 | -8.937412  | L         |
| O-O--0.567900  | 0  | -4.135930  | -1.337656 | -9.608886  | L         |
| H-H-0.271900   | 0  | -5.213214  | 2.449395  | -8.650603  | L         |
| H-H1-0.069800  | 0  | -4.981653  | 0.923651  | -10.518994 | L         |
| H-H1-0.069800  | 0  | -6.406422  | 0.048252  | -9.976231  | L         |
| N-N--0.415700  | 0  | -4.414795  | -0.253721 | -7.628601  | L H-H1 54 |
| C-CT--0.539097 | -1 | -3.474858  | -1.026041 | -6.827190  | H         |
| C-C-0.572106   | 0  | -4.208790  | -1.479190 | -5.563818  | H         |
| O-O--0.533001  | 0  | -4.926452  | -2.475180 | -5.628885  | H         |
| C-CT-0.130300  | 0  | -2.135190  | -0.265434 | -6.629481  | L H-H1 54 |
| C-CT--0.043000 | 0  | -1.528215  | 0.232425  | -7.963306  | L         |
| C-CT--0.320400 | 0  | -1.165090  | -1.229080 | -5.924049  | L         |
| C-CT--0.066000 | 0  | -0.213679  | 1.010137  | -7.816131  | L         |
| H-H-0.271900   | 0  | -4.877092  | 0.520401  | -7.159591  | L         |
| H-H1-0.180646  | 0  | -3.253253  | -1.945679 | -7.378811  | H         |
| H-HC-0.018700  | 0  | -2.307025  | 0.599669  | -5.989920  | L         |
| H-HC-0.023600  | 0  | -2.234993  | 0.909341  | -8.441645  | L         |
| H-HC-0.023600  | 0  | -1.366447  | -0.617322 | -8.627629  | L         |
| H-HC-0.088200  | 0  | -0.968951  | -2.095754 | -6.553586  | L         |
| H-HC-0.088200  | 0  | -1.583869  | -1.564017 | -4.976737  | L         |
| H-HC-0.088200  | 0  | -0.229166  | -0.727951 | -5.691424  | L         |
| H-HC-0.018600  | 0  | -0.341876  | 1.814890  | -7.093019  | L         |
| H-HC-0.018600  | 0  | 0.059589   | 1.439848  | -8.779826  | L         |
| H-HC-0.018600  | 0  | 0.589887   | 0.349452  | -7.492116  | L         |
| N-N--0.611145  | 0  | -4.076405  | -0.715591 | -4.445250  | H         |
| C-CT--0.109296 | -1 | -4.640165  | -1.118091 | -3.165138  | H         |
| C-C-0.597300   | 0  | -6.167934  | -1.141589 | -3.175129  | L H-H1 56 |
| O-O--0.567900  | 0  | -6.799020  | -2.077768 | -2.669367  | L         |
| C-CT--0.388038 | 0  | -4.107727  | -0.309898 | -2.002758  | H         |
| H-H-0.369964   | 0  | -3.420831  | 0.056495  | -4.417047  | H         |
| H-H1-0.178541  | 0  | -4.385884  | -2.169905 | -2.988172  | H         |
| H-H1-0.157964  | 0  | -4.719937  | -0.571612 | -1.133128  | H         |
| H-H1-0.179833  | 0  | -4.180515  | 0.769637  | -2.157366  | H         |
| H-HS-0.319500  | 0  | -1.976627  | 0.458942  | -1.346472  | H         |
| N-N--0.415700  | 0  | -6.758678  | -0.144481 | -3.820765  | L         |
| C-CT--0.087500 | -1 | -8.196399  | -0.079455 | -4.064676  | L         |
| C-C-0.597300   | 0  | -8.683852  | -1.230164 | -4.931983  | L         |
| O-O--0.567900  | 0  | -9.630047  | -1.923845 | -4.559072  | L         |
| C-CT-0.298500  | 0  | -8.591490  | 1.284130  | -4.650809  | L         |
| C-CT--0.319200 | 0  | -10.108215 | 1.415564  | -4.846157  | L         |
| C-CT--0.319200 | 0  | -8.142654  | 2.457937  | -3.765953  | L         |
| H-H-0.271900   | 0  | -6.122617  | 0.544654  | -4.215437  | L         |
| H-H1-0.096900  | 0  | -8.699357  | -0.178139 | -3.105201  | L         |
| H-HC--0.029700 | 0  | -8.113431  | 1.369850  | -5.618183  | L         |
| H-HC-0.079100  | 0  | -10.618072 | 1.268425  | -3.893789  | L         |
| H-HC-0.079100  | 0  | -10.460116 | 0.674358  | -5.563410  | L         |
| H-HC-0.079100  | 0  | -10.343951 | 2.406120  | -5.234117  | L         |
| H-HC-0.079100  | 0  | -8.596200  | 2.390237  | -2.778978  | L         |
| H-HC-0.079100  | 0  | -8.418810  | 3.406503  | -4.225563  | L         |

|                |    |            |           |           |   |
|----------------|----|------------|-----------|-----------|---|
| H-HC-0.079100  | 0  | -7.058248  | 2.456329  | -3.646897 | L |
| N-N--0.415700  | 0  | -8.046251  | -1.445296 | -6.081255 | L |
| C-CT--0.025200 | -1 | -8.406490  | -2.504039 | -7.021142 | L |
| C-C-0.597300   | 0  | -8.316710  | -3.904506 | -6.428338 | L |
| O-O--0.567900  | 0  | -9.213912  | -4.721650 | -6.624741 | L |
| H-H-0.271900   | 0  | -7.247310  | -0.857080 | -6.282139 | L |
| H-H1-0.069800  | 0  | -7.739698  | -2.454657 | -7.881717 | L |
| H-H1-0.069800  | 0  | -9.427475  | -2.342282 | -7.366318 | L |
| N-N--0.415700  | 0  | -7.235401  | -4.177732 | -5.700430 | L |
| C-CT--0.025200 | -1 | -7.013686  | -5.441830 | -5.009193 | L |
| C-C-0.597300   | 0  | -7.946853  | -5.700506 | -3.837575 | L |
| O-O--0.567900  | 0  | -8.283245  | -6.851617 | -3.564919 | L |
| H-H-0.271900   | 0  | -6.520740  | -3.454644 | -5.631364 | L |
| H-H1-0.069800  | 0  | -5.990761  | -5.459091 | -4.634712 | L |
| H-H1-0.069800  | 0  | -7.131041  | -6.259695 | -5.720236 | L |
| N-N--0.415700  | 0  | -8.333438  | -4.641934 | -3.129527 | L |
| C-CT--0.038900 | -1 | -9.384393  | -4.695853 | -2.111040 | L |
| C-C-0.597300   | 0  | -10.754924 | -4.989389 | -2.712240 | L |
| O-O--0.567900  | 0  | -11.498434 | -5.823518 | -2.195186 | L |
| C-CT-0.365400  | 0  | -9.420294  | -3.390200 | -1.302144 | L |
| O-OH--0.676100 | 0  | -8.182391  | -3.219259 | -0.650306 | L |
| C-CT--0.243800 | 0  | -10.504754 | -3.396258 | -0.225239 | L |
| H-H-0.271900   | 0  | -7.941155  | -3.739247 | -3.375538 | L |
| H-H1-0.100700  | 0  | -9.157351  | -5.508194 | -1.420780 | L |
| H-H1-0.004300  | 0  | -9.588673  | -2.542482 | -1.966492 | L |
| H-HC-0.064200  | 0  | -11.485840 | -3.291632 | -0.687182 | L |
| H-HC-0.064200  | 0  | -10.348524 | -2.562593 | 0.458932  | L |
| H-HC-0.064200  | 0  | -10.470471 | -4.333172 | 0.328973  | L |
| H-HO-0.410200  | 0  | -7.594680  | -2.764436 | -1.287756 | L |
| N-N--0.415700  | 0  | -11.104475 | -4.284677 | -3.789679 | L |
| C-CT--0.149000 | -1 | -12.336345 | -4.479187 | -4.526289 | L |
| H-H-0.271900   | 0  | -10.438075 | -3.601499 | -4.139180 | L |
| H-H1-0.097600  | 0  | -12.412252 | -3.728204 | -5.313615 | L |
| H-H1-0.097600  | 0  | -13.188916 | -4.392959 | -3.851309 | L |
| H-H1-0.097600  | 0  | -12.333195 | -5.472887 | -4.977323 | L |
| N-N2--0.511415 | 0  | 2.084375   | -0.011345 | -1.760652 | H |
| C-CA-0.057801  | 0  | 0.945468   | 0.693581  | -1.694224 | H |
| C-CA-0.063496  | 0  | 0.353734   | 1.294168  | -2.804833 | H |
| C-CA--0.109122 | 0  | 1.005270   | 1.182853  | -4.032649 | H |
| C-CA--0.164490 | 0  | 2.204427   | 0.485643  | -4.101856 | H |
| C-CA-0.098392  | 0  | 2.704282   | -0.107943 | -2.948300 | H |
| C-C-0.541263   | 0  | -1.021779  | 1.925071  | -2.724667 | H |
| O-O--0.574884  | 0  | -1.648787  | 1.958970  | -3.807310 | H |
| H-H4-0.220889  | 0  | 0.492662   | 0.773698  | -0.712214 | H |
| H-HA-0.160434  | 0  | 0.547266   | 1.631733  | -4.905957 | H |
| H-HA-0.142191  | 0  | 2.747203   | 0.394385  | -5.034551 | H |
| H-H4-0.174502  | 0  | 3.617322   | -0.692888 | -2.957961 | H |
| H-H-0.353801   | 0  | -1.463127  | 1.829437  | -0.020211 | H |
| Zn-ZN-0.974537 | 0  | 2.832594   | -1.069740 | -0.035960 | H |
| O-OW--0.834000 | 0  | -2.136430  | -7.244736 | 3.510040  | L |
| H-HW-0.417000  | 0  | -2.569496  | -6.661524 | 2.866822  | L |
| H-HW-0.417000  | 0  | -2.864599  | -7.783638 | 3.860055  | L |
| O-OW--0.783903 | 0  | 1.310937   | -2.552233 | -0.149018 | H |
| H-HW-0.401253  | 0  | 0.902190   | -2.438993 | 0.743136  | H |

|                |   |           |           |           |   |
|----------------|---|-----------|-----------|-----------|---|
| H-HW-0.424111  | 0 | 1.916466  | -3.337527 | -0.177706 | H |
| O-OW--0.834000 | 0 | -3.715819 | -8.436787 | 7.255232  | L |
| H-HW-0.417000  | 0 | -3.763697 | -7.491653 | 7.420328  | L |
| H-HW-0.417000  | 0 | -3.831832 | -8.513526 | 6.295981  | L |
| O-OW--0.834000 | 0 | 7.139622  | -0.015964 | 1.790140  | L |
| H-HW-0.417000  | 0 | 6.838958  | 0.411143  | 2.613069  | L |
| H-HW-0.417000  | 0 | 6.344063  | 0.055031  | 1.238556  | L |
| O-OW--0.834000 | 0 | 7.045671  | -4.935450 | 4.766743  | L |
| H-HW-0.417000  | 0 | 6.097161  | -4.998784 | 5.000480  | L |
| H-HW-0.417000  | 0 | 7.246209  | -5.806518 | 4.422279  | L |
| O-OW--0.834000 | 0 | 8.643767  | -0.913549 | -0.234469 | L |
| H-HW-0.417000  | 0 | 8.151645  | -0.542532 | 0.526329  | L |
| H-HW-0.417000  | 0 | 8.843351  | -0.125762 | -0.760404 | L |
| O-OW--0.834000 | 0 | 12.639631 | -1.080430 | -1.985004 | L |
| H-HW-0.417000  | 0 | 11.779163 | -0.832941 | -2.365078 | L |
| H-HW-0.417000  | 0 | 12.645246 | -2.043758 | -2.094303 | L |
| O-OW--0.834000 | 0 | 8.307922  | -3.285496 | 1.004191  | L |
| H-HW-0.417000  | 0 | 8.519920  | -2.514516 | 0.437399  | L |
| H-HW-0.417000  | 0 | 7.570664  | -2.953157 | 1.526393  | L |
| O-OW--0.834000 | 0 | 4.354652  | -4.895514 | 5.170240  | L |
| H-HW-0.417000  | 0 | 4.084052  | -4.513171 | 6.027947  | L |
| H-HW-0.417000  | 0 | 4.052064  | -4.227253 | 4.544431  | L |
| S-SH--0.326142 | 0 | -2.361108 | -0.785926 | -1.678212 | H |
| O-OW--0.834000 | 0 | -1.449178 | 2.275034  | -1.577830 | H |
